# Supplementary material for: The Specific Inhibition of SOD1 Selectively Promotes Apoptosis of Cancer Cells via Regulation of the ROS Signaling Network
Source: Hindawi journal article supplement (doi:10.1155/2019/9706792), 2019-02-18
Supplement: f1 [file 9706792.f1.zip]

## **Supplementary Materials**

### **The specific inhibition of SOD1 selectively promotes apoptosis of cancer cells via regulation of the ROS signaling network**

**Xiang Li<sup>1</sup>, Yuanyuan Chen<sup>1</sup>, Jidong Zhao, Jiayuan Shi, Mingfang Wang, Shuang Qiu, Yinghui Hu, Yulin Xu, Yanfang Cui, Chunrong Liu\*, Changlin Liu\***

Key Laboratory of Pesticide and Chemical Biology, Ministry of Education, School of Chemistry, Central China Normal University, Wuhan 430079, Hubei, China

<sup>1</sup>These authors contributed equally to this work.

Email: [liuchl@mail.ccnu.edu.cn](mailto:liuchl@mail.ccnu.edu.cn) (Changlin Liu), [liucr@mail.ccnu.edu.cn](mailto:liucr@mail.ccnu.edu.cn) (Chunrong Liu)

**Figure S1**

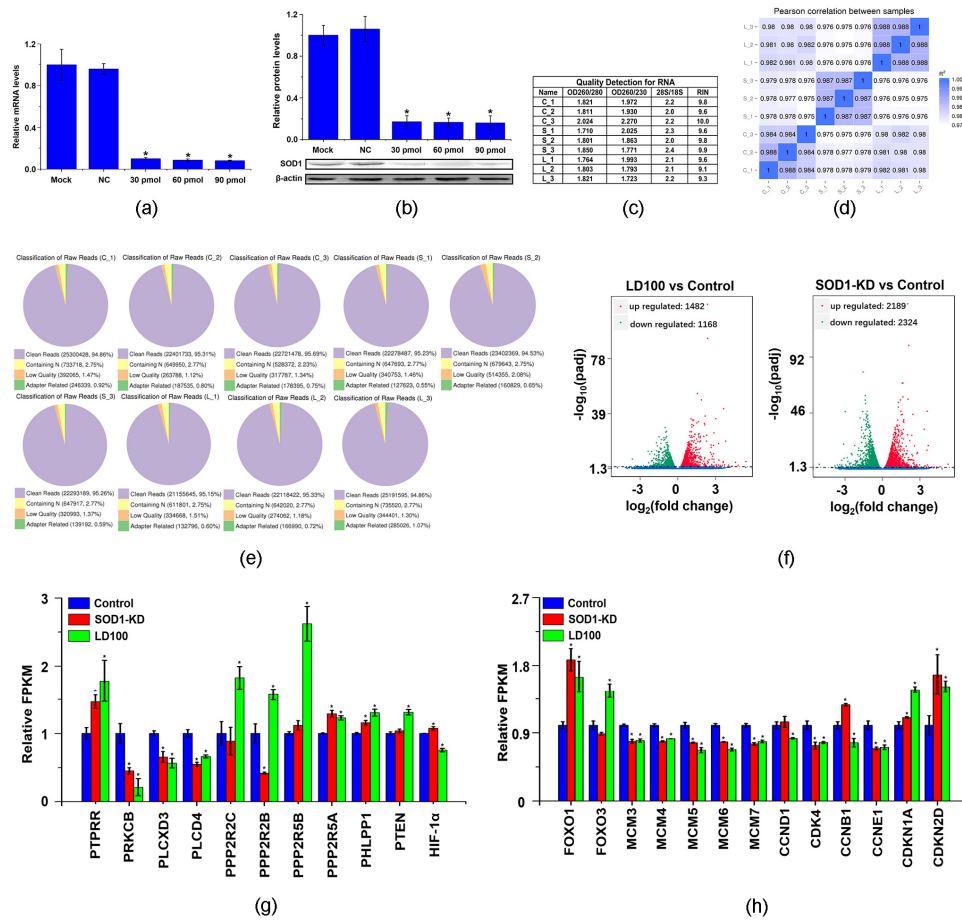

**Figure S1: The levels of SOD1 in SOD1 knockdown HeLa cells and key DEGs in LD100-treated HeLa cells, related to Figure 1.**

(a, b) After transfection with validated siRNA of SOD1 in HeLa cells, relative mRNA (a) and protein (b) levels of SOD1 are measured by RT-qPCR and western blotting, respectively. The relative intensity of protein bands (means  $\pm$  SD) in the western blotting is quantified by using ImageJ software and normalized through the negative control, respectively. Representative results from three independent experiments are shown (b). (c) OD260/280, OD260/230, rRNA Ratio (28S/18S) and RNA Integrity Number (RIN) of RNAs extracted from the control-group (designated as C), SOD1 knockdown-group (designated as S) and SOD1 inhibition-group (designated as L) are determined, respectively. (d) Person correlations between parallel mRNA-sequencing samples. The mRNA-sequencing data are representative of three independent experiments. (e) The percentages of clean reads, poly-N containing reads, low quality reads and adapters containing reads in raw data from the mRNA-sequencing samples. (f) The differential mRNA expression displayed as a volcano plot of  $\log_2(\text{fold change})$  vs. the  $-\log_{10}(\text{padj})$  for each gene. Genes considered significant below  $\text{padj} < 0.05$  are highlighted, respectively, in red and green for up-regulation and down-regulation. (g, h) Relative FPKM of key DEGs in LD100-treated HeLa cells. Data are mean of triplicate samples  $\pm$  SD (\* $P < 0.05$ ; unpaired Student's t test;  $n = 3$ ), and all error bars are SD.

**Figure S2**

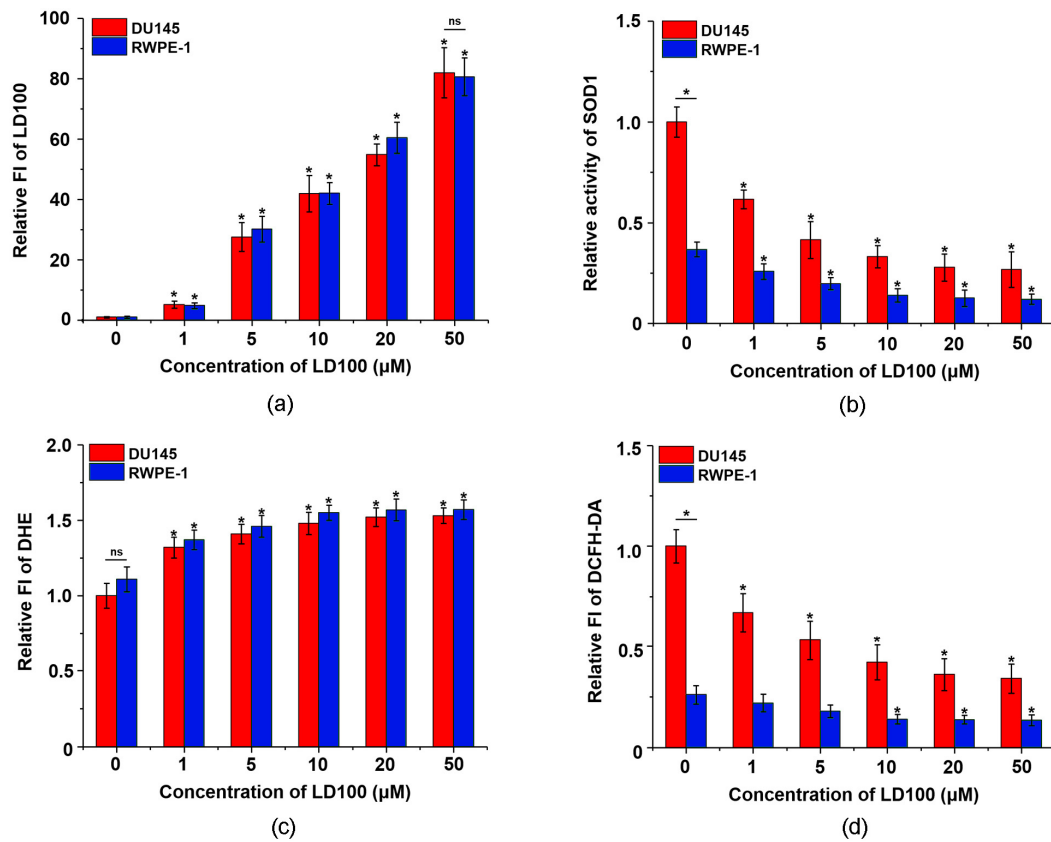

**Figure S2: SOD1 activity and H<sub>2</sub>O<sub>2</sub> and O<sub>2</sub><sup>•-</sup> levels within LD100-treated DU145 and RWPE-1 cells, related to Figure 2.**

(a) The uptake of LD100 within DU145 and RWPE-1 cells. After treatment with LD100 (0-50 μM) for 24 h, cells were washed, and then the intracellular fluorescence intensity (FI) of LD100 were measured by flow cytometry. (b) After treatment with LD100 (0-50 μM) for 24 h, SOD1 activity within the cells are measured by HT Superoxide Dismutase Assay Kit. (c, d) After treatment with LD100 (0-50 μM) for 24 h, cells are washed and incubated with 5 μM DHE or DCFH-DA in the dark for 20 min. Following subtracting the background fluorescence of LD100, the fluorescence intensity of DHE (c) or DCFH-DA (d) are determined. The DHE and DCFH-DA fluorescence intensity are positively correlated with O<sub>2</sub><sup>•-</sup> and H<sub>2</sub>O<sub>2</sub>, respectively. Data are mean of triplicate samples ± SD (ns-no statistically significant; \*P < 0.05; unpaired Student's t test), and all error bars are SD.

**Figure S3**

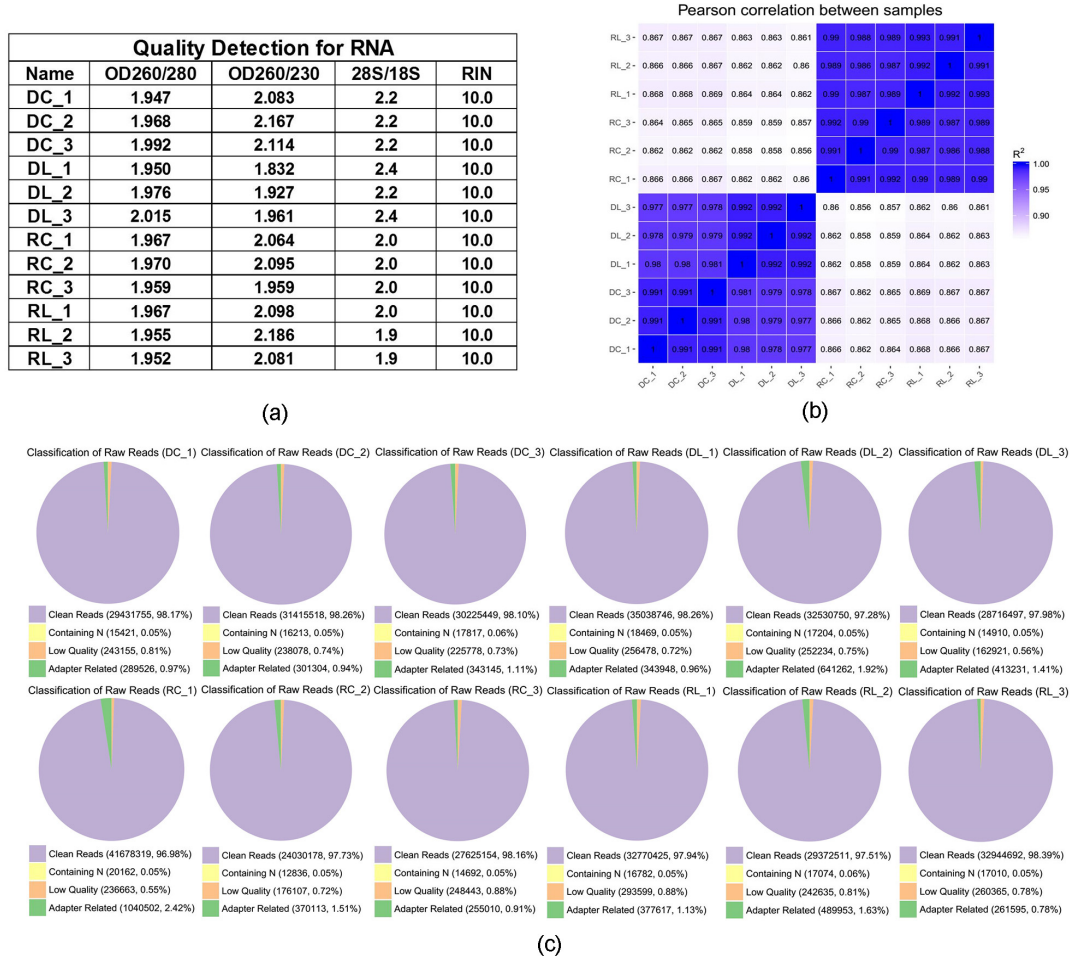

**Figure S3: Successful construction of mRNA-sequencing in LD100-treated DU145 and RWPE-1 cells, relative to Figure 2.**

(a) OD260/280, OD260/230, rRNA Ratio (28S/18S) and RNA Integrity Number (RIN) of RNAs extracted from the control-group of DU145 (designated as DC), LD100 treated-group of DU145 (DL), the control-group of RWPE-1 (designated as RC), LD100 treated-group of RWPE-1 (RL) are determined, respectively. (b) Person correlations between mRNA-sequencing samples. The mRNA-sequencing data are the representative of three independent experiments. (c) The percentages of clean reads, poly-N containing reads, low quality reads and adapters containing reads in raw data.

**Figure S4**

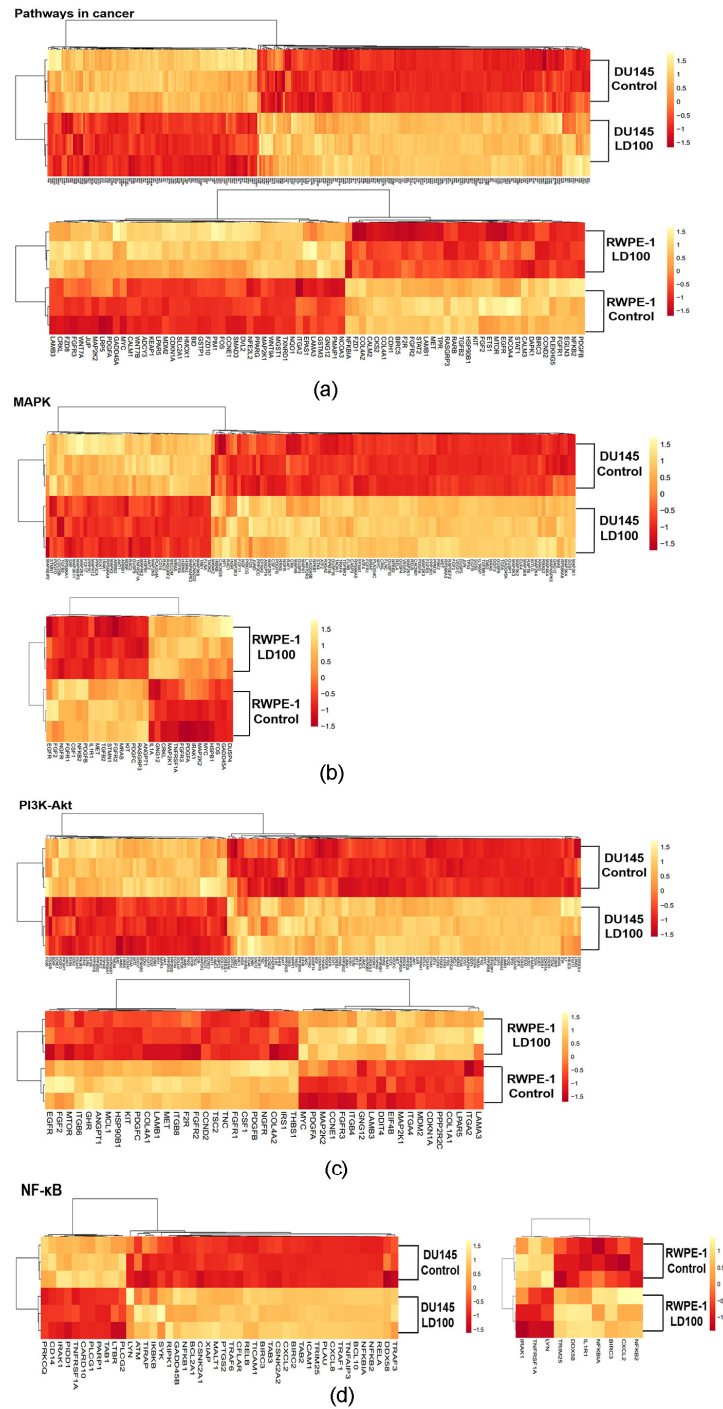

**Figure S4: Many key genes in representative signaling pathways are selectively regulated upon the specific SOD1 inhibition, relative to Figure 2.**

(a-d) The cluster analysis of DEGs in cancer related signaling pathways such as MAPK, PI3K-Akt and NF-κB of LD100-treated DU145 and RWPE-1 cells. Based on normalized  $\log_{10}(\text{FPKM}+1)$ , these heat maps are drawn using yellow and red for high-expressed genes and low-expressed genes, respectively.

**Figure S5**

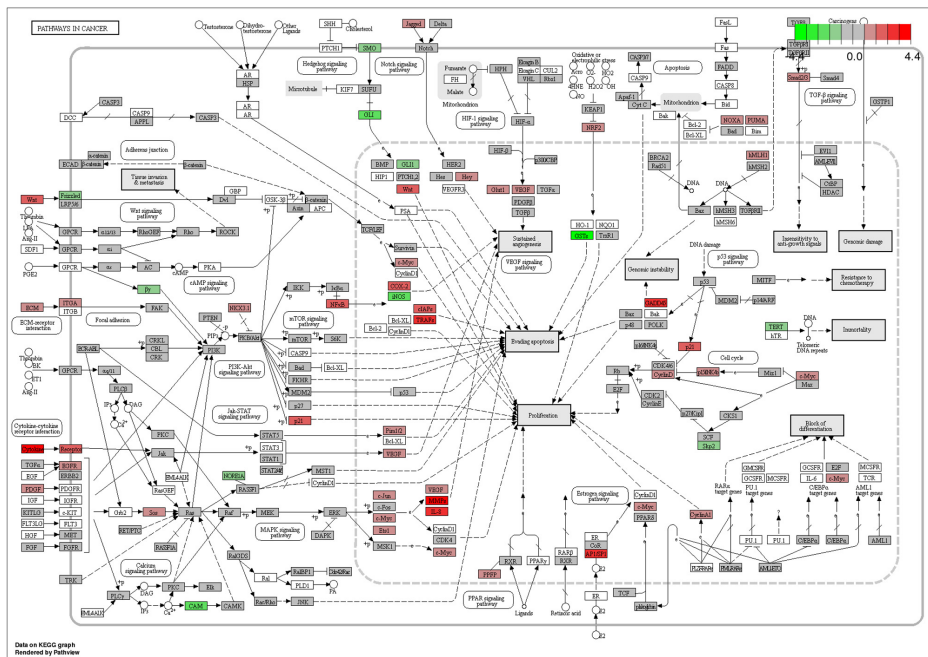

(a)

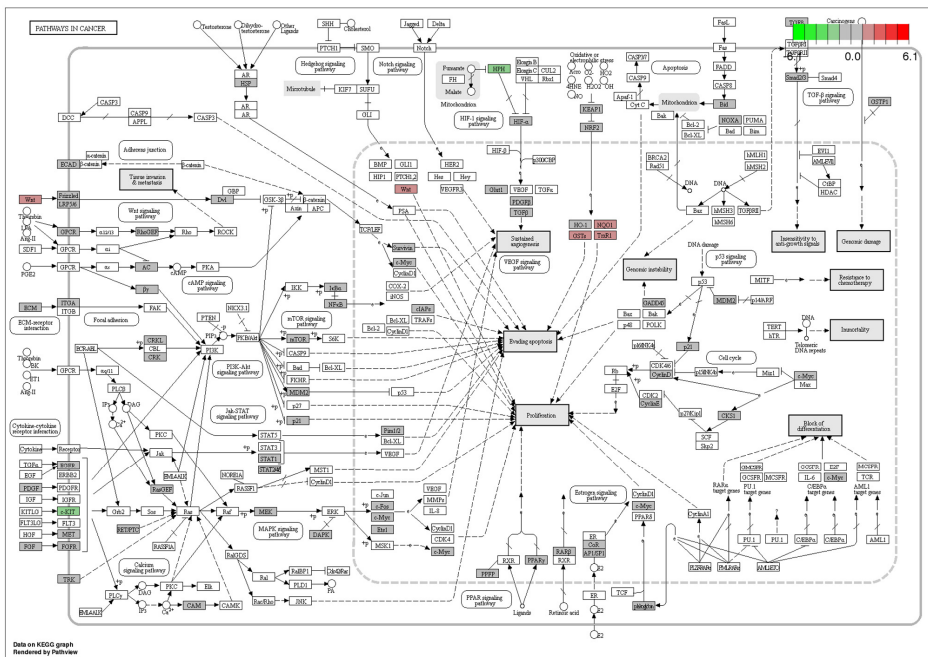

(b)

**Figure S5: The specific SOD1 inhibition selectively regulates cancer pathways in cancer cells, relative to Figure 2.**

Enriched cancer related KEGG pathways in DU145 and RWPE-1 cells after LD100-treatment, respectively. Based on FPKM, these heat maps are drawn using red and green for high-expressed genes and low-expressed genes, respectively.

**Figure S6: Many key genes in cell cycle, p53 and apoptosis signaling pathways are selectively regulated upon the specific SOD1 inhibition, relative to Figure 2.**

(a)

(b)

(C)



### Figure S7

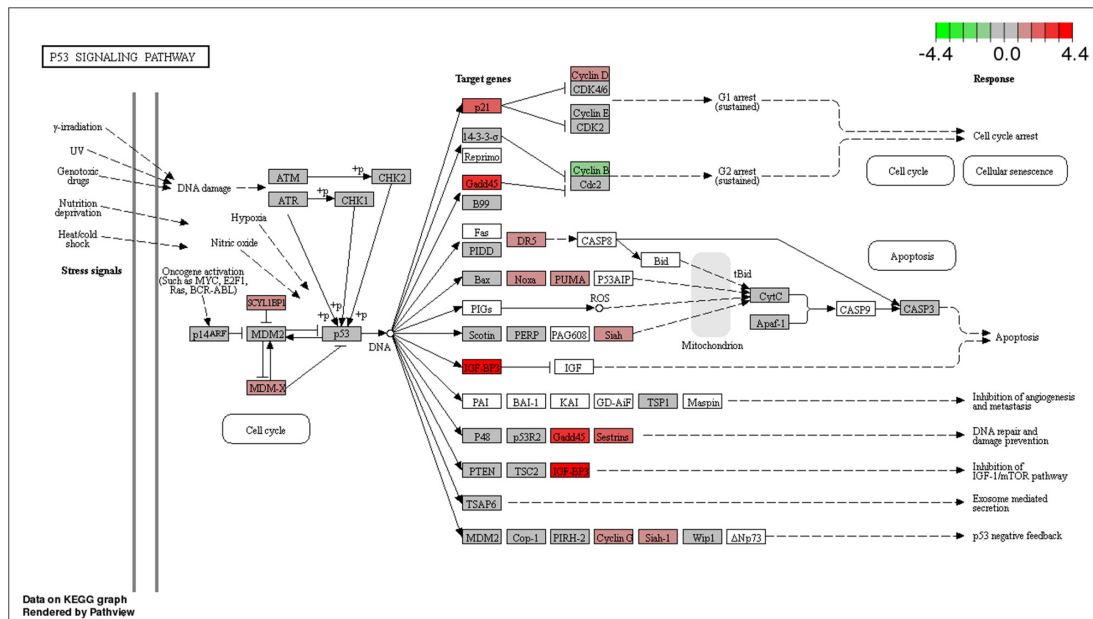

(a)

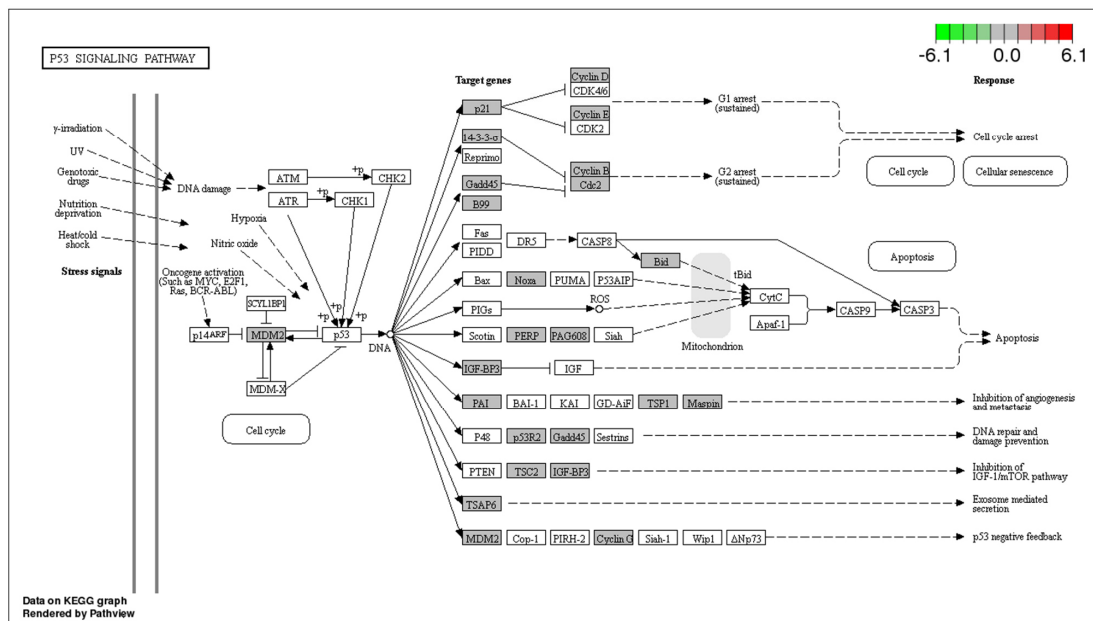

(b)

**Figure S7: The specific SOD1 inhibition selectively activates p53 signaling pathway in cancer cells, relative to Figure 2.**

Enriched KEGG p53 signaling pathway in LD100-treated DU145 and RWPE-1 cells, respectively. Based on FPKM, these heat maps are drawn using red and green for high-expressed genes and low-expressed genes, respectively.



**Figure S8**

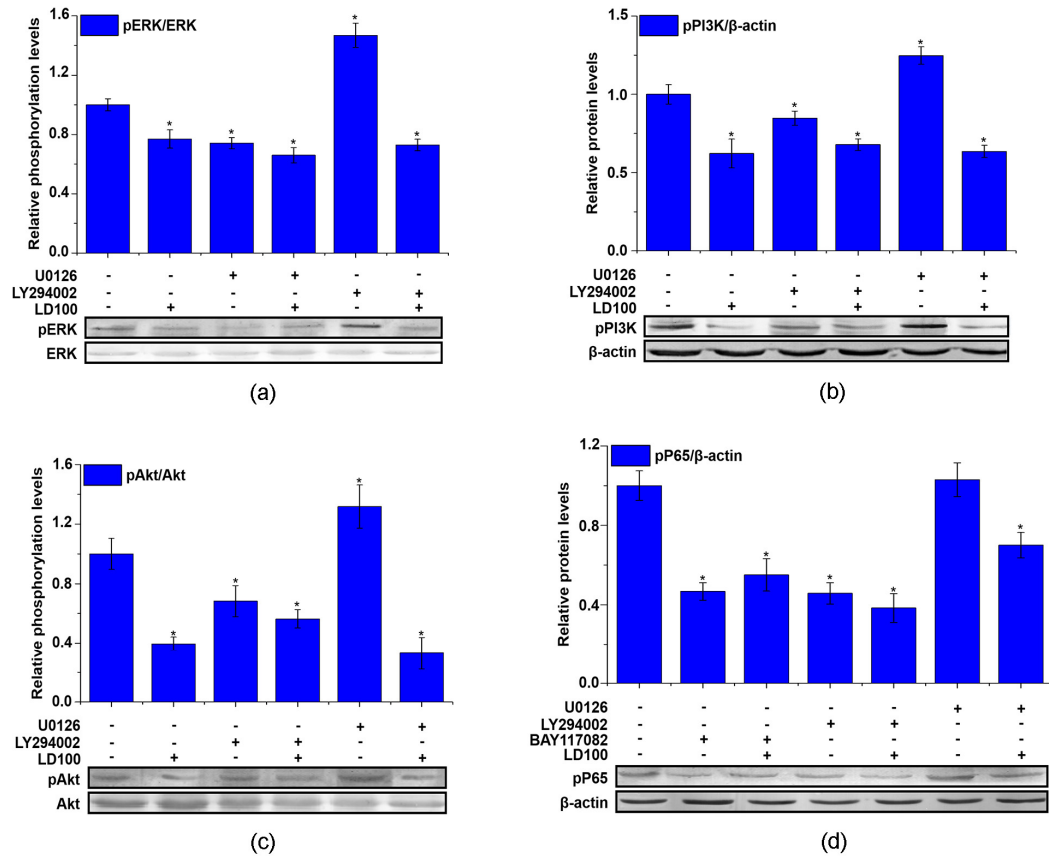

**Figure S8: Specific SOD1 inhibition represses the crosstalk of ERK, PI3K and NF-κB signaling pathways in cancer cells.**

(a-d) The crosstalk among ERK, PI3K-Akt and NF-κB signaling pathways is evaluated using LD100 and the inhibitors of ERK (U0126), PI3K (LY294002), and NF-κB (BAY117082) by western blotting analysis. HeLa cells are incubated respectively with 50 μM LD100 and inhibitors of these signaling pathways (10 μM U0126, 10 μM LY294002, and 5 μM BAY117082) for 24 h in an orthogonal fashion. The relative intensity of protein bands (means ± SD) in the western blotting is quantified by using ImageJ software and normalized through the negative control, respectively. Representative results from three independent experiments are shown. Data are mean of triplicate samples ± SD (\*P < 0.05; unpaired Student's t test), and all error bars are SD.

**Figure S9**

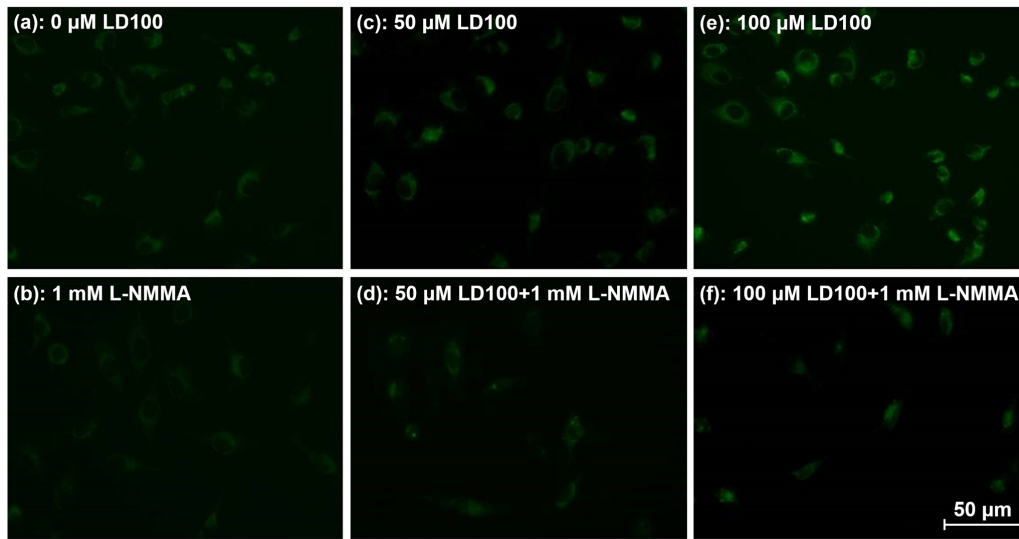

**Figure S9: The specific SOD1 inhibition increases the intracellular peroxynitrite content, relative to Figure 5.**

(a-f) After incubation for 24 h, respectively, with LD100 (0, 50, 100  $\mu$ M) and L-NMMA (1 mM), a cell membrane-permeable competitive NOS inhibitor, the level of peroxynitrite in HeLa cells is monitored by Dihydrorhodamine 123 using fluorescence microscopy.

**Figure S10**

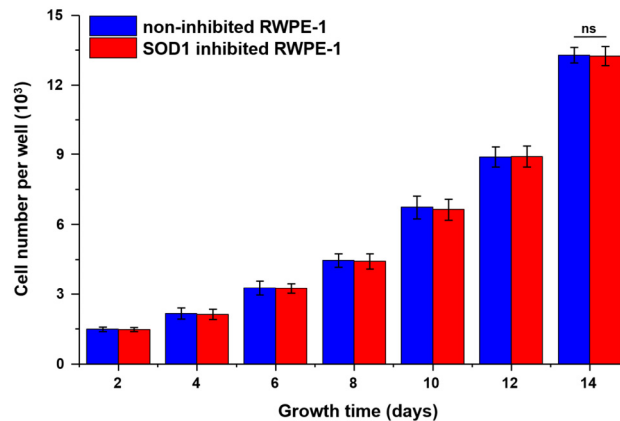

**Figure S10: The specific SOD1 inhibition does not affect the growth and proliferation of normal cells, relative to Figure 6.**

At first, RWPE-1 cells are counted by flow cytometry. Then, the accurately counted  $1.0 \times 10^3$  RWPE-1 cells are seeded on a 6-well plate in K-SFM culture medium. After incubating the cells with or without 50  $\mu$ M LD100 for a different period of time, cell number of each sample is counted by flow cytometry. Data are mean of triplicate samples  $\pm$  SD (ns-no statistically significant; \* $P < 0.05$ ; unpaired Student's t test), and all error bars are SD.

## **Supplemental Table Legends**

**Table S1: Quality evaluation of transcriptome library in HeLa cells, related to Figure 1.**

**Table S2: GO classification of DEGs in LD100 treated and SOD1 knockdown HeLa cells, related to Figure 1.**

**Table S3: KEGG pathway enrichment of DEGs in LD100 treated and SOD1 knockdown HeLa cells, related to Figure 1.**

**Table S4: Quality evaluation of transcriptome library in DU145 and RWPE-1 cells, related to Figure 2.**

**Table S5: GO classification of DEGs in LD100 treated DU145 and RWPE-1 cells, related to Figure 2.**

**Table S6: KEGG pathway enrichment of DEGs in LD100 treated DU145 and RWPE-1 cells, related to Figure 2.**
