# Supplementary material for: The Specific Inhibition of SOD1 Selectively Promotes Apoptosis of Cancer Cells via Regulation of the ROS Signaling Network
Source: Oxid Med Cell Longev. 2019 Feb 18;2019:9706792. doi: 10.1155/2019/9706792 (PMC6398008; doi:10.1155/2019/9706792)
Supplement: Supplementary Materials — Figure S1: the levels of SOD1 in SOD1 knockdown HeLa cells and key DEGs in LD100-treated HeLa cells. Figure S2: SOD1 activity and H2O2 and O2 •− levels within LD100-treated DU145 and RWPE-1 cells. Figure S3: successful construction of mRNA sequencing in LD100-treated DU145 and RWPE-1 cells. Figure S4: many key genes in representative signaling pathways are selectively regulated upon the specific SOD1 inhibition. Figure S5: the specific SOD1 inhibition selectively regulates cancer pathways in cancer cells. Figure S6: many key genes in the cell cycle and p53 and apoptosis signaling pathways are selectively regulated upon the specific SOD1 inhibition. Figure S7: the specific SOD1 inhibition selectively activates the p53 signaling pathway in cancer cells. Figure S8: specific SOD1 inhibition represses the crosstalk of ERK, PI3K, and NF-κB signaling pathways in cancer cells. Figure S9: the specific SOD1 inhibition increases the intracellular peroxynitrite content. Figure S10: the specific SOD1 inhibition does not affect the growth and proliferation of normal cells. Table S1: quality evaluation of transcriptome library in HeLa cells. Table S2: GO classification of DEGs in LD100-treated and SOD1 knockdown HeLa cells. Table S3: KEGG pathway enrichment of DEGs in LD100-treated and SOD1 knockdown HeLa cells. Table S4: quality evaluation of transcriptome library in DU145 and RWPE-1 cells. Table S5: GO classification of DEGs in LD100-treated DU145 and RWPE-1 cells. Table S6: KEGG pathway enrichment of DEGs in LD100-treated DU145 and RWPE-1 cells. [file 9706792.f1.zip]

Archive with 7 entries (7 files):
- Revised Supplementary Materials.pdf
- Table S6.xls
- Table S5.xls
- Table S1.xls
- Table S4.xls
- Table S3.xls
- Table S2.xls
