# Supplementary material for: The Specific Inhibition of SOD1 Selectively Promotes Apoptosis of Cancer Cells via Regulation of the ROS Signaling Network
Source: Oxid Med Cell Longev. 2019 Feb 18;2019:9706792. doi: 10.1155/2019/9706792 (PMC6398008; doi:10.1155/2019/9706792)
Supplement: Supplementary Materials — Figure S1: the levels of SOD1 in SOD1 knockdown HeLa cells and key DEGs in LD100-treated HeLa cells. Figure S2: SOD1 activity and H2O2 and O2 •− levels within LD100-treated DU145 and RWPE-1 cells. Figure S3: successful construction of mRNA sequencing in LD100-treated DU145 and RWPE-1 cells. Figure S4: many key genes in representative signaling pathways are selectively regulated upon the specific SOD1 inhibition. Figure S5: the specific SOD1 inhibition selectively regulates cancer pathways in cancer cells. Figure S6: many key genes in the cell cycle and p53 and apoptosis signaling pathways are selectively regulated upon the specific SOD1 inhibition. Figure S7: the specific SOD1 inhibition selectively activates the p53 signaling pathway in cancer cells. Figure S8: specific SOD1 inhibition represses the crosstalk of ERK, PI3K, and NF-κB signaling pathways in cancer cells. Figure S9: the specific SOD1 inhibition increases the intracellular peroxynitrite content. Figure S10: the specific SOD1 inhibition does not affect the growth and proliferation of normal cells. Table S1: quality evaluation of transcriptome library in HeLa cells. Table S2: GO classification of DEGs in LD100-treated and SOD1 knockdown HeLa cells. Table S3: KEGG pathway enrichment of DEGs in LD100-treated and SOD1 knockdown HeLa cells. Table S4: quality evaluation of transcriptome library in DU145 and RWPE-1 cells. Table S5: GO classification of DEGs in LD100-treated DU145 and RWPE-1 cells. Table S6: KEGG pathway enrichment of DEGs in LD100-treated DU145 and RWPE-1 cells. [file 9706792.f1.zip › Table S1.xls]

## Sheet: Sheet1
Quality evaluation of transcriptome library in HeLa cells
Sample_name	C_1	C_2	C_3	S_1	S_2	S_3	L_1	L_2	L_3
Total reads	50600856	44803466	45442956	44556974	46804738	44586378	42311290	44236844	50383190
Total mapped	47664782 (94.2%)	42310487 (94.44%)	43095711 (94.83%)	42054318 (94.38%)	43872104 (93.73%)	42170603 (94.58%)	39900837 (94.3%)	41829845 (94.56%)	47584373 (94.44%)
Multiple mapped	992827 (1.96%)	864287 (1.93%)	899890 (1.98%)	882942 (1.98%)	924950 (1.98%)	878328 (1.97%)	809354 (1.91%)	884053 (2%)	1015965 (2.02%)
Uniquely mapped	46671955 (92.24%)	41446200 (92.51%)	42195821 (92.85%)	41171376 (92.4%)	42947154 (91.76%)	41292275 (92.61%)	39091483 (92.39%)	40945792 (92.56%)	46568408 (92.43%)
Splice reads	17724331 (35.03%)	15773250 (35.21%)	17629775 (38.8%)	15868135 (35.61%)	16638306 (35.55%)	15794443 (35.42%)	15254033 (36.05%)	16414685 (37.11%)	18240105 (36.2%)
