# Supplementary material for: The Specific Inhibition of SOD1 Selectively Promotes Apoptosis of Cancer Cells via Regulation of the ROS Signaling Network
Source: Oxid Med Cell Longev. 2019 Feb 18;2019:9706792. doi: 10.1155/2019/9706792 (PMC6398008; doi:10.1155/2019/9706792)
Supplement: Supplementary Materials — Figure S1: the levels of SOD1 in SOD1 knockdown HeLa cells and key DEGs in LD100-treated HeLa cells. Figure S2: SOD1 activity and H2O2 and O2 •− levels within LD100-treated DU145 and RWPE-1 cells. Figure S3: successful construction of mRNA sequencing in LD100-treated DU145 and RWPE-1 cells. Figure S4: many key genes in representative signaling pathways are selectively regulated upon the specific SOD1 inhibition. Figure S5: the specific SOD1 inhibition selectively regulates cancer pathways in cancer cells. Figure S6: many key genes in the cell cycle and p53 and apoptosis signaling pathways are selectively regulated upon the specific SOD1 inhibition. Figure S7: the specific SOD1 inhibition selectively activates the p53 signaling pathway in cancer cells. Figure S8: specific SOD1 inhibition represses the crosstalk of ERK, PI3K, and NF-κB signaling pathways in cancer cells. Figure S9: the specific SOD1 inhibition increases the intracellular peroxynitrite content. Figure S10: the specific SOD1 inhibition does not affect the growth and proliferation of normal cells. Table S1: quality evaluation of transcriptome library in HeLa cells. Table S2: GO classification of DEGs in LD100-treated and SOD1 knockdown HeLa cells. Table S3: KEGG pathway enrichment of DEGs in LD100-treated and SOD1 knockdown HeLa cells. Table S4: quality evaluation of transcriptome library in DU145 and RWPE-1 cells. Table S5: GO classification of DEGs in LD100-treated DU145 and RWPE-1 cells. Table S6: KEGG pathway enrichment of DEGs in LD100-treated DU145 and RWPE-1 cells. [file 9706792.f1.zip › Table S2.xls]

## Sheet: Sheet1
GO classification of DEGs in LD100 treated HeLa cells						GO classification of DEGs in SOD1 knockdown HeLa cells
GO_accession	Description	Term_type	p-Value	padj		GO_accession	Description	Term_type	p-Value	padj
GO:0005737	cytoplasm	cellular_component	3.8974e-31	8.0832e-27		GO:0043229	intracellular organelle	cellular_component	3.7237e-56	7.723e-52
GO:0005515	protein binding	molecular_function	3.5349e-28	3.6657e-24		GO:0044424	intracellular part	cellular_component	2.4676e-54	1.9957e-50
GO:0005622	intracellular	cellular_component	2.2594e-26	1.562e-22		GO:0043231	intracellular membrane-bounded organelle	cellular_component	2.8867e-54	1.9957e-50
GO:0044424	intracellular part	cellular_component	1.632e-25	8.4621e-22		GO:0043227	membrane-bounded organelle	cellular_component	1.4334e-53	7.4324e-50
GO:0044444	cytoplasmic part	cellular_component	2.7636e-23	1.1463e-19		GO:0005622	intracellular	cellular_component	1.9636e-51	8.1448e-48
GO:0043231	intracellular membrane-bounded organelle	cellular_component	1.2515e-20	3.8812e-17		GO:0043226	organelle	cellular_component	6.6899e-51	2.0574e-47
GO:0043227	membrane-bounded organelle	cellular_component	1.3099e-20	3.8812e-17		GO:0044446	intracellular organelle part	cellular_component	6.9441e-51	2.0574e-47
GO:0043229	intracellular organelle	cellular_component	5.1421e-20	1.3331e-16		GO:0044422	organelle part	cellular_component	3.3321e-47	8.6384e-44
GO:0043226	organelle	cellular_component	6.699e-20	1.5438e-16		GO:0005515	protein binding	molecular_function	5.508e-41	1.2693e-37
GO:0044237	cellular metabolic process	biological_process	2.1386e-19	4.4355e-16		GO:0044428	nuclear part	cellular_component	2.1178e-40	4.3923e-37
GO:0005829	cytosol	cellular_component	1.3984e-18	2.6367e-15		GO:0005654	nucleoplasm	cellular_component	1.5944e-37	3.0062e-34
GO:0008152	metabolic process	biological_process	1.8487e-18	3.1952e-15		GO:0005737	cytoplasm	cellular_component	5.1998e-37	8.987e-34
GO:0005488	binding	molecular_function	3.4515e-18	5.5065e-15		GO:0031981	nuclear lumen	cellular_component	2.5626e-36	4.0883e-33
GO:0044422	organelle part	cellular_component	5.6379e-17	7.9458e-14		GO:0031974	membrane-enclosed lumen	cellular_component	5.9856e-35	8.8672e-32
GO:0071704	organic substance metabolic process	biological_process	5.9116e-17	7.9458e-14		GO:0005634	nucleus	cellular_component	2.2711e-34	3.1402e-31
GO:0044446	intracellular organelle part	cellular_component	6.3577e-17	7.9458e-14		GO:0043233	organelle lumen	cellular_component	1.6809e-33	2.1789e-30
GO:0019899	enzyme binding	molecular_function	6.5129e-17	7.9458e-14		GO:0070013	intracellular organelle lumen	cellular_component	1.9606e-33	2.3919e-30
GO:0048522	positive regulation of cellular process	biological_process	2.0778e-16	2.3941e-13		GO:0044237	cellular metabolic process	biological_process	4.0414e-28	4.6566e-25
GO:0044238	primary metabolic process	biological_process	2.344e-16	2.5587e-13		GO:0005488	binding	molecular_function	8.5022e-27	9.2809e-24
GO:0031974	membrane-enclosed lumen	cellular_component	2.8957e-16	3.0029e-13		GO:0071840	cellular component organization or biogenesis	biological_process	3.6983e-26	3.8351e-23
GO:0048518	positive regulation of biological process	biological_process	3.0914e-16	3.0531e-13		GO:0008152	metabolic process	biological_process	4.1649e-26	4.1134e-23
GO:0048519	negative regulation of biological process	biological_process	7.3169e-16	6.8979e-13		GO:0044444	cytoplasmic part	cellular_component	9.1655e-26	8.6405e-23
GO:0048523	negative regulation of cellular process	biological_process	1.1348e-15	1.0232e-12		GO:0016043	cellular component organization	biological_process	7.3322e-25	6.6117e-22
GO:0070013	intracellular organelle lumen	cellular_component	1.7512e-15	1.5134e-12		GO:0044260	cellular macromolecule metabolic process	biological_process	9.2071e-25	7.9565e-22
GO:0043233	organelle lumen	cellular_component	2.1635e-15	1.7949e-12		GO:0043170	macromolecule metabolic process	biological_process	7.4612e-24	6.1898e-21
GO:0044260	cellular macromolecule metabolic process	biological_process	3.1198e-15	2.4886e-12		GO:0044238	primary metabolic process	biological_process	1.2475e-23	9.9515e-21
GO:0008219	cell death	biological_process	1.7762e-14	1.3157e-11		GO:0071704	organic substance metabolic process	biological_process	2.2558e-23	1.7328e-20
GO:0016265	death	biological_process	1.7762e-14	1.3157e-11		GO:0019222	regulation of metabolic process	biological_process	2.909e-20	2.1547e-17
GO:0031981	nuclear lumen	cellular_component	2.1674e-14	1.5501e-11		GO:0060255	regulation of macromolecule metabolic process	biological_process	1.4853e-19	1.0623e-16
GO:0044428	nuclear part	cellular_component	3.382e-14	2.3381e-11		GO:0006807	nitrogen compound metabolic process	biological_process	5.1567e-19	3.565e-16
GO:0009892	negative regulation of metabolic process	biological_process	4.1909e-14	2.8039e-11		GO:0044464	cell part	cellular_component	6.0434e-19	4.0432e-16
GO:0044464	cell part	cellular_component	4.6309e-14	3.0014e-11		GO:0034641	cellular nitrogen compound metabolic process	biological_process	1.2563e-18	8.1424e-16
GO:0010604	positive regulation of macromolecule metabolic process	biological_process	5.2261e-14	3.278e-11		GO:0009987	cellular process	biological_process	1.7368e-18	1.0916e-15
GO:0019222	regulation of metabolic process	biological_process	5.3738e-14	3.278e-11		GO:0005623	cell	cellular_component	3.1172e-18	1.9015e-15
GO:0012501	programmed cell death	biological_process	6.0452e-14	3.5822e-11		GO:0031323	regulation of cellular metabolic process	biological_process	3.2646e-18	1.9345e-15
GO:0033554	cellular response to stress	biological_process	9.2396e-14	5.323e-11		GO:0080090	regulation of primary metabolic process	biological_process	1.3853e-17	7.9808e-15
GO:0005623	cell	cellular_component	1.3142e-13	7.3669e-11		GO:0044249	cellular biosynthetic process	biological_process	1.4307e-17	8.0195e-15
GO:0006793	phosphorus metabolic process	biological_process	1.5915e-13	8.6717e-11		GO:0048522	positive regulation of cellular process	biological_process	1.5211e-17	8.3022e-15
GO:0071840	cellular component organization or biogenesis	biological_process	1.6306e-13	8.6717e-11		GO:0043232	intracellular non-membrane-bounded organelle	cellular_component	2.277e-17	1.2109e-14
GO:0006915	apoptotic process	biological_process	1.9439e-13	9.8439e-11		GO:0043228	non-membrane-bounded organelle	cellular_component	2.5248e-17	1.3091e-14
GO:0006796	phosphate-containing compound metabolic process	biological_process	1.946e-13	9.8439e-11		GO:0044822	poly(A) RNA binding	molecular_function	5.7814e-17	2.9245e-14
GO:0005634	nucleus	cellular_component	2.1993e-13	1.086e-10		GO:0019899	enzyme binding	molecular_function	7.5802e-17	3.6621e-14
GO:0006807	nitrogen compound metabolic process	biological_process	2.7498e-13	1.3263e-10		GO:0033554	cellular response to stress	biological_process	7.5927e-17	3.6621e-14
GO:0010605	negative regulation of macromolecule metabolic process	biological_process	3.0505e-13	1.4379e-10		GO:0090304	nucleic acid metabolic process	biological_process	1.0636e-16	5.0137e-14
GO:0009893	positive regulation of metabolic process	biological_process	3.7573e-13	1.7129e-10		GO:0006139	nucleobase-containing compound metabolic process	biological_process	2.0363e-16	9.3853e-14
GO:0043170	macromolecule metabolic process	biological_process	3.7991e-13	1.7129e-10		GO:1901576	organic substance biosynthetic process	biological_process	2.3256e-16	1.0485e-13
GO:0060255	regulation of macromolecule metabolic process	biological_process	4.5536e-13	2.0094e-10		GO:0009058	biosynthetic process	biological_process	2.836e-16	1.2515e-13
GO:0031324	negative regulation of cellular metabolic process	biological_process	6.068e-13	2.6219e-10		GO:0048519	negative regulation of biological process	biological_process	4.2228e-16	1.8246e-13
GO:0034641	cellular nitrogen compound metabolic process	biological_process	1.059e-12	4.4825e-10		GO:0007049	cell cycle	biological_process	4.9113e-16	2.0788e-13
GO:0031323	regulation of cellular metabolic process	biological_process	1.17e-12	4.8533e-10		GO:0005829	cytosol	cellular_component	9.1403e-16	3.7914e-13
GO:0016043	cellular component organization	biological_process	1.42e-12	5.7745e-10		GO:0006725	cellular aromatic compound metabolic process	biological_process	1.0065e-15	4.0931e-13
GO:0080090	regulation of primary metabolic process	biological_process	1.6165e-12	6.4474e-10		GO:0048523	negative regulation of cellular process	biological_process	1.0738e-15	4.2829e-13
GO:0031325	positive regulation of cellular metabolic process	biological_process	1.6542e-12	6.4732e-10		GO:0009059	macromolecule biosynthetic process	biological_process	1.2438e-15	4.8673e-13
GO:0010941	regulation of cell death	biological_process	1.8653e-12	7.1641e-10		GO:0051641	cellular localization	biological_process	2.8234e-15	1.0844e-12
GO:0009987	cellular process	biological_process	2.0831e-12	7.8553e-10		GO:0010467	gene expression	biological_process	3.3849e-15	1.2764e-12
GO:0019900	kinase binding	molecular_function	2.939e-12	1.0885e-09		GO:0046483	heterocycle metabolic process	biological_process	3.9543e-15	1.4645e-12
GO:0001568	blood vessel development	biological_process	3.0526e-12	1.1107e-09		GO:0051649	establishment of localization in cell	biological_process	4.5672e-15	1.6618e-12
GO:0044249	cellular biosynthetic process	biological_process	3.1716e-12	1.1341e-09		GO:0048518	positive regulation of biological process	biological_process	1.0052e-14	3.5464e-12
GO:0005654	nucleoplasm	cellular_component	4.117e-12	1.4472e-09		GO:0034645	cellular macromolecule biosynthetic process	biological_process	1.0218e-14	3.5464e-12
GO:0043067	regulation of programmed cell death	biological_process	4.2657e-12	1.4745e-09		GO:0097159	organic cyclic compound binding	molecular_function	1.026e-14	3.5464e-12
GO:1901576	organic substance biosynthetic process	biological_process	5.5081e-12	1.8728e-09		GO:1901363	heterocyclic compound binding	molecular_function	1.1303e-14	3.8429e-12
GO:0042981	regulation of apoptotic process	biological_process	5.7065e-12	1.9089e-09		GO:1901360	organic cyclic compound metabolic process	biological_process	1.2233e-14	4.0921e-12
GO:0048514	blood vessel morphogenesis	biological_process	5.9805e-12	1.9688e-09		GO:0006996	organelle organization	biological_process	1.3607e-14	4.4794e-12
GO:0001944	vasculature development	biological_process	7.2132e-12	2.3375e-09		GO:0012505	endomembrane system	cellular_component	1.5298e-14	4.9575e-12
GO:0001525	angiogenesis	biological_process	1.0563e-11	3.3374e-09		GO:0000278	mitotic cell cycle	biological_process	1.6524e-14	5.2723e-12
GO:0070482	response to oxygen levels	biological_process	1.062e-11	3.3374e-09		GO:0010604	positive regulation of macromolecule metabolic process	biological_process	2.6015e-14	8.1751e-12
GO:0009058	biosynthetic process	biological_process	1.097e-11	3.3851e-09		GO:0044271	cellular nitrogen compound biosynthetic process	biological_process	4.8245e-14	1.4934e-11
GO:0009653	anatomical structure morphogenesis	biological_process	1.1099e-11	3.3851e-09		GO:0043933	macromolecular complex subunit organization	biological_process	5.4461e-14	1.6611e-11
GO:0072358	cardiovascular system development	biological_process	1.1719e-11	3.472e-09		GO:0046907	intracellular transport	biological_process	7.5337e-14	2.2645e-11
GO:0072359	circulatory system development	biological_process	1.1719e-11	3.472e-09		GO:0022402	cell cycle process	biological_process	2.0501e-13	6.0741e-11
GO:0036094	small molecule binding	molecular_function	1.7344e-11	5.0665e-09		GO:0044877	macromolecular complex binding	molecular_function	3.1796e-13	9.2879e-11
GO:0043168	anion binding	molecular_function	2.0256e-11	5.8348e-09		GO:0044267	cellular protein metabolic process	biological_process	3.2808e-13	9.4504e-11
GO:0044267	cellular protein metabolic process	biological_process	3.9031e-11	1.1089e-08		GO:0003676	nucleic acid binding	molecular_function	4.1165e-13	1.1695e-10
GO:0046483	heterocycle metabolic process	biological_process	5.9979e-11	1.681e-08		GO:0016070	RNA metabolic process	biological_process	4.55e-13	1.2752e-10
GO:0010557	positive regulation of macromolecule biosynthetic process	biological_process	6.6431e-11	1.837e-08		GO:1903047	mitotic cell cycle process	biological_process	5.7383e-13	1.5868e-10
GO:0070887	cellular response to chemical stimulus	biological_process	6.8631e-11	1.8729e-08		GO:0009893	positive regulation of metabolic process	biological_process	6.3718e-13	1.7388e-10
GO:0045935	positive regulation of nucleobase-containing compound metabolic process	biological_process	8.3612e-11	2.2521e-08		GO:0031325	positive regulation of cellular metabolic process	biological_process	1.1067e-12	2.9809e-10
GO:0000166	nucleotide binding	molecular_function	8.6591e-11	2.3024e-08		GO:0051171	regulation of nitrogen compound metabolic process	biological_process	1.1432e-12	3.0398e-10
GO:1901265	nucleoside phosphate binding	molecular_function	9.0538e-11	2.3769e-08		GO:0005794	Golgi apparatus	cellular_component	1.2562e-12	3.298e-10
GO:0032502	developmental process	biological_process	9.7819e-11	2.516e-08		GO:0008219	cell death	biological_process	1.5258e-12	3.8611e-10
GO:0065009	regulation of molecular function	biological_process	9.8264e-11	2.516e-08		GO:0016265	death	biological_process	1.5258e-12	3.8611e-10
GO:0051254	positive regulation of RNA metabolic process	biological_process	1.0028e-10	2.5363e-08		GO:0044427	chromosomal part	cellular_component	1.5265e-12	3.8611e-10
GO:0006139	nucleobase-containing compound metabolic process	biological_process	1.0525e-10	2.63e-08		GO:1902582	single-organism intracellular transport	biological_process	2.3915e-12	5.9759e-10
GO:0010035	response to inorganic substance	biological_process	1.0953e-10	2.7045e-08		GO:0010033	response to organic substance	biological_process	2.8527e-12	7.0434e-10
GO:0016310	phosphorylation	biological_process	1.1808e-10	2.8811e-08		GO:0050794	regulation of cellular process	biological_process	3.4315e-12	8.3728e-10
GO:0044767	single-organism developmental process	biological_process	1.5698e-10	3.7859e-08		GO:0003723	RNA binding	molecular_function	3.8199e-12	9.2121e-10
GO:0010629	negative regulation of gene expression	biological_process	1.6087e-10	3.8349e-08		GO:0070161	anchoring junction	cellular_component	3.8671e-12	9.2189e-10
GO:0048731	system development	biological_process	1.8695e-10	4.3985e-08		GO:0043412	macromolecule modification	biological_process	4.8116e-12	1.134e-09
GO:0006725	cellular aromatic compound metabolic process	biological_process	1.9033e-10	4.3985e-08		GO:0006464	cellular protein modification process	biological_process	5.7834e-12	1.3328e-09
GO:0044763	single-organism cellular process	biological_process	1.9087e-10	4.3985e-08		GO:0036211	protein modification process	biological_process	5.7834e-12	1.3328e-09
GO:0051128	regulation of cellular component organization	biological_process	1.9338e-10	4.4074e-08		GO:0003674	molecular_function	molecular_function	6.336e-12	1.4441e-09
GO:0007275	multicellular organismal development	biological_process	1.9735e-10	4.4153e-08		GO:0019438	aromatic compound biosynthetic process	biological_process	6.7815e-12	1.5288e-09
GO:1901360	organic cyclic compound metabolic process	biological_process	1.9798e-10	4.4153e-08		GO:0034654	nucleobase-containing compound biosynthetic process	biological_process	7.6874e-12	1.7141e-09
GO:0019901	protein kinase binding	molecular_function	2.332e-10	5.1452e-08		GO:0051276	chromosome organization	biological_process	7.7687e-12	1.7141e-09
GO:0051173	positive regulation of nitrogen compound metabolic process	biological_process	2.4131e-10	5.2682e-08		GO:0018130	heterocycle biosynthetic process	biological_process	8.237e-12	1.789e-09
GO:0010033	response to organic substance	biological_process	2.9948e-10	6.4701e-08		GO:0005912	adherens junction	cellular_component	8.2809e-12	1.789e-09
GO:0051246	regulation of protein metabolic process	biological_process	3.2161e-10	6.8765e-08		GO:0019538	protein metabolic process	biological_process	8.9832e-12	1.9207e-09
GO:0032268	regulation of cellular protein metabolic process	biological_process	3.682e-10	7.7923e-08		GO:0009892	negative regulation of metabolic process	biological_process	1.0497e-11	2.2216e-09
GO:0017076	purine nucleotide binding	molecular_function	3.9465e-10	8.2678e-08		GO:0010468	regulation of gene expression	biological_process	1.0726e-11	2.2471e-09
GO:0032555	purine ribonucleotide binding	molecular_function	4.0005e-10	8.2971e-08		GO:0006915	apoptotic process	biological_process	1.2252e-11	2.541e-09
GO:0070161	anchoring junction	cellular_component	4.2414e-10	8.7097e-08		GO:0031090	organelle membrane	cellular_component	1.3088e-11	2.6875e-09
GO:0036293	response to decreased oxygen levels	biological_process	4.5817e-10	9.3161e-08		GO:0012501	programmed cell death	biological_process	1.5439e-11	3.1393e-09
GO:0006950	response to stress	biological_process	5.5081e-10	1.1091e-07		GO:0019219	regulation of nucleobase-containing compound metabolic process	biological_process	1.6641e-11	3.3508e-09
GO:0009966	regulation of signal transduction	biological_process	5.6183e-10	1.1204e-07		GO:0006260	DNA replication	biological_process	1.7216e-11	3.4332e-09
GO:0009891	positive regulation of biosynthetic process	biological_process	5.8668e-10	1.1493e-07		GO:0051128	regulation of cellular component organization	biological_process	1.982e-11	3.915e-09
GO:0031328	positive regulation of cellular biosynthetic process	biological_process	5.8741e-10	1.1493e-07		GO:0005694	chromosome	cellular_component	2.4173e-11	4.7297e-09
GO:0019538	protein metabolic process	biological_process	6.1351e-10	1.1892e-07		GO:0065003	macromolecular complex assembly	biological_process	2.9589e-11	5.7352e-09
GO:1901363	heterocyclic compound binding	molecular_function	6.34e-10	1.2062e-07		GO:1901362	organic cyclic compound biosynthetic process	biological_process	3.2053e-11	6.1553e-09
GO:0001666	response to hypoxia	biological_process	6.3407e-10	1.2062e-07		GO:0050789	regulation of biological process	biological_process	3.9427e-11	7.5019e-09
GO:0032553	ribonucleotide binding	molecular_function	6.3975e-10	1.2062e-07		GO:0010605	negative regulation of macromolecule metabolic process	biological_process	4.1253e-11	7.7781e-09
GO:0008134	transcription factor binding	molecular_function	7.1787e-10	1.3413e-07		GO:0044085	cellular component biogenesis	biological_process	4.8157e-11	8.998e-09
GO:0005912	adherens junction	cellular_component	7.6084e-10	1.4089e-07		GO:0006950	response to stress	biological_process	5.8311e-11	1.0798e-08
GO:0044710	single-organism metabolic process	biological_process	8.519e-10	1.5636e-07		GO:0010556	regulation of macromolecule biosynthetic process	biological_process	6.6325e-11	1.2173e-08
GO:0009894	regulation of catabolic process	biological_process	1.0624e-09	1.9328e-07		GO:0051726	regulation of cell cycle	biological_process	8.1401e-11	1.4629e-08
GO:0097159	organic cyclic compound binding	molecular_function	1.153e-09	2.0795e-07		GO:0097659	nucleic acid-templated transcription	biological_process	8.1447e-11	1.4629e-08
GO:0006979	response to oxidative stress	biological_process	1.1917e-09	2.1306e-07		GO:0005925	focal adhesion	cellular_component	8.1819e-11	1.4629e-08
GO:0048856	anatomical structure development	biological_process	1.2418e-09	2.2013e-07		GO:0005924	cell-substrate adherens junction	cellular_component	1.3595e-10	2.4099e-08
GO:0010646	regulation of cell communication	biological_process	1.3135e-09	2.3086e-07		GO:0006261	DNA-dependent DNA replication	biological_process	1.4535e-10	2.5546e-08
GO:0050793	regulation of developmental process	biological_process	1.4511e-09	2.5291e-07		GO:0030055	cell-substrate junction	cellular_component	1.6212e-10	2.8255e-08
GO:0010628	positive regulation of gene expression	biological_process	1.4879e-09	2.5716e-07		GO:0031326	regulation of cellular biosynthetic process	biological_process	1.8515e-10	3.2001e-08
GO:0046034	ATP metabolic process	biological_process	1.5734e-09	2.697e-07		GO:0006351	transcription, DNA-templated	biological_process	1.9252e-10	3.2999e-08
GO:0001882	nucleoside binding	molecular_function	1.6302e-09	2.7713e-07		GO:0032774	RNA biosynthetic process	biological_process	2.1367e-10	3.6272e-08
GO:0035639	purine ribonucleoside triphosphate binding	molecular_function	1.7206e-09	2.9012e-07		GO:0051246	regulation of protein metabolic process	biological_process	2.1511e-10	3.6272e-08
GO:0050794	regulation of cellular process	biological_process	1.8345e-09	3.0684e-07		GO:0065007	biological regulation	biological_process	2.2291e-10	3.7284e-08
GO:0023051	regulation of signaling	biological_process	1.8999e-09	3.146e-07		GO:0071822	protein complex subunit organization	biological_process	2.2842e-10	3.79e-08
GO:0043068	positive regulation of programmed cell death	biological_process	1.9113e-09	3.146e-07		GO:0009889	regulation of biosynthetic process	biological_process	2.7873e-10	4.588e-08
GO:1902680	positive regulation of RNA biosynthetic process	biological_process	1.946e-09	3.1779e-07		GO:2000112	regulation of cellular macromolecule biosynthetic process	biological_process	3.0217e-10	4.9347e-08
GO:0071310	cellular response to organic substance	biological_process	1.964e-09	3.1807e-07		GO:0051252	regulation of RNA metabolic process	biological_process	3.1536e-10	5.1098e-08
GO:0044699	single-organism process	biological_process	1.9906e-09	3.1807e-07		GO:0031324	negative regulation of cellular metabolic process	biological_process	4.2752e-10	6.8735e-08
GO:0044271	cellular nitrogen compound biosynthetic process	biological_process	1.9937e-09	3.1807e-07		GO:0008150	biological_process	biological_process	6.9252e-10	1.1048e-07
GO:0032550	purine ribonucleoside binding	molecular_function	2.0163e-09	3.1863e-07		GO:0032502	developmental process	biological_process	6.9951e-10	1.1075e-07
GO:0014070	response to organic cyclic compound	biological_process	2.0279e-09	3.1863e-07		GO:0019900	kinase binding	molecular_function	7.1936e-10	1.1303e-07
GO:0009205	purine ribonucleoside triphosphate metabolic process	biological_process	2.1825e-09	3.4034e-07		GO:0006461	protein complex assembly	biological_process	1.0236e-09	1.5844e-07
GO:0001883	purine nucleoside binding	molecular_function	2.3616e-09	3.6552e-07		GO:0070271	protein complex biogenesis	biological_process	1.0236e-09	1.5844e-07
GO:0032549	ribonucleoside binding	molecular_function	2.4251e-09	3.7257e-07		GO:0009653	anatomical structure morphogenesis	biological_process	1.3153e-09	2.0207e-07
GO:0045893	positive regulation of transcription, DNA-templated	biological_process	2.5294e-09	3.8292e-07		GO:0010941	regulation of cell death	biological_process	1.6733e-09	2.5519e-07
GO:1903508	positive regulation of nucleic acid-templated transcription	biological_process	2.5294e-09	3.8292e-07		GO:0044767	single-organism developmental process	biological_process	1.767e-09	2.6749e-07
GO:0010942	positive regulation of cell death	biological_process	2.6045e-09	3.9143e-07		GO:0071310	cellular response to organic substance	biological_process	2.0148e-09	3.028e-07
GO:0032269	negative regulation of cellular protein metabolic process	biological_process	2.7689e-09	4.1314e-07		GO:0032268	regulation of cellular protein metabolic process	biological_process	2.1601e-09	3.2231e-07
GO:0010648	negative regulation of cell communication	biological_process	2.913e-09	4.3153e-07		GO:0000228	nuclear chromosome	cellular_component	2.2106e-09	3.2749e-07
GO:0097367	carbohydrate derivative binding	molecular_function	2.9484e-09	4.3369e-07		GO:0009057	macromolecule catabolic process	biological_process	2.3783e-09	3.4982e-07
GO:0030554	adenyl nucleotide binding	molecular_function	3.1885e-09	4.657e-07		GO:0006366	transcription from RNA polymerase II promoter	biological_process	3.2607e-09	4.7624e-07
GO:0044822	poly(A) RNA binding	molecular_function	3.25e-09	4.7136e-07		GO:0022607	cellular component assembly	biological_process	3.339e-09	4.8427e-07
GO:0010467	gene expression	biological_process	3.3908e-09	4.8837e-07		GO:0032403	protein complex binding	molecular_function	3.6919e-09	5.3174e-07
GO:0032559	adenyl ribonucleotide binding	molecular_function	3.6411e-09	5.2081e-07		GO:0006259	DNA metabolic process	biological_process	3.756e-09	5.3724e-07
GO:0051172	negative regulation of nitrogen compound metabolic process	biological_process	3.6913e-09	5.2437e-07		GO:0006396	RNA processing	biological_process	4.2471e-09	6.0332e-07
GO:0043065	positive regulation of apoptotic process	biological_process	3.9742e-09	5.6071e-07		GO:0007275	multicellular organismal development	biological_process	4.4289e-09	6.2486e-07
GO:0003674	molecular_function	molecular_function	5.2342e-09	7.3349e-07		GO:0051173	positive regulation of nitrogen compound metabolic process	biological_process	5.0438e-09	7.0681e-07
GO:0006464	cellular protein modification process	biological_process	5.5844e-09	7.7213e-07		GO:0032991	macromolecular complex	cellular_component	5.3558e-09	7.455e-07
GO:0036211	protein modification process	biological_process	5.5844e-09	7.7213e-07		GO:0051656	establishment of organelle localization	biological_process	5.5724e-09	7.7047e-07
GO:0023057	negative regulation of signaling	biological_process	5.9309e-09	8.1461e-07		GO:0048856	anatomical structure development	biological_process	5.6773e-09	7.7978e-07
GO:0009199	ribonucleoside triphosphate metabolic process	biological_process	6.2544e-09	8.4518e-07		GO:0098588	bounding membrane of organelle	cellular_component	5.8734e-09	8.0141e-07
GO:0061615	glycolytic process through fructose-6-phosphate	biological_process	6.2757e-09	8.4518e-07		GO:0006397	mRNA processing	biological_process	6.3453e-09	8.6014e-07
GO:0061620	glycolytic process through glucose-6-phosphate	biological_process	6.2757e-09	8.4518e-07		GO:0070887	cellular response to chemical stimulus	biological_process	6.4878e-09	8.7375e-07
GO:0048646	anatomical structure formation involved in morphogenesis	biological_process	6.6817e-09	8.9405e-07		GO:0051179	localization	biological_process	7.894e-09	1.0563e-06
GO:0051248	negative regulation of protein metabolic process	biological_process	7.0116e-09	9.3218e-07		GO:0044454	nuclear chromosome part	cellular_component	8.4351e-09	1.1214e-06
GO:0009144	purine nucleoside triphosphate metabolic process	biological_process	7.1281e-09	9.4164e-07		GO:1902589	single-organism organelle organization	biological_process	1.0593e-08	1.3994e-06
GO:0034645	cellular macromolecule biosynthetic process	biological_process	9.8552e-09	1.2937e-06		GO:0031975	envelope	cellular_component	1.0804e-08	1.4182e-06
GO:0051171	regulation of nitrogen compound metabolic process	biological_process	1.0089e-08	1.3155e-06		GO:0050684	regulation of mRNA processing	biological_process	1.1515e-08	1.5021e-06
GO:0009896	positive regulation of catabolic process	biological_process	1.0175e-08	1.3155e-06		GO:0031967	organelle envelope	cellular_component	1.1649e-08	1.51e-06
GO:0071453	cellular response to oxygen levels	biological_process	1.0212e-08	1.3155e-06		GO:0033036	macromolecule localization	biological_process	1.2386e-08	1.5955e-06
GO:0050789	regulation of biological process	biological_process	1.0353e-08	1.3254e-06		GO:0009056	catabolic process	biological_process	1.2612e-08	1.6146e-06
GO:0036294	cellular response to decreased oxygen levels	biological_process	1.1091e-08	1.4112e-06		GO:2001141	regulation of RNA biosynthetic process	biological_process	1.3118e-08	1.6691e-06
GO:0009059	macromolecule biosynthetic process	biological_process	1.238e-08	1.5657e-06		GO:0044710	single-organism metabolic process	biological_process	1.3656e-08	1.7269e-06
GO:0010558	negative regulation of macromolecule biosynthetic process	biological_process	1.4375e-08	1.8069e-06		GO:0016482	cytoplasmic transport	biological_process	1.4752e-08	1.8469e-06
GO:0043412	macromolecule modification	biological_process	1.4606e-08	1.8249e-06		GO:0000166	nucleotide binding	molecular_function	1.4782e-08	1.8469e-06
GO:0005524	ATP binding	molecular_function	1.4937e-08	1.855e-06		GO:1903506	regulation of nucleic acid-templated transcription	biological_process	1.5359e-08	1.9075e-06
GO:0065007	biological regulation	biological_process	1.9055e-08	2.3524e-06		GO:1901265	nucleoside phosphate binding	molecular_function	1.5534e-08	1.9177e-06
GO:0006366	transcription from RNA polymerase II promoter	biological_process	1.9801e-08	2.43e-06		GO:0000375	RNA splicing, via transesterification reactions	biological_process	1.7916e-08	2.1803e-06
GO:0071456	cellular response to hypoxia	biological_process	2.2623e-08	2.76e-06		GO:0005856	cytoskeleton	cellular_component	1.7974e-08	2.1803e-06
GO:0006091	generation of precursor metabolites and energy	biological_process	2.285e-08	2.7699e-06		GO:0000377	RNA splicing, via transesterification reactions with bulged adenosine as nucleophile	biological_process	1.8082e-08	2.1803e-06
GO:0000302	response to reactive oxygen species	biological_process	2.2972e-08	2.7699e-06		GO:0000398	mRNA splicing, via spliceosome	biological_process	1.8082e-08	2.1803e-06
GO:0006006	glucose metabolic process	biological_process	2.4843e-08	2.9783e-06		GO:1902580	single-organism cellular localization	biological_process	1.8536e-08	2.2127e-06
GO:0051726	regulation of cell cycle	biological_process	2.5931e-08	3.0909e-06		GO:0043067	regulation of programmed cell death	biological_process	1.8564e-08	2.2127e-06
GO:0045595	regulation of cell differentiation	biological_process	2.64e-08	3.1287e-06		GO:1901700	response to oxygen-containing compound	biological_process	1.8683e-08	2.2142e-06
GO:0009968	negative regulation of signal transduction	biological_process	2.781e-08	3.2772e-06		GO:0044451	nucleoplasm part	cellular_component	1.9752e-08	2.3276e-06
GO:0006090	pyruvate metabolic process	biological_process	2.9247e-08	3.427e-06		GO:0016049	cell growth	biological_process	2.0266e-08	2.3746e-06
GO:0031327	negative regulation of cellular biosynthetic process	biological_process	2.9436e-08	3.4297e-06		GO:0032446	protein modification by small protein conjugation	biological_process	2.0506e-08	2.3893e-06
GO:0031331	positive regulation of cellular catabolic process	biological_process	3.3562e-08	3.8593e-06		GO:0042981	regulation of apoptotic process	biological_process	2.0781e-08	2.4078e-06
GO:0006735	NADH regeneration	biological_process	3.3866e-08	3.8593e-06		GO:0071103	DNA conformation change	biological_process	2.164e-08	2.4934e-06
GO:0061621	canonical glycolysis	biological_process	3.3866e-08	3.8593e-06		GO:0070647	protein modification by small protein conjugation or removal	biological_process	2.2261e-08	2.5508e-06
GO:0061718	glucose catabolic process to pyruvate	biological_process	3.3866e-08	3.8593e-06		GO:0003682	chromatin binding	molecular_function	3.2315e-08	3.6825e-06
GO:0048585	negative regulation of response to stimulus	biological_process	3.4665e-08	3.9287e-06		GO:0051640	organelle localization	biological_process	3.5663e-08	4.0418e-06
GO:0048513	organ development	biological_process	3.6005e-08	4.0584e-06		GO:0015630	microtubule cytoskeleton	cellular_component	3.7371e-08	4.2123e-06
GO:0010556	regulation of macromolecule biosynthetic process	biological_process	3.811e-08	4.2725e-06		GO:0010557	positive regulation of macromolecule biosynthetic process	biological_process	3.7954e-08	4.2549e-06
GO:2000113	negative regulation of cellular macromolecule biosynthetic process	biological_process	3.8884e-08	4.3358e-06		GO:0006355	regulation of transcription, DNA-templated	biological_process	3.8368e-08	4.2783e-06
GO:2000112	regulation of cellular macromolecule biosynthetic process	biological_process	4.4867e-08	4.9762e-06		GO:0006974	cellular response to DNA damage stimulus	biological_process	3.8589e-08	4.2799e-06
GO:0019674	NAD metabolic process	biological_process	4.5574e-08	5.0277e-06		GO:0010629	negative regulation of gene expression	biological_process	3.9951e-08	4.4074e-06
GO:1901564	organonitrogen compound metabolic process	biological_process	4.736e-08	5.1971e-06		GO:0051247	positive regulation of protein metabolic process	biological_process	4.2554e-08	4.6697e-06
GO:0050896	response to stimulus	biological_process	4.9657e-08	5.4204e-06		GO:0019904	protein domain specific binding	molecular_function	4.9258e-08	5.3769e-06
GO:0048583	regulation of response to stimulus	biological_process	5.0303e-08	5.4622e-06		GO:0050839	cell adhesion molecule binding	molecular_function	5.1041e-08	5.5423e-06
GO:0006996	organelle organization	biological_process	5.216e-08	5.6343e-06		GO:0035556	intracellular signal transduction	biological_process	5.491e-08	5.9314e-06
GO:0051253	negative regulation of RNA metabolic process	biological_process	5.3377e-08	5.736e-06		GO:0006796	phosphate-containing compound metabolic process	biological_process	5.685e-08	6.1092e-06
GO:0051239	regulation of multicellular organismal process	biological_process	5.4456e-08	5.8218e-06		GO:0006793	phosphorus metabolic process	biological_process	5.7911e-08	6.1911e-06
GO:0031329	regulation of cellular catabolic process	biological_process	5.5692e-08	5.9233e-06		GO:1903311	regulation of mRNA metabolic process	biological_process	6.0965e-08	6.4842e-06
GO:0042326	negative regulation of phosphorylation	biological_process	6.0208e-08	6.3471e-06		GO:0045935	positive regulation of nucleobase-containing compound metabolic process	biological_process	6.4039e-08	6.7764e-06
GO:0006096	glycolytic process	biological_process	6.0577e-08	6.3471e-06		GO:1901575	organic substance catabolic process	biological_process	6.7897e-08	7.1049e-06
GO:0006357	regulation of transcription from RNA polymerase II promoter	biological_process	6.0595e-08	6.3471e-06		GO:0030163	protein catabolic process	biological_process	6.8041e-08	7.1049e-06
GO:0045934	negative regulation of nucleobase-containing compound metabolic process	biological_process	6.2039e-08	6.4658e-06		GO:0016071	mRNA metabolic process	biological_process	6.8171e-08	7.1049e-06
GO:0044711	single-organism biosynthetic process	biological_process	6.3971e-08	6.6338e-06		GO:0051248	negative regulation of protein metabolic process	biological_process	6.9375e-08	7.1941e-06
GO:0031326	regulation of cellular biosynthetic process	biological_process	6.5472e-08	6.7557e-06		GO:0019901	protein kinase binding	molecular_function	8.448e-08	8.7009e-06
GO:0010468	regulation of gene expression	biological_process	6.8343e-08	7.017e-06		GO:0051130	positive regulation of cellular component organization	biological_process	8.4744e-08	8.7009e-06
GO:0019318	hexose metabolic process	biological_process	6.9234e-08	7.0735e-06		GO:0003824	catalytic activity	molecular_function	8.711e-08	8.8998e-06
GO:0019637	organophosphate metabolic process	biological_process	7.0197e-08	7.1367e-06		GO:0005730	nucleolus	cellular_component	9.129e-08	9.2811e-06
GO:0019219	regulation of nucleobase-containing compound metabolic process	biological_process	7.7486e-08	7.8393e-06		GO:0070727	cellular macromolecule localization	biological_process	9.3412e-08	9.4506e-06
GO:0050790	regulation of catalytic activity	biological_process	8.0543e-08	8.1091e-06		GO:0005575	cellular_component	cellular_component	9.4049e-08	9.4688e-06
GO:0051338	regulation of transferase activity	biological_process	8.6328e-08	8.6495e-06		0000184828,ENSG00000119917,ENSG00000108175,ENSG00000075223,ENSG00000150540,ENSG00000171488,ENSG00000132436,ENSG00000125266,ENSG00000100281,ENSG00000156875,ENSG00000197457,ENSG00000109475,ENSG00000143554,ENSG00000119138,ENSG00000136827,ENSG00000158062
GO:0033993	response to lipid	biological_process	8.7489e-08	8.7236e-06		GO:0044770	cell cycle phase transition	biological_process	9.6797e-08	9.6984e-06
GO:0006757	ATP generation from ADP	biological_process	8.8425e-08	8.7748e-06		GO:0007346	regulation of mitotic cell cycle	biological_process	9.7288e-08	9.7007e-06
GO:0046939	nucleotide phosphorylation	biological_process	9.0337e-08	8.9218e-06		GO:0010628	positive regulation of gene expression	biological_process	1.0496e-07	1.0415e-05
GO:0005996	monosaccharide metabolic process	biological_process	9.2958e-08	9.1372e-06		GO:0044763	single-organism cellular process	biological_process	1.0573e-07	1.0442e-05
GO:0006007	glucose catabolic process	biological_process	9.4662e-08	9.2608e-06		GO:0001558	regulation of cell growth	biological_process	1.0772e-07	1.0588e-05
GO:0009890	negative regulation of biosynthetic process	biological_process	9.5488e-08	9.2855e-06		GO:0036094	small molecule binding	molecular_function	1.1652e-07	1.1399e-05
GO:1902679	negative regulation of RNA biosynthetic process	biological_process	9.6084e-08	9.2855e-06		GO:0034613	cellular protein localization	biological_process	1.1876e-07	1.1563e-05
GO:0048732	gland development	biological_process	9.6258e-08	9.2855e-06		GO:0009966	regulation of signal transduction	biological_process	1.2163e-07	1.1788e-05
GO:0090304	nucleic acid metabolic process	biological_process	9.9088e-08	9.5143e-06		GO:0005635	nuclear envelope	cellular_component	1.2617e-07	1.2149e-05
GO:0030154	cell differentiation	biological_process	1.0434e-07	9.9724e-06		GO:0045786	negative regulation of cell cycle	biological_process	1.2653e-07	1.2149e-05
GO:0009141	nucleoside triphosphate metabolic process	biological_process	1.0572e-07	1.0058e-05		GO:0051254	positive regulation of RNA metabolic process	biological_process	1.4411e-07	1.3773e-05
GO:0009889	regulation of biosynthetic process	biological_process	1.0676e-07	1.0111e-05		GO:0032270	positive regulation of cellular protein metabolic process	biological_process	1.5903e-07	1.513e-05
GO:0008283	cell proliferation	biological_process	1.1398e-07	1.0746e-05		GO:0044431	Golgi apparatus part	cellular_component	1.7286e-07	1.6371e-05
GO:0044281	small molecule metabolic process	biological_process	1.1481e-07	1.0775e-05		GO:0009894	regulation of catabolic process	biological_process	1.7407e-07	1.641e-05
GO:0009167	purine ribonucleoside monophosphate metabolic process	biological_process	1.1665e-07	1.0898e-05		GO:0051169	nuclear transport	biological_process	1.8213e-07	1.7092e-05
GO:0097190	apoptotic signaling pathway	biological_process	1.1917e-07	1.1084e-05		GO:0072358	cardiovascular system development	biological_process	1.8435e-07	1.7146e-05
GO:0006165	nucleoside diphosphate phosphorylation	biological_process	1.2346e-07	1.142e-05		GO:0072359	circulatory system development	biological_process	1.8435e-07	1.7146e-05
GO:0001933	negative regulation of protein phosphorylation	biological_process	1.2409e-07	1.142e-05		GO:0044248	cellular catabolic process	biological_process	1.902e-07	1.7611e-05
GO:0042542	response to hydrogen peroxide	biological_process	1.2444e-07	1.142e-05		GO:0044699	single-organism process	biological_process	2.0579e-07	1.897e-05
GO:0009126	purine nucleoside monophosphate metabolic process	biological_process	1.327e-07	1.2124e-05		GO:0030054	cell junction	cellular_component	2.2101e-07	2.0282e-05
GO:1901575	organic substance catabolic process	biological_process	1.3744e-07	1.2503e-05		GO:0051168	nuclear export	biological_process	2.2659e-07	2.0703e-05
GO:0003824	catalytic activity	molecular_function	1.6968e-07	1.5368e-05		GO:0010942	positive regulation of cell death	biological_process	2.2848e-07	2.0784e-05
GO:0051179	localization	biological_process	1.7152e-07	1.5467e-05		GO:0040007	growth	biological_process	2.4287e-07	2.1996e-05
GO:0044092	negative regulation of molecular function	biological_process	1.7603e-07	1.5805e-05		GO:0031124	mRNA 3'-end processing	biological_process	2.6114e-07	2.3548e-05
GO:0051716	cellular response to stimulus	biological_process	1.7864e-07	1.597e-05		GO:0030198	extracellular matrix organization	biological_process	2.7228e-07	2.4446e-05
GO:0003723	RNA binding	molecular_function	1.8181e-07	1.6183e-05		GO:0044843	cell cycle G1/S phase transition	biological_process	2.8181e-07	2.5193e-05
GO:0071407	cellular response to organic cyclic compound	biological_process	1.8992e-07	1.6833e-05		GO:0031328	positive regulation of cellular biosynthetic process	biological_process	2.8784e-07	2.5621e-05
GO:0005739	mitochondrion	cellular_component	2.0161e-07	1.7793e-05		GO:0009719	response to endogenous stimulus	biological_process	2.9957e-07	2.6551e-05
GO:1903507	negative regulation of nucleic acid-templated transcription	biological_process	2.1027e-07	1.8479e-05		GO:2000113	negative regulation of cellular macromolecule biosynthetic process	biological_process	3.1889e-07	2.8144e-05
GO:0009719	response to endogenous stimulus	biological_process	2.1357e-07	1.869e-05		GO:0043062	extracellular structure organization	biological_process	3.2865e-07	2.8882e-05
GO:0043232	intracellular non-membrane-bounded organelle	cellular_component	2.1609e-07	1.8831e-05		GO:0008380	RNA splicing	biological_process	3.3042e-07	2.8915e-05
GO:0043228	non-membrane-bounded organelle	cellular_component	2.2581e-07	1.9596e-05		GO:0010646	regulation of cell communication	biological_process	3.7235e-07	3.2323e-05
GO:0046031	ADP metabolic process	biological_process	2.4148e-07	2.0868e-05		GO:0033993	response to lipid	biological_process	3.7248e-07	3.2323e-05
GO:0009161	ribonucleoside monophosphate metabolic process	biological_process	2.4822e-07	2.1361e-05		GO:0043065	positive regulation of apoptotic process	biological_process	3.7725e-07	3.2601e-05
GO:0007049	cell cycle	biological_process	2.6491e-07	2.2703e-05		GO:0048583	regulation of response to stimulus	biological_process	3.8831e-07	3.3417e-05
GO:0031400	negative regulation of protein modification process	biological_process	2.8796e-07	2.4578e-05		GO:0070062	extracellular exosome	cellular_component	4.4016e-07	3.7722e-05
GO:0006468	protein phosphorylation	biological_process	3.3458e-07	2.8439e-05		GO:0065009	regulation of molecular function	biological_process	4.4481e-07	3.7965e-05
GO:0045892	negative regulation of transcription, DNA-templated	biological_process	3.9528e-07	3.3462e-05		GO:1903561	extracellular vesicle	cellular_component	4.6158e-07	3.9101e-05
GO:0060548	negative regulation of cell death	biological_process	4.0821e-07	3.4376e-05		GO:0065010	extracellular membrane-bounded organelle	cellular_component	4.619e-07	3.9101e-05
GO:1901700	response to oxygen-containing compound	biological_process	4.094e-07	3.4376e-05		GO:0006913	nucleocytoplasmic transport	biological_process	5.2308e-07	4.3978e-05
GO:0010038	response to metal ion	biological_process	4.3199e-07	3.6127e-05		GO:0098687	chromosomal region	cellular_component	5.2375e-07	4.3978e-05
GO:0071363	cellular response to growth factor stimulus	biological_process	4.5628e-07	3.8005e-05		GO:0031123	RNA 3'-end processing	biological_process	5.301e-07	4.4331e-05
GO:0008150	biological_process	biological_process	4.7563e-07	3.9458e-05		GO:0048731	system development	biological_process	5.8613e-07	4.882e-05
GO:0051186	cofactor metabolic process	biological_process	4.9079e-07	4.0554e-05		GO:0044772	mitotic cell cycle phase transition	biological_process	6.2133e-07	5.1546e-05
GO:0051098	regulation of binding	biological_process	5.005e-07	4.1192e-05		GO:0043230	extracellular organelle	cellular_component	6.5194e-07	5.3869e-05
GO:0040012	regulation of locomotion	biological_process	6.2784e-07	5.1468e-05		GO:0009891	positive regulation of biosynthetic process	biological_process	6.8862e-07	5.6674e-05
GO:0042221	response to chemical	biological_process	8.3658e-07	6.831e-05		GO:0003677	DNA binding	molecular_function	7.3039e-07	5.9874e-05
GO:0071900	regulation of protein serine/threonine kinase activity	biological_process	8.873e-07	7.2167e-05		GO:0006270	DNA replication initiation	biological_process	7.5616e-07	6.1743e-05
GO:0009888	tissue development	biological_process	9.0454e-07	7.3282e-05		GO:0008104	protein localization	biological_process	8.3671e-07	6.8052e-05
GO:0034599	cellular response to oxidative stress	biological_process	9.2677e-07	7.479e-05		GO:1901701	cellular response to oxygen-containing compound	biological_process	9.1047e-07	7.3762e-05
GO:0042278	purine nucleoside metabolic process	biological_process	1.0403e-06	8.363e-05		GO:0010948	negative regulation of cell cycle process	biological_process	1.0501e-06	8.4745e-05
GO:0072524	pyridine-containing compound metabolic process	biological_process	1.1133e-06	8.9154e-05		GO:0032269	negative regulation of cellular protein metabolic process	biological_process	1.0602e-06	8.5231e-05
GO:0009123	nucleoside monophosphate metabolic process	biological_process	1.1417e-06	9.1069e-05		GO:0043068	positive regulation of programmed cell death	biological_process	1.1164e-06	8.94e-05
GO:0098631	protein binding involved in cell adhesion	molecular_function	1.1813e-06	9.3872e-05		GO:0051234	establishment of localization	biological_process	1.1489e-06	9.1645e-05
GO:0042176	regulation of protein catabolic process	biological_process	1.251e-06	9.9031e-05		GO:0098631	protein binding involved in cell adhesion	molecular_function	1.2323e-06	9.7751e-05
GO:0001503	ossification	biological_process	1.276e-06	0.00010062		GO:0016568	chromatin modification	biological_process	1.2348e-06	9.7751e-05
GO:0045859	regulation of protein kinase activity	biological_process	1.2829e-06	0.00010079		GO:0000139	Golgi membrane	cellular_component	1.2498e-06	9.8562e-05
GO:0019362	pyridine nucleotide metabolic process	biological_process	1.3618e-06	0.00010618		GO:0051028	mRNA transport	biological_process	1.3481e-06	0.00010591
GO:0046496	nicotinamide nucleotide metabolic process	biological_process	1.3618e-06	0.00010618		GO:0031965	nuclear membrane	cellular_component	1.4957e-06	0.00011706
GO:0070301	cellular response to hydrogen peroxide	biological_process	1.3812e-06	0.00010729		GO:0045930	negative regulation of mitotic cell cycle	biological_process	1.5017e-06	0.00011709
GO:0006734	NADH metabolic process	biological_process	1.4413e-06	0.00011154		GO:0051172	negative regulation of nitrogen compound metabolic process	biological_process	1.6832e-06	0.00013075
GO:0046128	purine ribonucleoside metabolic process	biological_process	1.552e-06	0.00011966		GO:0051338	regulation of transferase activity	biological_process	1.8486e-06	0.00014306
GO:0008285	negative regulation of cell proliferation	biological_process	1.644e-06	0.00012629		GO:0042176	regulation of protein catabolic process	biological_process	2.0289e-06	0.00015643
GO:0043066	negative regulation of apoptotic process	biological_process	1.7421e-06	0.00013333		GO:0010564	regulation of cell cycle process	biological_process	2.0868e-06	0.0001603
GO:0007166	cell surface receptor signaling pathway	biological_process	1.7826e-06	0.00013546		GO:0016604	nuclear body	cellular_component	2.1133e-06	0.00016174
GO:0010563	negative regulation of phosphorus metabolic process	biological_process	1.7895e-06	0.00013546		GO:0016032	viral process	biological_process	2.1465e-06	0.00016367
GO:0045936	negative regulation of phosphate metabolic process	biological_process	1.7895e-06	0.00013546		GO:0005815	microtubule organizing center	cellular_component	2.1712e-06	0.00016495
GO:0043069	negative regulation of programmed cell death	biological_process	1.8077e-06	0.00013633		GO:1903827	regulation of cellular protein localization	biological_process	2.4145e-06	0.00018276
GO:0001889	liver development	biological_process	1.907e-06	0.0001433		GO:0006357	regulation of transcription from RNA polymerase II promoter	biological_process	2.5713e-06	0.00019392
GO:0001101	response to acid chemical	biological_process	1.9517e-06	0.00014613		GO:0009888	tissue development	biological_process	2.596e-06	0.00019508
GO:0006733	oxidoreduction coenzyme metabolic process	biological_process	2.0018e-06	0.00014934		GO:0023051	regulation of signaling	biological_process	2.68e-06	0.00020066
GO:0044723	single-organism carbohydrate metabolic process	biological_process	2.0133e-06	0.00014966		GO:0016310	phosphorylation	biological_process	2.7385e-06	0.0002043
GO:0000122	negative regulation of transcription from RNA polymerase II promoter	biological_process	2.1466e-06	0.000159		GO:0000075	cell cycle checkpoint	biological_process	2.7753e-06	0.00020574
GO:2000026	regulation of multicellular organismal development	biological_process	2.2178e-06	0.00016369		GO:0043234	protein complex	cellular_component	2.7858e-06	0.00020574
GO:0070848	response to growth factor	biological_process	2.3236e-06	0.00017089		GO:0031327	negative regulation of cellular biosynthetic process	biological_process	2.7876e-06	0.00020574
GO:0043167	ion binding	molecular_function	2.3608e-06	0.00017302		GO:0050840	extracellular matrix binding	molecular_function	2.8251e-06	0.00020777
GO:0018130	heterocycle biosynthetic process	biological_process	2.4704e-06	0.00018041		GO:0071407	cellular response to organic cyclic compound	biological_process	2.8631e-06	0.00020982
GO:0009185	ribonucleoside diphosphate metabolic process	biological_process	2.5118e-06	0.00018279		GO:1902680	positive regulation of RNA biosynthetic process	biological_process	2.8981e-06	0.00021164
GO:0071495	cellular response to endogenous stimulus	biological_process	2.6704e-06	0.00019365		GO:0010558	negative regulation of macromolecule biosynthetic process	biological_process	3.1825e-06	0.0002316
GO:0005925	focal adhesion	cellular_component	2.7733e-06	0.00020041		GO:0006403	RNA localization	biological_process	3.2705e-06	0.00023717
GO:0098632	protein binding involved in cell-cell adhesion	molecular_function	2.7983e-06	0.00020152		GO:0045184	establishment of protein localization	biological_process	3.3086e-06	0.0002391
GO:0046685	response to arsenic-containing substance	biological_process	2.8412e-06	0.00020389		GO:1901987	regulation of cell cycle phase transition	biological_process	3.6194e-06	0.00026025
GO:0035556	intracellular signal transduction	biological_process	3.0839e-06	0.00022056		GO:0044764	multi-organism cellular process	biological_process	3.6265e-06	0.00026025
GO:0098641	cadherin binding involved in cell-cell adhesion	molecular_function	3.1431e-06	0.00022401		GO:0098632	protein binding involved in cell-cell adhesion	molecular_function	3.7014e-06	0.00026471
GO:0019438	aromatic compound biosynthetic process	biological_process	3.4634e-06	0.00024485		GO:0000082	G1/S transition of mitotic cell cycle	biological_process	3.8148e-06	0.00027189
GO:1902531	regulation of intracellular signal transduction	biological_process	3.4662e-06	0.00024485		GO:1902531	regulation of intracellular signal transduction	biological_process	3.8646e-06	0.0002745
GO:1901701	cellular response to oxygen-containing compound	biological_process	3.4709e-06	0.00024485		GO:0071495	cellular response to endogenous stimulus	biological_process	3.9185e-06	0.00027737
GO:0042127	regulation of cell proliferation	biological_process	3.5701e-06	0.00025099		GO:0050686	negative regulation of mRNA processing	biological_process	4.0843e-06	0.00028813
GO:0061008	hepaticobiliary system development	biological_process	3.6168e-06	0.00025286		GO:0008285	negative regulation of cell proliferation	biological_process	4.1262e-06	0.00029009
GO:0006163	purine nucleotide metabolic process	biological_process	3.621e-06	0.00025286		GO:0003729	mRNA binding	molecular_function	4.2721e-06	0.00029933
GO:0001701	in utero embryonic development	biological_process	3.8057e-06	0.00026487		GO:1902578	single-organism localization	biological_process	4.3642e-06	0.00030469
GO:0051252	regulation of RNA metabolic process	biological_process	3.8609e-06	0.00026781		GO:0010720	positive regulation of cell development	biological_process	4.378e-06	0.00030469
GO:0045786	negative regulation of cell cycle	biological_process	3.9284e-06	0.00027073		GO:0000784	nuclear chromosome, telomeric region	cellular_component	4.808e-06	0.00033312
GO:0005924	cell-substrate adherens junction	cellular_component	3.9416e-06	0.00027073		GO:1904019	epithelial cell apoptotic process	biological_process	4.8185e-06	0.00033312
GO:0048869	cellular developmental process	biological_process	3.9421e-06	0.00027073		GO:0009890	negative regulation of biosynthetic process	biological_process	5.0172e-06	0.0003457
GO:0030162	regulation of proteolysis	biological_process	4.0313e-06	0.00027593		GO:0016567	protein ubiquitination	biological_process	5.0771e-06	0.00034868
GO:0009056	catabolic process	biological_process	4.5484e-06	0.00031031		GO:0048514	blood vessel morphogenesis	biological_process	5.3775e-06	0.00036809
GO:0043549	regulation of kinase activity	biological_process	4.5987e-06	0.00031271		GO:0031399	regulation of protein modification process	biological_process	5.9164e-06	0.00040364
GO:0009790	embryo development	biological_process	4.7504e-06	0.00032197		GO:0001944	vasculature development	biological_process	5.9392e-06	0.00040386
GO:0009135	purine nucleoside diphosphate metabolic process	biological_process	5.0606e-06	0.00034077		GO:0033043	regulation of organelle organization	biological_process	6.9876e-06	0.0004736
GO:0009179	purine ribonucleoside diphosphate metabolic process	biological_process	5.0606e-06	0.00034077		GO:0043168	anion binding	molecular_function	7.1249e-06	0.00048134
GO:0048545	response to steroid hormone	biological_process	5.1728e-06	0.0003472		GO:0097367	carbohydrate derivative binding	molecular_function	7.5003e-06	0.00050505
GO:0051641	cellular localization	biological_process	5.4019e-06	0.00036068		GO:0032559	adenyl ribonucleotide binding	molecular_function	7.6713e-06	0.00051489
GO:0040007	growth	biological_process	5.4085e-06	0.00036068		GO:0001568	blood vessel development	biological_process	7.7463e-06	0.00051825
GO:0009887	organ morphogenesis	biological_process	5.5517e-06	0.00036905		GO:0032508	DNA duplex unwinding	biological_process	7.9117e-06	0.00052762
GO:0071396	cellular response to lipid	biological_process	5.6337e-06	0.0003733		GO:0048024	regulation of mRNA splicing, via spliceosome	biological_process	8.0986e-06	0.00053835
GO:0055086	nucleobase-containing small molecule metabolic process	biological_process	5.7149e-06	0.00037748		GO:0048524	positive regulation of viral process	biological_process	8.1389e-06	0.00053921
GO:0097305	response to alcohol	biological_process	5.9523e-06	0.00039191		GO:0018193	peptidyl-amino acid modification	biological_process	8.1635e-06	0.00053921
GO:0009150	purine ribonucleotide metabolic process	biological_process	6.1427e-06	0.00040316		GO:0098641	cadherin binding involved in cell-cell adhesion	molecular_function	8.8593e-06	0.00058331
GO:0030055	cell-substrate junction	cellular_component	6.3058e-06	0.00041144		GO:0006468	protein phosphorylation	biological_process	9.0544e-06	0.00059427
GO:0016070	RNA metabolic process	biological_process	6.3085e-06	0.00041144		GO:0097190	apoptotic signaling pathway	biological_process	9.1634e-06	0.00059678
GO:0001649	osteoblast differentiation	biological_process	6.4428e-06	0.00041888		GO:0045893	positive regulation of transcription, DNA-templated	biological_process	9.179e-06	0.00059678
GO:0030163	protein catabolic process	biological_process	6.4817e-06	0.00042009		GO:1903508	positive regulation of nucleic acid-templated transcription	biological_process	9.179e-06	0.00059678
GO:0045296	cadherin binding	molecular_function	6.5433e-06	0.00042276		GO:0050790	regulation of catalytic activity	biological_process	9.2082e-06	0.00059681
GO:0009725	response to hormone	biological_process	6.58e-06	0.00042381		GO:0043167	ion binding	molecular_function	9.6312e-06	0.00062228
GO:0034654	nucleobase-containing compound biosynthetic process	biological_process	6.6568e-06	0.00042714		GO:0051094	positive regulation of developmental process	biological_process	1.0037e-05	0.0006465
GO:1903827	regulation of cellular protein localization	biological_process	6.6728e-06	0.00042714		GO:0072331	signal transduction by p53 class mediator	biological_process	1.0657e-05	0.00068301
GO:0031399	regulation of protein modification process	biological_process	6.8636e-06	0.00043801		GO:0034249	negative regulation of cellular amide metabolic process	biological_process	1.067e-05	0.00068301
GO:0044093	positive regulation of molecular function	biological_process	7.3017e-06	0.00046453		GO:0031988	membrane-bounded vesicle	cellular_component	1.0751e-05	0.00068481
GO:0051094	positive regulation of developmental process	biological_process	8.1849e-06	0.00051913		GO:0080135	regulation of cellular response to stress	biological_process	1.0764e-05	0.00068481
GO:0032879	regulation of localization	biological_process	8.3365e-06	0.00052713		GO:0045597	positive regulation of cell differentiation	biological_process	1.1032e-05	0.00069973
GO:1901362	organic cyclic compound biosynthetic process	biological_process	8.4919e-06	0.00053533		GO:0071229	cellular response to acid chemical	biological_process	1.1331e-05	0.00071646
GO:0019693	ribose phosphate metabolic process	biological_process	8.643e-06	0.0005432		GO:0005913	cell-cell adherens junction	cellular_component	1.1797e-05	0.00074365
GO:0009119	ribonucleoside metabolic process	biological_process	8.8646e-06	0.00055545		GO:0032555	purine ribonucleotide binding	molecular_function	1.2188e-05	0.00076267
GO:0001655	urogenital system development	biological_process	9.0618e-06	0.00056609		GO:0050434	positive regulation of viral transcription	biological_process	1.2204e-05	0.00076267
GO:0051270	regulation of cellular component movement	biological_process	9.2264e-06	0.00057464		GO:0030554	adenyl nucleotide binding	molecular_function	1.2209e-05	0.00076267
GO:0045597	positive regulation of cell differentiation	biological_process	9.9033e-06	0.00061495		GO:1903902	positive regulation of viral life cycle	biological_process	1.233e-05	0.00076792
GO:0005913	cell-cell adherens junction	cellular_component	1.0028e-05	0.00062085		GO:0051301	cell division	biological_process	1.2625e-05	0.00078397
GO:0051174	regulation of phosphorus metabolic process	biological_process	1.0091e-05	0.0006229		GO:0071166	ribonucleoprotein complex localization	biological_process	1.2668e-05	0.00078429
GO:0043542	endothelial cell migration	biological_process	1.0254e-05	0.00063108		GO:0032553	ribonucleotide binding	molecular_function	1.3205e-05	0.0008151
GO:0061448	connective tissue development	biological_process	1.034e-05	0.0006345		GO:0006406	mRNA export from nucleus	biological_process	1.3289e-05	0.0008154
GO:0046907	intracellular transport	biological_process	1.0483e-05	0.00064133		GO:0071427	mRNA-containing ribonucleoprotein complex export from nucleus	biological_process	1.3289e-05	0.0008154
GO:0001047	core promoter binding	molecular_function	1.0677e-05	0.0006513		GO:0060548	negative regulation of cell death	biological_process	1.378e-05	0.0008412
GO:0006198	cAMP catabolic process	biological_process	1.0792e-05	0.00065639		GO:0040008	regulation of growth	biological_process	1.379e-05	0.0008412
GO:0009132	nucleoside diphosphate metabolic process	biological_process	1.0949e-05	0.00066399		GO:0044265	cellular macromolecule catabolic process	biological_process	1.4514e-05	0.00088277
GO:0007005	mitochondrion organization	biological_process	1.1443e-05	0.00069192		GO:0032392	DNA geometric change	biological_process	1.4572e-05	0.0008837
GO:0042325	regulation of phosphorylation	biological_process	1.1881e-05	0.00071251		GO:0071426	ribonucleoprotein complex export from nucleus	biological_process	1.4992e-05	0.00090653
GO:0022603	regulation of anatomical structure morphogenesis	biological_process	1.1885e-05	0.00071251		GO:0071702	organic substance transport	biological_process	1.5216e-05	0.00091739
GO:0071229	cellular response to acid chemical	biological_process	1.1887e-05	0.00071251		GO:0017076	purine nucleotide binding	molecular_function	1.5715e-05	0.00094474
GO:0005730	nucleolus	cellular_component	1.2407e-05	0.00074157		GO:0010770	positive regulation of cell morphogenesis involved in differentiation	biological_process	1.6449e-05	0.00098598
GO:0044877	macromolecular complex binding	molecular_function	1.2552e-05	0.0007481		GO:0071396	cellular response to lipid	biological_process	1.6604e-05	0.00099196
GO:1903506	regulation of nucleic acid-templated transcription	biological_process	1.3107e-05	0.0007789		GO:0014070	response to organic cyclic compound	biological_process	1.6644e-05	0.00099196
GO:2001141	regulation of RNA biosynthetic process	biological_process	1.3313e-05	0.00078888		GO:0004842	ubiquitin-protein transferase activity	molecular_function	1.6826e-05	0.00099991
GO:0009259	ribonucleotide metabolic process	biological_process	1.3963e-05	0.00082503		GO:0008134	transcription factor binding	molecular_function	1.6923e-05	0.0010028
GO:0008637	apoptotic mitochondrial changes	biological_process	1.4126e-05	0.00083233		GO:0005813	centrosome	cellular_component	1.7892e-05	0.0010572
GO:0045944	positive regulation of transcription from RNA polymerase II promoter	biological_process	1.483e-05	0.00087134		GO:1903312	negative regulation of mRNA metabolic process	biological_process	1.8011e-05	0.0010612
GO:0009628	response to abiotic stimulus	biological_process	1.5211e-05	0.0008912		GO:0006325	chromatin organization	biological_process	1.8535e-05	0.001089
GO:0046364	monosaccharide biosynthetic process	biological_process	1.5421e-05	0.00090092		GO:0001882	nucleoside binding	molecular_function	1.878e-05	0.0011003
GO:0048511	rhythmic process	biological_process	1.6081e-05	0.00093686		GO:0015931	nucleobase-containing compound transport	biological_process	1.8916e-05	0.0011051
GO:2000145	regulation of cell motility	biological_process	1.6518e-05	0.00095959		GO:0009790	embryo development	biological_process	1.9382e-05	0.0011226
GO:0033002	muscle cell proliferation	biological_process	1.79e-05	0.001037		GO:0050657	nucleic acid transport	biological_process	1.9432e-05	0.0011226
GO:0010948	negative regulation of cell cycle process	biological_process	1.8155e-05	0.0010489		GO:0050658	RNA transport	biological_process	1.9432e-05	0.0011226
GO:0072521	purine-containing compound metabolic process	biological_process	1.9245e-05	0.0011087		GO:0051236	establishment of RNA localization	biological_process	1.9432e-05	0.0011226
GO:0034504	protein localization to nucleus	biological_process	1.9709e-05	0.0011323		GO:0031982	vesicle	cellular_component	1.958e-05	0.001128
GO:0009117	nucleotide metabolic process	biological_process	2.0034e-05	0.0011478		GO:0009725	response to hormone	biological_process	2.0256e-05	0.0011637
GO:0009792	embryo development ending in birth or egg hatching	biological_process	2.0397e-05	0.0011654		GO:0045595	regulation of cell differentiation	biological_process	2.0401e-05	0.0011688
GO:0010564	regulation of cell cycle process	biological_process	2.0667e-05	0.0011775		GO:0022603	regulation of anatomical structure morphogenesis	biological_process	2.0547e-05	0.001174
GO:0043009	chordate embryonic development	biological_process	2.0851e-05	0.0011848		GO:0071363	cellular response to growth factor stimulus	biological_process	2.0678e-05	0.0011782
GO:0006753	nucleoside phosphate metabolic process	biological_process	2.134e-05	0.0012093		GO:0042393	histone binding	molecular_function	2.0869e-05	0.0011833
GO:0045746	negative regulation of Notch signaling pathway	biological_process	2.153e-05	0.0012167		GO:0016569	covalent chromatin modification	biological_process	2.0882e-05	0.0011833
GO:0006732	coenzyme metabolic process	biological_process	2.2185e-05	0.0012503		GO:0045296	cadherin binding	molecular_function	2.1529e-05	0.0012166
GO:0007568	aging	biological_process	2.3009e-05	0.0012932		GO:0010608	posttranscriptional regulation of gene expression	biological_process	2.2455e-05	0.0012653
GO:0030334	regulation of cell migration	biological_process	2.3358e-05	0.001307		GO:2000738	positive regulation of stem cell differentiation	biological_process	2.2511e-05	0.0012653
GO:0042770	signal transduction in response to DNA damage	biological_process	2.338e-05	0.001307		GO:0043484	regulation of RNA splicing	biological_process	2.3658e-05	0.0013261
GO:0046365	monosaccharide catabolic process	biological_process	2.4359e-05	0.0013581		GO:0000209	protein polyubiquitination	biological_process	2.5823e-05	0.0014436
GO:0019320	hexose catabolic process	biological_process	2.446e-05	0.0013584		GO:0044403	symbiosis, encompassing mutualism through parasitism	biological_process	2.6494e-05	0.0014732
GO:0044724	single-organism carbohydrate catabolic process	biological_process	2.4495e-05	0.0013584		GO:0044419	interspecies interaction between organisms	biological_process	2.6494e-05	0.0014732
GO:0009967	positive regulation of signal transduction	biological_process	2.5269e-05	0.0013976		GO:0001883	purine nucleoside binding	molecular_function	2.6727e-05	0.0014821
GO:0044429	mitochondrial part	cellular_component	2.5698e-05	0.0014175		GO:0032549	ribonucleoside binding	molecular_function	2.7547e-05	0.0015235
GO:0001932	regulation of protein phosphorylation	biological_process	2.816e-05	0.0015491		GO:0043549	regulation of kinase activity	biological_process	2.8422e-05	0.0015678
GO:1901566	organonitrogen compound biosynthetic process	biological_process	2.868e-05	0.0015736		GO:0050793	regulation of developmental process	biological_process	2.9075e-05	0.0015995
GO:0023052	signaling	biological_process	2.8828e-05	0.0015775		GO:0032550	purine ribonucleoside binding	molecular_function	2.9528e-05	0.0016202
GO:0030330	DNA damage response, signal transduction by p53 class mediator	biological_process	2.9183e-05	0.0015928		GO:0040001	establishment of mitotic spindle localization	biological_process	3.1785e-05	0.0017394
GO:0048584	positive regulation of response to stimulus	biological_process	2.9623e-05	0.0016126		GO:0006886	intracellular protein transport	biological_process	3.1978e-05	0.0017453
GO:0006355	regulation of transcription, DNA-templated	biological_process	3.018e-05	0.0016386		GO:0010498	proteasomal protein catabolic process	biological_process	3.2366e-05	0.0017619
GO:0022402	cell cycle process	biological_process	3.145e-05	0.001703		GO:0019787	ubiquitin-like protein transferase activity	molecular_function	3.2578e-05	0.0017688
GO:0001837	epithelial to mesenchymal transition	biological_process	3.1531e-05	0.001703		GO:0065008	regulation of biological quality	biological_process	3.3378e-05	0.0018075
GO:0005575	cellular_component	cellular_component	3.1715e-05	0.0017052		GO:0008361	regulation of cell size	biological_process	3.4454e-05	0.0018609
GO:0044389	ubiquitin-like protein ligase binding	molecular_function	3.1817e-05	0.0017052		GO:0051716	cellular response to stimulus	biological_process	3.5566e-05	0.0019159
GO:0051130	positive regulation of cellular component organization	biological_process	3.1837e-05	0.0017052		GO:0000785	chromatin	cellular_component	3.566e-05	0.001916
GO:0044248	cellular catabolic process	biological_process	3.1901e-05	0.0017052		GO:0044765	single-organism transport	biological_process	3.5845e-05	0.001917
GO:0097193	intrinsic apoptotic signaling pathway	biological_process	3.4676e-05	0.0018488		GO:0019058	viral life cycle	biological_process	3.5864e-05	0.001917
GO:0034613	cellular protein localization	biological_process	3.4923e-05	0.0018572		GO:0023057	negative regulation of signaling	biological_process	3.6126e-05	0.0019261
GO:0071548	response to dexamethasone	biological_process	3.5175e-05	0.0018625		GO:0035639	purine ribonucleoside triphosphate binding	molecular_function	3.6506e-05	0.0019383
GO:0016567	protein ubiquitination	biological_process	3.5203e-05	0.0018625		GO:0046134	pyrimidine nucleoside biosynthetic process	biological_process	3.6573e-05	0.0019383
GO:0097659	nucleic acid-templated transcription	biological_process	3.6322e-05	0.0019138		GO:0005637	nuclear inner membrane	cellular_component	3.6645e-05	0.0019383
GO:0000278	mitotic cell cycle	biological_process	3.6356e-05	0.0019138		GO:0007010	cytoskeleton organization	biological_process	3.6728e-05	0.0019383
GO:0001228	transcriptional activator activity, RNA polymerase II transcription regulatory region sequence-specific binding	molecular_function	3.6665e-05	0.0019251		GO:0051310	metaphase plate congression	biological_process	3.713e-05	0.0019545
GO:0061061	muscle structure development	biological_process	3.7062e-05	0.0019411		GO:0005524	ATP binding	molecular_function	3.7715e-05	0.0019803
GO:0019220	regulation of phosphate metabolic process	biological_process	3.8962e-05	0.0020354		GO:0048869	cellular developmental process	biological_process	3.8019e-05	0.0019912
GO:0010720	positive regulation of cell development	biological_process	3.9577e-05	0.0020624		GO:0034622	cellular macromolecular complex assembly	biological_process	3.8738e-05	0.0020238
GO:0070727	cellular macromolecule localization	biological_process	3.9743e-05	0.0020658		GO:0030154	cell differentiation	biological_process	3.9353e-05	0.0020507
GO:1902494	catalytic complex	cellular_component	4.0138e-05	0.0020812		GO:0018205	peptidyl-lysine modification	biological_process	3.9538e-05	0.0020552
GO:0031076	embryonic camera-type eye development	biological_process	4.0559e-05	0.0020896		GO:0042127	regulation of cell proliferation	biological_process	4.0137e-05	0.0020811
GO:0009116	nucleoside metabolic process	biological_process	4.057e-05	0.0020896		GO:0007062	sister chromatid cohesion	biological_process	4.3383e-05	0.0022438
GO:0051247	positive regulation of protein metabolic process	biological_process	4.0602e-05	0.0020896		GO:0008283	cell proliferation	biological_process	4.3894e-05	0.0022646
GO:0031667	response to nutrient levels	biological_process	4.1511e-05	0.0021265		GO:0001525	angiogenesis	biological_process	4.4095e-05	0.0022693
GO:0040013	negative regulation of locomotion	biological_process	4.1524e-05	0.0021265		GO:0044093	positive regulation of molecular function	biological_process	4.425e-05	0.0022716
GO:0071156	regulation of cell cycle arrest	biological_process	4.2259e-05	0.0021577		GO:0001101	response to acid chemical	biological_process	4.4749e-05	0.0022916
GO:0031625	ubiquitin protein ligase binding	molecular_function	4.2343e-05	0.0021577		GO:0042060	wound healing	biological_process	4.5423e-05	0.0023138
GO:0048660	regulation of smooth muscle cell proliferation	biological_process	4.2706e-05	0.0021709		GO:0003678	DNA helicase activity	molecular_function	4.5447e-05	0.0023138
GO:0045930	negative regulation of mitotic cell cycle	biological_process	4.2869e-05	0.0021738		GO:0070848	response to growth factor	biological_process	4.5517e-05	0.0023138
GO:0051090	regulation of sequence-specific DNA binding transcription factor activity	biological_process	4.3608e-05	0.002206		GO:0036002	pre-mRNA binding	molecular_function	4.5741e-05	0.0023195
GO:0051336	regulation of hydrolase activity	biological_process	4.3721e-05	0.0022063		GO:0034605	cellular response to heat	biological_process	4.6918e-05	0.0023734
GO:0019319	hexose biosynthetic process	biological_process	4.3931e-05	0.0022115		GO:0016605	PML body	cellular_component	4.7774e-05	0.0024098
GO:0044700	single organism signaling	biological_process	4.5101e-05	0.0022649		GO:0008092	cytoskeletal protein binding	molecular_function	4.787e-05	0.0024098
GO:0040011	locomotion	biological_process	4.6328e-05	0.0023209		GO:0048646	anatomical structure formation involved in morphogenesis	biological_process	4.8564e-05	0.0024388
GO:0002042	cell migration involved in sprouting angiogenesis	biological_process	4.7791e-05	0.0023884		GO:0007067	mitotic nuclear division	biological_process	4.9598e-05	0.0024847
GO:0003676	nucleic acid binding	molecular_function	4.882e-05	0.002434		GO:0044430	cytoskeletal part	cellular_component	5.06e-05	0.0025288
GO:0045732	positive regulation of protein catabolic process	biological_process	5.0431e-05	0.002503		GO:0016740	transferase activity	molecular_function	5.2311e-05	0.002608
GO:0080135	regulation of cellular response to stress	biological_process	5.0448e-05	0.002503		GO:0043069	negative regulation of programmed cell death	biological_process	5.2573e-05	0.0026148
GO:0071300	cellular response to retinoic acid	biological_process	5.0568e-05	0.002503		GO:0006405	RNA export from nucleus	biological_process	5.3745e-05	0.0026667
GO:0033043	regulation of organelle organization	biological_process	5.0892e-05	0.0025131		GO:0017148	negative regulation of translation	biological_process	5.437e-05	0.0026913
GO:0032526	response to retinoic acid	biological_process	5.3086e-05	0.0026152		GO:0022612	gland morphogenesis	biological_process	5.5381e-05	0.0027303
GO:0043618	regulation of transcription from RNA polymerase II promoter in response to stress	biological_process	5.3789e-05	0.0026436		GO:0006281	DNA repair	biological_process	5.5423e-05	0.0027303
GO:0004115	3',5'-cyclic-AMP phosphodiesterase activity	molecular_function	5.5056e-05	0.0026994		GO:0006810	transport	biological_process	5.7527e-05	0.0028273
GO:0045596	negative regulation of cell differentiation	biological_process	5.5911e-05	0.0027349		GO:0016462	pyrophosphatase activity	molecular_function	5.85e-05	0.0028683
GO:0051169	nuclear transport	biological_process	5.6296e-05	0.002743		GO:1901990	regulation of mitotic cell cycle phase transition	biological_process	5.9335e-05	0.0029016
GO:0009057	macromolecule catabolic process	biological_process	5.6437e-05	0.002743		GO:0003730	mRNA 3'-UTR binding	molecular_function	5.9458e-05	0.0029016
GO:0030054	cell junction	cellular_component	5.6473e-05	0.002743		GO:1901988	negative regulation of cell cycle phase transition	biological_process	6.0829e-05	0.0029615
GO:0007154	cell communication	biological_process	5.6621e-05	0.0027437		GO:0032535	regulation of cellular component size	biological_process	6.237e-05	0.0030282
GO:0051129	negative regulation of cellular component organization	biological_process	5.6807e-05	0.0027463		GO:0044257	cellular protein catabolic process	biological_process	6.249e-05	0.0030282
GO:0007050	cell cycle arrest	biological_process	5.7524e-05	0.0027745		GO:0010718	positive regulation of epithelial to mesenchymal transition	biological_process	6.5002e-05	0.0031425
GO:0043620	regulation of DNA-templated transcription in response to stress	biological_process	5.7686e-05	0.0027759		GO:0000781	chromosome, telomeric region	cellular_component	6.519e-05	0.0031443
GO:0044843	cell cycle G1/S phase transition	biological_process	5.8007e-05	0.0027849		GO:0016818	hydrolase activity, acting on acid anhydrides, in phosphorus-containing anhydrides	molecular_function	6.5574e-05	0.0031554
GO:0060070	canonical Wnt signaling pathway	biological_process	5.8444e-05	0.002793		GO:0042325	regulation of phosphorylation	biological_process	6.6934e-05	0.0032135
GO:0000079	regulation of cyclin-dependent protein serine/threonine kinase activity	biological_process	5.8445e-05	0.002793		GO:0017111	nucleoside-triphosphatase activity	molecular_function	6.7302e-05	0.0032237
GO:0036003	positive regulation of transcription from RNA polymerase II promoter in response to stress	biological_process	5.8906e-05	0.0028085		GO:0006458	'de novo' protein folding	biological_process	6.8617e-05	0.0032791
GO:0009214	cyclic nucleotide catabolic process	biological_process	6.042e-05	0.0028716		GO:0043066	negative regulation of apoptotic process	biological_process	6.9529e-05	0.003315
GO:0000082	G1/S transition of mitotic cell cycle	biological_process	6.0505e-05	0.0028716		GO:0007093	mitotic cell cycle checkpoint	biological_process	6.9873e-05	0.0033238
GO:0006351	transcription, DNA-templated	biological_process	6.0666e-05	0.0028726		GO:0061387	regulation of extent of cell growth	biological_process	7.0511e-05	0.0033465
GO:0031982	vesicle	cellular_component	6.1997e-05	0.002929		GO:0000790	nuclear chromatin	cellular_component	7.0746e-05	0.0033499
GO:0009991	response to extracellular stimulus	biological_process	6.6506e-05	0.0031343		GO:0030175	filopodium	cellular_component	7.1855e-05	0.0033947
GO:0051093	negative regulation of developmental process	biological_process	6.6646e-05	0.0031343		GO:0042802	identical protein binding	molecular_function	7.3534e-05	0.0034661
GO:2001233	regulation of apoptotic signaling pathway	biological_process	6.7933e-05	0.0031863		GO:0031589	cell-substrate adhesion	biological_process	7.4671e-05	0.0035117
GO:0006094	gluconeogenesis	biological_process	6.8059e-05	0.0031863		GO:0005739	mitochondrion	cellular_component	7.5657e-05	0.0035501
GO:0065008	regulation of biological quality	biological_process	6.9902e-05	0.0032652		GO:0042762	regulation of sulfur metabolic process	biological_process	7.8092e-05	0.003656
GO:0035295	tube development	biological_process	7.0111e-05	0.0032677		GO:0090305	nucleic acid phosphodiester bond hydrolysis	biological_process	7.8762e-05	0.0036791
GO:0044262	cellular carbohydrate metabolic process	biological_process	7.181e-05	0.0033334		GO:0010648	negative regulation of cell communication	biological_process	8.0518e-05	0.0037527
GO:0002040	sprouting angiogenesis	biological_process	7.1843e-05	0.0033334		GO:0051603	proteolysis involved in cellular protein catabolic process	biological_process	8.083e-05	0.0037569
GO:1904029	regulation of cyclin-dependent protein kinase activity	biological_process	7.319e-05	0.0033883		GO:0060429	epithelium development	biological_process	8.097e-05	0.0037569
GO:0007167	enzyme linked receptor protein signaling pathway	biological_process	7.4976e-05	0.0034632		GO:0006271	DNA strand elongation involved in DNA replication	biological_process	8.196e-05	0.0037943
GO:0061458	reproductive system development	biological_process	7.6302e-05	0.0035167		GO:0009628	response to abiotic stimulus	biological_process	8.3531e-05	0.0038584
GO:0010647	positive regulation of cell communication	biological_process	8.0332e-05	0.0036942		GO:0045862	positive regulation of proteolysis	biological_process	8.3925e-05	0.003868
GO:0001667	ameboidal-type cell migration	biological_process	8.0746e-05	0.003705		GO:0016817	hydrolase activity, acting on acid anhydrides	molecular_function	8.5491e-05	0.0039231
GO:0006913	nucleocytoplasmic transport	biological_process	8.3844e-05	0.0038387		GO:0007059	chromosome segregation	biological_process	8.5558e-05	0.0039231
GO:0051347	positive regulation of transferase activity	biological_process	8.483e-05	0.0038753		GO:1904035	regulation of epithelial cell apoptotic process	biological_process	8.5861e-05	0.0039231
GO:0032446	protein modification by small protein conjugation	biological_process	8.5366e-05	0.0038912		GO:0005681	spliceosomal complex	cellular_component	8.5877e-05	0.0039231
GO:0097306	cellular response to alcohol	biological_process	8.5883e-05	0.0039062		GO:0071897	DNA biosynthetic process	biological_process	9.1269e-05	0.0041603
GO:0006275	regulation of DNA replication	biological_process	8.6257e-05	0.0039146		GO:0031570	DNA integrity checkpoint	biological_process	9.2844e-05	0.0042228
GO:1901698	response to nitrogen compound	biological_process	9.6807e-05	0.0043838		GO:0048589	developmental growth	biological_process	9.3352e-05	0.0042366
GO:0006974	cellular response to DNA damage stimulus	biological_process	9.8867e-05	0.0044673		GO:0006369	termination of RNA polymerase II transcription	biological_process	9.5544e-05	0.0043266
GO:0045926	negative regulation of growth	biological_process	0.00010092	0.00455		GO:0035258	steroid hormone receptor binding	molecular_function	9.6145e-05	0.0043443
GO:0048659	smooth muscle cell proliferation	biological_process	0.00010252	0.0046125		GO:0045859	regulation of protein kinase activity	biological_process	9.7112e-05	0.0043785
GO:0007169	transmembrane receptor protein tyrosine kinase signaling pathway	biological_process	0.00010513	0.0047197		GO:0098805	whole membrane	cellular_component	0.00010062	0.0045269
GO:0016052	carbohydrate catabolic process	biological_process	0.00010654	0.0047726		GO:0061024	membrane organization	biological_process	0.00010245	0.0045992
GO:0051170	nuclear import	biological_process	0.00010706	0.0047855		GO:0051084	'de novo' posttranslational protein folding	biological_process	0.00010356	0.0046388
GO:0060284	regulation of cell development	biological_process	0.00010824	0.0048276		GO:0007166	cell surface receptor signaling pathway	biological_process	0.00010455	0.0046732
GO:0048705	skeletal system morphogenesis	biological_process	0.00011254	0.0050086		GO:0007435	salivary gland morphogenesis	biological_process	0.00010598	0.004727
GO:1901991	negative regulation of mitotic cell cycle phase transition	biological_process	0.00011368	0.0050487		GO:0006979	response to oxidative stress	biological_process	0.00010743	0.0047814
GO:0044085	cellular component biogenesis	biological_process	0.0001144	0.0050699		GO:0043566	structure-specific DNA binding	molecular_function	0.00010906	0.0048435
GO:0045862	positive regulation of proteolysis	biological_process	0.00011836	0.005234		GO:0071900	regulation of protein serine/threonine kinase activity	biological_process	0.00011101	0.0049197
GO:0048029	monosaccharide binding	molecular_function	0.00011888	0.005246		GO:0002009	morphogenesis of an epithelium	biological_process	0.00012068	0.0053369
GO:1903047	mitotic cell cycle process	biological_process	0.00012081	0.0053196		GO:0034976	response to endoplasmic reticulum stress	biological_process	0.00012104	0.0053412
GO:1901135	carbohydrate derivative metabolic process	biological_process	0.00012169	0.0053461		GO:0005178	integrin binding	molecular_function	0.00012229	0.0053757
GO:0016740	transferase activity	molecular_function	0.00012208	0.0053461		GO:0032879	regulation of localization	biological_process	0.00012234	0.0053757
GO:0031988	membrane-bounded vesicle	cellular_component	0.00012218	0.0053461		GO:0032386	regulation of intracellular transport	biological_process	0.00012264	0.0053773
GO:0001822	kidney development	biological_process	0.00012307	0.0053731		GO:0015031	protein transport	biological_process	0.00012734	0.0055718
GO:0007346	regulation of mitotic cell cycle	biological_process	0.00012332	0.0053731		GO:0051650	establishment of vesicle localization	biological_process	0.00012869	0.0056191
GO:0055114	oxidation-reduction process	biological_process	0.00012382	0.0053836		GO:0008270	zinc ion binding	molecular_function	0.00012902	0.0056217
GO:0051216	cartilage development	biological_process	0.00012502	0.0054247		GO:0043236	laminin binding	molecular_function	0.0001318	0.0057305
GO:0042493	response to drug	biological_process	0.00012621	0.0054641		GO:0030308	negative regulation of cell growth	biological_process	0.00013535	0.0058444
GO:1901988	negative regulation of cell cycle phase transition	biological_process	0.00012646	0.0054641		GO:0060341	regulation of cellular localization	biological_process	0.00013542	0.0058444
GO:0071158	positive regulation of cell cycle arrest	biological_process	0.00012726	0.0054872		GO:0030516	regulation of axon extension	biological_process	0.0001355	0.0058444
GO:1901342	regulation of vasculature development	biological_process	0.00012795	0.0054972		GO:0043161	proteasome-mediated ubiquitin-dependent protein catabolic process	biological_process	0.00013554	0.0058444
GO:0005068	transmembrane receptor protein tyrosine kinase adaptor activity	molecular_function	0.00012802	0.0054972		GO:0071383	cellular response to steroid hormone stimulus	biological_process	0.0001361	0.0058561
GO:0035966	response to topologically incorrect protein	biological_process	0.00012901	0.005528		GO:0044389	ubiquitin-like protein ligase binding	molecular_function	0.00013841	0.0059328
GO:0005975	carbohydrate metabolic process	biological_process	0.00013038	0.0055755		GO:0006509	membrane protein ectodomain proteolysis	biological_process	0.00013845	0.0059328
GO:0090130	tissue migration	biological_process	0.00013244	0.005652		GO:0010975	regulation of neuron projection development	biological_process	0.00014116	0.0060364
GO:1903362	regulation of cellular protein catabolic process	biological_process	0.00013636	0.0058072		GO:0051303	establishment of chromosome localization	biological_process	0.00014285	0.006096
GO:0043436	oxoacid metabolic process	biological_process	0.00013795	0.0058629		GO:0006323	DNA packaging	biological_process	0.00014481	0.0061673
GO:0032270	positive regulation of cellular protein metabolic process	biological_process	0.00014404	0.006109		GO:0031625	ubiquitin protein ligase binding	molecular_function	0.00014833	0.0063042
GO:0032386	regulation of intracellular transport	biological_process	0.00014442	0.0061128		GO:0006268	DNA unwinding involved in DNA replication	biological_process	0.00015533	0.006588
GO:0030278	regulation of ossification	biological_process	0.00014504	0.0061263		GO:0031984	organelle subcompartment	cellular_component	0.00016023	0.0067818
GO:0048870	cell motility	biological_process	0.00014604	0.0061436		GO:0046332	SMAD binding	molecular_function	0.00016209	0.0068468
GO:0051674	localization of cell	biological_process	0.00014604	0.0061436		GO:0048729	tissue morphogenesis	biological_process	0.00016476	0.0069453
GO:0006986	response to unfolded protein	biological_process	0.00014796	0.0062119		GO:1902806	regulation of cell cycle G1/S phase transition	biological_process	0.00016705	0.0070156
GO:0007165	signal transduction	biological_process	0.00014993	0.0062818		GO:0045934	negative regulation of nucleobase-containing compound metabolic process	biological_process	0.0001671	0.0070156
GO:0048608	reproductive structure development	biological_process	0.00015026	0.006283		GO:1900034	regulation of cellular response to heat	biological_process	0.00017103	0.007166
GO:0003727	single-stranded RNA binding	molecular_function	0.00015273	0.0063734		GO:0000070	mitotic sister chromatid segregation	biological_process	0.00017664	0.0073861
GO:0060021	palate development	biological_process	0.00015567	0.0064831		GO:0035861	site of double-strand break	cellular_component	0.00017876	0.0074597
GO:1901657	glycosyl compound metabolic process	biological_process	0.0001571	0.0065297		GO:0016570	histone modification	biological_process	0.00018031	0.0075092
GO:0030496	midbody	cellular_component	0.00015999	0.0066366		GO:0051253	negative regulation of RNA metabolic process	biological_process	0.00018332	0.0076194
GO:0006082	organic acid metabolic process	biological_process	0.00016044	0.006638		GO:0007492	endoderm development	biological_process	0.00018665	0.0077424
GO:0044212	transcription regulatory region DNA binding	molecular_function	0.00016071	0.006638		GO:0043034	costamere	cellular_component	0.00018858	0.0077953
GO:0005685	U1 snRNP	cellular_component	0.00016099	0.006638		GO:0007431	salivary gland development	biological_process	0.00018868	0.0077953
GO:0016477	cell migration	biological_process	0.00016448	0.0067684		GO:0009408	response to heat	biological_process	0.00019222	0.007916
GO:1902532	negative regulation of intracellular signal transduction	biological_process	0.00016528	0.0067746		GO:0015629	actin cytoskeleton	cellular_component	0.00019237	0.007916
GO:0010508	positive regulation of autophagy	biological_process	0.00016528	0.0067746		GO:0051085	chaperone mediated protein folding requiring cofactor	biological_process	0.00019581	0.0080419
GO:0044257	cellular protein catabolic process	biological_process	0.00016936	0.0069279		GO:0006903	vesicle targeting	biological_process	0.00019779	0.0081072
GO:0060429	epithelium development	biological_process	0.00017008	0.0069437		GO:2001252	positive regulation of chromosome organization	biological_process	0.00019856	0.0081226
GO:0045765	regulation of angiogenesis	biological_process	0.00017096	0.0069662		GO:0050000	chromosome localization	biological_process	0.0002015	0.0082267
GO:0006928	movement of cell or subcellular component	biological_process	0.00017999	0.0073198		GO:0044802	single-organism membrane organization	biological_process	0.00020271	0.0082598
GO:0016773	phosphotransferase activity, alcohol group as acceptor	molecular_function	0.00018154	0.0073628		GO:0048207	vesicle targeting, rough ER to cis-Golgi	biological_process	0.00020395	0.0082777
GO:1900180	regulation of protein localization to nucleus	biological_process	0.00018176	0.0073628		GO:0048208	COPII vesicle coating	biological_process	0.00020395	0.0082777
GO:0060322	head development	biological_process	0.00018217	0.0073649		GO:0019867	outer membrane	cellular_component	0.00021444	0.0086866
GO:0000975	regulatory region DNA binding	molecular_function	0.00018894	0.0076239		GO:0006511	ubiquitin-dependent protein catabolic process	biological_process	0.00021491	0.0086884
GO:0010498	proteasomal protein catabolic process	biological_process	0.00019069	0.007672		GO:0030496	midbody	cellular_component	0.00021706	0.0087584
GO:0000289	nuclear-transcribed mRNA poly(A) tail shortening	biological_process	0.00019121	0.007672		GO:0016887	ATPase activity	molecular_function	0.00021814	0.008785
GO:0010631	epithelial cell migration	biological_process	0.0001916	0.007672		GO:0000122	negative regulation of transcription from RNA polymerase II promoter	biological_process	0.00022102	0.0088837
GO:0045667	regulation of osteoblast differentiation	biological_process	0.00019161	0.007672		GO:0010035	response to inorganic substance	biological_process	0.00022184	0.0088995
GO:0050769	positive regulation of neurogenesis	biological_process	0.00019314	0.0077184		GO:1901991	negative regulation of mitotic cell cycle phase transition	biological_process	0.00022265	0.0089145
GO:1990234	transferase complex	cellular_component	0.00019384	0.0077314		GO:0035987	endodermal cell differentiation	biological_process	0.00022444	0.0089691
GO:0044344	cellular response to fibroblast growth factor stimulus	biological_process	0.00019492	0.0077596		GO:0075733	intracellular transport of virus	biological_process	0.00022545	0.0089921
GO:0051100	negative regulation of binding	biological_process	0.00019817	0.0078709		GO:0010769	regulation of cell morphogenesis involved in differentiation	biological_process	0.00022671	0.009025
GO:0072001	renal system development	biological_process	0.00019863	0.0078709		GO:0001706	endoderm formation	biological_process	0.00022794	0.0090408
GO:0071774	response to fibroblast growth factor	biological_process	0.00019943	0.0078709		GO:0071384	cellular response to corticosteroid stimulus	biological_process	0.00022798	0.0090408
GO:0007399	nervous system development	biological_process	0.00019961	0.0078709		GO:0048585	negative regulation of response to stimulus	biological_process	0.00022935	0.0090776
GO:0072331	signal transduction by p53 class mediator	biological_process	0.00019962	0.0078709		GO:0001932	regulation of protein phosphorylation	biological_process	0.00023131	0.0091377
GO:0001067	regulatory region nucleic acid binding	molecular_function	0.00020198	0.007949		GO:0042326	negative regulation of phosphorylation	biological_process	0.00023315	0.009193
GO:0008092	cytoskeletal protein binding	molecular_function	0.00020284	0.0079676		GO:0000077	DNA damage checkpoint	biological_process	0.0002389	0.0094018
GO:0043393	regulation of protein binding	biological_process	0.00020831	0.008167		GO:0051653	spindle localization	biological_process	0.00024049	0.0094464
GO:0032774	RNA biosynthetic process	biological_process	0.00020923	0.0081875		GO:0051098	regulation of binding	biological_process	0.00024534	0.0096187
GO:0010944	negative regulation of transcription by competitive promoter binding	biological_process	0.0002109	0.0082376		GO:0009968	negative regulation of signal transduction	biological_process	0.00024835	0.0097185
GO:0016301	kinase activity	molecular_function	0.00021151	0.0082457		GO:0080134	regulation of response to stress	biological_process	0.00025304	0.0098655
GO:0090200	positive regulation of release of cytochrome c from mitochondria	biological_process	0.00021825	0.0084925		GO:0071385	cellular response to glucocorticoid stimulus	biological_process	0.00025306	0.0098655
GO:0009206	purine ribonucleoside triphosphate biosynthetic process	biological_process	0.0002195	0.0085253		GO:0043632	modification-dependent macromolecule catabolic process	biological_process	0.00025581	0.0099541
GO:0071549	cellular response to dexamethasone stimulus	biological_process	0.00022123	0.0085763		GO:0022616	DNA strand elongation	biological_process	0.0002565	0.0099623
GO:0019752	carboxylic acid metabolic process	biological_process	0.00022198	0.0085892		GO:0006213	pyrimidine nucleoside metabolic process	biological_process	0.00026575	0.010299
GO:0043184	vascular endothelial growth factor receptor 2 binding	molecular_function	0.00023178	0.0089519		GO:0032880	regulation of protein localization	biological_process	0.00026617	0.010299
GO:0032870	cellular response to hormone stimulus	biological_process	0.00023652	0.009118		GO:0045944	positive regulation of transcription from RNA polymerase II promoter	biological_process	0.00027269	0.010532
GO:0006839	mitochondrial transport	biological_process	0.00025031	0.0096316		GO:0061138	morphogenesis of a branching epithelium	biological_process	0.00027382	0.010556
GO:0090132	epithelium migration	biological_process	0.00025434	0.0097685		GO:0090114	COPII-coated vesicle budding	biological_process	0.00027899	0.010735
GO:1902807	negative regulation of cell cycle G1/S phase transition	biological_process	0.00025535	0.0097891		GO:0019941	modification-dependent protein catabolic process	biological_process	0.0002836	0.010882
GO:0090398	cellular senescence	biological_process	0.0002631	0.010068		GO:0048513	organ development	biological_process	0.00028385	0.010882
GO:1902589	single-organism organelle organization	biological_process	0.00026506	0.010124		GO:0051648	vesicle localization	biological_process	0.00028595	0.010942
GO:0017038	protein import	biological_process	0.00028181	0.010744		GO:1901796	regulation of signal transduction by p53 class mediator	biological_process	0.00029091	0.011106
GO:0009145	purine nucleoside triphosphate biosynthetic process	biological_process	0.00028344	0.010786		GO:0031329	regulation of cellular catabolic process	biological_process	0.00029138	0.011106
GO:0044773	mitotic DNA damage checkpoint	biological_process	0.00028479	0.010818		GO:0033619	membrane protein proteolysis	biological_process	0.00029185	0.011106
GO:0023056	positive regulation of signaling	biological_process	0.00028652	0.010864		GO:0033157	regulation of intracellular protein transport	biological_process	0.00029612	0.011248
GO:0010639	negative regulation of organelle organization	biological_process	0.00030327	0.011478		GO:0044774	mitotic DNA integrity checkpoint	biological_process	0.00030084	0.011377
GO:0005172	vascular endothelial growth factor receptor binding	molecular_function	0.00030425	0.011494		GO:0048675	axon extension	biological_process	0.00030092	0.011377
GO:0061418	regulation of transcription from RNA polymerase II promoter in response to hypoxia	biological_process	0.00030674	0.011564		GO:2000145	regulation of cell motility	biological_process	0.00030116	0.011377
GO:0051052	regulation of DNA metabolic process	biological_process	0.00030723	0.011564		GO:0042770	signal transduction in response to DNA damage	biological_process	0.00030479	0.011494
GO:0009605	response to external stimulus	biological_process	0.00030994	0.011644		GO:0031968	organelle outer membrane	cellular_component	0.00030688	0.011551
GO:0051240	positive regulation of multicellular organismal process	biological_process	0.00031048	0.011644		GO:0044344	cellular response to fibroblast growth factor stimulus	biological_process	0.00030821	0.011575
GO:0050673	epithelial cell proliferation	biological_process	0.00031159	0.011665		GO:0048199	vesicle targeting, to, from or within Golgi	biological_process	0.00030896	0.011575
GO:0051271	negative regulation of cellular component movement	biological_process	0.00031424	0.011743		GO:0019211	phosphatase activator activity	molecular_function	0.0003092	0.011575
GO:0090287	regulation of cellular response to growth factor stimulus	biological_process	0.00032079	0.011966		GO:0030330	DNA damage response, signal transduction by p53 class mediator	biological_process	0.00032394	0.012105
GO:0005911	cell-cell junction	cellular_component	0.00032276	0.012018		GO:0030111	regulation of Wnt signaling pathway	biological_process	0.00032726	0.012207
GO:0007623	circadian rhythm	biological_process	0.00032465	0.012067		GO:0051293	establishment of spindle localization	biological_process	0.00032885	0.012245
GO:2000134	negative regulation of G1/S transition of mitotic cell cycle	biological_process	0.00032757	0.012154		GO:0004386	helicase activity	molecular_function	0.00033273	0.012367
GO:0045668	negative regulation of osteoblast differentiation	biological_process	0.00033049	0.01221		GO:0000132	establishment of mitotic spindle orientation	biological_process	0.00033552	0.012448
GO:0072413	signal transduction involved in mitotic cell cycle checkpoint	biological_process	0.00033145	0.01221		GO:0030162	regulation of proteolysis	biological_process	0.00034075	0.01262
GO:1902402	signal transduction involved in mitotic DNA damage checkpoint	biological_process	0.00033145	0.01221		GO:0098791	Golgi subcompartment	cellular_component	0.0003437	0.012707
GO:1902403	signal transduction involved in mitotic DNA integrity checkpoint	biological_process	0.00033145	0.01221		GO:0033365	protein localization to organelle	biological_process	0.00034622	0.012753
GO:0048844	artery morphogenesis	biological_process	0.00033555	0.012339		GO:0010256	endomembrane system organization	biological_process	0.00034699	0.012753
GO:0060749	mammary gland alveolus development	biological_process	0.00033728	0.012359		GO:1901699	cellular response to nitrogen compound	biological_process	0.0003472	0.012753
GO:0061377	mammary gland lobule development	biological_process	0.00033728	0.012359		GO:0051270	regulation of cellular component movement	biological_process	0.00034741	0.012753
GO:0045860	positive regulation of protein kinase activity	biological_process	0.00033888	0.012396		GO:0097285	cell-type specific apoptotic process	biological_process	0.00035225	0.012907
GO:0044774	mitotic DNA integrity checkpoint	biological_process	0.0003413	0.012462		GO:0033044	regulation of chromosome organization	biological_process	0.00035302	0.012913
GO:0030279	negative regulation of ossification	biological_process	0.00034313	0.012507		GO:0043138	3'-5' DNA helicase activity	molecular_function	0.0003543	0.012937
GO:0031090	organelle membrane	cellular_component	0.00034982	0.012728		GO:0000775	chromosome, centromeric region	cellular_component	0.0003562	0.012983
GO:0034709	methylosome	cellular_component	0.00035327	0.012832		GO:0006352	DNA-templated transcription, initiation	biological_process	0.0003617	0.013161
GO:0070717	poly-purine tract binding	molecular_function	0.00035966	0.013041		GO:0044773	mitotic DNA damage checkpoint	biological_process	0.00036538	0.013272
GO:0009154	purine ribonucleotide catabolic process	biological_process	0.00037306	0.013503		GO:0061448	connective tissue development	biological_process	0.00036711	0.013275
GO:0016595	glutamate binding	molecular_function	0.00037443	0.013529		GO:0032092	positive regulation of protein binding	biological_process	0.00036731	0.013275
GO:0048468	cell development	biological_process	0.00037579	0.013555		GO:0022604	regulation of cell morphogenesis	biological_process	0.0003674	0.013275
GO:0061419	positive regulation of transcription from RNA polymerase II promoter in response to hypoxia	biological_process	0.00038027	0.013692		GO:0070182	DNA polymerase binding	molecular_function	0.00036854	0.013293
GO:0006261	DNA-dependent DNA replication	biological_process	0.0003876	0.013932		GO:0051174	regulation of phosphorus metabolic process	biological_process	0.00037501	0.013503
GO:0007507	heart development	biological_process	0.00039329	0.014112		GO:0061061	muscle structure development	biological_process	0.00037685	0.013546
GO:0006754	ATP biosynthetic process	biological_process	0.00040317	0.014429		GO:0000779	condensed chromosome, centromeric region	cellular_component	0.00038655	0.01387
GO:0008630	intrinsic apoptotic signaling pathway in response to DNA damage	biological_process	0.0004035	0.014429		GO:0051099	positive regulation of binding	biological_process	0.00039012	0.013941
GO:0051301	cell division	biological_process	0.00041014	0.014641		GO:0031440	regulation of mRNA 3'-end processing	biological_process	0.00039019	0.013941
GO:0051649	establishment of localization in cell	biological_process	0.00041299	0.014717		GO:0000988	transcription factor activity, protein binding	molecular_function	0.00039053	0.013941
GO:0051054	positive regulation of DNA metabolic process	biological_process	0.00042622	0.015163		GO:1902583	multi-organism intracellular transport	biological_process	0.00039198	0.013968
GO:0031967	organelle envelope	cellular_component	0.00042914	0.015222		GO:0043487	regulation of RNA stability	biological_process	0.00039432	0.014028
GO:0035331	negative regulation of hippo signaling	biological_process	0.00042937	0.015222		GO:0016458	gene silencing	biological_process	0.00039871	0.01416
GO:0010717	regulation of epithelial to mesenchymal transition	biological_process	0.0004301	0.015222		GO:0035259	glucocorticoid receptor binding	molecular_function	0.0004024	0.014266
GO:0060900	embryonic camera-type eye formation	biological_process	0.00043382	0.015328		GO:0048638	regulation of developmental growth	biological_process	0.00040399	0.014298
GO:0019216	regulation of lipid metabolic process	biological_process	0.00043919	0.015491		GO:0016477	cell migration	biological_process	0.0004082	0.014422
GO:0044265	cellular macromolecule catabolic process	biological_process	0.00044219	0.01557		GO:0030029	actin filament-based process	biological_process	0.00042064	0.014817
GO:1904018	positive regulation of vasculature development	biological_process	0.00045211	0.015893		GO:0045732	positive regulation of protein catabolic process	biological_process	0.00042078	0.014817
GO:0005856	cytoskeleton	cellular_component	0.00046657	0.016349		GO:0000323	lytic vacuole	cellular_component	0.0004234	0.014858
GO:0006259	DNA metabolic process	biological_process	0.00046665	0.016349		GO:0005764	lysosome	cellular_component	0.0004234	0.014858
GO:1902806	regulation of cell cycle G1/S phase transition	biological_process	0.00047092	0.01647		GO:0009896	positive regulation of catabolic process	biological_process	0.0004275	0.014977
GO:0043086	negative regulation of catalytic activity	biological_process	0.0004909	0.01714		GO:0046794	transport of virus	biological_process	0.0004302	0.015046
GO:0042168	heme metabolic process	biological_process	0.0004998	0.017403		GO:0043488	regulation of mRNA stability	biological_process	0.00043123	0.015057
GO:0031975	envelope	cellular_component	0.0005001	0.017403		GO:0001933	negative regulation of protein phosphorylation	biological_process	0.00043245	0.015074
GO:0048729	tissue morphogenesis	biological_process	0.000502	0.01744		GO:0050792	regulation of viral process	biological_process	0.00043496	0.015136
GO:0050767	regulation of neurogenesis	biological_process	0.00050519	0.017521		GO:0010638	positive regulation of organelle organization	biological_process	0.00044336	0.015402
GO:0035456	response to interferon-beta	biological_process	0.00051086	0.017688		GO:0097306	cellular response to alcohol	biological_process	0.00044865	0.01556
GO:0001501	skeletal system development	biological_process	0.00051494	0.0178		GO:2001269	positive regulation of cysteine-type endopeptidase activity involved in apoptotic signaling pathway	biological_process	0.00044976	0.015564
GO:0072401	signal transduction involved in DNA integrity checkpoint	biological_process	0.00051836	0.017858		GO:0031298	replication fork protection complex	cellular_component	0.00045025	0.015564
GO:0072422	signal transduction involved in DNA damage checkpoint	biological_process	0.00051836	0.017858		GO:0000793	condensed chromosome	cellular_component	0.00045307	0.015627
GO:0009261	ribonucleotide catabolic process	biological_process	0.00051965	0.017873		GO:0007568	aging	biological_process	0.00045427	0.015627
GO:1901654	response to ketone	biological_process	0.00052196	0.017923		GO:0097193	intrinsic apoptotic signaling pathway	biological_process	0.00045435	0.015627
GO:0048662	negative regulation of smooth muscle cell proliferation	biological_process	0.00052421	0.017971		GO:0005911	cell-cell junction	cellular_component	0.00045529	0.015634
GO:1902582	single-organism intracellular transport	biological_process	0.00052616	0.017988		GO:0005138	interleukin-6 receptor binding	molecular_function	0.00045746	0.015682
GO:1901987	regulation of cell cycle phase transition	biological_process	0.00052644	0.017988		GO:0000776	kinetochore	cellular_component	0.00046232	0.015823
GO:0051213	dioxygenase activity	molecular_function	0.00053175	0.018139		GO:0034248	regulation of cellular amide metabolic process	biological_process	0.00046541	0.015874
GO:0022607	cellular component assembly	biological_process	0.00053298	0.018151		GO:0006338	chromatin remodeling	biological_process	0.00046582	0.015874
GO:0006783	heme biosynthetic process	biological_process	0.00054653	0.018582		GO:0000819	sister chromatid segregation	biological_process	0.00046612	0.015874
GO:0002009	morphogenesis of an epithelium	biological_process	0.00055776	0.018933		GO:0050681	androgen receptor binding	molecular_function	0.0004694	0.01596
GO:0032922	circadian regulation of gene expression	biological_process	0.00056532	0.019128		GO:0006353	DNA-templated transcription, termination	biological_process	0.00048362	0.016416
GO:0060537	muscle tissue development	biological_process	0.00056536	0.019128		GO:0006984	ER-nucleus signaling pathway	biological_process	0.00048523	0.016424
GO:0051348	negative regulation of transferase activity	biological_process	0.00057924	0.019566		GO:0060284	regulation of cell development	biological_process	0.00048544	0.016424
GO:0044770	cell cycle phase transition	biological_process	0.00058055	0.019578		GO:1903507	negative regulation of nucleic acid-templated transcription	biological_process	0.00048732	0.016461
GO:1903828	negative regulation of cellular protein localization	biological_process	0.00059612	0.020071		GO:0001047	core promoter binding	molecular_function	0.0005052	0.017037
GO:0003678	DNA helicase activity	molecular_function	0.00060401	0.020277		GO:0034599	cellular response to oxidative stress	biological_process	0.0005101	0.017174
GO:0016706	oxidoreductase activity, acting on paired donors, with incorporation or reduction of molecular oxygen, 2-oxoglutarate as one donor, and incorporation of one atom each of oxygen into both donors	molecular_function	0.00060421	0.020277		GO:0043620	regulation of DNA-templated transcription in response to stress	biological_process	0.00051569	0.017335
GO:0006260	DNA replication	biological_process	0.00060617	0.02031		GO:0006887	exocytosis	biological_process	0.0005272	0.017693
GO:0022008	neurogenesis	biological_process	0.00062445	0.020889		GO:1901203	positive regulation of extracellular matrix assembly	biological_process	0.00052917	0.017706
GO:0071383	cellular response to steroid hormone stimulus	biological_process	0.00062711	0.020944		GO:0019838	growth factor binding	molecular_function	0.00052929	0.017706
GO:0033365	protein localization to organelle	biological_process	0.00062864	0.020961		GO:0035098	ESC/E(Z) complex	cellular_component	0.00054312	0.018139
GO:0031960	response to corticosteroid	biological_process	0.00063332	0.021084		GO:1901655	cellular response to ketone	biological_process	0.00054523	0.01818
GO:0030336	negative regulation of cell migration	biological_process	0.00063758	0.021192		GO:1990234	transferase complex	cellular_component	0.00054677	0.018202
GO:0046683	response to organophosphorus	biological_process	0.00063956	0.021223		GO:0016192	vesicle-mediated transport	biological_process	0.00054891	0.018244
GO:0010243	response to organonitrogen compound	biological_process	0.00064155	0.021255		GO:0007399	nervous system development	biological_process	0.00055287	0.018347
GO:0043085	positive regulation of catalytic activity	biological_process	0.00067323	0.022269		GO:0048545	response to steroid hormone	biological_process	0.00056624	0.01876
GO:0072395	signal transduction involved in cell cycle checkpoint	biological_process	0.00067549	0.022306		GO:0031401	positive regulation of protein modification process	biological_process	0.0005732	0.01896
GO:0009612	response to mechanical stimulus	biological_process	0.00067649	0.022306		GO:0030334	regulation of cell migration	biological_process	0.00057554	0.019008
GO:0030100	regulation of endocytosis	biological_process	0.00067994	0.022384		GO:0031175	neuron projection development	biological_process	0.00058022	0.019132
GO:0016772	transferase activity, transferring phosphorus-containing groups	molecular_function	0.00068377	0.022475		GO:0045926	negative regulation of growth	biological_process	0.00058307	0.019195
GO:0022612	gland morphogenesis	biological_process	0.00069014	0.022648		GO:0022613	ribonucleoprotein complex biogenesis	biological_process	0.00058939	0.019372
GO:0033157	regulation of intracellular protein transport	biological_process	0.00069248	0.022689		GO:0045892	negative regulation of transcription, DNA-templated	biological_process	0.00059167	0.019417
GO:0008299	isoprenoid biosynthetic process	biological_process	0.00069449	0.022719		GO:0016055	Wnt signaling pathway	biological_process	0.00059275	0.019421
GO:0060840	artery development	biological_process	0.00069726	0.022758		GO:0070201	regulation of establishment of protein localization	biological_process	0.00059535	0.019445
GO:0034976	response to endoplasmic reticulum stress	biological_process	0.0006979	0.022758		GO:0035272	exocrine system development	biological_process	0.00059536	0.019445
GO:0045740	positive regulation of DNA replication	biological_process	0.00070104	0.022825		GO:0071230	cellular response to amino acid stimulus	biological_process	0.00060538	0.019741
GO:0090083	regulation of inclusion body assembly	biological_process	0.00070473	0.022909		GO:2001020	regulation of response to DNA damage stimulus	biological_process	0.00061079	0.019887
GO:0007417	central nervous system development	biological_process	0.00071379	0.023167		GO:0090005	negative regulation of establishment of protein localization to plasma membrane	biological_process	0.00061673	0.020048
GO:0019866	organelle inner membrane	cellular_component	0.00071571	0.023194		GO:0001763	morphogenesis of a branching structure	biological_process	0.00061938	0.020103
GO:0071241	cellular response to inorganic substance	biological_process	0.00072008	0.023299		GO:0031492	nucleosomal DNA binding	molecular_function	0.00062582	0.02028
GO:0034614	cellular response to reactive oxygen species	biological_process	0.00072599	0.023453		GO:0030424	axon	cellular_component	0.00063399	0.020513
GO:0030968	endoplasmic reticulum unfolded protein response	biological_process	0.00073659	0.023752		GO:0003712	transcription cofactor activity	molecular_function	0.00063553	0.020531
GO:0044772	mitotic cell cycle phase transition	biological_process	0.00073753	0.023752		GO:0048732	gland development	biological_process	0.00064692	0.020866
GO:0045666	positive regulation of neuron differentiation	biological_process	0.00075152	0.024165		GO:0051347	positive regulation of transferase activity	biological_process	0.00065404	0.021063
GO:1990267	response to transition metal nanoparticle	biological_process	0.00075743	0.024317		GO:0002020	protease binding	molecular_function	0.00065618	0.021099
GO:0070373	negative regulation of ERK1 and ERK2 cascade	biological_process	0.00076983	0.024677		GO:0016137	glycoside metabolic process	biological_process	0.0006634	0.021299
GO:0071902	positive regulation of protein serine/threonine kinase activity	biological_process	0.00077779	0.024894		GO:0040012	regulation of locomotion	biological_process	0.00066979	0.021471
GO:0016049	cell growth	biological_process	0.00079092	0.025247		GO:0036499	PERK-mediated unfolded protein response	biological_process	0.00067285	0.021481
GO:0032354	response to follicle-stimulating hormone	biological_process	0.0007923	0.025247		GO:0009266	response to temperature stimulus	biological_process	0.00067578	0.021481
GO:0002931	response to ischemia	biological_process	0.00079246	0.025247		GO:0043085	positive regulation of catalytic activity	biological_process	0.00067621	0.021481
GO:0031647	regulation of protein stability	biological_process	0.0008076	0.02569		GO:0030638	polyketide metabolic process	biological_process	0.00067633	0.021481
GO:0072431	signal transduction involved in mitotic G1 DNA damage checkpoint	biological_process	0.0008155	0.025832		GO:0044597	daunorubicin metabolic process	biological_process	0.00067633	0.021481
GO:1902400	intracellular signal transduction involved in G1 DNA damage checkpoint	biological_process	0.0008155	0.025832		GO:0044598	doxorubicin metabolic process	biological_process	0.00067633	0.021481
GO:0071496	cellular response to external stimulus	biological_process	0.00081743	0.025832		GO:0000245	spliceosomal complex assembly	biological_process	0.00069229	0.021954
GO:0014910	regulation of smooth muscle cell migration	biological_process	0.0008176	0.025832		GO:0033674	positive regulation of kinase activity	biological_process	0.000701	0.022197
GO:0036296	response to increased oxygen levels	biological_process	0.00081955	0.025832		GO:0003779	actin binding	molecular_function	0.00070735	0.022338
GO:0055093	response to hyperoxia	biological_process	0.00081955	0.025832		GO:0060560	developmental growth involved in morphogenesis	biological_process	0.00070763	0.022338
GO:0040008	regulation of growth	biological_process	0.00082195	0.025868		GO:0000731	DNA synthesis involved in DNA repair	biological_process	0.00071505	0.022509
GO:0070997	neuron death	biological_process	0.00083367	0.026198		GO:0051052	regulation of DNA metabolic process	biological_process	0.00071571	0.022509
GO:0006606	protein import into nucleus	biological_process	0.00083839	0.026198		GO:0046902	regulation of mitochondrial membrane permeability	biological_process	0.00071628	0.022509
GO:0044744	protein targeting to nucleus	biological_process	0.00083839	0.026198		GO:0000989	transcription factor activity, transcription factor binding	molecular_function	0.00072499	0.022748
GO:1902593	single-organism nuclear import	biological_process	0.00083839	0.026198		GO:0003713	transcription coactivator activity	molecular_function	0.0007317	0.022924
GO:0051241	negative regulation of multicellular organismal process	biological_process	0.00084177	0.026198		GO:0047485	protein N-terminus binding	molecular_function	0.00073776	0.023079
GO:1903561	extracellular vesicle	cellular_component	0.00084193	0.026198		GO:0031400	negative regulation of protein modification process	biological_process	0.00074108	0.023148
GO:0010770	positive regulation of cell morphogenesis involved in differentiation	biological_process	0.00084209	0.026198		GO:0032870	cellular response to hormone stimulus	biological_process	0.00074533	0.023245
GO:0051384	response to glucocorticoid	biological_process	0.00084253	0.026198		GO:0006839	mitochondrial transport	biological_process	0.00074916	0.023285
GO:0044707	single-multicellular organism process	biological_process	0.00084951	0.026361		GO:2000026	regulation of multicellular organismal development	biological_process	0.00074973	0.023285
GO:0070062	extracellular exosome	cellular_component	0.00085032	0.026361		GO:0042221	response to chemical	biological_process	0.00075083	0.023285
GO:0043230	extracellular organelle	cellular_component	0.000864	0.026745		GO:0050896	response to stimulus	biological_process	0.00075108	0.023285
GO:0018210	peptidyl-threonine modification	biological_process	0.00086598	0.026767		GO:0031252	cell leading edge	cellular_component	0.00075536	0.023382
GO:0065010	extracellular membrane-bounded organelle	cellular_component	0.00087263	0.026909		GO:0046782	regulation of viral transcription	biological_process	0.00076072	0.023498
GO:0010039	response to iron ion	biological_process	0.00087319	0.026909		GO:0050769	positive regulation of neurogenesis	biological_process	0.00076137	0.023498
GO:0033674	positive regulation of kinase activity	biological_process	0.00088949	0.027371		GO:0035967	cellular response to topologically incorrect protein	biological_process	0.00076673	0.023628
GO:0048699	generation of neurons	biological_process	0.00090016	0.027623		GO:0071560	cellular response to transforming growth factor beta stimulus	biological_process	0.00077017	0.023669
GO:0043566	structure-specific DNA binding	molecular_function	0.00090104	0.027623		GO:0005657	replication fork	cellular_component	0.00077034	0.023669
GO:0033044	regulation of chromosome organization	biological_process	0.00090232	0.027623		GO:0035966	response to topologically incorrect protein	biological_process	0.00077335	0.023727
GO:2000045	regulation of G1/S transition of mitotic cell cycle	biological_process	0.000903	0.027623		GO:0007052	mitotic spindle organization	biological_process	0.00079085	0.024228
GO:0010769	regulation of cell morphogenesis involved in differentiation	biological_process	0.00090819	0.027701		GO:0043009	chordate embryonic development	biological_process	0.00082705	0.025299
GO:0043457	regulation of cellular respiration	biological_process	0.00090927	0.027701		GO:0010976	positive regulation of neuron projection development	biological_process	0.0008345	0.02549
GO:1901990	regulation of mitotic cell cycle phase transition	biological_process	0.00090955	0.027701		GO:0090559	regulation of membrane permeability	biological_process	0.00083729	0.025537
GO:0009201	ribonucleoside triphosphate biosynthetic process	biological_process	0.00091122	0.027711		GO:0071774	response to fibroblast growth factor	biological_process	0.0008549	0.026036
GO:0004674	protein serine/threonine kinase activity	molecular_function	0.0009237	0.028037		GO:0050767	regulation of neurogenesis	biological_process	0.00085826	0.0261
GO:0071897	DNA biosynthetic process	biological_process	0.00092464	0.028037		GO:0044766	multi-organism transport	biological_process	0.00086643	0.026272
GO:0050839	cell adhesion molecule binding	molecular_function	0.00092734	0.028077		GO:1902579	multi-organism localization	biological_process	0.00086643	0.026272
GO:0034715	pICln-Sm protein complex	cellular_component	0.00093903	0.02839		GO:0044087	regulation of cellular component biogenesis	biological_process	0.00090368	0.027361
GO:0048863	stem cell differentiation	biological_process	0.00094236	0.028413		GO:0048025	negative regulation of mRNA splicing, via spliceosome	biological_process	0.00090653	0.027407
GO:0014031	mesenchymal cell development	biological_process	0.00094411	0.028413		GO:0019220	regulation of phosphate metabolic process	biological_process	0.0009176	0.027702
GO:0014074	response to purine-containing compound	biological_process	0.00094522	0.028413		GO:0051170	nuclear import	biological_process	0.00092177	0.027787
GO:0051603	proteolysis involved in cellular protein catabolic process	biological_process	0.00094527	0.028413		GO:1902110	positive regulation of mitochondrial membrane permeability involved in apoptotic process	biological_process	0.00092493	0.027801
GO:0016051	carbohydrate biosynthetic process	biological_process	0.00096438	0.028945		GO:1902686	mitochondrial outer membrane permeabilization involved in programmed cell death	biological_process	0.00092493	0.027801
GO:0045837	negative regulation of membrane potential	biological_process	0.00097565	0.029241		GO:0007169	transmembrane receptor protein tyrosine kinase signaling pathway	biological_process	0.00092803	0.027854
GO:0000981	RNA polymerase II transcription factor activity, sequence-specific DNA binding	molecular_function	0.00097711	0.029243		GO:0009792	embryo development ending in birth or egg hatching	biological_process	0.00094035	0.028183
GO:0071248	cellular response to metal ion	biological_process	0.00098511	0.02944		GO:0071359	cellular response to dsRNA	biological_process	0.00094977	0.02842
GO:0048598	embryonic morphogenesis	biological_process	0.0010152	0.030296		GO:0030307	positive regulation of cell growth	biological_process	0.000951	0.02842
GO:0098798	mitochondrial protein complex	cellular_component	0.0010209	0.030422		GO:0005663	DNA replication factor C complex	cellular_component	0.00095258	0.028427
GO:0043154	negative regulation of cysteine-type endopeptidase activity involved in apoptotic process	biological_process	0.0010252	0.030506		GO:0045684	positive regulation of epidermis development	biological_process	0.00097006	0.028907
GO:0034249	negative regulation of cellular amide metabolic process	biological_process	0.0010284	0.030558		GO:0005791	rough endoplasmic reticulum	cellular_component	0.00097603	0.029043
GO:0034329	cell junction assembly	biological_process	0.001038	0.030799		GO:0003158	endothelium development	biological_process	0.00097746	0.029044
GO:0000988	transcription factor activity, protein binding	molecular_function	0.0010472	0.031027		GO:0048588	developmental cell growth	biological_process	0.0009806	0.029095
GO:0034620	cellular response to unfolded protein	biological_process	0.0010506	0.031085		GO:0097296	activation of cysteine-type endopeptidase activity involved in apoptotic signaling pathway	biological_process	0.00098653	0.02923
GO:0051962	positive regulation of nervous system development	biological_process	0.0010539	0.031137		GO:0006596	polyamine biosynthetic process	biological_process	0.00099363	0.029398
GO:0043433	negative regulation of sequence-specific DNA binding transcription factor activity	biological_process	0.0010596	0.031261		GO:0016891	endoribonuclease activity, producing 5'-phosphomonoesters	molecular_function	0.00099529	0.029405
GO:0016874	ligase activity	molecular_function	0.0010656	0.031391		GO:0001046	core promoter sequence-specific DNA binding	molecular_function	0.00099724	0.029421
GO:2000146	negative regulation of cell motility	biological_process	0.001068	0.031418		GO:0016925	protein sumoylation	biological_process	0.0010067	0.029659
GO:0048008	platelet-derived growth factor receptor signaling pathway	biological_process	0.0010778	0.031663		GO:0016772	transferase activity, transferring phosphorus-containing groups	molecular_function	0.0010189	0.029975
GO:0007010	cytoskeleton organization	biological_process	0.0010848	0.031822		GO:1902807	negative regulation of cell cycle G1/S phase transition	biological_process	0.0010204	0.029977
GO:0060324	face development	biological_process	0.001089	0.031887		GO:1902931	negative regulation of alcohol biosynthetic process	biological_process	0.0010458	0.03068
GO:0035258	steroid hormone receptor binding	molecular_function	0.0010901	0.031887		GO:1902679	negative regulation of RNA biosynthetic process	biological_process	0.0010524	0.030828
GO:0046777	protein autophosphorylation	biological_process	0.0011016	0.03218		GO:0072528	pyrimidine-containing compound biosynthetic process	biological_process	0.0010561	0.030893
GO:0007093	mitotic cell cycle checkpoint	biological_process	0.0011057	0.032245		GO:0048536	spleen development	biological_process	0.0010596	0.030948
GO:0043161	proteasome-mediated ubiquitin-dependent protein catabolic process	biological_process	0.0011076	0.032245		GO:0071559	response to transforming growth factor beta	biological_process	0.001061	0.030948
GO:0032355	response to estradiol	biological_process	0.0011085	0.032245		GO:1902749	regulation of cell cycle G2/M phase transition	biological_process	0.0010738	0.031272
GO:0090051	negative regulation of cell migration involved in sprouting angiogenesis	biological_process	0.0011241	0.032651		GO:0001701	in utero embryonic development	biological_process	0.0010759	0.031272
GO:0006120	mitochondrial electron transport, NADH to ubiquinone	biological_process	0.001129	0.032748		GO:0034329	cell junction assembly	biological_process	0.0010766	0.031272
GO:0035591	signaling adaptor activity	molecular_function	0.0011308	0.032756		GO:0043603	cellular amide metabolic process	biological_process	0.0010783	0.031279
GO:0098609	cell-cell adhesion	biological_process	0.001146	0.033148		GO:1903310	positive regulation of chromatin modification	biological_process	0.001095	0.03172
GO:0042594	response to starvation	biological_process	0.0011497	0.033209		GO:0006289	nucleotide-excision repair	biological_process	0.0011235	0.032454
GO:0009895	negative regulation of catabolic process	biological_process	0.001156	0.033347		GO:0022008	neurogenesis	biological_process	0.0011265	0.032454
GO:0003344	pericardium morphogenesis	biological_process	0.0011615	0.033459		GO:0071867	response to monoamine	biological_process	0.0011267	0.032454
GO:0090407	organophosphate biosynthetic process	biological_process	0.0011656	0.03353		GO:0071869	response to catecholamine	biological_process	0.0011267	0.032454
GO:0033673	negative regulation of kinase activity	biological_process	0.0011981	0.034418		GO:0048699	generation of neurons	biological_process	0.0011335	0.032592
GO:0044712	single-organism catabolic process	biological_process	0.0012113	0.034712		GO:0005741	mitochondrial outer membrane	cellular_component	0.0011356	0.032592
GO:2001234	negative regulation of apoptotic signaling pathway	biological_process	0.0012117	0.034712		GO:0006367	transcription initiation from RNA polymerase II promoter	biological_process	0.0011371	0.032592
GO:1900744	regulation of p38MAPK cascade	biological_process	0.0012341	0.035304		GO:0051984	positive regulation of chromosome segregation	biological_process	0.0011377	0.032592
GO:0048568	embryonic organ development	biological_process	0.0012386	0.035382		GO:0006929	substrate-dependent cell migration	biological_process	0.0011495	0.032884
GO:0045766	positive regulation of angiogenesis	biological_process	0.0012454	0.035528		GO:0008630	intrinsic apoptotic signaling pathway in response to DNA damage	biological_process	0.0011538	0.032962
GO:0043010	camera-type eye development	biological_process	0.0012472	0.035533		GO:1903828	negative regulation of cellular protein localization	biological_process	0.0011557	0.03297
GO:0045787	positive regulation of cell cycle	biological_process	0.0012749	0.03627		GO:0031344	regulation of cell projection organization	biological_process	0.0011752	0.033479
GO:0031099	regeneration	biological_process	0.0012768	0.036275		GO:0009611	response to wounding	biological_process	0.0011768	0.03348
GO:0031545	peptidyl-proline 4-dioxygenase activity	molecular_function	0.0012799	0.036291		GO:0046872	metal ion binding	molecular_function	0.0011873	0.033732
GO:0000375	RNA splicing, via transesterification reactions	biological_process	0.0012809	0.036291		GO:0007080	mitotic metaphase plate congression	biological_process	0.0011966	0.033949
GO:0000976	transcription regulatory region sequence-specific DNA binding	molecular_function	0.0012848	0.036354		GO:0034504	protein localization to nucleus	biological_process	0.0012067	0.03419
GO:0018193	peptidyl-amino acid modification	biological_process	0.0012901	0.036453		GO:1901201	regulation of extracellular matrix assembly	biological_process	0.0012134	0.034314
GO:0035924	cellular response to vascular endothelial growth factor stimulus	biological_process	0.0012993	0.036663		GO:0031441	negative regulation of mRNA 3'-end processing	biological_process	0.0012153	0.034314
GO:0010608	posttranscriptional regulation of gene expression	biological_process	0.0013037	0.036738		GO:0045664	regulation of neuron differentiation	biological_process	0.001216	0.034314
GO:2000573	positive regulation of DNA biosynthetic process	biological_process	0.0013073	0.03679		GO:0008094	DNA-dependent ATPase activity	molecular_function	0.0012188	0.034344
GO:0051101	regulation of DNA binding	biological_process	0.0013317	0.037426		GO:0048285	organelle fission	biological_process	0.0012209	0.034357
GO:0045444	fat cell differentiation	biological_process	0.0013485	0.037845		GO:0072527	pyrimidine-containing compound metabolic process	biological_process	0.0012375	0.034777
GO:0061136	regulation of proteasomal protein catabolic process	biological_process	0.0013513	0.037872		GO:0009887	organ morphogenesis	biological_process	0.0012401	0.034802
GO:1990316	ATG1/UKL1 kinase complex	cellular_component	0.0013648	0.038198		GO:0060445	branching involved in salivary gland morphogenesis	biological_process	0.0012507	0.035053
GO:0006270	DNA replication initiation	biological_process	0.0013691	0.03827		GO:0007063	regulation of sister chromatid cohesion	biological_process	0.0012619	0.035318
GO:0042802	identical protein binding	molecular_function	0.0013855	0.038676		GO:0010810	regulation of cell-substrate adhesion	biological_process	0.0012785	0.035736
GO:0000287	magnesium ion binding	molecular_function	0.001401	0.039007		GO:1902591	single-organism membrane budding	biological_process	0.0012879	0.035949
GO:0005681	spliceosomal complex	cellular_component	0.0014012	0.039007		GO:0001837	epithelial to mesenchymal transition	biological_process	0.0012953	0.03611
GO:0043405	regulation of MAP kinase activity	biological_process	0.001411	0.039227		GO:1903900	regulation of viral life cycle	biological_process	0.0013099	0.036465
GO:0006644	phospholipid metabolic process	biological_process	0.0014165	0.039327		GO:0006297	nucleotide-excision repair, DNA gap filling	biological_process	0.0013179	0.036641
GO:0055123	digestive system development	biological_process	0.0014229	0.039436		GO:0016787	hydrolase activity	molecular_function	0.0013216	0.03666
GO:0031669	cellular response to nutrient levels	biological_process	0.0014242	0.039436		GO:2001233	regulation of apoptotic signaling pathway	biological_process	0.0013239	0.03666
GO:0048711	positive regulation of astrocyte differentiation	biological_process	0.001433	0.039628		GO:0006275	regulation of DNA replication	biological_process	0.0013239	0.03666
GO:0043116	negative regulation of vascular permeability	biological_process	0.0014381	0.039716		GO:0071868	cellular response to monoamine stimulus	biological_process	0.0013374	0.036917
GO:0000075	cell cycle checkpoint	biological_process	0.0014461	0.039884		GO:0071870	cellular response to catecholamine stimulus	biological_process	0.0013374	0.036917
GO:2000117	negative regulation of cysteine-type endopeptidase activity	biological_process	0.0014494	0.039898		GO:0016874	ligase activity	molecular_function	0.0013386	0.036917
GO:0031966	mitochondrial membrane	cellular_component	0.0014505	0.039898		GO:0030036	actin cytoskeleton organization	biological_process	0.0013448	0.037041
GO:0007420	brain development	biological_process	0.0014558	0.039957		GO:0031497	chromatin assembly	biological_process	0.0013542	0.037249
GO:0031571	mitotic G1 DNA damage checkpoint	biological_process	0.0014584	0.039957		GO:0014069	postsynaptic density	cellular_component	0.001363	0.037443
GO:0044819	mitotic G1/S transition checkpoint	biological_process	0.0014584	0.039957		GO:0009950	dorsal/ventral axis specification	biological_process	0.0013678	0.037523
GO:0071243	cellular response to arsenic-containing substance	biological_process	0.0014603	0.039957		GO:0051129	negative regulation of cellular component organization	biological_process	0.0013851	0.037941
GO:0044452	nucleolar part	cellular_component	0.0014659	0.040056		GO:0030529	ribonucleoprotein complex	cellular_component	0.0013866	0.037941
GO:0048471	perinuclear region of cytoplasm	cellular_component	0.0014697	0.040109		GO:0006508	proteolysis	biological_process	0.0013912	0.038016
GO:0005815	microtubule organizing center	cellular_component	0.0014865	0.040461		GO:0005520	insulin-like growth factor binding	molecular_function	0.0014009	0.038231
GO:2000116	regulation of cysteine-type endopeptidase activity	biological_process	0.0014866	0.040461		GO:0044215	other organism	cellular_component	0.0014152	0.038469
GO:0006109	regulation of carbohydrate metabolic process	biological_process	0.0014988	0.04074		GO:0044216	other organism cell	cellular_component	0.0014152	0.038469
GO:0035967	cellular response to topologically incorrect protein	biological_process	0.0015046	0.040844		GO:0044217	other organism part	cellular_component	0.0014152	0.038469
GO:0004003	ATP-dependent DNA helicase activity	molecular_function	0.0015129	0.041017		GO:0007160	cell-matrix adhesion	biological_process	0.0014304	0.038831
GO:0048864	stem cell development	biological_process	0.001537	0.041512		GO:0033119	negative regulation of RNA splicing	biological_process	0.0014334	0.038861
GO:0072332	intrinsic apoptotic signaling pathway by p53 class mediator	biological_process	0.0015376	0.041512		GO:0060216	definitive hemopoiesis	biological_process	0.0014374	0.038918
GO:0080134	regulation of response to stress	biological_process	0.0015378	0.041512		GO:0045860	positive regulation of protein kinase activity	biological_process	0.0014456	0.039089
GO:0012505	endomembrane system	cellular_component	0.0015408	0.041512		GO:0000380	alternative mRNA splicing, via spliceosome	biological_process	0.0014702	0.039704
GO:0001836	release of cytochrome c from mitochondria	biological_process	0.0015412	0.041512		GO:0035601	protein deacylation	biological_process	0.001479	0.039849
GO:0018126	protein hydroxylation	biological_process	0.001553	0.041761		GO:0005783	endoplasmic reticulum	cellular_component	0.0014795	0.039849
GO:0051591	response to cAMP	biological_process	0.0015549	0.041761		GO:0010647	positive regulation of cell communication	biological_process	0.0014922	0.040139
GO:1903533	regulation of protein targeting	biological_process	0.0015565	0.041761		GO:0050678	regulation of epithelial cell proliferation	biological_process	0.001501	0.040307
GO:0048565	digestive tract development	biological_process	0.0015649	0.041933		GO:0007050	cell cycle arrest	biological_process	0.0015023	0.040307
GO:0004672	protein kinase activity	molecular_function	0.0015675	0.041948		GO:0004521	endoribonuclease activity	molecular_function	0.0015078	0.040404
GO:0033036	macromolecule localization	biological_process	0.001582	0.042283		GO:0030968	endoplasmic reticulum unfolded protein response	biological_process	0.0015346	0.041069
GO:0048010	vascular endothelial growth factor receptor signaling pathway	biological_process	0.0015842	0.042287		GO:1902415	regulation of mRNA binding	biological_process	0.0015429	0.041236
GO:0031065	positive regulation of histone deacetylation	biological_process	0.0015895	0.042373		GO:0018995	host	cellular_component	0.0015481	0.041271
GO:0000377	RNA splicing, via transesterification reactions with bulged adenosine as nucleophile	biological_process	0.0015955	0.042423		GO:0043657	host cell	cellular_component	0.0015481	0.041271
GO:0000398	mRNA splicing, via spliceosome	biological_process	0.0015955	0.042423		GO:1903308	regulation of chromatin modification	biological_process	0.001578	0.042012
GO:0030850	prostate gland development	biological_process	0.001614	0.042861		GO:1990138	neuron projection extension	biological_process	0.0015915	0.042317
GO:0043281	regulation of cysteine-type endopeptidase activity involved in apoptotic process	biological_process	0.001624	0.043037		GO:0070997	neuron death	biological_process	0.001613	0.042834
GO:0090090	negative regulation of canonical Wnt signaling pathway	biological_process	0.001625	0.043037		GO:0007264	small GTPase mediated signal transduction	biological_process	0.0016189	0.042936
GO:0010799	regulation of peptidyl-threonine phosphorylation	biological_process	0.0016274	0.043037		GO:0001726	ruffle	cellular_component	0.0016293	0.043155
GO:0090049	regulation of cell migration involved in sprouting angiogenesis	biological_process	0.0016289	0.043037		GO:0010799	regulation of peptidyl-threonine phosphorylation	biological_process	0.0016325	0.043187
GO:0007517	muscle organ development	biological_process	0.0016456	0.043422		GO:0045931	positive regulation of mitotic cell cycle	biological_process	0.0016407	0.043349
GO:0070542	response to fatty acid	biological_process	0.0016508	0.043503		GO:1903649	regulation of cytoplasmic transport	biological_process	0.0016462	0.043438
GO:0031418	L-ascorbic acid binding	molecular_function	0.0016535	0.043519		GO:0000902	cell morphogenesis	biological_process	0.0016539	0.043585
GO:0007584	response to nutrient	biological_process	0.0016618	0.043682		GO:0044437	vacuolar part	cellular_component	0.0016606	0.043707
GO:0000989	transcription factor activity, transcription factor binding	molecular_function	0.0016753	0.043957		GO:0034250	positive regulation of cellular amide metabolic process	biological_process	0.0016746	0.044018
GO:0045333	cellular respiration	biological_process	0.0016771	0.043957		GO:0006986	response to unfolded protein	biological_process	0.0016875	0.044302
GO:0051402	neuron apoptotic process	biological_process	0.0016786	0.043957		GO:0042623	ATPase activity, coupled	molecular_function	0.0017015	0.044566
GO:0043632	modification-dependent macromolecule catabolic process	biological_process	0.0017056	0.044609		GO:0051294	establishment of spindle orientation	biological_process	0.0017018	0.044566
GO:0071384	cellular response to corticosteroid stimulus	biological_process	0.0017099	0.044664		GO:1901566	organonitrogen compound biosynthetic process	biological_process	0.0017104	0.044734
GO:0051592	response to calcium ion	biological_process	0.0017314	0.045169		GO:0006333	chromatin assembly or disassembly	biological_process	0.0017308	0.04521
GO:0031543	peptidyl-proline dioxygenase activity	molecular_function	0.0017439	0.045439		GO:0061041	regulation of wound healing	biological_process	0.0017357	0.045282
GO:0009636	response to toxic substance	biological_process	0.0017492	0.045518		GO:1903053	regulation of extracellular matrix organization	biological_process	0.0017484	0.045474
GO:0042451	purine nucleoside biosynthetic process	biological_process	0.0017621	0.045728		GO:0007179	transforming growth factor beta receptor signaling pathway	biological_process	0.0017493	0.045474
GO:0046129	purine ribonucleoside biosynthetic process	biological_process	0.0017621	0.045728		GO:0042175	nuclear outer membrane-endoplasmic reticulum membrane network	cellular_component	0.0017497	0.045474
GO:0044783	G1 DNA damage checkpoint	biological_process	0.0017639	0.045728		GO:0071824	protein-DNA complex subunit organization	biological_process	0.0017612	0.045717
GO:0030308	negative regulation of cell growth	biological_process	0.0017932	0.04643		GO:0098732	macromolecule deacylation	biological_process	0.0017664	0.045794
GO:0006977	DNA damage response, signal transduction by p53 class mediator resulting in cell cycle arrest	biological_process	0.0018211	0.047053		GO:0035794	positive regulation of mitochondrial membrane permeability	biological_process	0.0017758	0.045979
GO:0005161	platelet-derived growth factor receptor binding	molecular_function	0.0018218	0.047053		GO:0033627	cell adhesion mediated by integrin	biological_process	0.001789	0.046264
GO:0004386	helicase activity	molecular_function	0.0018252	0.047084		GO:1901888	regulation of cell junction assembly	biological_process	0.0018052	0.046625
GO:0045898	regulation of RNA polymerase II transcriptional preinitiation complex assembly	biological_process	0.0018339	0.047248		GO:0097345	mitochondrial outer membrane permeabilization	biological_process	0.0018154	0.04683
GO:0009267	cellular response to starvation	biological_process	0.0018687	0.048086		GO:0050812	regulation of acyl-CoA biosynthetic process	biological_process	0.0018213	0.046923
GO:0006778	porphyrin-containing compound metabolic process	biological_process	0.0018765	0.048227		GO:0044432	endoplasmic reticulum part	cellular_component	0.0018632	0.047943
GO:0071372	cellular response to follicle-stimulating hormone stimulus	biological_process	0.0018797	0.04825		GO:2001235	positive regulation of apoptotic signaling pathway	biological_process	0.0018742	0.048168
GO:1901216	positive regulation of neuron death	biological_process	0.0019041	0.048814		GO:0031491	nucleosome binding	molecular_function	0.0018992	0.04875
GO:0031668	cellular response to extracellular stimulus	biological_process	0.0019184	0.049121		GO:0001844	protein insertion into mitochondrial membrane involved in apoptotic signaling pathway	biological_process	0.00191	0.048966
GO:1901655	cellular response to ketone	biological_process	0.0019303	0.049363		GO:0003684	damaged DNA binding	molecular_function	0.0019137	0.049001
GO:0051960	regulation of nervous system development	biological_process	0.0019716	0.050358		GO:0031047	gene silencing by RNA	biological_process	0.0019587	0.05009
GO:1904019	epithelial cell apoptotic process	biological_process	0.001979	0.050486		GO:0072594	establishment of protein localization to organelle	biological_process	0.001962	0.050112
GO:1903364	positive regulation of cellular protein catabolic process	biological_process	0.0019855	0.050588		GO:0007041	lysosomal transport	biological_process	0.0019888	0.050674
GO:1901522	positive regulation of transcription from RNA polymerase II promoter involved in cellular response to chemical stimulus	biological_process	0.001995	0.050769		GO:0018393	internal peptidyl-lysine acetylation	biological_process	0.0019889	0.050674
GO:0043933	macromolecular complex subunit organization	biological_process	0.0020122	0.051143		GO:0030178	negative regulation of Wnt signaling pathway	biological_process	0.0019999	0.050894
GO:1903050	regulation of proteolysis involved in cellular protein catabolic process	biological_process	0.0020151	0.051154		GO:0048666	neuron development	biological_process	0.0020065	0.050999
GO:1900181	negative regulation of protein localization to nucleus	biological_process	0.0020278	0.051414		GO:0051493	regulation of cytoskeleton organization	biological_process	0.0020181	0.051139
GO:0060828	regulation of canonical Wnt signaling pathway	biological_process	0.0020661	0.052321		GO:0046104	thymidine metabolic process	biological_process	0.0020194	0.051139
GO:0030182	neuron differentiation	biological_process	0.0020693	0.052338		GO:0046125	pyrimidine deoxyribonucleoside metabolic process	biological_process	0.0020194	0.051139
GO:0043604	amide biosynthetic process	biological_process	0.0020885	0.052759		GO:0007250	activation of NF-kappaB-inducing kinase activity	biological_process	0.0020274	0.051277
GO:1901699	cellular response to nitrogen compound	biological_process	0.0021022	0.053041		GO:0007167	enzyme linked receptor protein signaling pathway	biological_process	0.0020351	0.051314
GO:0005740	mitochondrial envelope	cellular_component	0.0021192	0.053405		GO:0060546	negative regulation of necroptotic process	biological_process	0.0020361	0.051314
GO:0034405	response to fluid shear stress	biological_process	0.002144	0.053964		GO:0030647	aminoglycoside antibiotic metabolic process	biological_process	0.0020362	0.051314
GO:0048762	mesenchymal cell differentiation	biological_process	0.0021616	0.054342		GO:0031410	cytoplasmic vesicle	cellular_component	0.0020428	0.051416
GO:0010821	regulation of mitochondrion organization	biological_process	0.002171	0.054453		GO:0032989	cellular component morphogenesis	biological_process	0.0020453	0.051419
GO:0043043	peptide biosynthetic process	biological_process	0.0021713	0.054453		GO:2000134	negative regulation of G1/S transition of mitotic cell cycle	biological_process	0.0020673	0.051909
GO:0051972	regulation of telomerase activity	biological_process	0.0021889	0.054827		GO:0043903	regulation of symbiosis, encompassing mutualism through parasitism	biological_process	0.0020718	0.051958
GO:0031396	regulation of protein ubiquitination	biological_process	0.0021962	0.054945		GO:0016573	histone acetylation	biological_process	0.0020802	0.052083
GO:0043534	blood vessel endothelial cell migration	biological_process	0.0022076	0.055164		GO:0045787	positive regulation of cell cycle	biological_process	0.0020831	0.052083
GO:0010675	regulation of cellular carbohydrate metabolic process	biological_process	0.0022262	0.055562		GO:0043618	regulation of transcription from RNA polymerase II promoter in response to stress	biological_process	0.0020843	0.052083
GO:0060541	respiratory system development	biological_process	0.0022365	0.05575		GO:0007155	cell adhesion	biological_process	0.0020872	0.052092
GO:1903671	negative regulation of sprouting angiogenesis	biological_process	0.0022631	0.056348		GO:0010807	regulation of synaptic vesicle priming	biological_process	0.0020916	0.052139
GO:0022900	electron transport chain	biological_process	0.0022822	0.056754		GO:2000045	regulation of G1/S transition of mitotic cell cycle	biological_process	0.0021044	0.052396
GO:0097191	extrinsic apoptotic signaling pathway	biological_process	0.0022981	0.057082		GO:0045727	positive regulation of translation	biological_process	0.0021209	0.052743
GO:2000278	regulation of DNA biosynthetic process	biological_process	0.0023218	0.057563		GO:0006417	regulation of translation	biological_process	0.0021265	0.052789
GO:0033273	response to vitamin	biological_process	0.002323	0.057563		GO:0016082	synaptic vesicle priming	biological_process	0.0021279	0.052789
GO:0006750	glutathione biosynthetic process	biological_process	0.002379	0.058878		GO:0061086	negative regulation of histone H3-K27 methylation	biological_process	0.0021333	0.05282
GO:0006596	polyamine biosynthetic process	biological_process	0.0023931	0.059132		GO:0045444	fat cell differentiation	biological_process	0.0021342	0.05282
GO:0019941	modification-dependent protein catabolic process	biological_process	0.0023959	0.059132		GO:1902533	positive regulation of intracellular signal transduction	biological_process	0.0021383	0.052859
GO:0030335	positive regulation of cell migration	biological_process	0.0023978	0.059132		GO:1901698	response to nitrogen compound	biological_process	0.0021409	0.052859
GO:0048144	fibroblast proliferation	biological_process	0.0024045	0.059228		GO:0090066	regulation of anatomical structure size	biological_process	0.002173	0.05359
GO:2000177	regulation of neural precursor cell proliferation	biological_process	0.0024154	0.059424		GO:0016081	synaptic vesicle docking	biological_process	0.0021882	0.0539
GO:0030178	negative regulation of Wnt signaling pathway	biological_process	0.0024589	0.060425		GO:0030532	small nuclear ribonucleoprotein complex	cellular_component	0.0022001	0.054128
GO:0046902	regulation of mitochondrial membrane permeability	biological_process	0.002463	0.060452		GO:0040013	negative regulation of locomotion	biological_process	0.0022234	0.054627
GO:0032403	protein complex binding	molecular_function	0.0024674	0.06049		GO:0085029	extracellular matrix assembly	biological_process	0.0022262	0.054627
GO:0008026	ATP-dependent helicase activity	molecular_function	0.0024763	0.060565		GO:0022610	biological adhesion	biological_process	0.0022283	0.054627
GO:0070035	purine NTP-dependent helicase activity	molecular_function	0.0024763	0.060565		GO:0031648	protein destabilization	biological_process	0.0022444	0.054956
GO:0032137	guanine/thymine mispair binding	molecular_function	0.0024975	0.060957		GO:0044420	extracellular matrix component	cellular_component	0.0022476	0.05497
GO:0032501	multicellular organismal process	biological_process	0.0025005	0.060957		GO:0006409	tRNA export from nucleus	biological_process	0.0022529	0.05497
GO:0006469	negative regulation of protein kinase activity	biological_process	0.0025012	0.060957		GO:0071431	tRNA-containing ribonucleoprotein complex export from nucleus	biological_process	0.0022529	0.05497
GO:0003682	chromatin binding	molecular_function	0.0025281	0.061541		GO:0007079	mitotic chromosome movement towards spindle pole	biological_process	0.0022649	0.055136
GO:0045599	negative regulation of fat cell differentiation	biological_process	0.0025617	0.062286		GO:0031331	positive regulation of cellular catabolic process	biological_process	0.0022663	0.055136
GO:0032991	macromolecular complex	cellular_component	0.0025817	0.062698		GO:0018394	peptidyl-lysine acetylation	biological_process	0.0022677	0.055136
GO:0035246	peptidyl-arginine N-methylation	biological_process	0.0025935	0.062911		GO:1903350	response to dopamine	biological_process	0.0022846	0.055417
GO:0006508	proteolysis	biological_process	0.0026013	0.063027		GO:1903351	cellular response to dopamine	biological_process	0.0022846	0.055417
GO:0015980	energy derivation by oxidation of organic compounds	biological_process	0.0026109	0.063187		GO:0070513	death domain binding	molecular_function	0.0022997	0.055718
GO:0018107	peptidyl-threonine phosphorylation	biological_process	0.0026415	0.063753		GO:0061659	ubiquitin-like protein ligase activity	molecular_function	0.0023176	0.056088
GO:0022604	regulation of cell morphogenesis	biological_process	0.0026423	0.063753		GO:1901214	regulation of neuron death	biological_process	0.0023339	0.056416
GO:0005732	small nucleolar ribonucleoprotein complex	cellular_component	0.0026436	0.063753		GO:0051782	negative regulation of cell division	biological_process	0.0023559	0.056855
GO:0030983	mismatched DNA binding	molecular_function	0.0026483	0.063793		GO:0042177	negative regulation of protein catabolic process	biological_process	0.0023614	0.056855
GO:0009118	regulation of nucleoside metabolic process	biological_process	0.0026642	0.064026		GO:0034620	cellular response to unfolded protein	biological_process	0.0023615	0.056855
GO:1903578	regulation of ATP metabolic process	biological_process	0.0026642	0.064026		GO:0035257	nuclear hormone receptor binding	molecular_function	0.002363	0.056855
GO:0043034	costamere	cellular_component	0.0026683	0.064052		GO:0060971	embryonic heart tube left/right pattern formation	biological_process	0.0023702	0.056963
GO:0071385	cellular response to glucocorticoid stimulus	biological_process	0.0026839	0.064242		GO:0044421	extracellular region part	cellular_component	0.0023765	0.057015
GO:0017085	response to insecticide	biological_process	0.0026848	0.064242		GO:2000116	regulation of cysteine-type endopeptidase activity	biological_process	0.0023779	0.057015
GO:0030323	respiratory tube development	biological_process	0.0026855	0.064242		GO:0016301	kinase activity	molecular_function	0.0024029	0.057547
GO:1903146	regulation of mitophagy	biological_process	0.0027317	0.065271		GO:0006605	protein targeting	biological_process	0.0024065	0.057568
GO:1903984	positive regulation of TRAIL-activated apoptotic signaling pathway	biological_process	0.0027534	0.065714		GO:0001968	fibronectin binding	molecular_function	0.0024141	0.057683
GO:0072655	establishment of protein localization to mitochondrion	biological_process	0.0027963	0.066661		GO:0016796	exonuclease activity, active with either ribo- or deoxyribonucleic acids and producing 5'-phosphomonoesters	molecular_function	0.0024192	0.057737
GO:0001558	regulation of cell growth	biological_process	0.002805	0.066741		GO:0046914	transition metal ion binding	molecular_function	0.0024239	0.057783
GO:0009142	nucleoside triphosphate biosynthetic process	biological_process	0.0028061	0.066741		GO:0046822	regulation of nucleocytoplasmic transport	biological_process	0.0024375	0.058041
GO:0046165	alcohol biosynthetic process	biological_process	0.0028412	0.067499		GO:1903077	negative regulation of protein localization to plasma membrane	biological_process	0.0024527	0.058268
GO:0016887	ATPase activity	molecular_function	0.0028453	0.067518		GO:1904376	negative regulation of protein localization to cell periphery	biological_process	0.0024527	0.058268
GO:0006886	intracellular protein transport	biological_process	0.0028605	0.067802		GO:0034728	nucleosome organization	biological_process	0.0024785	0.058814
GO:0004114	3',5'-cyclic-nucleotide phosphodiesterase activity	molecular_function	0.0028835	0.068268		GO:0071360	cellular response to exogenous dsRNA	biological_process	0.0024861	0.058894
GO:0019902	phosphatase binding	molecular_function	0.0028987	0.06855		GO:0032526	response to retinoic acid	biological_process	0.0024875	0.058894
GO:0040017	positive regulation of locomotion	biological_process	0.0029213	0.069006		GO:2000278	regulation of DNA biosynthetic process	biological_process	0.0024958	0.059022
GO:0006352	DNA-templated transcription, initiation	biological_process	0.0029289	0.069108		GO:0006606	protein import into nucleus	biological_process	0.0025166	0.059312
GO:0030029	actin filament-based process	biological_process	0.00295	0.069527		GO:0044744	protein targeting to nucleus	biological_process	0.0025166	0.059312
GO:0031570	DNA integrity checkpoint	biological_process	0.0029659	0.069821		GO:1902593	single-organism nuclear import	biological_process	0.0025166	0.059312
GO:0000910	cytokinesis	biological_process	0.0029861	0.070217		GO:0006513	protein monoubiquitination	biological_process	0.0025619	0.060312
GO:0051091	positive regulation of sequence-specific DNA binding transcription factor activity	biological_process	0.0030138	0.070753		GO:0052547	regulation of peptidase activity	biological_process	0.0025768	0.060554
GO:0034644	cellular response to UV	biological_process	0.0030157	0.070753		GO:0072577	endothelial cell apoptotic process	biological_process	0.0025781	0.060554
GO:0021872	forebrain generation of neurons	biological_process	0.0030562	0.071623		GO:0043281	regulation of cysteine-type endopeptidase activity involved in apoptotic process	biological_process	0.002581	0.060554
GO:0090068	positive regulation of cell cycle process	biological_process	0.0031146	0.072908		GO:0005773	vacuole	cellular_component	0.0025854	0.060589
GO:0050679	positive regulation of epithelial cell proliferation	biological_process	0.0031278	0.073057		GO:0098644	complex of collagen trimers	cellular_component	0.0026165	0.061249
GO:0010801	negative regulation of peptidyl-threonine phosphorylation	biological_process	0.003128	0.073057		GO:1902275	regulation of chromatin organization	biological_process	0.0026231	0.061334
GO:0070273	phosphatidylinositol-4-phosphate binding	molecular_function	0.0031506	0.073442		GO:0000777	condensed chromosome kinetochore	cellular_component	0.0026471	0.061824
GO:1901800	positive regulation of proteasomal protein catabolic process	biological_process	0.0031515	0.073442		GO:0000403	Y-form DNA binding	molecular_function	0.002654	0.061916
GO:0043467	regulation of generation of precursor metabolites and energy	biological_process	0.0031576	0.0735		GO:0006476	protein deacetylation	biological_process	0.0026607	0.062003
GO:0060512	prostate gland morphogenesis	biological_process	0.0031719	0.07375		GO:0043280	positive regulation of cysteine-type endopeptidase activity involved in apoptotic process	biological_process	0.0026674	0.06209
GO:0031952	regulation of protein autophosphorylation	biological_process	0.0032039	0.07441		GO:0000904	cell morphogenesis involved in differentiation	biological_process	0.0026859	0.062451
GO:0019511	peptidyl-proline hydroxylation	biological_process	0.0032102	0.074474		GO:0045446	endothelial cell differentiation	biological_process	0.002707	0.062871
GO:0010594	regulation of endothelial cell migration	biological_process	0.0032286	0.074818		GO:0009967	positive regulation of signal transduction	biological_process	0.002741	0.063537
GO:0072132	mesenchyme morphogenesis	biological_process	0.0032419	0.07504		GO:0050770	regulation of axonogenesis	biological_process	0.0027418	0.063537
GO:0004687	myosin light chain kinase activity	molecular_function	0.0032521	0.075192		GO:0050685	positive regulation of mRNA processing	biological_process	0.0027462	0.063568
GO:0050681	androgen receptor binding	molecular_function	0.0032589	0.075266		GO:0031638	zymogen activation	biological_process	0.0027501	0.063585
GO:0006511	ubiquitin-dependent protein catabolic process	biological_process	0.0033011	0.076157		GO:0051223	regulation of protein transport	biological_process	0.0027734	0.064054
GO:0034505	tooth mineralization	biological_process	0.0033613	0.07746		GO:0030336	negative regulation of cell migration	biological_process	0.0027901	0.064369
GO:2000147	positive regulation of cell motility	biological_process	0.0033696	0.077564		GO:0031346	positive regulation of cell projection organization	biological_process	0.0028075	0.064698
GO:1902287	semaphorin-plexin signaling pathway involved in axon guidance	biological_process	0.0034455	0.079223		GO:0004518	nuclease activity	molecular_function	0.0028595	0.065822
GO:1901214	regulation of neuron death	biological_process	0.0034496	0.07923		GO:0006900	membrane budding	biological_process	0.0028667	0.065914
GO:0050678	regulation of epithelial cell proliferation	biological_process	0.0034584	0.079345		GO:1902494	catalytic complex	cellular_component	0.0028827	0.06621
GO:0021537	telencephalon development	biological_process	0.0034696	0.079514		GO:0060056	mammary gland involution	biological_process	0.0028955	0.06643
GO:0002262	myeloid cell homeostasis	biological_process	0.0034872	0.079828		GO:0051204	protein insertion into mitochondrial membrane	biological_process	0.0029015	0.066495
GO:0051272	positive regulation of cellular component movement	biological_process	0.0035151	0.080378		GO:0005819	spindle	cellular_component	0.0029146	0.066721
GO:0019919	peptidyl-arginine methylation, to asymmetrical-dimethyl arginine	biological_process	0.0035202	0.080406		GO:0090501	RNA phosphodiester bond hydrolysis	biological_process	0.0029928	0.068436
GO:1903829	positive regulation of cellular protein localization	biological_process	0.0035454	0.080894		GO:0098651	basement membrane collagen trimer	cellular_component	0.0029997	0.068516
GO:0032451	demethylase activity	molecular_function	0.003572	0.081389		GO:0032486	Rap protein signal transduction	biological_process	0.0030156	0.068805
GO:0000209	protein polyubiquitination	biological_process	0.0035788	0.081389		GO:1903320	regulation of protein modification by small protein conjugation or removal	biological_process	0.0030298	0.069053
GO:1901292	nucleoside phosphate catabolic process	biological_process	0.0035789	0.081389		GO:0044295	axonal growth cone	cellular_component	0.0030477	0.069385
GO:0097345	mitochondrial outer membrane permeabilization	biological_process	0.0035952	0.081658		GO:0061035	regulation of cartilage development	biological_process	0.0030561	0.0695
GO:2001251	negative regulation of chromosome organization	biological_process	0.0035986	0.081658		GO:1902532	negative regulation of intracellular signal transduction	biological_process	0.0031253	0.070996
GO:0051095	regulation of helicase activity	biological_process	0.0036128	0.08189		GO:0007077	mitotic nuclear envelope disassembly	biological_process	0.0031555	0.071602
GO:1902911	protein kinase complex	cellular_component	0.003625	0.081998		GO:0048193	Golgi vesicle transport	biological_process	0.0031832	0.072152
GO:0060043	regulation of cardiac muscle cell proliferation	biological_process	0.0036255	0.081998		GO:0023056	positive regulation of signaling	biological_process	0.0031901	0.072179
GO:0010565	regulation of cellular ketone metabolic process	biological_process	0.0036441	0.082295		GO:0043169	cation binding	molecular_function	0.0031913	0.072179
GO:0050812	regulation of acyl-CoA biosynthetic process	biological_process	0.003647	0.082295		GO:0017038	protein import	biological_process	0.0032334	0.07305
GO:1902170	cellular response to reactive nitrogen species	biological_process	0.0036526	0.082295		GO:0031490	chromatin DNA binding	molecular_function	0.0032407	0.073137
GO:2000637	positive regulation of gene silencing by miRNA	biological_process	0.0036545	0.082295		GO:0046620	regulation of organ growth	biological_process	0.0032553	0.073386
GO:2000369	regulation of clathrin-mediated endocytosis	biological_process	0.003663	0.082397		GO:0004693	cyclin-dependent protein serine/threonine kinase activity	molecular_function	0.0032983	0.074193
GO:0070585	protein localization to mitochondrion	biological_process	0.0036814	0.082722		GO:0097472	cyclin-dependent protein kinase activity	molecular_function	0.0032983	0.074193
GO:0043406	positive regulation of MAP kinase activity	biological_process	0.0036901	0.082828		GO:0022411	cellular component disassembly	biological_process	0.0033061	0.074288
GO:0051049	regulation of transport	biological_process	0.0037204	0.083418		GO:0061630	ubiquitin protein ligase activity	molecular_function	0.0033112	0.074323
GO:0061035	regulation of cartilage development	biological_process	0.0037244	0.083418		GO:0034616	response to laminar fluid shear stress	biological_process	0.0033269	0.074595
GO:0006417	regulation of translation	biological_process	0.003752	0.083913		GO:0003688	DNA replication origin binding	molecular_function	0.0033404	0.074679
GO:0000077	DNA damage checkpoint	biological_process	0.0037546	0.083913		GO:1902108	regulation of mitochondrial membrane permeability involved in apoptotic process	biological_process	0.0033496	0.074679
GO:0030855	epithelial cell differentiation	biological_process	0.0037734	0.084233		GO:0031624	ubiquitin conjugating enzyme binding	molecular_function	0.0033511	0.074679
GO:2000736	regulation of stem cell differentiation	biological_process	0.0037771	0.084233		GO:0060544	regulation of necroptotic process	biological_process	0.0033565	0.074679
GO:0043114	regulation of vascular permeability	biological_process	0.0038125	0.084845		GO:0034470	ncRNA processing	biological_process	0.0033568	0.074679
GO:0035257	nuclear hormone receptor binding	molecular_function	0.0038127	0.084845		GO:0071417	cellular response to organonitrogen compound	biological_process	0.003357	0.074679
GO:0006271	DNA strand elongation involved in DNA replication	biological_process	0.0038322	0.085188		GO:0046825	regulation of protein export from nucleus	biological_process	0.0033626	0.074679
GO:0051193	regulation of cofactor metabolic process	biological_process	0.0038559	0.085366		GO:0051604	protein maturation	biological_process	0.0033641	0.074679
GO:0051196	regulation of coenzyme metabolic process	biological_process	0.0038559	0.085366		GO:0060337	type I interferon signaling pathway	biological_process	0.0033667	0.074679
GO:0051427	hormone receptor binding	molecular_function	0.0038576	0.085366		GO:0071357	cellular response to type I interferon	biological_process	0.0033667	0.074679
GO:0022904	respiratory electron transport chain	biological_process	0.0038589	0.085366		GO:0001934	positive regulation of protein phosphorylation	biological_process	0.0033827	0.074954
GO:0004112	cyclic-nucleotide phosphodiesterase activity	molecular_function	0.0038608	0.085366		GO:0008543	fibroblast growth factor receptor signaling pathway	biological_process	0.0034056	0.075382
GO:0008216	spermidine metabolic process	biological_process	0.0038741	0.085569		GO:2000351	regulation of endothelial cell apoptotic process	biological_process	0.0034097	0.075392
GO:0035282	segmentation	biological_process	0.0038878	0.08578		GO:1903313	positive regulation of mRNA metabolic process	biological_process	0.0034168	0.075462
GO:0090306	spindle assembly involved in meiosis	biological_process	0.0039386	0.086808		GO:0000288	nuclear-transcribed mRNA catabolic process, deadenylation-dependent decay	biological_process	0.0034202	0.075462
GO:1902108	regulation of mitochondrial membrane permeability involved in apoptotic process	biological_process	0.0039442	0.086839		GO:0005587	collagen type IV trimer	cellular_component	0.0034265	0.07552
GO:2001235	positive regulation of apoptotic signaling pathway	biological_process	0.003951	0.086896		GO:0034660	ncRNA metabolic process	biological_process	0.0034356	0.075553
GO:0090199	regulation of release of cytochrome c from mitochondria	biological_process	0.0039648	0.087107		GO:0005789	endoplasmic reticulum membrane	cellular_component	0.0034383	0.075553
GO:0043523	regulation of neuron apoptotic process	biological_process	0.0040156	0.08813		GO:0010563	negative regulation of phosphorus metabolic process	biological_process	0.0034425	0.075553
GO:0034248	regulation of cellular amide metabolic process	biological_process	0.0040323	0.088403		GO:0045936	negative regulation of phosphate metabolic process	biological_process	0.0034425	0.075553
GO:0042592	homeostatic process	biological_process	0.0040546	0.088799		GO:0000381	regulation of alternative mRNA splicing, via spliceosome	biological_process	0.0034521	0.075684
GO:0097285	cell-type specific apoptotic process	biological_process	0.0040624	0.088877		GO:0043254	regulation of protein complex assembly	biological_process	0.0034828	0.07625
GO:0006629	lipid metabolic process	biological_process	0.0041073	0.089764		GO:0050680	negative regulation of epithelial cell proliferation	biological_process	0.0034853	0.07625
GO:0060317	cardiac epithelial to mesenchymal transition	biological_process	0.0041136	0.089805		GO:0042327	positive regulation of phosphorylation	biological_process	0.0035167	0.076856
GO:0043565	sequence-specific DNA binding	molecular_function	0.0041729	0.091005		GO:0042769	DNA damage response, detection of DNA damage	biological_process	0.0035204	0.076856
GO:0035455	response to interferon-alpha	biological_process	0.0041802	0.091069		GO:0019216	regulation of lipid metabolic process	biological_process	0.0035411	0.077227
GO:0043506	regulation of JUN kinase activity	biological_process	0.0041937	0.091268		GO:0048027	mRNA 5'-UTR binding	molecular_function	0.0035454	0.077238
GO:0043603	cellular amide metabolic process	biological_process	0.0042463	0.092314		GO:0000226	microtubule cytoskeleton organization	biological_process	0.0035652	0.077588
GO:0000153	cytoplasmic ubiquitin ligase complex	cellular_component	0.0042652	0.092629		GO:0048144	fibroblast proliferation	biological_process	0.0035919	0.078088
GO:0006779	porphyrin-containing compound biosynthetic process	biological_process	0.0043106	0.093507		GO:0097067	cellular response to thyroid hormone stimulus	biological_process	0.0036215	0.078644
GO:0006376	mRNA splice site selection	biological_process	0.0043147	0.093507		GO:2001056	positive regulation of cysteine-type endopeptidase activity	biological_process	0.0036268	0.078644
GO:0060341	regulation of cellular localization	biological_process	0.0043789	0.094644		GO:0060317	cardiac epithelial to mesenchymal transition	biological_process	0.0036291	0.078644
GO:0006534	cysteine metabolic process	biological_process	0.0043795	0.094644		GO:0006611	protein export from nucleus	biological_process	0.0036327	0.078644
GO:0050821	protein stabilization	biological_process	0.0043808	0.094644		GO:0000287	magnesium ion binding	molecular_function	0.0036484	0.07875
GO:0006002	fructose 6-phosphate metabolic process	biological_process	0.0043961	0.094876		GO:0008655	pyrimidine-containing compound salvage	biological_process	0.0036489	0.07875
GO:1902110	positive regulation of mitochondrial membrane permeability involved in apoptotic process	biological_process	0.0044166	0.095119		GO:0043097	pyrimidine nucleoside salvage	biological_process	0.0036489	0.07875
GO:1902686	mitochondrial outer membrane permeabilization involved in programmed cell death	biological_process	0.0044166	0.095119		GO:0006901	vesicle coating	biological_process	0.0036622	0.078954
GO:1904589	regulation of protein import	biological_process	0.0044771	0.096324		GO:0022618	ribonucleoprotein complex assembly	biological_process	0.0036729	0.079102
GO:0004514	nicotinate-nucleotide diphosphorylase (carboxylating) activity	molecular_function	0.004505	0.096724		GO:0004529	exodeoxyribonuclease activity	molecular_function	0.0036902	0.079271
GO:0070647	protein modification by small protein conjugation or removal	biological_process	0.0045051	0.096724		GO:0016895	exodeoxyribonuclease activity, producing 5'-phosphomonoesters	molecular_function	0.0036902	0.079271
GO:0010976	positive regulation of neuron projection development	biological_process	0.0045233	0.097016		GO:0000280	nuclear division	biological_process	0.0036936	0.079271
GO:0071398	cellular response to fatty acid	biological_process	0.0045426	0.097328		GO:0034340	response to type I interferon	biological_process	0.003696	0.079271
GO:0060426	lung vasculature development	biological_process	0.0045945	0.098339		GO:0070734	histone H3-K27 methylation	biological_process	0.0037011	0.079298
GO:0070841	inclusion body assembly	biological_process	0.0046098	0.098564		GO:0070412	R-SMAD binding	molecular_function	0.0037138	0.079488
GO:0030155	regulation of cell adhesion	biological_process	0.0046152	0.098577		GO:0031058	positive regulation of histone modification	biological_process	0.0037368	0.079899
GO:0001654	eye development	biological_process	0.0046334	0.098864		GO:0060828	regulation of canonical Wnt signaling pathway	biological_process	0.003791	0.080974
GO:0000243	commitment complex	cellular_component	0.0046642	0.099419		GO:0030426	growth cone	cellular_component	0.0038399	0.081933
GO:0032091	negative regulation of protein binding	biological_process	0.0046864	0.099651		GO:0050673	epithelial cell proliferation	biological_process	0.0038615	0.082288
GO:0032872	regulation of stress-activated MAPK cascade	biological_process	0.0046986	0.099651		GO:0019080	viral gene expression	biological_process	0.0038671	0.082288
GO:0016273	arginine N-methyltransferase activity	molecular_function	0.0046998	0.099651		GO:0009445	putrescine metabolic process	biological_process	0.0038684	0.082288
GO:0016274	protein-arginine N-methyltransferase activity	molecular_function	0.0046998	0.099651		GO:0040023	establishment of nucleus localization	biological_process	0.0038781	0.0824
GO:0048145	regulation of fibroblast proliferation	biological_process	0.004702	0.099651		GO:0051668	localization within membrane	biological_process	0.0038878	0.0824
GO:0036312	phosphatidylinositol 3-kinase regulatory subunit binding	molecular_function	0.0047039	0.099651		GO:0048008	platelet-derived growth factor receptor signaling pathway	biological_process	0.003889	0.0824
GO:0042826	histone deacetylase binding	molecular_function	0.0047669	0.10082		GO:0051031	tRNA transport	biological_process	0.0038896	0.0824
GO:0000977	RNA polymerase II regulatory region sequence-specific DNA binding	molecular_function	0.0047688	0.10082		GO:0060612	adipose tissue development	biological_process	0.0039022	0.082583
GO:0014067	negative regulation of phosphatidylinositol 3-kinase signaling	biological_process	0.0047822	0.101		GO:0071549	cellular response to dexamethasone stimulus	biological_process	0.0039398	0.083289
GO:0051099	positive regulation of binding	biological_process	0.0048176	0.10164		GO:0051348	negative regulation of transferase activity	biological_process	0.0039436	0.083289
GO:0006482	protein demethylation	biological_process	0.0048318	0.10174		GO:0004540	ribonuclease activity	molecular_function	0.0039607	0.083566
GO:0008214	protein dealkylation	biological_process	0.0048318	0.10174		GO:1902555	endoribonuclease complex	cellular_component	0.0039958	0.08422
GO:0007219	Notch signaling pathway	biological_process	0.0048628	0.10226		GO:2000146	negative regulation of cell motility	biological_process	0.0040078	0.084387
GO:0090559	regulation of membrane permeability	biological_process	0.0048665	0.10226		GO:0044429	mitochondrial part	cellular_component	0.0040486	0.085161
GO:0045978	negative regulation of nucleoside metabolic process	biological_process	0.0048973	0.1027		GO:0045666	positive regulation of neuron differentiation	biological_process	0.0040685	0.085491
GO:1903579	negative regulation of ATP metabolic process	biological_process	0.0048973	0.1027		GO:0036003	positive regulation of transcription from RNA polymerase II promoter in response to stress	biological_process	0.0041027	0.086123
GO:0017111	nucleoside-triphosphatase activity	molecular_function	0.0049135	0.10294		GO:0002011	morphogenesis of an epithelial sheet	biological_process	0.0041491	0.08701
GO:0061053	somite development	biological_process	0.0049521	0.10364		GO:0051239	regulation of multicellular organismal process	biological_process	0.0041761	0.087488
GO:0006518	peptide metabolic process	biological_process	0.0049698	0.10388		GO:0090150	establishment of protein localization to membrane	biological_process	0.004262	0.089196
GO:0051493	regulation of cytoskeleton organization	biological_process	0.0049735	0.10388		GO:0051960	regulation of nervous system development	biological_process	0.0042884	0.089658
GO:0006066	alcohol metabolic process	biological_process	0.0049936	0.10413		GO:0060070	canonical Wnt signaling pathway	biological_process	0.0043037	0.089888
GO:0005747	mitochondrial respiratory chain complex I	cellular_component	0.0050057	0.10413		GO:0006475	internal protein amino acid acetylation	biological_process	0.0043463	0.090686
GO:0030964	NADH dehydrogenase complex	cellular_component	0.0050057	0.10413		GO:0051402	neuron apoptotic process	biological_process	0.0043689	0.091066
GO:0045271	respiratory chain complex I	cellular_component	0.0050057	0.10413		GO:0043142	single-stranded DNA-dependent ATPase activity	molecular_function	0.0043843	0.091282
GO:0045646	regulation of erythrocyte differentiation	biological_process	0.0050506	0.10496		GO:0060425	lung morphogenesis	biological_process	0.0043881	0.091282
GO:0061029	eyelid development in camera-type eye	biological_process	0.0050776	0.10541		GO:0071902	positive regulation of protein serine/threonine kinase activity	biological_process	0.0044144	0.091737
GO:0043073	germ cell nucleus	cellular_component	0.0050829	0.10542		GO:0045773	positive regulation of axon extension	biological_process	0.004425	0.091867
GO:0048048	embryonic eye morphogenesis	biological_process	0.0051324	0.10634		GO:1904036	negative regulation of epithelial cell apoptotic process	biological_process	0.0044365	0.092012
GO:0014706	striated muscle tissue development	biological_process	0.0051584	0.10677		GO:0044700	single organism signaling	biological_process	0.004494	0.093113
GO:0070302	regulation of stress-activated protein kinase signaling cascade	biological_process	0.0051683	0.10687		GO:0043005	neuron projection	cellular_component	0.0045196	0.09355
GO:0043234	protein complex	cellular_component	0.005185	0.10711		GO:0030135	coated vesicle	cellular_component	0.0045455	0.093992
GO:0046501	protoporphyrinogen IX metabolic process	biological_process	0.0052158	0.10743		GO:0042555	MCM complex	cellular_component	0.0045524	0.09404
GO:0019184	nonribosomal peptide biosynthetic process	biological_process	0.0052177	0.10743		GO:0001667	ameboidal-type cell migration	biological_process	0.0045629	0.094164
GO:0014909	smooth muscle cell migration	biological_process	0.0052185	0.10743		GO:0005768	endosome	cellular_component	0.0045712	0.094241
GO:0006810	transport	biological_process	0.0052245	0.10743		GO:0006595	polyamine metabolic process	biological_process	0.0045782	0.094268
GO:0007006	mitochondrial membrane organization	biological_process	0.0052266	0.10743		GO:0016773	phosphotransferase activity, alcohol group as acceptor	molecular_function	0.0045816	0.094268
GO:0001046	core promoter sequence-specific DNA binding	molecular_function	0.0052484	0.10769		GO:0015631	tubulin binding	molecular_function	0.004621	0.094984
GO:0003006	developmental process involved in reproduction	biological_process	0.0052496	0.10769		GO:0051015	actin filament binding	molecular_function	0.0046516	0.095519
GO:0016055	Wnt signaling pathway	biological_process	0.0052558	0.10771		GO:0044712	single-organism catabolic process	biological_process	0.0046569	0.095534
GO:0060627	regulation of vesicle-mediated transport	biological_process	0.0052683	0.10786		GO:0007517	muscle organ development	biological_process	0.0046786	0.095855
GO:0043409	negative regulation of MAPK cascade	biological_process	0.0052842	0.10799		GO:0051983	regulation of chromosome segregation	biological_process	0.0046822	0.095855
GO:0015630	microtubule cytoskeleton	cellular_component	0.0052852	0.10799		GO:0046078	dUMP metabolic process	biological_process	0.0046864	0.095855
GO:2000772	regulation of cellular senescence	biological_process	0.0053022	0.10824		GO:0090504	epiboly	biological_process	0.0047156	0.096356
GO:0051051	negative regulation of transport	biological_process	0.0053117	0.10832		GO:0065004	protein-DNA complex assembly	biological_process	0.0047283	0.096521
GO:1903052	positive regulation of proteolysis involved in cellular protein catabolic process	biological_process	0.0053259	0.10851		GO:0032801	receptor catabolic process	biological_process	0.0047879	0.097448
GO:0043153	entrainment of circadian clock by photoperiod	biological_process	0.0053479	0.10885		GO:0048870	cell motility	biological_process	0.0047937	0.097448
GO:0051234	establishment of localization	biological_process	0.0053564	0.10891		GO:0051674	localization of cell	biological_process	0.0047937	0.097448
GO:0038127	ERBB signaling pathway	biological_process	0.0053693	0.10907		GO:0071826	ribonucleoprotein complex subunit organization	biological_process	0.0047963	0.097448
GO:0032787	monocarboxylic acid metabolic process	biological_process	0.0054002	0.10959		GO:0035064	methylated histone binding	molecular_function	0.0047983	0.097448
GO:1901861	regulation of muscle tissue development	biological_process	0.0054054	0.10959		GO:0030182	neuron differentiation	biological_process	0.0048019	0.097448
GO:0035023	regulation of Rho protein signal transduction	biological_process	0.0054143	0.10966		GO:2001267	regulation of cysteine-type endopeptidase activity involved in apoptotic signaling pathway	biological_process	0.0048077	0.09747
GO:0043627	response to estrogen	biological_process	0.005444	0.11015		GO:0034405	response to fluid shear stress	biological_process	0.0048217	0.097658
GO:0035239	tube morphogenesis	biological_process	0.005461	0.11039		GO:0043923	positive regulation by host of viral transcription	biological_process	0.0048727	0.098596
GO:0034616	response to laminar fluid shear stress	biological_process	0.0054936	0.11094		GO:0051216	cartilage development	biological_process	0.004884	0.098726
GO:0060412	ventricular septum morphogenesis	biological_process	0.0055234	0.11143		GO:0031072	heat shock protein binding	molecular_function	0.0048949	0.098851
GO:0005667	transcription factor complex	cellular_component	0.0055364	0.11159		GO:0035455	response to interferon-alpha	biological_process	0.0049096	0.099052
GO:0008380	RNA splicing	biological_process	0.0055489	0.11173		GO:0007034	vacuolar transport	biological_process	0.0049401	0.09957
GO:1902285	semaphorin-plexin signaling pathway involved in neuron projection guidance	biological_process	0.0055567	0.11178		GO:0023052	signaling	biological_process	0.0049476	0.099624
GO:0010573	vascular endothelial growth factor production	biological_process	0.0055746	0.11203		GO:0006888	ER to Golgi vesicle-mediated transport	biological_process	0.0049799	0.10018
GO:0001012	RNA polymerase II regulatory region DNA binding	molecular_function	0.0056073	0.11258		GO:0051271	negative regulation of cellular component movement	biological_process	0.0049918	0.10032
GO:0042771	intrinsic apoptotic signaling pathway in response to DNA damage by p53 class mediator	biological_process	0.0056307	0.11291		GO:0030427	site of polarized growth	cellular_component	0.0050396	0.10118
GO:0035330	regulation of hippo signaling	biological_process	0.0056346	0.11291		GO:0034097	response to cytokine	biological_process	0.0050468	0.10123
GO:0060148	positive regulation of posttranscriptional gene silencing	biological_process	0.0056524	0.11314		GO:0051240	positive regulation of multicellular organismal process	biological_process	0.0050596	0.10129
GO:0005743	mitochondrial inner membrane	cellular_component	0.0056568	0.11314		GO:0004003	ATP-dependent DNA helicase activity	molecular_function	0.0050676	0.10129
GO:0003707	steroid hormone receptor activity	molecular_function	0.0056913	0.11367		GO:0010952	positive regulation of peptidase activity	biological_process	0.0050713	0.10129
GO:0046914	transition metal ion binding	molecular_function	0.0056945	0.11367		GO:0055024	regulation of cardiac muscle tissue development	biological_process	0.0050772	0.10129
GO:0030234	enzyme regulator activity	molecular_function	0.0057378	0.11443		GO:0061085	regulation of histone H3-K27 methylation	biological_process	0.0050773	0.10129
GO:0016879	ligase activity, forming carbon-nitrogen bonds	molecular_function	0.0057438	0.11443		GO:0005769	early endosome	cellular_component	0.0050794	0.10129
GO:0008094	DNA-dependent ATPase activity	molecular_function	0.0057509	0.11447		GO:0006086	acetyl-CoA biosynthetic process from pyruvate	biological_process	0.005127	0.10215
GO:0051188	cofactor biosynthetic process	biological_process	0.0057674	0.11469		GO:0007006	mitochondrial membrane organization	biological_process	0.0051451	0.10241
GO:0007044	cell-substrate junction assembly	biological_process	0.0057734	0.11469		GO:1990752	microtubule end	cellular_component	0.0051531	0.10247
GO:2000178	negative regulation of neural precursor cell proliferation	biological_process	0.005798	0.11507		GO:0010389	regulation of G2/M transition of mitotic cell cycle	biological_process	0.0051852	0.10301
GO:0030324	lung development	biological_process	0.0058089	0.11518		GO:0048568	embryonic organ development	biological_process	0.0051921	0.10305
GO:0035035	histone acetyltransferase binding	molecular_function	0.0058217	0.11532		GO:2000674	regulation of type B pancreatic cell apoptotic process	biological_process	0.005222	0.10354
GO:0051183	vitamin transporter activity	molecular_function	0.0058364	0.1155		GO:0090502	RNA phosphodiester bond hydrolysis, endonucleolytic	biological_process	0.0052396	0.10379
GO:0031100	organ regeneration	biological_process	0.0058745	0.11608		GO:0048584	positive regulation of response to stimulus	biological_process	0.0052539	0.10389
GO:0019798	procollagen-proline dioxygenase activity	molecular_function	0.0058765	0.11608		GO:0051147	regulation of muscle cell differentiation	biological_process	0.0052546	0.10389
GO:0051220	cytoplasmic sequestering of protein	biological_process	0.005944	0.1173		GO:0097525	spliceosomal snRNP complex	cellular_component	0.0052696	0.10409
GO:0009166	nucleotide catabolic process	biological_process	0.0059904	0.11802		GO:0097202	activation of cysteine-type endopeptidase activity	biological_process	0.0052787	0.10413
GO:0051973	positive regulation of telomerase activity	biological_process	0.005992	0.11802		GO:0002062	chondrocyte differentiation	biological_process	0.0052816	0.10413
GO:0055072	iron ion homeostasis	biological_process	0.0060012	0.11809		GO:0034614	cellular response to reactive oxygen species	biological_process	0.0052944	0.10421
GO:0060349	bone morphogenesis	biological_process	0.0060077	0.1181		GO:0046621	negative regulation of organ growth	biological_process	0.0052959	0.10421
GO:0060394	negative regulation of pathway-restricted SMAD protein phosphorylation	biological_process	0.0060153	0.11814		GO:0097191	extrinsic apoptotic signaling pathway	biological_process	0.0053191	0.10455
GO:0060574	intestinal epithelial cell maturation	biological_process	0.0060273	0.11826		GO:0090287	regulation of cellular response to growth factor stimulus	biological_process	0.0053231	0.10455
GO:0010989	negative regulation of low-density lipoprotein particle clearance	biological_process	0.0060757	0.1191		GO:1901659	glycosyl compound biosynthetic process	biological_process	0.0053533	0.10504
GO:0034719	SMN-Sm protein complex	cellular_component	0.0062085	0.12151		GO:0051095	regulation of helicase activity	biological_process	0.0053909	0.10568
GO:0060485	mesenchyme development	biological_process	0.0062102	0.12151		GO:0060379	cardiac muscle cell myoblast differentiation	biological_process	0.0053966	0.10569
GO:0042306	regulation of protein import into nucleus	biological_process	0.0062208	0.1216		GO:0016023	cytoplasmic membrane-bounded vesicle	cellular_component	0.0054173	0.106
GO:0001556	oocyte maturation	biological_process	0.0062371	0.1218		GO:0010510	regulation of acetyl-CoA biosynthetic process from pyruvate	biological_process	0.0054274	0.10609
GO:0005759	mitochondrial matrix	cellular_component	0.0062599	0.12214		GO:0000244	spliceosomal tri-snRNP complex assembly	biological_process	0.0054541	0.10651
GO:1902652	secondary alcohol metabolic process	biological_process	0.0062908	0.12262		GO:0043174	nucleoside salvage	biological_process	0.0054751	0.10682
GO:0016462	pyrophosphatase activity	molecular_function	0.0063072	0.12283		GO:0051783	regulation of nuclear division	biological_process	0.0055043	0.10729
GO:0001077	transcriptional activator activity, RNA polymerase II core promoter proximal region sequence-specific binding	molecular_function	0.0063136	0.12284		GO:0030030	cell projection organization	biological_process	0.0055264	0.10762
GO:0019207	kinase regulator activity	molecular_function	0.0063213	0.12287		GO:0048754	branching morphogenesis of an epithelial tube	biological_process	0.0055525	0.10803
GO:0006290	pyrimidine dimer repair	biological_process	0.0063292	0.12291		GO:0007088	regulation of mitotic nuclear division	biological_process	0.0055587	0.10805
GO:0043021	ribonucleoprotein complex binding	molecular_function	0.0063351	0.12291		GO:0044711	single-organism biosynthetic process	biological_process	0.0056027	0.1088
GO:0070936	protein K48-linked ubiquitination	biological_process	0.0063413	0.12292		GO:0005740	mitochondrial envelope	cellular_component	0.0056851	0.1103
GO:0006520	cellular amino acid metabolic process	biological_process	0.0063482	0.12293		GO:0005765	lysosomal membrane	cellular_component	0.0056929	0.11035
GO:0003690	double-stranded DNA binding	molecular_function	0.0063659	0.12311		GO:0051427	hormone receptor binding	molecular_function	0.0057593	0.11153
GO:0009435	NAD biosynthetic process	biological_process	0.0063693	0.12311		GO:0009411	response to UV	biological_process	0.0057862	0.11195
GO:0008022	protein C-terminus binding	molecular_function	0.0063993	0.12356		GO:0006296	nucleotide-excision repair, DNA incision, 5'-to lesion	biological_process	0.0058483	0.11304
GO:0007155	cell adhesion	biological_process	0.0064045	0.12356		GO:0007051	spindle organization	biological_process	0.0059003	0.11367
GO:0008443	phosphofructokinase activity	molecular_function	0.0064388	0.12411		GO:0010562	positive regulation of phosphorus metabolic process	biological_process	0.0059014	0.11367
GO:0035247	peptidyl-arginine omega-N-methylation	biological_process	0.0064484	0.12418		GO:0045937	positive regulation of phosphate metabolic process	biological_process	0.0059014	0.11367
GO:0055088	lipid homeostasis	biological_process	0.0065186	0.12532		GO:0033116	endoplasmic reticulum-Golgi intermediate compartment membrane	cellular_component	0.0059026	0.11367
GO:0010632	regulation of epithelial cell migration	biological_process	0.0065198	0.12532		GO:0048145	regulation of fibroblast proliferation	biological_process	0.0059134	0.11375
GO:0006084	acetyl-CoA metabolic process	biological_process	0.0065392	0.12541		GO:1903361	protein localization to basolateral plasma membrane	biological_process	0.0059214	0.11375
GO:0045647	negative regulation of erythrocyte differentiation	biological_process	0.006541	0.12541		GO:0050810	regulation of steroid biosynthetic process	biological_process	0.0059236	0.11375
GO:0048701	embryonic cranial skeleton morphogenesis	biological_process	0.0065428	0.12541		GO:0006518	peptide metabolic process	biological_process	0.0059847	0.11482
GO:0070317	negative regulation of G0 to G1 transition	biological_process	0.0065685	0.12579		GO:0043523	regulation of neuron apoptotic process	biological_process	0.0060157	0.11526
GO:0016604	nuclear body	cellular_component	0.006585	0.12599		GO:0042448	progesterone metabolic process	biological_process	0.0060186	0.11526
GO:0030900	forebrain development	biological_process	0.0066022	0.1262		GO:0010458	exit from mitosis	biological_process	0.0060501	0.11573
GO:0000151	ubiquitin ligase complex	cellular_component	0.006654	0.12703		GO:0071001	U4/U6 snRNP	cellular_component	0.0060542	0.11573
GO:0032452	histone demethylase activity	molecular_function	0.006658	0.12703		GO:0044786	cell cycle DNA replication	biological_process	0.0060782	0.11592
GO:0034330	cell junction organization	biological_process	0.0066733	0.12711		GO:1902047	polyamine transmembrane transport	biological_process	0.0060811	0.11592
GO:0016818	hydrolase activity, acting on acid anhydrides, in phosphorus-containing anhydrides	molecular_function	0.0066844	0.12711		GO:1902267	regulation of polyamine transmembrane transport	biological_process	0.0060811	0.11592
GO:0000422	mitophagy	biological_process	0.0066865	0.12711		GO:0017015	regulation of transforming growth factor beta receptor signaling pathway	biological_process	0.0061083	0.11623
GO:0061726	mitochondrion disassembly	biological_process	0.0066865	0.12711		GO:1903844	regulation of cellular response to transforming growth factor beta stimulus	biological_process	0.0061083	0.11623
GO:0035794	positive regulation of mitochondrial membrane permeability	biological_process	0.0066965	0.12718		GO:0016095	polyprenol catabolic process	biological_process	0.0061491	0.11681
GO:0014066	regulation of phosphatidylinositol 3-kinase signaling	biological_process	0.0067219	0.12755		GO:0097435	fibril organization	biological_process	0.0061503	0.11681
GO:0061314	Notch signaling involved in heart development	biological_process	0.0067466	0.12779		GO:0031987	locomotion involved in locomotory behavior	biological_process	0.0061994	0.11763
GO:0038066	p38MAPK cascade	biological_process	0.0067471	0.12779		GO:0071398	cellular response to fatty acid	biological_process	0.006219	0.11785
GO:0006119	oxidative phosphorylation	biological_process	0.0068015	0.12871		GO:0010631	epithelial cell migration	biological_process	0.0062219	0.11785
GO:0044087	regulation of cellular component biogenesis	biological_process	0.0068182	0.12891		GO:0031261	DNA replication preinitiation complex	cellular_component	0.0062451	0.11818
GO:0060348	bone development	biological_process	0.0068727	0.12982		GO:0010243	response to organonitrogen compound	biological_process	0.0062522	0.11821
GO:0004656	procollagen-proline 4-dioxygenase activity	molecular_function	0.0069094	0.13039		GO:0010519	negative regulation of phospholipase activity	biological_process	0.0062613	0.11827
GO:0006595	polyamine metabolic process	biological_process	0.0069205	0.13048		GO:0032786	positive regulation of DNA-templated transcription, elongation	biological_process	0.0062708	0.11833
GO:0006412	translation	biological_process	0.0069316	0.13057		GO:0016788	hydrolase activity, acting on ester bonds	molecular_function	0.0062761	0.11833
GO:0097371	MDM2/MDM4 family protein binding	molecular_function	0.006961	0.13101		GO:0008156	negative regulation of DNA replication	biological_process	0.0062828	0.11835
GO:0008295	spermidine biosynthetic process	biological_process	0.0069722	0.1311		GO:0016246	RNA interference	biological_process	0.0062967	0.11851
GO:0031386	protein tag	molecular_function	0.0069787	0.1311		GO:0043206	extracellular fibril organization	biological_process	0.0063139	0.11872
GO:0048408	epidermal growth factor binding	molecular_function	0.0070061	0.13148		GO:0032963	collagen metabolic process	biological_process	0.0063213	0.11875
GO:0045807	positive regulation of endocytosis	biological_process	0.0070112	0.13148		GO:0031086	nuclear-transcribed mRNA catabolic process, deadenylation-independent decay	biological_process	0.0063461	0.11911
GO:0071010	prespliceosome	cellular_component	0.0070256	0.13163		GO:0047718	indanol dehydrogenase activity	molecular_function	0.0063625	0.11931
GO:0019852	L-ascorbic acid metabolic process	biological_process	0.0070664	0.13227		GO:0000978	RNA polymerase II core promoter proximal region sequence-specific DNA binding	molecular_function	0.0063921	0.1197
GO:0042762	regulation of sulfur metabolic process	biological_process	0.0070865	0.13235		GO:0017048	Rho GTPase binding	molecular_function	0.0063949	0.1197
GO:0072163	mesonephric epithelium development	biological_process	0.0070895	0.13235		GO:0090130	tissue migration	biological_process	0.0064091	0.11986
GO:0072164	mesonephric tubule development	biological_process	0.0070895	0.13235		GO:0031396	regulation of protein ubiquitination	biological_process	0.0064224	0.12
GO:0060740	prostate gland epithelium morphogenesis	biological_process	0.007103	0.13244		GO:0052548	regulation of endopeptidase activity	biological_process	0.0064325	0.12008
GO:0005753	mitochondrial proton-transporting ATP synthase complex	cellular_component	0.0071071	0.13244		GO:0006919	activation of cysteine-type endopeptidase activity involved in apoptotic process	biological_process	0.0064578	0.12045
GO:0071013	catalytic step 2 spliceosome	cellular_component	0.0071241	0.13263		GO:2000736	regulation of stem cell differentiation	biological_process	0.0064805	0.1207
GO:0045165	cell fate commitment	biological_process	0.0071309	0.13264		GO:0000217	DNA secondary structure binding	molecular_function	0.0064871	0.1207
GO:0010823	negative regulation of mitochondrion organization	biological_process	0.0071421	0.13264		GO:0038065	collagen-activated signaling pathway	biological_process	0.0064961	0.1207
GO:0030529	ribonucleoprotein complex	cellular_component	0.0071437	0.13264		GO:0097502	mannosylation	biological_process	0.0064966	0.1207
GO:0001673	male germ cell nucleus	cellular_component	0.0072171	0.13382		GO:0031519	PcG protein complex	cellular_component	0.0065006	0.1207
GO:0032404	mismatch repair complex binding	molecular_function	0.0072198	0.13382		GO:0030397	membrane disassembly	biological_process	0.0065168	0.12079
GO:0042177	negative regulation of protein catabolic process	biological_process	0.0072679	0.13459		GO:0051081	nuclear envelope disassembly	biological_process	0.0065168	0.12079
GO:0090312	positive regulation of protein deacetylation	biological_process	0.0073013	0.13508		GO:0043967	histone H4 acetylation	biological_process	0.0065237	0.1208
GO:0035242	protein-arginine omega-N asymmetric methyltransferase activity	molecular_function	0.00732	0.13531		GO:2000644	regulation of receptor catabolic process	biological_process	0.0065537	0.12125
GO:0008654	phospholipid biosynthetic process	biological_process	0.0073797	0.13629		GO:0044033	multi-organism metabolic process	biological_process	0.0066374	0.12269
GO:0006195	purine nucleotide catabolic process	biological_process	0.0074291	0.13708		GO:0007596	blood coagulation	biological_process	0.0066987	0.12371
GO:0008104	protein localization	biological_process	0.007452	0.1373		GO:0030621	U4 snRNA binding	molecular_function	0.0067045	0.12371
GO:0016239	positive regulation of macroautophagy	biological_process	0.0074542	0.1373		GO:0051962	positive regulation of nervous system development	biological_process	0.0067145	0.12378
GO:0051721	protein phosphatase 2A binding	molecular_function	0.007463	0.13734		GO:0090090	negative regulation of canonical Wnt signaling pathway	biological_process	0.006757	0.12446
GO:0019787	ubiquitin-like protein transferase activity	molecular_function	0.007526	0.13838		GO:0051043	regulation of membrane protein ectodomain proteolysis	biological_process	0.0068402	0.12588
GO:0006767	water-soluble vitamin metabolic process	biological_process	0.0075378	0.13847		GO:0031571	mitotic G1 DNA damage checkpoint	biological_process	0.0068759	0.12631
GO:1903121	regulation of TRAIL-activated apoptotic signaling pathway	biological_process	0.0075569	0.1387		GO:0044819	mitotic G1/S transition checkpoint	biological_process	0.0068759	0.12631
GO:0022610	biological adhesion	biological_process	0.0075901	0.13911		GO:0014909	smooth muscle cell migration	biological_process	0.0069047	0.12673
GO:0065003	macromolecular complex assembly	biological_process	0.0075924	0.13911		GO:0008047	enzyme activator activity	molecular_function	0.0069404	0.12727
GO:0007162	negative regulation of cell adhesion	biological_process	0.0076043	0.1392		GO:0043604	amide biosynthetic process	biological_process	0.0069651	0.12752
GO:1902580	single-organism cellular localization	biological_process	0.0076149	0.13926		GO:0048468	cell development	biological_process	0.0069683	0.12752
GO:0016817	hydrolase activity, acting on acid anhydrides	molecular_function	0.0076213	0.13926		GO:0033673	negative regulation of kinase activity	biological_process	0.0069779	0.12752
GO:0005536	glucose binding	molecular_function	0.0076581	0.13981		GO:0006334	nucleosome assembly	biological_process	0.0069846	0.12752
GO:0043200	response to amino acid	biological_process	0.0076797	0.14009		GO:0030855	epithelial cell differentiation	biological_process	0.0069846	0.12752
GO:0048738	cardiac muscle tissue development	biological_process	0.0077714	0.14163		GO:0000302	response to reactive oxygen species	biological_process	0.0070352	0.12833
GO:0017148	negative regulation of translation	biological_process	0.0077832	0.14172		GO:0007507	heart development	biological_process	0.0070648	0.12876
GO:0038203	TORC2 signaling	biological_process	0.0078456	0.14273		GO:0010717	regulation of epithelial to mesenchymal transition	biological_process	0.007071	0.12876
GO:0045664	regulation of neuron differentiation	biological_process	0.007905	0.14369		GO:0097009	energy homeostasis	biological_process	0.0070835	0.12887
GO:0031401	positive regulation of protein modification process	biological_process	0.0079423	0.14424		GO:1901654	response to ketone	biological_process	0.0070946	0.12896
GO:0061351	neural precursor cell proliferation	biological_process	0.0079495	0.14425		GO:0071013	catalytic step 2 spliceosome	cellular_component	0.007137	0.12962
GO:2000371	regulation of DNA topoisomerase (ATP-hydrolyzing) activity	biological_process	0.0079668	0.14431		GO:0048365	Rac GTPase binding	molecular_function	0.0071884	0.13035
GO:2000373	positive regulation of DNA topoisomerase (ATP-hydrolyzing) activity	biological_process	0.0079668	0.14431		GO:0060562	epithelial tube morphogenesis	biological_process	0.00719	0.13035
GO:0051123	RNA polymerase II transcriptional preinitiation complex assembly	biological_process	0.00801	0.14496		GO:0045541	negative regulation of cholesterol biosynthetic process	biological_process	0.007212	0.13052
GO:0000307	cyclin-dependent protein kinase holoenzyme complex	cellular_component	0.0080433	0.14533		GO:0090206	negative regulation of cholesterol metabolic process	biological_process	0.007212	0.13052
GO:0035329	hippo signaling	biological_process	0.0080484	0.14533		GO:0043434	response to peptide hormone	biological_process	0.0072648	0.13136
GO:0072073	kidney epithelium development	biological_process	0.0080515	0.14533		GO:1901030	positive regulation of mitochondrial outer membrane permeabilization involved in apoptotic signaling pathway	biological_process	0.0072728	0.13139
GO:0001935	endothelial cell proliferation	biological_process	0.0080788	0.1457		GO:0072657	protein localization to membrane	biological_process	0.0073802	0.13322
GO:0044283	small molecule biosynthetic process	biological_process	0.0080971	0.1459		GO:0048812	neuron projection morphogenesis	biological_process	0.0073893	0.13327
GO:0016446	somatic hypermutation of immunoglobulin genes	biological_process	0.0081217	0.14622		GO:0031994	insulin-like growth factor I binding	molecular_function	0.0073969	0.13329
GO:0000099	sulfur amino acid transmembrane transporter activity	molecular_function	0.0081398	0.14625		GO:1900363	regulation of mRNA polyadenylation	biological_process	0.0074509	0.13409
GO:0046822	regulation of nucleocytoplasmic transport	biological_process	0.0081416	0.14625		GO:0018636	phenanthrene 9,10-monooxygenase activity	molecular_function	0.0074608	0.13409
GO:0042118	endothelial cell activation	biological_process	0.0081449	0.14625		GO:0047086	ketosteroid monooxygenase activity	molecular_function	0.0074608	0.13409
GO:0051276	chromosome organization	biological_process	0.0081694	0.14633		GO:0005874	microtubule	cellular_component	0.0075188	0.13501
GO:0090342	regulation of cell aging	biological_process	0.0081801	0.14633		GO:0001159	core promoter proximal region DNA binding	molecular_function	0.0075782	0.13592
GO:0034097	response to cytokine	biological_process	0.0081815	0.14633		GO:0060441	epithelial tube branching involved in lung morphogenesis	biological_process	0.0075825	0.13592
GO:0033169	histone H3-K9 demethylation	biological_process	0.0081854	0.14633		GO:0051315	attachment of mitotic spindle microtubules to kinetochore	biological_process	0.0076085	0.13627
GO:0030326	embryonic limb morphogenesis	biological_process	0.0081914	0.14633		GO:0019083	viral transcription	biological_process	0.0076293	0.1365
GO:0035113	embryonic appendage morphogenesis	biological_process	0.0081914	0.14633		GO:0071496	cellular response to external stimulus	biological_process	0.0076385	0.1365
GO:0043408	regulation of MAPK cascade	biological_process	0.0082305	0.14685		GO:0044259	multicellular organismal macromolecule metabolic process	biological_process	0.0076412	0.1365
GO:0007184	SMAD protein import into nucleus	biological_process	0.0082354	0.14685		GO:0044452	nucleolar part	cellular_component	0.0076673	0.13685
GO:0004074	biliverdin reductase activity	molecular_function	0.0082418	0.14685		GO:0010891	negative regulation of sequestering of triglyceride	biological_process	0.0076989	0.13718
GO:0030291	protein serine/threonine kinase inhibitor activity	molecular_function	0.0083133	0.1479		GO:0010801	negative regulation of peptidyl-threonine phosphorylation	biological_process	0.0076989	0.13718
GO:0045598	regulation of fat cell differentiation	biological_process	0.0083151	0.1479		GO:0000811	GINS complex	cellular_component	0.0077141	0.13733
GO:0010041	response to iron(III) ion	biological_process	0.0083336	0.1481		GO:0051305	chromosome movement towards spindle pole	biological_process	0.0077246	0.1374
GO:0008611	ether lipid biosynthetic process	biological_process	0.0084126	0.149		GO:0033186	CAF-1 complex	cellular_component	0.0077622	0.13795
GO:0046504	glycerol ether biosynthetic process	biological_process	0.0084126	0.149		GO:0010939	regulation of necrotic cell death	biological_process	0.0078006	0.13851
GO:0097384	cellular lipid biosynthetic process	biological_process	0.0084126	0.149		GO:0044390	ubiquitin-like protein conjugating enzyme binding	molecular_function	0.0078121	0.1386
GO:1901503	ether biosynthetic process	biological_process	0.0084126	0.149		GO:0043086	negative regulation of catalytic activity	biological_process	0.0078481	0.13901
GO:0042455	ribonucleoside biosynthetic process	biological_process	0.0084412	0.14936		GO:0031966	mitochondrial membrane	cellular_component	0.0078487	0.13901
GO:0048872	homeostasis of number of cells	biological_process	0.0084473	0.14936		GO:2000001	regulation of DNA damage checkpoint	biological_process	0.0078601	0.13908
GO:0014745	negative regulation of muscle adaptation	biological_process	0.008512	0.15037		GO:0007369	gastrulation	biological_process	0.0078661	0.13908
GO:0051346	negative regulation of hydrolase activity	biological_process	0.0085194	0.15038		GO:0000932	cytoplasmic mRNA processing body	cellular_component	0.0079076	0.1397
GO:0019838	growth factor binding	molecular_function	0.0085289	0.15042		GO:0001704	formation of primary germ layer	biological_process	0.0079264	0.13991
GO:1902956	regulation of mitochondrial electron transport, NADH to ubiquinone	biological_process	0.0085621	0.15087		GO:0005290	L-histidine transmembrane transporter activity	molecular_function	0.0079699	0.14032
GO:1903670	regulation of sprouting angiogenesis	biological_process	0.0085865	0.15118		GO:0006867	asparagine transport	biological_process	0.0079699	0.14032
GO:0051345	positive regulation of hydrolase activity	biological_process	0.008621	0.15165		GO:0015182	L-asparagine transmembrane transporter activity	molecular_function	0.0079699	0.14032
GO:0071371	cellular response to gonadotropin stimulus	biological_process	0.0086563	0.15197		GO:0045618	positive regulation of keratinocyte differentiation	biological_process	0.0080036	0.14079
GO:0004820	glycine-tRNA ligase activity	molecular_function	0.0086676	0.15197		GO:0009446	putrescine biosynthetic process	biological_process	0.0080116	0.14081
GO:0006426	glycyl-tRNA aminoacylation	biological_process	0.0086676	0.15197		GO:0016093	polyprenol metabolic process	biological_process	0.0080282	0.14099
GO:0015631	tubulin binding	molecular_function	0.0086682	0.15197		GO:0051176	positive regulation of sulfur metabolic process	biological_process	0.0080424	0.14112
GO:0010771	negative regulation of cell morphogenesis involved in differentiation	biological_process	0.0086926	0.15227		GO:0000987	core promoter proximal region sequence-specific DNA binding	molecular_function	0.0081009	0.142
GO:0061030	epithelial cell differentiation involved in mammary gland alveolus development	biological_process	0.008713	0.1525		GO:0090132	epithelium migration	biological_process	0.0081067	0.142
GO:0030145	manganese ion binding	molecular_function	0.0087288	0.15264		GO:0004527	exonuclease activity	molecular_function	0.0081166	0.14206
GO:0042440	pigment metabolic process	biological_process	0.0087877	0.1534		GO:0010038	response to metal ion	biological_process	0.0081252	0.14209
GO:0008203	cholesterol metabolic process	biological_process	0.008789	0.1534		GO:0007165	signal transduction	biological_process	0.008132	0.14209
GO:0007224	smoothened signaling pathway	biological_process	0.0087943	0.1534		GO:0044272	sulfur compound biosynthetic process	biological_process	0.0081615	0.14248
GO:0005167	neurotrophin TRK receptor binding	molecular_function	0.0088137	0.15361		GO:0061384	heart trabecula morphogenesis	biological_process	0.00819	0.14268
GO:0006298	mismatch repair	biological_process	0.0088459	0.15404		GO:0050817	coagulation	biological_process	0.0081926	0.14268
GO:0004842	ubiquitin-protein transferase activity	molecular_function	0.0088848	0.15459		GO:1901028	regulation of mitochondrial outer membrane permeabilization involved in apoptotic signaling pathway	biological_process	0.0081937	0.14268
GO:0045628	regulation of T-helper 2 cell differentiation	biological_process	0.0089102	0.1549		GO:0070266	necroptotic process	biological_process	0.0082235	0.14308
GO:0017025	TBP-class protein binding	molecular_function	0.0089769	0.15593		GO:0005518	collagen binding	molecular_function	0.0082719	0.1438
GO:0031519	PcG protein complex	cellular_component	0.0089875	0.15598		GO:0022617	extracellular matrix disassembly	biological_process	0.008302	0.14404
GO:0002467	germinal center formation	biological_process	0.0090637	0.15718		GO:0005774	vacuolar membrane	cellular_component	0.0083039	0.14404
GO:0010506	regulation of autophagy	biological_process	0.0091056	0.15777		GO:0008853	exodeoxyribonuclease III activity	molecular_function	0.0083063	0.14404
GO:0051302	regulation of cell division	biological_process	0.0091509	0.15842		GO:0035239	tube morphogenesis	biological_process	0.008319	0.14414
GO:0048640	negative regulation of developmental growth	biological_process	0.0092146	0.15935		GO:0001948	glycoprotein binding	molecular_function	0.0083292	0.1442
GO:0016125	sterol metabolic process	biological_process	0.0092198	0.15935		GO:0019079	viral genome replication	biological_process	0.0083472	0.14439
GO:0048704	embryonic skeletal system morphogenesis	biological_process	0.0092464	0.15968		GO:0002576	platelet degranulation	biological_process	0.0083763	0.14477
GO:0032387	negative regulation of intracellular transport	biological_process	0.0092722	0.15999		GO:1902683	regulation of receptor localization to synapse	biological_process	0.0084063	0.14517
GO:0019200	carbohydrate kinase activity	molecular_function	0.0092867	0.16011		GO:0097305	response to alcohol	biological_process	0.0084805	0.14628
GO:0060282	positive regulation of oocyte development	biological_process	0.0093765	0.16136		GO:0044783	G1 DNA damage checkpoint	biological_process	0.0084849	0.14628
GO:0019208	phosphatase regulator activity	molecular_function	0.009381	0.16136		GO:0044839	cell cycle G2/M phase transition	biological_process	0.0085146	0.14667
GO:0021884	forebrain neuron development	biological_process	0.0093826	0.16136		GO:0003689	DNA clamp loader activity	molecular_function	0.0085457	0.14692
GO:0060039	pericardium development	biological_process	0.0093911	0.16137		GO:0033170	protein-DNA loading ATPase activity	molecular_function	0.0085457	0.14692
GO:0009649	entrainment of circadian clock	biological_process	0.0094113	0.16154		GO:0034713	type I transforming growth factor beta receptor binding	molecular_function	0.0085502	0.14692
GO:0032405	MutLalpha complex binding	molecular_function	0.0094168	0.16154		GO:0090329	regulation of DNA-dependent DNA replication	biological_process	0.008648	0.14848
GO:0010314	phosphatidylinositol-5-phosphate binding	molecular_function	0.0094248	0.16155		GO:0043393	regulation of protein binding	biological_process	0.008661	0.14858
GO:0006461	protein complex assembly	biological_process	0.0094573	0.16184		GO:0005896	interleukin-6 receptor complex	cellular_component	0.008695	0.14904
GO:0070271	protein complex biogenesis	biological_process	0.0094573	0.16184		GO:0007005	mitochondrion organization	biological_process	0.0087516	0.14988
GO:0031595	nuclear proteasome complex	cellular_component	0.0094866	0.1622		GO:0007599	hemostasis	biological_process	0.0087785	0.15022
GO:0048589	developmental growth	biological_process	0.0095038	0.16236		GO:0034330	cell junction organization	biological_process	0.0087965	0.1504
GO:0003779	actin binding	molecular_function	0.0095259	0.16261		GO:0033387	putrescine biosynthetic process from ornithine	biological_process	0.0088241	0.15066
GO:0010042	response to manganese ion	biological_process	0.009534	0.16261		GO:0001885	endothelial cell development	biological_process	0.008826	0.15066
GO:0034333	adherens junction assembly	biological_process	0.0095469	0.1627		GO:0045927	positive regulation of growth	biological_process	0.0088401	0.15078
GO:0030218	erythrocyte differentiation	biological_process	0.0095653	0.16288		GO:0045741	positive regulation of epidermal growth factor-activated receptor activity	biological_process	0.008857	0.15094
GO:0001922	B-1 B cell homeostasis	biological_process	0.0095934	0.16322		GO:0001570	vasculogenesis	biological_process	0.0088735	0.1511
GO:0043621	protein self-association	molecular_function	0.009611	0.16339		GO:0071901	negative regulation of protein serine/threonine kinase activity	biological_process	0.0088841	0.15115
GO:0005525	GTP binding	molecular_function	0.0096339	0.16351		GO:0050768	negative regulation of neurogenesis	biological_process	0.008929	0.15179
GO:0005903	brush border	cellular_component	0.009634	0.16351		GO:0034138	toll-like receptor 3 signaling pathway	biological_process	0.0089487	0.15196
GO:0031063	regulation of histone deacetylation	biological_process	0.0096697	0.16398		GO:0007097	nuclear migration	biological_process	0.0089534	0.15196
GO:0070372	regulation of ERK1 and ERK2 cascade	biological_process	0.009693	0.16424		GO:0071214	cellular response to abiotic stimulus	biological_process	0.008997	0.15242
GO:0098772	molecular function regulator	molecular_function	0.0097271	0.16469		GO:0032970	regulation of actin filament-based process	biological_process	0.0090309	0.15242
GO:0032561	guanyl ribonucleotide binding	molecular_function	0.0097547	0.16502		GO:0060057	apoptotic process involved in mammary gland involution	biological_process	0.0090321	0.15242
GO:0045259	proton-transporting ATP synthase complex	cellular_component	0.0097739	0.16521		GO:0060058	positive regulation of apoptotic process involved in mammary gland involution	biological_process	0.0090321	0.15242
GO:0061428	negative regulation of transcription from RNA polymerase II promoter in response to hypoxia	biological_process	0.0097826	0.16522		GO:1902339	positive regulation of apoptotic process involved in morphogenesis	biological_process	0.0090321	0.15242
GO:0000245	spliceosomal complex assembly	biological_process	0.009801	0.1654		GO:1903519	regulation of mammary gland involution	biological_process	0.0090321	0.15242
GO:0016577	histone demethylation	biological_process	0.0098194	0.16557		GO:1903521	positive regulation of mammary gland involution	biological_process	0.0090321	0.15242
GO:0032365	intracellular lipid transport	biological_process	0.0098435	0.16567		GO:0044450	microtubule organizing center part	cellular_component	0.009074	0.153
GO:0045917	positive regulation of complement activation	biological_process	0.0098493	0.16567		GO:0006740	NADPH regeneration	biological_process	0.0091336	0.15388
GO:2000259	positive regulation of protein activation cascade	biological_process	0.0098493	0.16567		GO:0016575	histone deacetylation	biological_process	0.0091442	0.15394
GO:0051403	stress-activated MAPK cascade	biological_process	0.0099349	0.16687		GO:0060600	dichotomous subdivision of an epithelial terminal unit	biological_process	0.0091679	0.15421
GO:0048634	regulation of muscle organ development	biological_process	0.0099365	0.16687		GO:0046540	U4/U6 x U5 tri-snRNP complex	cellular_component	0.009197	0.15458
GO:0044802	single-organism membrane organization	biological_process	0.010066	0.16891		GO:0034399	nuclear periphery	cellular_component	0.0092227	0.15488
GO:0043122	regulation of I-kappaB kinase/NF-kappaB signaling	biological_process	0.010102	0.16937		GO:0000307	cyclin-dependent protein kinase holoenzyme complex	cellular_component	0.009245	0.15505
GO:0032461	positive regulation of protein oligomerization	biological_process	0.010143	0.1699		GO:0060051	negative regulation of protein glycosylation	biological_process	0.0092478	0.15505
GO:0005794	Golgi apparatus	cellular_component	0.01015	0.1699		GO:0036120	cellular response to platelet-derived growth factor stimulus	biological_process	0.0092574	0.15509
GO:0060438	trachea development	biological_process	0.010168	0.17007		GO:0016485	protein processing	biological_process	0.009358	0.15656
GO:0005768	endosome	cellular_component	0.010188	0.17022		GO:0005801	cis-Golgi network	cellular_component	0.0093605	0.15656
GO:0043201	response to leucine	biological_process	0.010203	0.17022		GO:0048598	embryonic morphogenesis	biological_process	0.0093977	0.15696
GO:0060964	regulation of gene silencing by miRNA	biological_process	0.010208	0.17022		GO:0030291	protein serine/threonine kinase inhibitor activity	molecular_function	0.0093997	0.15696
GO:1903308	regulation of chromatin modification	biological_process	0.01021	0.17022		GO:1901652	response to peptide	biological_process	0.0094508	0.1575
GO:0051020	GTPase binding	molecular_function	0.01025	0.17068		GO:0005483	soluble NSF attachment protein activity	molecular_function	0.0094597	0.1575
GO:0001934	positive regulation of protein phosphorylation	biological_process	0.010254	0.17068		GO:0005604	basement membrane	cellular_component	0.0094629	0.1575
GO:0007266	Rho protein signal transduction	biological_process	0.01031	0.17131		GO:0098642	network-forming collagen trimer	cellular_component	0.009472	0.1575
GO:0032436	positive regulation of proteasomal ubiquitin-dependent protein catabolic process	biological_process	0.010311	0.17131		GO:0098645	collagen network	cellular_component	0.009472	0.1575
GO:0072523	purine-containing compound catabolic process	biological_process	0.010316	0.17131		GO:0044092	negative regulation of molecular function	biological_process	0.0094776	0.1575
GO:2000276	negative regulation of oxidative phosphorylation uncoupler activity	biological_process	0.010341	0.17157		GO:0036302	atrioventricular canal development	biological_process	0.009509	0.1579
GO:1990204	oxidoreductase complex	cellular_component	0.010396	0.17205		GO:0030324	lung development	biological_process	0.0095203	0.15796
GO:0017059	serine C-palmitoyltransferase complex	cellular_component	0.010396	0.17205		GO:0014031	mesenchymal cell development	biological_process	0.0095619	0.15852
GO:0031211	endoplasmic reticulum palmitoyltransferase complex	cellular_component	0.010396	0.17205		GO:0006085	acetyl-CoA biosynthetic process	biological_process	0.0096635	0.16008
GO:0019001	guanyl nucleotide binding	molecular_function	0.010403	0.17205		GO:0007565	female pregnancy	biological_process	0.0096802	0.16023
GO:0060982	coronary artery morphogenesis	biological_process	0.010525	0.17393		GO:2000774	positive regulation of cellular senescence	biological_process	0.0097657	0.16119
GO:0008429	phosphatidylethanolamine binding	molecular_function	0.010534	0.17395		GO:0044319	wound healing, spreading of cells	biological_process	0.0097718	0.16119
GO:0042474	middle ear morphogenesis	biological_process	0.010568	0.17425		GO:0090505	epiboly involved in wound healing	biological_process	0.0097718	0.16119
GO:0021879	forebrain neuron differentiation	biological_process	0.010569	0.17425		GO:0001974	blood vessel remodeling	biological_process	0.0097749	0.16119
GO:0090311	regulation of protein deacetylation	biological_process	0.010583	0.17434		GO:1900739	regulation of protein insertion into mitochondrial membrane involved in apoptotic signaling pathway	biological_process	0.0097851	0.16119
GO:0004703	G-protein coupled receptor kinase activity	molecular_function	0.010652	0.17533		GO:1900740	positive regulation of protein insertion into mitochondrial membrane involved in apoptotic signaling pathway	biological_process	0.0097851	0.16119
GO:1903008	organelle disassembly	biological_process	0.01068	0.17565		GO:1900180	regulation of protein localization to nucleus	biological_process	0.0098062	0.16141
GO:0000904	cell morphogenesis involved in differentiation	biological_process	0.010694	0.17575		GO:0043401	steroid hormone mediated signaling pathway	biological_process	0.0098293	0.16155
GO:0031410	cytoplasmic vesicle	cellular_component	0.01072	0.17604		GO:0004672	protein kinase activity	molecular_function	0.0098301	0.16155
GO:0003712	transcription cofactor activity	molecular_function	0.010731	0.17608		GO:0033152	immunoglobulin V(D)J recombination	biological_process	0.0098437	0.16165
GO:0043525	positive regulation of neuron apoptotic process	biological_process	0.01083	0.17756		GO:0051384	response to glucocorticoid	biological_process	0.009879	0.1621
GO:0090261	positive regulation of inclusion body assembly	biological_process	0.01084	0.17758		GO:0001682	tRNA 5'-leader removal	biological_process	0.0098962	0.16216
GO:0021954	central nervous system neuron development	biological_process	0.010907	0.17854		GO:0006977	DNA damage response, signal transduction by p53 class mediator resulting in cell cycle arrest	biological_process	0.0099027	0.16216
GO:0090084	negative regulation of inclusion body assembly	biological_process	0.010923	0.17865		GO:1990267	response to transition metal nanoparticle	biological_process	0.0099064	0.16216
GO:0042149	cellular response to glucose starvation	biological_process	0.010943	0.17884		GO:0030057	desmosome	cellular_component	0.0099915	0.16343
GO:1903313	positive regulation of mRNA metabolic process	biological_process	0.010989	0.17926		GO:2001244	positive regulation of intrinsic apoptotic signaling pathway	biological_process	0.010126	0.16549
GO:0008593	regulation of Notch signaling pathway	biological_process	0.010999	0.17926		GO:0061097	regulation of protein tyrosine kinase activity	biological_process	0.010148	0.16573
GO:1903320	regulation of protein modification by small protein conjugation or removal	biological_process	0.011002	0.17926		GO:0003221	right ventricular cardiac muscle tissue morphogenesis	biological_process	0.010202	0.16647
GO:0035024	negative regulation of Rho protein signal transduction	biological_process	0.011003	0.17926		GO:0042987	amyloid precursor protein catabolic process	biological_process	0.010255	0.16715
GO:0010574	regulation of vascular endothelial growth factor production	biological_process	0.011106	0.1808		GO:0008200	ion channel inhibitor activity	molecular_function	0.010274	0.16715
GO:0006720	isoprenoid metabolic process	biological_process	0.011131	0.18106		GO:0090002	establishment of protein localization to plasma membrane	biological_process	0.010276	0.16715
GO:0021680	cerebellar Purkinje cell layer development	biological_process	0.011153	0.18118		GO:0016893	endonuclease activity, active with either ribo- or deoxyribonucleic acids and producing 5'-phosphomonoesters	molecular_function	0.010276	0.16715
GO:0001823	mesonephros development	biological_process	0.011155	0.18118		GO:0072710	response to hydroxyurea	biological_process	0.010319	0.16759
GO:0042994	cytoplasmic sequestering of transcription factor	biological_process	0.011173	0.18132		GO:0072711	cellular response to hydroxyurea	biological_process	0.010319	0.16759
GO:1902275	regulation of chromatin organization	biological_process	0.011216	0.18188		GO:0071664	catenin-TCF7L2 complex	cellular_component	0.010351	0.16778
GO:0009952	anterior/posterior pattern specification	biological_process	0.011252	0.18232		GO:0043596	nuclear replication fork	cellular_component	0.010354	0.16778
GO:0032434	regulation of proteasomal ubiquitin-dependent protein catabolic process	biological_process	0.011274	0.18253		GO:0016668	oxidoreductase activity, acting on a sulfur group of donors, NAD(P) as acceptor	molecular_function	0.010355	0.16778
GO:0007569	cell aging	biological_process	0.011283	0.18254		GO:0048863	stem cell differentiation	biological_process	0.010371	0.16791
GO:0005543	phospholipid binding	molecular_function	0.0113	0.18267		GO:0006892	post-Golgi vesicle-mediated transport	biological_process	0.010388	0.168
GO:0016568	chromatin modification	biological_process	0.011318	0.18282		GO:0045182	translation regulator activity	molecular_function	0.010393	0.168
GO:0032844	regulation of homeostatic process	biological_process	0.011362	0.18338		GO:0006220	pyrimidine nucleotide metabolic process	biological_process	0.010421	0.16832
GO:0044255	cellular lipid metabolic process	biological_process	0.011383	0.18358		GO:0060666	dichotomous subdivision of terminal units involved in salivary gland branching	biological_process	0.010441	0.16852
GO:0090259	regulation of retinal ganglion cell axon guidance	biological_process	0.011415	0.18395		GO:0072542	protein phosphatase activator activity	molecular_function	0.010507	0.16945
GO:0010718	positive regulation of epithelial to mesenchymal transition	biological_process	0.011459	0.18451		GO:0070482	response to oxygen levels	biological_process	0.010517	0.16948
GO:0004879	RNA polymerase II transcription factor activity, ligand-activated sequence-specific DNA binding	molecular_function	0.011486	0.18461		GO:0045682	regulation of epidermis development	biological_process	0.010553	0.16993
GO:0098531	transcription factor activity, direct ligand regulated sequence-specific DNA binding	molecular_function	0.011486	0.18461		GO:0031952	regulation of protein autophosphorylation	biological_process	0.010602	0.17039
GO:0001678	cellular glucose homeostasis	biological_process	0.011492	0.18461		GO:0008026	ATP-dependent helicase activity	molecular_function	0.010606	0.17039
GO:0031267	small GTPase binding	molecular_function	0.011553	0.18546		GO:0070035	purine NTP-dependent helicase activity	molecular_function	0.010606	0.17039
GO:0070851	growth factor receptor binding	molecular_function	0.011692	0.18754		GO:0072401	signal transduction involved in DNA integrity checkpoint	biological_process	0.010636	0.1706
GO:0072594	establishment of protein localization to organelle	biological_process	0.011717	0.1878		GO:0072422	signal transduction involved in DNA damage checkpoint	biological_process	0.010636	0.1706
GO:0061695	transferase complex, transferring phosphorus-containing groups	cellular_component	0.011728	0.18782		GO:0032993	protein-DNA complex	cellular_component	0.010649	0.17068
GO:0008469	histone-arginine N-methyltransferase activity	molecular_function	0.011746	0.18785		GO:2000352	negative regulation of endothelial cell apoptotic process	biological_process	0.010663	0.17078
GO:0070316	regulation of G0 to G1 transition	biological_process	0.011747	0.18785		GO:1903362	regulation of cellular protein catabolic process	biological_process	0.010714	0.17146
GO:0019471	4-hydroxyproline metabolic process	biological_process	0.01186	0.18947		GO:0009279	cell outer membrane	cellular_component	0.010758	0.1718
GO:0007423	sensory organ development	biological_process	0.011869	0.18947		GO:0044462	external encapsulating structure part	cellular_component	0.010758	0.1718
GO:0043507	positive regulation of JUN kinase activity	biological_process	0.011881	0.18947		GO:0033683	nucleotide-excision repair, DNA incision	biological_process	0.010761	0.1718
GO:0043209	myelin sheath	cellular_component	0.011885	0.18947		GO:0043543	protein acylation	biological_process	0.010806	0.17238
GO:0015450	P-P-bond-hydrolysis-driven protein transmembrane transporter activity	molecular_function	0.011942	0.19023		GO:0060800	regulation of cell differentiation involved in embryonic placenta development	biological_process	0.010813	0.17238
GO:0014065	phosphatidylinositol 3-kinase signaling	biological_process	0.011998	0.19069		GO:0007154	cell communication	biological_process	0.0109	0.17362
GO:0042775	mitochondrial ATP synthesis coupled electron transport	biological_process	0.011999	0.19069		GO:0005173	stem cell factor receptor binding	molecular_function	0.010958	0.17431
GO:0008140	cAMP response element binding protein binding	molecular_function	0.012002	0.19069		GO:2000646	positive regulation of receptor catabolic process	biological_process	0.010959	0.17431
GO:0070375	ERK5 cascade	biological_process	0.012008	0.19069		GO:0060547	negative regulation of necrotic cell death	biological_process	0.011003	0.17487
GO:0042787	protein ubiquitination involved in ubiquitin-dependent protein catabolic process	biological_process	0.012067	0.19149		GO:0005010	insulin-like growth factor-activated receptor activity	molecular_function	0.011045	0.17512
GO:0034101	erythrocyte homeostasis	biological_process	0.012199	0.19343		GO:0001013	RNA polymerase I regulatory region DNA binding	molecular_function	0.011067	0.17512
GO:0071822	protein complex subunit organization	biological_process	0.012214	0.19352		GO:0001163	RNA polymerase I regulatory region sequence-specific DNA binding	molecular_function	0.011067	0.17512
GO:0046148	pigment biosynthetic process	biological_process	0.012234	0.19368		GO:0001164	RNA polymerase I CORE element sequence-specific DNA binding	molecular_function	0.011067	0.17512
GO:0060038	cardiac muscle cell proliferation	biological_process	0.012262	0.19398		GO:0006084	acetyl-CoA metabolic process	biological_process	0.011068	0.17512
GO:0032367	intracellular cholesterol transport	biological_process	0.012296	0.19436		GO:0003256	regulation of transcription from RNA polymerase II promoter involved in myocardial precursor cell differentiation	biological_process	0.011079	0.17512
GO:0048146	positive regulation of fibroblast proliferation	biological_process	0.012305	0.19436		GO:0097458	neuron part	cellular_component	0.011081	0.17512
GO:0042555	MCM complex	cellular_component	0.012332	0.19464		GO:0048608	reproductive structure development	biological_process	0.011086	0.17512
GO:0038084	vascular endothelial growth factor signaling pathway	biological_process	0.012382	0.19522		GO:0016667	oxidoreductase activity, acting on a sulfur group of donors	molecular_function	0.011127	0.17559
GO:0050922	negative regulation of chemotaxis	biological_process	0.012387	0.19522		GO:0032388	positive regulation of intracellular transport	biological_process	0.011133	0.17559
GO:0071417	cellular response to organonitrogen compound	biological_process	0.01242	0.19548		GO:0030864	cortical actin cytoskeleton	cellular_component	0.011173	0.17609
GO:0052739	phosphatidylserine 1-acylhydrolase activity	molecular_function	0.012433	0.19548		GO:0061458	reproductive system development	biological_process	0.011189	0.17621
GO:0052740	1-acyl-2-lysophosphatidylserine acylhydrolase activity	molecular_function	0.012433	0.19548		GO:0097062	dendritic spine maintenance	biological_process	0.011258	0.17715
GO:0002088	lens development in camera-type eye	biological_process	0.012442	0.19548		GO:0050772	positive regulation of axonogenesis	biological_process	0.011277	0.17725
GO:0001657	ureteric bud development	biological_process	0.012484	0.19601		GO:0016197	endosomal transport	biological_process	0.011281	0.17725
GO:0035091	phosphatidylinositol binding	molecular_function	0.012539	0.19671		GO:0098781	ncRNA transcription	biological_process	0.011299	0.17739
GO:0090037	positive regulation of protein kinase C signaling	biological_process	0.01255	0.19674		GO:0004741	[pyruvate dehydrogenase (lipoamide)] phosphatase activity	molecular_function	0.011332	0.17778
GO:0042921	glucocorticoid receptor signaling pathway	biological_process	0.012573	0.19691		GO:0070120	ciliary neurotrophic factor-mediated signaling pathway	biological_process	0.011386	0.1785
GO:0004812	aminoacyl-tRNA ligase activity	molecular_function	0.01258	0.19691		GO:0006364	rRNA processing	biological_process	0.011466	0.17954
GO:0007265	Ras protein signal transduction	biological_process	0.012747	0.19909		GO:0044530	supraspliceosomal complex	cellular_component	0.01147	0.17954
GO:0005687	U4 snRNP	cellular_component	0.012753	0.19909		GO:0061136	regulation of proteasomal protein catabolic process	biological_process	0.01148	0.17957
GO:0002116	semaphorin receptor complex	cellular_component	0.012757	0.19909		GO:0006473	protein acetylation	biological_process	0.011526	0.18014
GO:0017154	semaphorin receptor activity	molecular_function	0.012757	0.19909		GO:0034446	substrate adhesion-dependent cell spreading	biological_process	0.01155	0.18025
GO:0030947	regulation of vascular endothelial growth factor receptor signaling pathway	biological_process	0.01283	0.19995		GO:0005589	collagen type VI trimer	cellular_component	0.011566	0.18025
GO:0033120	positive regulation of RNA splicing	biological_process	0.012832	0.19995		GO:0098647	collagen beaded filament	cellular_component	0.011566	0.18025
GO:0002566	somatic diversification of immune receptors via somatic mutation	biological_process	0.012945	0.20141		GO:1903044	protein localization to membrane raft	biological_process	0.011568	0.18025
GO:0008270	zinc ion binding	molecular_function	0.012945	0.20141		GO:0097050	type B pancreatic cell apoptotic process	biological_process	0.011581	0.18032
GO:0005819	spindle	cellular_component	0.01297	0.20164		GO:0051784	negative regulation of nuclear division	biological_process	0.011655	0.18134
GO:1900451	positive regulation of glutamate receptor signaling pathway	biological_process	0.012998	0.20178		GO:0010639	negative regulation of organelle organization	biological_process	0.011669	0.18134
GO:2000969	positive regulation of alpha-amino-3-hydroxy-5-methyl-4-isoxazole propionate selective glutamate receptor activity	biological_process	0.012998	0.20178		GO:0009163	nucleoside biosynthetic process	biological_process	0.011672	0.18134
GO:0042393	histone binding	molecular_function	0.01301	0.20182		GO:0008140	cAMP response element binding protein binding	molecular_function	0.011728	0.18207
GO:0033014	tetrapyrrole biosynthetic process	biological_process	0.013036	0.2019		GO:1990825	sequence-specific mRNA binding	molecular_function	0.011791	0.18273
GO:0044294	dendritic growth cone	cellular_component	0.013037	0.2019		GO:1900623	regulation of monocyte aggregation	biological_process	0.011797	0.18273
GO:0031098	stress-activated protein kinase signaling cascade	biological_process	0.013044	0.2019		GO:1900625	positive regulation of monocyte aggregation	biological_process	0.011797	0.18273
GO:0010906	regulation of glucose metabolic process	biological_process	0.013061	0.20201		GO:0016010	dystrophin-associated glycoprotein complex	cellular_component	0.011818	0.18292
GO:0060325	face morphogenesis	biological_process	0.013102	0.20242		GO:0070602	regulation of centromeric sister chromatid cohesion	biological_process	0.011857	0.18339
GO:0034698	response to gonadotropin	biological_process	0.013108	0.20242		GO:1904037	positive regulation of epithelial cell apoptotic process	biological_process	0.011869	0.18343
GO:0042773	ATP synthesis coupled electron transport	biological_process	0.013146	0.20287		GO:0016607	nuclear speck	cellular_component	0.01189	0.18362
GO:0055076	transition metal ion homeostasis	biological_process	0.013227	0.20397		GO:0014910	regulation of smooth muscle cell migration	biological_process	0.011948	0.18438
GO:0031657	regulation of cyclin-dependent protein serine/threonine kinase activity involved in G1/S transition of mitotic cell cycle	biological_process	0.013309	0.205		GO:0021675	nerve development	biological_process	0.011962	0.18446
GO:0036449	microtubule minus-end	cellular_component	0.013314	0.205		GO:0005802	trans-Golgi network	cellular_component	0.011989	0.18474
GO:0000228	nuclear chromosome	cellular_component	0.013327	0.20505		GO:2001234	negative regulation of apoptotic signaling pathway	biological_process	0.012001	0.18478
GO:0010510	regulation of acetyl-CoA biosynthetic process from pyruvate	biological_process	0.013347	0.2052		GO:0010894	negative regulation of steroid biosynthetic process	biological_process	0.012016	0.18481
GO:0021695	cerebellar cortex development	biological_process	0.013371	0.20535		GO:0048820	hair follicle maturation	biological_process	0.012021	0.18481
GO:0009295	nucleoid	cellular_component	0.013386	0.20535		GO:0019217	regulation of fatty acid metabolic process	biological_process	0.012052	0.18515
GO:0042645	mitochondrial nucleoid	cellular_component	0.013386	0.20535		GO:0006760	folic acid-containing compound metabolic process	biological_process	0.012065	0.18522
GO:0032392	DNA geometric change	biological_process	0.013396	0.20535		GO:1903829	positive regulation of cellular protein localization	biological_process	0.012092	0.1855
GO:0007221	positive regulation of transcription of Notch receptor target	biological_process	0.013476	0.20641		GO:0040011	locomotion	biological_process	0.012102	0.18552
GO:0043271	negative regulation of ion transport	biological_process	0.013541	0.20726		GO:0035196	production of miRNAs involved in gene silencing by miRNA	biological_process	0.012133	0.18577
GO:0010917	negative regulation of mitochondrial membrane potential	biological_process	0.013609	0.20788		GO:0030371	translation repressor activity	molecular_function	0.012137	0.18577
GO:0021549	cerebellum development	biological_process	0.013612	0.20788		GO:0032587	ruffle membrane	cellular_component	0.012208	0.18672
GO:0008284	positive regulation of cell proliferation	biological_process	0.013614	0.20788		GO:0060541	respiratory system development	biological_process	0.012218	0.18673
GO:0070988	demethylation	biological_process	0.013634	0.20788		GO:0045744	negative regulation of G-protein coupled receptor protein signaling pathway	biological_process	0.012237	0.18688
GO:1900745	positive regulation of p38MAPK cascade	biological_process	0.013641	0.20788		GO:1900364	negative regulation of mRNA polyadenylation	biological_process	0.012302	0.18763
GO:0070897	DNA-templated transcriptional preinitiation complex assembly	biological_process	0.013641	0.20788		GO:0090303	positive regulation of wound healing	biological_process	0.012309	0.18763
GO:0033197	response to vitamin E	biological_process	0.01376	0.20953		GO:0051336	regulation of hydrolase activity	biological_process	0.012313	0.18763
GO:0032880	regulation of protein localization	biological_process	0.013779	0.20967		GO:0014812	muscle cell migration	biological_process	0.012354	0.18801
GO:0031056	regulation of histone modification	biological_process	0.01382	0.21013		GO:1901420	negative regulation of response to alcohol	biological_process	0.012356	0.18801
GO:0008601	protein phosphatase type 2A regulator activity	molecular_function	0.013847	0.2104		GO:0000118	histone deacetylase complex	cellular_component	0.012431	0.18894
GO:0032459	regulation of protein oligomerization	biological_process	0.013881	0.21076		GO:0060762	regulation of branching involved in mammary gland duct morphogenesis	biological_process	0.012435	0.18894
GO:0006782	protoporphyrinogen IX biosynthetic process	biological_process	0.013922	0.21111		GO:0019060	intracellular transport of viral protein in host cell	biological_process	0.012455	0.18911
GO:0051085	chaperone mediated protein folding requiring cofactor	biological_process	0.013933	0.21111		GO:0006376	mRNA splice site selection	biological_process	0.012508	0.18964
GO:0044421	extracellular region part	cellular_component	0.013935	0.21111		GO:0016504	peptidase activator activity	molecular_function	0.012508	0.18964
GO:0048546	digestive tract morphogenesis	biological_process	0.013972	0.21151		GO:0072431	signal transduction involved in mitotic G1 DNA damage checkpoint	biological_process	0.012594	0.19066
GO:0030854	positive regulation of granulocyte differentiation	biological_process	0.013982	0.21152		GO:1902400	intracellular signal transduction involved in G1 DNA damage checkpoint	biological_process	0.012594	0.19066
GO:0070076	histone lysine demethylation	biological_process	0.014004	0.2117		GO:0042162	telomeric DNA binding	molecular_function	0.012626	0.191
GO:0002520	immune system development	biological_process	0.014121	0.213		GO:0051647	nucleus localization	biological_process	0.012672	0.19156
GO:0008143	poly(A) binding	molecular_function	0.014128	0.213		GO:0035268	protein mannosylation	biological_process	0.012726	0.19223
GO:0060031	mediolateral intercalation	biological_process	0.014131	0.213		GO:0043951	negative regulation of cAMP-mediated signaling	biological_process	0.01276	0.1926
GO:0060775	planar cell polarity pathway involved in gastrula mediolateral intercalation	biological_process	0.014131	0.213		GO:0031935	regulation of chromatin silencing	biological_process	0.012815	0.1933
GO:0010960	magnesium ion homeostasis	biological_process	0.014159	0.21326		GO:2000727	positive regulation of cardiac muscle cell differentiation	biological_process	0.012844	0.1936
GO:0003729	mRNA binding	molecular_function	0.014178	0.21339		GO:0061383	trabecula morphogenesis	biological_process	0.012859	0.19367
GO:0032906	transforming growth factor beta2 production	biological_process	0.014247	0.21411		GO:0032449	CBM complex	cellular_component	0.012911	0.19415
GO:0032909	regulation of transforming growth factor beta2 production	biological_process	0.014247	0.21411		GO:0030234	enzyme regulator activity	molecular_function	0.012913	0.19415
GO:0031434	mitogen-activated protein kinase kinase binding	molecular_function	0.014279	0.21445		GO:0090283	regulation of protein glycosylation in Golgi	biological_process	0.012918	0.19415
GO:0003677	DNA binding	molecular_function	0.014307	0.21471		GO:0031547	brain-derived neurotrophic factor receptor signaling pathway	biological_process	0.01293	0.19419
GO:0008289	lipid binding	molecular_function	0.014332	0.21493		GO:0004924	oncostatin-M receptor activity	molecular_function	0.012993	0.19498
GO:0060764	cell-cell signaling involved in mammary gland development	biological_process	0.014357	0.21515		GO:0031390	Ctf18 RFC-like complex	cellular_component	0.013033	0.19512
GO:0005080	protein kinase C binding	molecular_function	0.014377	0.21525		GO:1900262	regulation of DNA-directed DNA polymerase activity	biological_process	0.013033	0.19512
GO:1990590	ATF1-ATF4 transcription factor complex	cellular_component	0.014385	0.21525		GO:1900264	positive regulation of DNA-directed DNA polymerase activity	biological_process	0.013033	0.19512
GO:0019673	GDP-mannose metabolic process	biological_process	0.014548	0.21754		GO:0010888	negative regulation of lipid storage	biological_process	0.013039	0.19512
GO:0034418	urate biosynthetic process	biological_process	0.014572	0.21762		GO:0097300	programmed necrotic cell death	biological_process	0.013066	0.19538
GO:0046597	negative regulation of viral entry into host cell	biological_process	0.014575	0.21762		GO:1904589	regulation of protein import	biological_process	0.01309	0.19559
GO:0048710	regulation of astrocyte differentiation	biological_process	0.014658	0.21871		GO:0017053	transcriptional repressor complex	cellular_component	0.013111	0.19577
GO:0031330	negative regulation of cellular catabolic process	biological_process	0.014679	0.21873		GO:0035265	organ growth	biological_process	0.013247	0.19766
GO:0016875	ligase activity, forming carbon-oxygen bonds	molecular_function	0.014708	0.21873		GO:0071705	nitrogen compound transport	biological_process	0.013306	0.19839
GO:0016876	ligase activity, forming aminoacyl-tRNA and related compounds	molecular_function	0.014708	0.21873		GO:1903364	positive regulation of cellular protein catabolic process	biological_process	0.013371	0.19902
GO:0016126	sterol biosynthetic process	biological_process	0.01472	0.21873		GO:0006221	pyrimidine nucleotide biosynthetic process	biological_process	0.013376	0.19902
GO:0010888	negative regulation of lipid storage	biological_process	0.014725	0.21873		GO:0043921	modulation by host of viral transcription	biological_process	0.013386	0.19902
GO:0030522	intracellular receptor signaling pathway	biological_process	0.014757	0.21873		GO:0052472	modulation by host of symbiont transcription	biological_process	0.013386	0.19902
GO:2000188	regulation of cholesterol homeostasis	biological_process	0.014758	0.21873		GO:0009395	phospholipid catabolic process	biological_process	0.01341	0.19909
GO:0061024	membrane organization	biological_process	0.014769	0.21873		GO:0031262	Ndc80 complex	cellular_component	0.013418	0.19909
GO:0060837	blood vessel endothelial cell differentiation	biological_process	0.014773	0.21873		GO:0019218	regulation of steroid metabolic process	biological_process	0.01342	0.19909
GO:2000777	positive regulation of proteasomal ubiquitin-dependent protein catabolic process involved in cellular response to hypoxia	biological_process	0.014774	0.21873		GO:0016072	rRNA metabolic process	biological_process	0.013441	0.19923
GO:0032508	DNA duplex unwinding	biological_process	0.014775	0.21873		GO:0043974	histone H3-K27 acetylation	biological_process	0.013458	0.19923
GO:0009648	photoperiodism	biological_process	0.014791	0.21881		GO:1901674	regulation of histone H3-K27 acetylation	biological_process	0.013458	0.19923
GO:0071306	cellular response to vitamin E	biological_process	0.014825	0.21915		GO:0019905	syntaxin binding	molecular_function	0.013482	0.19944
GO:0031346	positive regulation of cell projection organization	biological_process	0.014872	0.21958		GO:0072395	signal transduction involved in cell cycle checkpoint	biological_process	0.013581	0.20077
GO:0097165	nuclear stress granule	cellular_component	0.014875	0.21958		GO:0000151	ubiquitin ligase complex	cellular_component	0.013668	0.20177
GO:0002092	positive regulation of receptor internalization	biological_process	0.014938	0.22035		GO:0051097	negative regulation of helicase activity	biological_process	0.013674	0.20177
GO:0031057	negative regulation of histone modification	biological_process	0.014976	0.22047		GO:0071498	cellular response to fluid shear stress	biological_process	0.013679	0.20177
GO:0071498	cellular response to fluid shear stress	biological_process	0.014991	0.22047		GO:1901216	positive regulation of neuron death	biological_process	0.013706	0.20204
GO:0048534	hematopoietic or lymphoid organ development	biological_process	0.014999	0.22047		GO:0015288	porin activity	molecular_function	0.013761	0.20269
GO:0003868	4-hydroxyphenylpyruvate dioxygenase activity	molecular_function	0.015008	0.22047		GO:0007265	Ras protein signal transduction	biological_process	0.013772	0.20269
GO:0009127	purine nucleoside monophosphate biosynthetic process	biological_process	0.01501	0.22047		GO:0050730	regulation of peptidyl-tyrosine phosphorylation	biological_process	0.013783	0.20269
GO:0009168	purine ribonucleoside monophosphate biosynthetic process	biological_process	0.01501	0.22047		GO:0030148	sphingolipid biosynthetic process	biological_process	0.013789	0.20269
GO:0042752	regulation of circadian rhythm	biological_process	0.015025	0.22053		GO:0006928	movement of cell or subcellular component	biological_process	0.013818	0.20296
GO:0035767	endothelial cell chemotaxis	biological_process	0.015299	0.22429		GO:0048771	tissue remodeling	biological_process	0.013836	0.20307
GO:0016311	dephosphorylation	biological_process	0.015302	0.22429		GO:0010039	response to iron ion	biological_process	0.013856	0.20307
GO:0050730	regulation of peptidyl-tyrosine phosphorylation	biological_process	0.015366	0.22507		GO:0016578	histone deubiquitination	biological_process	0.013861	0.20307
GO:0031102	neuron projection regeneration	biological_process	0.015428	0.22582		GO:0007440	foregut morphogenesis	biological_process	0.013864	0.20307
GO:0060644	mammary gland epithelial cell differentiation	biological_process	0.015484	0.22628		GO:0060135	maternal process involved in female pregnancy	biological_process	0.013876	0.20309
GO:1902578	single-organism localization	biological_process	0.015488	0.22628		GO:0016248	channel inhibitor activity	molecular_function	0.01393	0.20366
GO:2000342	negative regulation of chemokine (C-X-C motif) ligand 2 production	biological_process	0.015493	0.22628		GO:0070542	response to fatty acid	biological_process	0.013934	0.20366
GO:0031415	NatA complex	cellular_component	0.015503	0.22628		GO:0030335	positive regulation of cell migration	biological_process	0.013953	0.20377
GO:0098588	bounding membrane of organelle	cellular_component	0.01554	0.22665		GO:0045606	positive regulation of epidermal cell differentiation	biological_process	0.013962	0.20377
GO:0032210	regulation of telomere maintenance via telomerase	biological_process	0.015558	0.22675		GO:0010800	positive regulation of peptidyl-threonine phosphorylation	biological_process	0.014026	0.20457
GO:0061383	trabecula morphogenesis	biological_process	0.015571	0.22678		GO:0045955	negative regulation of calcium ion-dependent exocytosis	biological_process	0.014091	0.20538
GO:0060534	trachea cartilage development	biological_process	0.015592	0.22685		GO:0006665	sphingolipid metabolic process	biological_process	0.014123	0.2057
GO:0042327	positive regulation of phosphorylation	biological_process	0.015598	0.22685		GO:0035411	catenin import into nucleus	biological_process	0.014145	0.20587
GO:0010575	positive regulation of vascular endothelial growth factor production	biological_process	0.015611	0.22689		GO:0019103	pyrimidine nucleotide binding	molecular_function	0.014165	0.20602
GO:0018352	protein-pyridoxal-5-phosphate linkage	biological_process	0.015628	0.22698		GO:0043202	lysosomal lumen	cellular_component	0.014175	0.20602
GO:0070557	PCNA-p21 complex	cellular_component	0.015646	0.22708		GO:0006283	transcription-coupled nucleotide-excision repair	biological_process	0.014197	0.20611
GO:2000142	regulation of DNA-templated transcription, initiation	biological_process	0.015719	0.22798		GO:0035162	embryonic hemopoiesis	biological_process	0.014201	0.20611
GO:0016202	regulation of striated muscle tissue development	biological_process	0.015766	0.22851		GO:0016763	transferase activity, transferring pentosyl groups	molecular_function	0.014214	0.20616
GO:0019887	protein kinase regulator activity	molecular_function	0.01586	0.22971		GO:1902744	negative regulation of lamellipodium organization	biological_process	0.014227	0.2062
GO:0016234	inclusion body	cellular_component	0.015887	0.22994		GO:0010874	regulation of cholesterol efflux	biological_process	0.014275	0.20674
GO:0019808	polyamine binding	molecular_function	0.015902	0.22998		GO:0061008	hepaticobiliary system development	biological_process	0.014321	0.20715
GO:1900195	positive regulation of oocyte maturation	biological_process	0.015948	0.2305		GO:0061077	chaperone-mediated protein folding	biological_process	0.014332	0.20715
GO:0001704	formation of primary germ layer	biological_process	0.016019	0.23136		GO:0048146	positive regulation of fibroblast proliferation	biological_process	0.014333	0.20715
GO:0044454	nuclear chromosome part	cellular_component	0.016031	0.23138		GO:0031960	response to corticosteroid	biological_process	0.014406	0.20806
GO:0061394	regulation of transcription from RNA polymerase II promoter in response to arsenic-containing substance	biological_process	0.016104	0.23217		GO:0043402	glucocorticoid mediated signaling pathway	biological_process	0.014433	0.2083
GO:0051310	metaphase plate congression	biological_process	0.016125	0.23217		GO:1903689	regulation of wound healing, spreading of epidermal cells	biological_process	0.014616	0.2108
GO:0005006	epidermal growth factor-activated receptor activity	molecular_function	0.016141	0.23217		GO:1900006	positive regulation of dendrite development	biological_process	0.014702	0.2119
GO:0006695	cholesterol biosynthetic process	biological_process	0.016142	0.23217		GO:0030521	androgen receptor signaling pathway	biological_process	0.014759	0.21246
GO:1902653	secondary alcohol biosynthetic process	biological_process	0.016142	0.23217		GO:0043565	sequence-specific DNA binding	molecular_function	0.014762	0.21246
GO:0016281	eukaryotic translation initiation factor 4F complex	cellular_component	0.016184	0.23261		GO:0072655	establishment of protein localization to mitochondrion	biological_process	0.014818	0.21313
GO:0030036	actin cytoskeleton organization	biological_process	0.016202	0.23271		GO:0030323	respiratory tube development	biological_process	0.014865	0.21361
GO:0071702	organic substance transport	biological_process	0.01625	0.2329		GO:0015846	polyamine transport	biological_process	0.014884	0.21361
GO:0007494	midgut development	biological_process	0.016257	0.2329		GO:0046697	decidualization	biological_process	0.014886	0.21361
GO:0004708	MAP kinase kinase activity	molecular_function	0.016261	0.2329		GO:0048821	erythrocyte development	biological_process	0.014893	0.21361
GO:0060638	mesenchymal-epithelial cell signaling	biological_process	0.016275	0.2329		GO:0042733	embryonic digit morphogenesis	biological_process	0.014922	0.21365
GO:0021772	olfactory bulb development	biological_process	0.016282	0.2329		GO:0006790	sulfur compound metabolic process	biological_process	0.014924	0.21365
GO:0032330	regulation of chondrocyte differentiation	biological_process	0.016283	0.2329		GO:0032487	regulation of Rap protein signal transduction	biological_process	0.014926	0.21365
GO:0006637	acyl-CoA metabolic process	biological_process	0.016315	0.23303		GO:0071548	response to dexamethasone	biological_process	0.014948	0.21377
GO:0035383	thioester metabolic process	biological_process	0.016315	0.23303		GO:2001242	regulation of intrinsic apoptotic signaling pathway	biological_process	0.014956	0.21377
GO:0033570	transferrin transmembrane transporter activity	molecular_function	0.016352	0.23341		GO:0072413	signal transduction involved in mitotic cell cycle checkpoint	biological_process	0.014989	0.2138
GO:0071260	cellular response to mechanical stimulus	biological_process	0.016375	0.23357		GO:1902402	signal transduction involved in mitotic DNA damage checkpoint	biological_process	0.014989	0.2138
GO:0010891	negative regulation of sequestering of triglyceride	biological_process	0.016395	0.23361		GO:1902403	signal transduction involved in mitotic DNA integrity checkpoint	biological_process	0.014989	0.2138
GO:0032300	mismatch repair complex	cellular_component	0.0164	0.23361		GO:0031954	positive regulation of protein autophosphorylation	biological_process	0.015036	0.2142
GO:1901558	response to metformin	biological_process	0.016432	0.2339		GO:0045070	positive regulation of viral genome replication	biological_process	0.015037	0.2142
GO:0005165	neurotrophin receptor binding	molecular_function	0.016452	0.23402		GO:0001501	skeletal system development	biological_process	0.015122	0.21525
GO:0048625	myoblast fate commitment	biological_process	0.016511	0.23471		GO:0008408	3'-5' exonuclease activity	molecular_function	0.015141	0.21538
GO:0061180	mammary gland epithelium development	biological_process	0.016542	0.23499		GO:0097157	pre-mRNA intronic binding	molecular_function	0.015154	0.21541
GO:0045899	positive regulation of RNA polymerase II transcriptional preinitiation complex assembly	biological_process	0.016612	0.23565		GO:0036119	response to platelet-derived growth factor	biological_process	0.015174	0.21555
GO:0010911	regulation of isomerase activity	biological_process	0.016622	0.23565		GO:0046890	regulation of lipid biosynthetic process	biological_process	0.015204	0.21584
GO:0010912	positive regulation of isomerase activity	biological_process	0.016622	0.23565		GO:0031995	insulin-like growth factor II binding	molecular_function	0.015252	0.21636
GO:0043022	ribosome binding	molecular_function	0.016703	0.23663		GO:0042306	regulation of protein import into nucleus	biological_process	0.015285	0.21668
GO:0043331	response to dsRNA	biological_process	0.01683	0.23826		GO:0031345	negative regulation of cell projection organization	biological_process	0.015348	0.21744
GO:0034332	adherens junction organization	biological_process	0.016855	0.23843		GO:1902083	negative regulation of peptidyl-cysteine S-nitrosylation	biological_process	0.015432	0.21837
GO:0043516	regulation of DNA damage response, signal transduction by p53 class mediator	biological_process	0.016865	0.23843		GO:0006469	negative regulation of protein kinase activity	biological_process	0.015435	0.21837
GO:0016331	morphogenesis of embryonic epithelium	biological_process	0.016926	0.23913		GO:0030374	ligand-dependent nuclear receptor transcription coactivator activity	molecular_function	0.015464	0.21848
GO:0018401	peptidyl-proline hydroxylation to 4-hydroxy-L-proline	biological_process	0.016997	0.23997		GO:0007009	plasma membrane organization	biological_process	0.015464	0.21848
GO:0072554	blood vessel lumenization	biological_process	0.017021	0.24014		GO:0031056	regulation of histone modification	biological_process	0.015488	0.21855
GO:0018209	peptidyl-serine modification	biological_process	0.017049	0.24033		GO:0035371	microtubule plus-end	cellular_component	0.015491	0.21855
GO:0001938	positive regulation of endothelial cell proliferation	biological_process	0.017057	0.24033		GO:0004674	protein serine/threonine kinase activity	molecular_function	0.015527	0.21882
GO:0000002	mitochondrial genome maintenance	biological_process	0.017095	0.24057		GO:0048534	hematopoietic or lymphoid organ development	biological_process	0.01553	0.21882
GO:0019217	regulation of fatty acid metabolic process	biological_process	0.017105	0.24057		GO:0048864	stem cell development	biological_process	0.015594	0.21956
GO:0001756	somitogenesis	biological_process	0.017115	0.24057		GO:0032956	regulation of actin cytoskeleton organization	biological_process	0.015625	0.21986
GO:0055024	regulation of cardiac muscle tissue development	biological_process	0.017127	0.24057		GO:0030511	positive regulation of transforming growth factor beta receptor signaling pathway	biological_process	0.015726	0.22097
GO:0070245	positive regulation of thymocyte apoptotic process	biological_process	0.017132	0.24057		GO:1903846	positive regulation of cellular response to transforming growth factor beta stimulus	biological_process	0.015726	0.22097
GO:0033500	carbohydrate homeostasis	biological_process	0.017162	0.24066		GO:0001889	liver development	biological_process	0.015861	0.22272
GO:0042593	glucose homeostasis	biological_process	0.017162	0.24066		GO:0032434	regulation of proteasomal ubiquitin-dependent protein catabolic process	biological_process	0.015901	0.22313
GO:0060428	lung epithelium development	biological_process	0.017267	0.24198		GO:1903533	regulation of protein targeting	biological_process	0.015949	0.22365
GO:0032366	intracellular sterol transport	biological_process	0.017303	0.24231		GO:0008584	male gonad development	biological_process	0.016008	0.22418
GO:0035064	methylated histone binding	molecular_function	0.017391	0.24332		GO:0046546	development of primary male sexual characteristics	biological_process	0.016008	0.22418
GO:0005109	frizzled binding	molecular_function	0.017401	0.24332		GO:0007095	mitotic G2 DNA damage checkpoint	biological_process	0.016101	0.22533
GO:1901898	negative regulation of relaxation of cardiac muscle	biological_process	0.01741	0.24332		GO:0003831	beta-N-acetylglucosaminylglycopeptide beta-1,4-galactosyltransferase activity	molecular_function	0.016174	0.2262
GO:0007249	I-kappaB kinase/NF-kappaB signaling	biological_process	0.017514	0.24461		GO:0051224	negative regulation of protein transport	biological_process	0.01622	0.22669
GO:0032873	negative regulation of stress-activated MAPK cascade	biological_process	0.017591	0.24535		GO:0055037	recycling endosome	cellular_component	0.016297	0.22761
GO:0070303	negative regulation of stress-activated protein kinase signaling cascade	biological_process	0.017591	0.24535		GO:0031985	Golgi cisterna	cellular_component	0.016338	0.22803
GO:2000738	positive regulation of stem cell differentiation	biological_process	0.017619	0.24558		GO:0009895	negative regulation of catabolic process	biological_process	0.016394	0.22856
GO:0071901	negative regulation of protein serine/threonine kinase activity	biological_process	0.017692	0.24635		GO:0045665	negative regulation of neuron differentiation	biological_process	0.016398	0.22856
GO:1903147	negative regulation of mitophagy	biological_process	0.017698	0.24635		GO:0010822	positive regulation of mitochondrion organization	biological_process	0.016476	0.22949
GO:0006984	ER-nucleus signaling pathway	biological_process	0.017768	0.24715		GO:0014912	negative regulation of smooth muscle cell migration	biological_process	0.016493	0.22958
GO:0006970	response to osmotic stress	biological_process	0.017796	0.24738		GO:0051302	regulation of cell division	biological_process	0.016537	0.22974
GO:0006650	glycerophospholipid metabolic process	biological_process	0.017819	0.24753		GO:0031050	dsRNA fragmentation	biological_process	0.016538	0.22974
GO:1903649	regulation of cytoplasmic transport	biological_process	0.017887	0.24821		GO:0070918	production of small RNA involved in gene silencing by RNA	biological_process	0.016538	0.22974
GO:0061037	negative regulation of cartilage development	biological_process	0.017892	0.24821		GO:0007229	integrin-mediated signaling pathway	biological_process	0.016634	0.23092
GO:0030111	regulation of Wnt signaling pathway	biological_process	0.01791	0.24828		GO:0050779	RNA destabilization	biological_process	0.016691	0.23156
GO:0032106	positive regulation of response to extracellular stimulus	biological_process	0.017932	0.24828		GO:0019783	ubiquitin-like protein-specific protease activity	molecular_function	0.016735	0.232
GO:0032109	positive regulation of response to nutrient levels	biological_process	0.017932	0.24828		GO:0035295	tube development	biological_process	0.016834	0.23323
GO:0009411	response to UV	biological_process	0.017976	0.24871		GO:0031668	cellular response to extracellular stimulus	biological_process	0.01692	0.23394
GO:1902988	neurofibrillary tangle assembly	biological_process	0.018015	0.24892		GO:0043623	cellular protein complex assembly	biological_process	0.016927	0.23394
GO:1902996	regulation of neurofibrillary tangle assembly	biological_process	0.018015	0.24892		GO:0006336	DNA replication-independent nucleosome assembly	biological_process	0.016931	0.23394
GO:0052547	regulation of peptidase activity	biological_process	0.018037	0.24906		GO:0034724	DNA replication-independent nucleosome organization	biological_process	0.016931	0.23394
GO:0044301	climbing fiber	cellular_component	0.018066	0.24927		GO:1901419	regulation of response to alcohol	biological_process	0.016969	0.2341
GO:0001936	regulation of endothelial cell proliferation	biological_process	0.018077	0.24927		GO:0016441	posttranscriptional gene silencing	biological_process	0.016976	0.2341
GO:1902359	Notch signaling pathway involved in somitogenesis	biological_process	0.018188	0.25029		GO:0035194	posttranscriptional gene silencing by RNA	biological_process	0.016976	0.2341
GO:1902366	regulation of Notch signaling pathway involved in somitogenesis	biological_process	0.018188	0.25029		GO:0048711	positive regulation of astrocyte differentiation	biological_process	0.017153	0.23639
GO:1902367	negative regulation of Notch signaling pathway involved in somitogenesis	biological_process	0.018188	0.25029		GO:0009314	response to radiation	biological_process	0.017173	0.2365
GO:0017016	Ras GTPase binding	molecular_function	0.018198	0.25029		GO:1904292	regulation of ERAD pathway	biological_process	0.01721	0.23682
GO:0002072	optic cup morphogenesis involved in camera-type eye development	biological_process	0.018218	0.25039		GO:0043044	ATP-dependent chromatin remodeling	biological_process	0.017219	0.23682
GO:0097411	hypoxia-inducible factor-1alpha signaling pathway	biological_process	0.018257	0.25076		GO:2000147	positive regulation of cell motility	biological_process	0.017257	0.23703
GO:0042990	regulation of transcription factor import into nucleus	biological_process	0.018368	0.25212		GO:0006987	activation of signaling protein activity involved in unfolded protein response	biological_process	0.017258	0.23703
GO:0019359	nicotinamide nucleotide biosynthetic process	biological_process	0.018483	0.25301		GO:0090435	protein localization to nuclear envelope	biological_process	0.01737	0.23825
GO:0019363	pyridine nucleotide biosynthetic process	biological_process	0.018483	0.25301		GO:0007183	SMAD protein complex assembly	biological_process	0.017374	0.23825
GO:0021891	olfactory bulb interneuron development	biological_process	0.018493	0.25301		GO:0005793	endoplasmic reticulum-Golgi intermediate compartment	cellular_component	0.01738	0.23825
GO:0016607	nuclear speck	cellular_component	0.018496	0.25301		GO:0040017	positive regulation of locomotion	biological_process	0.017401	0.23837
GO:0035601	protein deacylation	biological_process	0.018496	0.25301		GO:0002237	response to molecule of bacterial origin	biological_process	0.01746	0.23903
GO:0043254	regulation of protein complex assembly	biological_process	0.018506	0.25301		GO:0036503	ERAD pathway	biological_process	0.017529	0.23981
GO:0010260	organ senescence	biological_process	0.018531	0.25304		GO:0035035	histone acetyltransferase binding	molecular_function	0.017591	0.2405
GO:0070194	synaptonemal complex disassembly	biological_process	0.018533	0.25304		GO:0010811	positive regulation of cell-substrate adhesion	biological_process	0.017611	0.24061
GO:0048017	inositol lipid-mediated signaling	biological_process	0.018582	0.25355		GO:0051149	positive regulation of muscle cell differentiation	biological_process	0.017654	0.24095
GO:0004357	glutamate-cysteine ligase activity	molecular_function	0.018705	0.25455		GO:0006983	ER overload response	biological_process	0.017659	0.24095
GO:0017109	glutamate-cysteine ligase complex	cellular_component	0.018705	0.25455		GO:0048762	mesenchymal cell differentiation	biological_process	0.017821	0.243
GO:0097069	cellular response to thyroxine stimulus	biological_process	0.018705	0.25455		GO:0007219	Notch signaling pathway	biological_process	0.017863	0.24342
GO:1904387	cellular response to L-phenylalanine derivative	biological_process	0.018705	0.25455		GO:1903055	positive regulation of extracellular matrix organization	biological_process	0.017952	0.24447
GO:0051541	elastin metabolic process	biological_process	0.01873	0.25472		GO:0061000	negative regulation of dendritic spine development	biological_process	0.01799	0.24483
GO:0019871	sodium channel inhibitor activity	molecular_function	0.01882	0.25578		GO:1902895	positive regulation of pri-miRNA transcription from RNA polymerase II promoter	biological_process	0.018008	0.24491
GO:0016569	covalent chromatin modification	biological_process	0.018866	0.25625		GO:0055025	positive regulation of cardiac muscle tissue development	biological_process	0.018087	0.24583
GO:0031589	cell-substrate adhesion	biological_process	0.018926	0.25676		GO:0050773	regulation of dendrite development	biological_process	0.0181	0.24583
GO:0048596	embryonic camera-type eye morphogenesis	biological_process	0.018929	0.25676		GO:0033690	positive regulation of osteoblast proliferation	biological_process	0.018242	0.24761
GO:1902533	positive regulation of intracellular signal transduction	biological_process	0.019021	0.25784		GO:0090343	positive regulation of cell aging	biological_process	0.018279	0.24794
GO:0044449	contractile fiber part	cellular_component	0.019063	0.25824		GO:0045992	negative regulation of embryonic development	biological_process	0.018305	0.24803
GO:0051056	regulation of small GTPase mediated signal transduction	biological_process	0.019164	0.25929		GO:0007029	endoplasmic reticulum organization	biological_process	0.018309	0.24803
GO:0009298	GDP-mannose biosynthetic process	biological_process	0.019165	0.25929		GO:0002262	myeloid cell homeostasis	biological_process	0.018352	0.24829
GO:0005697	telomerase holoenzyme complex	cellular_component	0.019183	0.25936		GO:0044246	regulation of multicellular organismal metabolic process	biological_process	0.018353	0.24829
GO:0016491	oxidoreductase activity	molecular_function	0.019253	0.26013		GO:1901863	positive regulation of muscle tissue development	biological_process	0.018385	0.24857
GO:0097055	agmatine biosynthetic process	biological_process	0.019304	0.26065		GO:0071479	cellular response to ionizing radiation	biological_process	0.018427	0.24897
GO:1904035	regulation of epithelial cell apoptotic process	biological_process	0.019376	0.26132		GO:0015093	ferrous iron transmembrane transporter activity	molecular_function	0.018453	0.24917
GO:0090258	negative regulation of mitochondrial fission	biological_process	0.019392	0.26132		GO:0070301	cellular response to hydrogen peroxide	biological_process	0.018492	0.24953
GO:0032535	regulation of cellular component size	biological_process	0.0194	0.26132		GO:0097164	ammonium ion metabolic process	biological_process	0.01855	0.25015
GO:0007257	activation of JUN kinase activity	biological_process	0.019406	0.26132		GO:1903025	regulation of RNA polymerase II regulatory region sequence-specific DNA binding	biological_process	0.018574	0.25031
GO:0032103	positive regulation of response to external stimulus	biological_process	0.019417	0.26132		GO:0010875	positive regulation of cholesterol efflux	biological_process	0.018601	0.2505
GO:0048286	lung alveolus development	biological_process	0.019471	0.26188		GO:0003157	endocardium development	biological_process	0.018709	0.2518
GO:0046434	organophosphate catabolic process	biological_process	0.019524	0.26243		GO:1901800	positive regulation of proteasomal protein catabolic process	biological_process	0.018779	0.25257
GO:0072656	maintenance of protein location in mitochondrion	biological_process	0.01957	0.26288		GO:1903332	regulation of protein folding	biological_process	0.018804	0.25276
GO:0010634	positive regulation of epithelial cell migration	biological_process	0.019748	0.2651		GO:0045835	negative regulation of meiotic nuclear division	biological_process	0.018926	0.25423
GO:0021966	corticospinal neuron axon guidance	biological_process	0.019819	0.26588		GO:0009452	7-methylguanosine RNA capping	biological_process	0.019007	0.25498
GO:0098800	inner mitochondrial membrane protein complex	cellular_component	0.019856	0.2662		GO:0036260	RNA capping	biological_process	0.019007	0.25498
GO:0021889	olfactory bulb interneuron differentiation	biological_process	0.019894	0.26637		GO:0000086	G2/M transition of mitotic cell cycle	biological_process	0.019042	0.25529
GO:0031058	positive regulation of histone modification	biological_process	0.019894	0.26637		GO:0006370	7-methylguanosine mRNA capping	biological_process	0.019055	0.25529
GO:0006272	leading strand elongation	biological_process	0.01991	0.26639		GO:0010002	cardioblast differentiation	biological_process	0.01909	0.2556
GO:0021988	olfactory lobe development	biological_process	0.019921	0.26639		GO:0033260	nuclear DNA replication	biological_process	0.019194	0.25683
GO:0009328	phenylalanine-tRNA ligase complex	cellular_component	0.019972	0.26684		GO:0015949	nucleobase-containing small molecule interconversion	biological_process	0.019217	0.25697
GO:0048260	positive regulation of receptor-mediated endocytosis	biological_process	0.019981	0.26684		GO:0048026	positive regulation of mRNA splicing, via spliceosome	biological_process	0.019244	0.25708
GO:0008106	alcohol dehydrogenase (NADP+) activity	molecular_function	0.020089	0.26811		GO:0004526	ribonuclease P activity	molecular_function	0.019255	0.25708
GO:0032479	regulation of type I interferon production	biological_process	0.020104	0.26814		GO:0061418	regulation of transcription from RNA polymerase II promoter in response to hypoxia	biological_process	0.019263	0.25708
GO:0006897	endocytosis	biological_process	0.020131	0.26818		GO:0045876	positive regulation of sister chromatid cohesion	biological_process	0.019386	0.25847
GO:0090324	negative regulation of oxidative phosphorylation	biological_process	0.020136	0.26818		GO:0001893	maternal placenta development	biological_process	0.019391	0.25847
GO:0010822	positive regulation of mitochondrion organization	biological_process	0.020146	0.26818		GO:0030097	hemopoiesis	biological_process	0.019485	0.25931
GO:1900182	positive regulation of protein localization to nucleus	biological_process	0.020168	0.2683		GO:0003910	DNA ligase (ATP) activity	molecular_function	0.01949	0.25931
GO:0005813	centrosome	cellular_component	0.020204	0.26861		GO:0052312	modulation of transcription in other organism involved in symbiotic interaction	biological_process	0.019492	0.25931
GO:0005900	oncostatin-M receptor complex	cellular_component	0.020254	0.269		GO:0034453	microtubule anchoring	biological_process	0.019537	0.25975
GO:0030433	ER-associated ubiquitin-dependent protein catabolic process	biological_process	0.02026	0.269		GO:0001649	osteoblast differentiation	biological_process	0.019564	0.25993
GO:0035026	leading edge cell differentiation	biological_process	0.020332	0.2698		GO:1902803	regulation of synaptic vesicle transport	biological_process	0.01958	0.25998
GO:0005943	phosphatidylinositol 3-kinase complex, class IA	cellular_component	0.020369	0.2701		GO:2000279	negative regulation of DNA biosynthetic process	biological_process	0.019704	0.26146
GO:0098732	macromolecule deacylation	biological_process	0.02039	0.27022		GO:0032373	positive regulation of sterol transport	biological_process	0.019783	0.26216
GO:0010171	body morphogenesis	biological_process	0.020424	0.27049		GO:0032376	positive regulation of cholesterol transport	biological_process	0.019783	0.26216
GO:0033152	immunoglobulin V(D)J recombination	biological_process	0.020461	0.27068		GO:0070585	protein localization to mitochondrion	biological_process	0.019795	0.26216
GO:0044547	DNA topoisomerase binding	molecular_function	0.020486	0.27068		GO:0002520	immune system development	biological_process	0.019825	0.26232
GO:0070016	armadillo repeat domain binding	molecular_function	0.020488	0.27068		GO:0009176	pyrimidine deoxyribonucleoside monophosphate metabolic process	biological_process	0.019832	0.26232
GO:0070934	CRD-mediated mRNA stabilization	biological_process	0.02049	0.27068		GO:0000722	telomere maintenance via recombination	biological_process	0.019882	0.26267
GO:0030618	transforming growth factor beta receptor, pathway-specific cytoplasmic mediator activity	molecular_function	0.020508	0.27074		GO:0010950	positive regulation of endopeptidase activity	biological_process	0.019884	0.26267
GO:0004356	glutamate-ammonia ligase activity	molecular_function	0.020582	0.27103		GO:0008517	folic acid transporter activity	molecular_function	0.019913	0.26289
GO:0006542	glutamine biosynthetic process	biological_process	0.020582	0.27103		GO:0016363	nuclear matrix	cellular_component	0.019943	0.26312
GO:0016211	ammonia ligase activity	molecular_function	0.020582	0.27103		GO:0006284	base-excision repair	biological_process	0.020023	0.264
GO:0016880	acid-ammonia (or amide) ligase activity	molecular_function	0.020582	0.27103		GO:0045005	DNA-dependent DNA replication maintenance of fidelity	biological_process	0.020056	0.26401
GO:0072537	fibroblast activation	biological_process	0.020615	0.2713		GO:0035090	maintenance of apical/basal cell polarity	biological_process	0.020067	0.26401
GO:0043392	negative regulation of DNA binding	biological_process	0.020659	0.2717		GO:0045199	maintenance of epithelial cell apical/basal polarity	biological_process	0.020067	0.26401
GO:0030016	myofibril	cellular_component	0.020677	0.27177		GO:0042771	intrinsic apoptotic signaling pathway in response to DNA damage by p53 class mediator	biological_process	0.020074	0.26401
GO:0043484	regulation of RNA splicing	biological_process	0.020699	0.27182		GO:0009396	folic acid-containing compound biosynthetic process	biological_process	0.020342	0.26723
GO:0007369	gastrulation	biological_process	0.020707	0.27182		GO:0070087	chromo shadow domain binding	molecular_function	0.020345	0.26723
GO:0002062	chondrocyte differentiation	biological_process	0.020734	0.27199		GO:0046137	negative regulation of vitamin metabolic process	biological_process	0.020384	0.26757
GO:0031290	retinal ganglion cell axon guidance	biological_process	0.020781	0.27243		GO:0071156	regulation of cell cycle arrest	biological_process	0.020467	0.2685
GO:0070435	Shc-EGFR complex	cellular_component	0.020805	0.27258		GO:0010212	response to ionizing radiation	biological_process	0.020638	0.27056
GO:0032454	histone demethylase activity (H3-K9 specific)	molecular_function	0.020856	0.27296		GO:0045136	development of secondary sexual characteristics	biological_process	0.02065	0.27056
GO:0051542	elastin biosynthetic process	biological_process	0.02086	0.27296		GO:0070922	small RNA loading onto RISC	biological_process	0.020678	0.2707
GO:0010955	negative regulation of protein processing	biological_process	0.020898	0.27311		GO:0035412	regulation of catenin import into nucleus	biological_process	0.020687	0.2707
GO:1903318	negative regulation of protein maturation	biological_process	0.020898	0.27311		GO:0044236	multicellular organismal metabolic process	biological_process	0.020782	0.27159
GO:0006396	RNA processing	biological_process	0.020916	0.27317		GO:0006273	lagging strand elongation	biological_process	0.020782	0.27159
GO:0061640	cytoskeleton-dependent cytokinesis	biological_process	0.020952	0.27347		GO:0009226	nucleotide-sugar biosynthetic process	biological_process	0.020826	0.27199
GO:0002543	activation of blood coagulation via clotting cascade	biological_process	0.020992	0.27382		GO:0060087	relaxation of vascular smooth muscle	biological_process	0.020839	0.27199
GO:0009611	response to wounding	biological_process	0.02105	0.27441		GO:0032040	small-subunit processome	cellular_component	0.020881	0.27231
GO:0038189	neuropilin signaling pathway	biological_process	0.021139	0.27499		GO:0047115	trans-1,2-dihydrobenzene-1,2-diol dehydrogenase activity	molecular_function	0.02089	0.27231
GO:0038190	VEGF-activated neuropilin signaling pathway	biological_process	0.021139	0.27499		GO:0048634	regulation of muscle organ development	biological_process	0.020948	0.27291
GO:1902336	positive regulation of retinal ganglion cell axon guidance	biological_process	0.021139	0.27499		GO:0004032	alditol:NADP+ 1-oxidoreductase activity	molecular_function	0.020986	0.27323
GO:0014911	positive regulation of smooth muscle cell migration	biological_process	0.021161	0.27499		GO:0035457	cellular response to interferon-alpha	biological_process	0.021012	0.27339
GO:0060411	cardiac septum morphogenesis	biological_process	0.021202	0.27499		GO:0051272	positive regulation of cellular component movement	biological_process	0.021033	0.27341
GO:0032143	single thymine insertion binding	molecular_function	0.021206	0.27499		GO:0090068	positive regulation of cell cycle process	biological_process	0.021039	0.27341
GO:0032301	MutSalpha complex	cellular_component	0.021206	0.27499		GO:0051258	protein polymerization	biological_process	0.021167	0.2748
GO:0003954	NADH dehydrogenase activity	molecular_function	0.021228	0.27499		GO:0051055	negative regulation of lipid biosynthetic process	biological_process	0.021173	0.2748
GO:0008137	NADH dehydrogenase (ubiquinone) activity	molecular_function	0.021228	0.27499		GO:0033643	host cell part	cellular_component	0.021242	0.27552
GO:0050136	NADH dehydrogenase (quinone) activity	molecular_function	0.021228	0.27499		GO:0015037	peptide disulfide oxidoreductase activity	molecular_function	0.021265	0.27565
GO:1904037	positive regulation of epithelial cell apoptotic process	biological_process	0.021303	0.27557		GO:1901989	positive regulation of cell cycle phase transition	biological_process	0.021373	0.27682
GO:1902957	negative regulation of mitochondrial electron transport, NADH to ubiquinone	biological_process	0.021314	0.27557		GO:0038127	ERBB signaling pathway	biological_process	0.021382	0.27682
GO:0035115	embryonic forelimb morphogenesis	biological_process	0.021329	0.27557		GO:0042558	pteridine-containing compound metabolic process	biological_process	0.021411	0.27688
GO:0030806	negative regulation of cyclic nucleotide catabolic process	biological_process	0.021339	0.27557		GO:0045118	azole transporter activity	molecular_function	0.021427	0.27688
GO:0030821	negative regulation of cAMP catabolic process	biological_process	0.021339	0.27557		GO:1901474	azole transmembrane transporter activity	molecular_function	0.021427	0.27688
GO:0060977	coronary vasculature morphogenesis	biological_process	0.021364	0.27562		GO:0045947	negative regulation of translational initiation	biological_process	0.021451	0.27703
GO:0001881	receptor recycling	biological_process	0.021369	0.27562		GO:0019992	diacylglycerol binding	molecular_function	0.0215	0.27749
GO:0045017	glycerolipid biosynthetic process	biological_process	0.021434	0.27628		GO:0000291	nuclear-transcribed mRNA catabolic process, exonucleolytic	biological_process	0.021586	0.27809
GO:0072687	meiotic spindle	cellular_component	0.021562	0.27749		GO:0010977	negative regulation of neuron projection development	biological_process	0.021587	0.27809
GO:0071277	cellular response to calcium ion	biological_process	0.021564	0.27749		GO:0030552	cAMP binding	molecular_function	0.021587	0.27809
GO:0060020	Bergmann glial cell differentiation	biological_process	0.021568	0.27749		GO:2000725	regulation of cardiac muscle cell differentiation	biological_process	0.021628	0.2784
GO:0009163	nucleoside biosynthetic process	biological_process	0.02164	0.27825		GO:0042594	response to starvation	biological_process	0.021638	0.2784
GO:0060147	regulation of posttranscriptional gene silencing	biological_process	0.021687	0.27867		GO:0030261	chromosome condensation	biological_process	0.021724	0.2793
GO:0019439	aromatic compound catabolic process	biological_process	0.021735	0.27912		GO:0051049	regulation of transport	biological_process	0.021735	0.2793
GO:0005657	replication fork	cellular_component	0.021793	0.2797		GO:0000182	rDNA binding	molecular_function	0.021785	0.2796
GO:0032410	negative regulation of transporter activity	biological_process	0.021851	0.28026		GO:0000030	mannosyltransferase activity	molecular_function	0.021795	0.2796
GO:0008142	oxysterol binding	molecular_function	0.021898	0.28069		GO:0007076	mitotic chromosome condensation	biological_process	0.021801	0.2796
GO:0016575	histone deacetylation	biological_process	0.021967	0.28141		GO:0046685	response to arsenic-containing substance	biological_process	0.021813	0.2796
GO:0032606	type I interferon production	biological_process	0.02202	0.28191		GO:0043902	positive regulation of multi-organism process	biological_process	0.021862	0.28006
GO:1990446	U1 snRNP binding	molecular_function	0.02206	0.28225		GO:0004820	glycine-tRNA ligase activity	molecular_function	0.021906	0.28028
GO:0042578	phosphoric ester hydrolase activity	molecular_function	0.022086	0.2824		GO:0006426	glycyl-tRNA aminoacylation	biological_process	0.021906	0.28028
GO:0003158	endothelium development	biological_process	0.022121	0.28248		GO:0030010	establishment of cell polarity	biological_process	0.021937	0.2805
GO:0050659	N-acetylgalactosamine 4-sulfate 6-O-sulfotransferase activity	molecular_function	0.022131	0.28248		GO:0071372	cellular response to follicle-stimulating hormone stimulus	biological_process	0.021995	0.28108
GO:0006476	protein deacetylation	biological_process	0.022133	0.28248		GO:1902001	fatty acid transmembrane transport	biological_process	0.02212	0.28249
GO:0033341	regulation of collagen binding	biological_process	0.022188	0.28302		GO:0045598	regulation of fat cell differentiation	biological_process	0.022251	0.28399
GO:0018108	peptidyl-tyrosine phosphorylation	biological_process	0.022205	0.28306		GO:1901861	regulation of muscle tissue development	biological_process	0.022373	0.28526
GO:0046983	protein dimerization activity	molecular_function	0.022222	0.2831		GO:0045596	negative regulation of cell differentiation	biological_process	0.022378	0.28526
GO:0072590	N-acetyl-L-aspartate-L-glutamate ligase activity	molecular_function	0.022267	0.28342		GO:0000900	translation repressor activity, nucleic acid binding	molecular_function	0.022504	0.28669
GO:0003169	coronary vein morphogenesis	biological_process	0.022278	0.28342		GO:0036314	response to sterol	biological_process	0.022525	0.28673
GO:0031548	regulation of brain-derived neurotrophic factor receptor signaling pathway	biological_process	0.022305	0.28342		GO:0000922	spindle pole	cellular_component	0.022534	0.28673
GO:0018216	peptidyl-arginine methylation	biological_process	0.022308	0.28342		GO:0032436	positive regulation of proteasomal ubiquitin-dependent protein catabolic process	biological_process	0.02262	0.28764
GO:0010596	negative regulation of endothelial cell migration	biological_process	0.022316	0.28342		GO:0090316	positive regulation of intracellular protein transport	biological_process	0.022669	0.28809
GO:0021577	hindbrain structural organization	biological_process	0.022395	0.28398		GO:1903050	regulation of proteolysis involved in cellular protein catabolic process	biological_process	0.022702	0.28833
GO:0021589	cerebellum structural organization	biological_process	0.022395	0.28398		GO:0042026	protein refolding	biological_process	0.022809	0.2895
GO:0051782	negative regulation of cell division	biological_process	0.022401	0.28398		GO:0048511	rhythmic process	biological_process	0.022836	0.2895
GO:1990666	PCSK9-LDLR complex	cellular_component	0.022487	0.2849		GO:0019136	deoxynucleoside kinase activity	molecular_function	0.022852	0.2895
GO:0033483	gas homeostasis	biological_process	0.022658	0.28669		GO:0006241	CTP biosynthetic process	biological_process	0.022879	0.2895
GO:0031577	spindle checkpoint	biological_process	0.022664	0.28669		GO:0046036	CTP metabolic process	biological_process	0.022879	0.2895
GO:0003213	cardiac right atrium morphogenesis	biological_process	0.02267	0.28669		GO:0030485	smooth muscle contractile fiber	cellular_component	0.022882	0.2895
GO:0010157	response to chlorate	biological_process	0.022731	0.28729		GO:0005938	cell cortex	cellular_component	0.022892	0.2895
GO:0045861	negative regulation of proteolysis	biological_process	0.02287	0.28887		GO:0030867	rough endoplasmic reticulum membrane	cellular_component	0.022924	0.2896
GO:0009880	embryonic pattern specification	biological_process	0.022887	0.2889		GO:0045807	positive regulation of endocytosis	biological_process	0.022928	0.2896
GO:0043087	regulation of GTPase activity	biological_process	0.022914	0.28908		GO:0000982	transcription factor activity, RNA polymerase II core promoter proximal region sequence-specific binding	molecular_function	0.023035	0.29072
GO:0021543	pallium development	biological_process	0.022986	0.28981		GO:0000123	histone acetyltransferase complex	cellular_component	0.02305	0.29072
GO:0090291	negative regulation of osteoclast proliferation	biological_process	0.023056	0.29051		GO:0061158	3'-UTR-mediated mRNA destabilization	biological_process	0.023058	0.29072
GO:0097421	liver regeneration	biological_process	0.023078	0.29061		GO:0016311	dephosphorylation	biological_process	0.023229	0.29255
GO:0090288	negative regulation of cellular response to growth factor stimulus	biological_process	0.023104	0.29077		GO:0044252	negative regulation of multicellular organismal metabolic process	biological_process	0.023239	0.29255
GO:0060236	regulation of mitotic spindle organization	biological_process	0.023161	0.29131		GO:1903391	regulation of adherens junction organization	biological_process	0.023251	0.29255
GO:0061077	chaperone-mediated protein folding	biological_process	0.023277	0.29258		GO:0051817	modification of morphology or physiology of other organism involved in symbiotic interaction	biological_process	0.02326	0.29255
GO:0035264	multicellular organism growth	biological_process	0.02335	0.29265		GO:0060136	embryonic process involved in female pregnancy	biological_process	0.023298	0.2926
GO:0043951	negative regulation of cAMP-mediated signaling	biological_process	0.023354	0.29265		GO:0017069	snRNA binding	molecular_function	0.023308	0.2926
GO:0043388	positive regulation of DNA binding	biological_process	0.023363	0.29265		GO:0032940	secretion by cell	biological_process	0.023315	0.2926
GO:0060931	sinoatrial node cell development	biological_process	0.023363	0.29265		GO:0009303	rRNA transcription	biological_process	0.023327	0.2926
GO:0007045	cell-substrate adherens junction assembly	biological_process	0.023367	0.29265		GO:0004519	endonuclease activity	molecular_function	0.023343	0.2926
GO:0048041	focal adhesion assembly	biological_process	0.023367	0.29265		GO:0031087	deadenylation-independent decapping of nuclear-transcribed mRNA	biological_process	0.02335	0.2926
GO:0007264	small GTPase mediated signal transduction	biological_process	0.023398	0.2928		GO:0031669	cellular response to nutrient levels	biological_process	0.023363	0.2926
GO:2000674	regulation of type B pancreatic cell apoptotic process	biological_process	0.023407	0.2928		GO:0051054	positive regulation of DNA metabolic process	biological_process	0.023386	0.2926
GO:0030199	collagen fibril organization	biological_process	0.023471	0.29342		GO:0005665	DNA-directed RNA polymerase II, core complex	cellular_component	0.023391	0.2926
GO:1901490	regulation of lymphangiogenesis	biological_process	0.023511	0.29375		GO:0070723	response to cholesterol	biological_process	0.023427	0.29287
GO:0005102	receptor binding	molecular_function	0.023588	0.2943		GO:0031297	replication fork processing	biological_process	0.023444	0.29291
GO:0042308	negative regulation of protein import into nucleus	biological_process	0.023598	0.2943		GO:0061087	positive regulation of histone H3-K27 methylation	biological_process	0.023475	0.29309
GO:1904590	negative regulation of protein import	biological_process	0.023598	0.2943		GO:0005775	vacuolar lumen	cellular_component	0.023488	0.29309
GO:0036402	proteasome-activating ATPase activity	molecular_function	0.023689	0.295		GO:2000108	positive regulation of leukocyte apoptotic process	biological_process	0.023501	0.29309
GO:0021636	trigeminal nerve morphogenesis	biological_process	0.023705	0.295		GO:0070044	synaptobrevin 2-SNAP-25-syntaxin-1a complex	cellular_component	0.023642	0.29449
GO:0021637	trigeminal nerve structural organization	biological_process	0.023705	0.295		GO:0045743	positive regulation of fibroblast growth factor receptor signaling pathway	biological_process	0.02365	0.29449
GO:1902668	negative regulation of axon guidance	biological_process	0.023713	0.295		GO:0070265	necrotic cell death	biological_process	0.023655	0.29449
GO:0036002	pre-mRNA binding	molecular_function	0.023738	0.295		GO:0061028	establishment of endothelial barrier	biological_process	0.023679	0.2946
GO:0038128	ERBB2 signaling pathway	biological_process	0.023741	0.295		GO:0036477	somatodendritic compartment	cellular_component	0.023741	0.29506
GO:0031958	corticosteroid receptor signaling pathway	biological_process	0.023759	0.295		GO:1904263	positive regulation of TORC1 signaling	biological_process	0.023756	0.29506
GO:0000387	spliceosomal snRNP assembly	biological_process	0.023768	0.295		GO:0097527	necroptotic signaling pathway	biological_process	0.023796	0.29506
GO:0016236	macroautophagy	biological_process	0.023785	0.29504		GO:0001833	inner cell mass cell proliferation	biological_process	0.02381	0.29506
GO:0005683	U7 snRNP	cellular_component	0.023871	0.29593		GO:0034644	cellular response to UV	biological_process	0.023816	0.29506
GO:0048015	phosphatidylinositol-mediated signaling	biological_process	0.023919	0.29634		GO:0070862	negative regulation of protein exit from endoplasmic reticulum	biological_process	0.02382	0.29506
GO:0007004	telomere maintenance via telomerase	biological_process	0.024002	0.29719		GO:1904153	negative regulation of retrograde protein transport, ER to cytosol	biological_process	0.02382	0.29506
GO:0050919	negative chemotaxis	biological_process	0.024258	0.30019		GO:0000792	heterochromatin	cellular_component	0.023829	0.29506
GO:0048313	Golgi inheritance	biological_process	0.024303	0.30025		GO:2001169	regulation of ATP biosynthetic process	biological_process	0.023872	0.2954
GO:0018212	peptidyl-tyrosine modification	biological_process	0.024305	0.30025		GO:0035097	histone methyltransferase complex	cellular_component	0.023908	0.29568
GO:0052548	regulation of endopeptidase activity	biological_process	0.024307	0.30025		GO:0071877	regulation of adrenergic receptor signaling pathway	biological_process	0.024208	0.29915
GO:0006367	transcription initiation from RNA polymerase II promoter	biological_process	0.024376	0.30093		GO:0004448	isocitrate dehydrogenase activity	molecular_function	0.024218	0.29915
GO:0045648	positive regulation of erythrocyte differentiation	biological_process	0.024453	0.30156		GO:0009753	response to jasmonic acid	biological_process	0.024271	0.29946
GO:0001841	neural tube formation	biological_process	0.024456	0.30156		GO:0071395	cellular response to jasmonic acid stimulus	biological_process	0.024271	0.29946
GO:0006605	protein targeting	biological_process	0.024514	0.30209		GO:2001237	negative regulation of extrinsic apoptotic signaling pathway	biological_process	0.024303	0.29967
GO:0006418	tRNA aminoacylation for protein translation	biological_process	0.024533	0.30214		GO:0070507	regulation of microtubule cytoskeleton organization	biological_process	0.024332	0.29977
GO:0060444	branching involved in mammary gland duct morphogenesis	biological_process	0.024631	0.30317		GO:1902804	negative regulation of synaptic vesicle transport	biological_process	0.02434	0.29977
GO:0000940	condensed chromosome outer kinetochore	cellular_component	0.024758	0.3044		GO:0010565	regulation of cellular ketone metabolic process	biological_process	0.024373	0.29987
GO:1901137	carbohydrate derivative biosynthetic process	biological_process	0.02476	0.3044		GO:0035384	thioester biosynthetic process	biological_process	0.024391	0.29987
GO:0048259	regulation of receptor-mediated endocytosis	biological_process	0.024958	0.30665		GO:0071616	acyl-CoA biosynthetic process	biological_process	0.024391	0.29987
GO:0042401	cellular biogenic amine biosynthetic process	biological_process	0.024978	0.30671		GO:0051346	negative regulation of hydrolase activity	biological_process	0.024434	0.30021
GO:0032868	response to insulin	biological_process	0.025033	0.30675		GO:0006002	fructose 6-phosphate metabolic process	biological_process	0.024497	0.30081
GO:0071623	negative regulation of granulocyte chemotaxis	biological_process	0.02504	0.30675		GO:0004843	ubiquitin-specific protease activity	molecular_function	0.024534	0.30109
GO:0090024	negative regulation of neutrophil chemotaxis	biological_process	0.02504	0.30675		GO:0038128	ERBB2 signaling pathway	biological_process	0.024567	0.30114
GO:1902623	negative regulation of neutrophil migration	biological_process	0.02504	0.30675		GO:0008637	apoptotic mitochondrial changes	biological_process	0.024579	0.30114
GO:0070507	regulation of microtubule cytoskeleton organization	biological_process	0.025106	0.30722		GO:0030155	regulation of cell adhesion	biological_process	0.024582	0.30114
GO:0035902	response to immobilization stress	biological_process	0.025122	0.30722		GO:0046929	negative regulation of neurotransmitter secretion	biological_process	0.02468	0.3021
GO:0043548	phosphatidylinositol 3-kinase binding	molecular_function	0.025128	0.30722		GO:0030193	regulation of blood coagulation	biological_process	0.024716	0.3021
GO:0042992	negative regulation of transcription factor import into nucleus	biological_process	0.025143	0.30722		GO:1900046	regulation of hemostasis	biological_process	0.024716	0.3021
GO:0014812	muscle cell migration	biological_process	0.025152	0.30722		GO:0002566	somatic diversification of immune receptors via somatic mutation	biological_process	0.024718	0.3021
GO:0043535	regulation of blood vessel endothelial cell migration	biological_process	0.025171	0.30727		GO:0003697	single-stranded DNA binding	molecular_function	0.024812	0.30288
GO:0031954	positive regulation of protein autophosphorylation	biological_process	0.025213	0.3076		GO:0009650	UV protection	biological_process	0.024824	0.30288
GO:0071004	U2-type prespliceosome	cellular_component	0.02524	0.30775		GO:0046900	tetrahydrofolylpolyglutamate metabolic process	biological_process	0.024826	0.30288
GO:0051224	negative regulation of protein transport	biological_process	0.025484	0.31054		GO:0043295	glutathione binding	molecular_function	0.02491	0.30372
GO:0014807	regulation of somitogenesis	biological_process	0.025604	0.31182		GO:1903052	positive regulation of proteolysis involved in cellular protein catabolic process	biological_process	0.025082	0.30564
GO:0046700	heterocycle catabolic process	biological_process	0.025664	0.31226		GO:0008309	double-stranded DNA exodeoxyribonuclease activity	molecular_function	0.025127	0.30601
GO:1901617	organic hydroxy compound biosynthetic process	biological_process	0.025678	0.31226		GO:0034139	regulation of toll-like receptor 3 signaling pathway	biological_process	0.025191	0.30651
GO:0016971	flavin-linked sulfhydryl oxidase activity	molecular_function	0.025687	0.31226		GO:1990782	protein tyrosine kinase binding	molecular_function	0.025198	0.30651
GO:0046578	regulation of Ras protein signal transduction	biological_process	0.0257	0.31226		GO:0045939	negative regulation of steroid metabolic process	biological_process	0.025231	0.30674
GO:0090316	positive regulation of intracellular protein transport	biological_process	0.025733	0.31247		GO:0019902	phosphatase binding	molecular_function	0.025392	0.30829
GO:0044106	cellular amine metabolic process	biological_process	0.025786	0.31294		GO:0048489	synaptic vesicle transport	biological_process	0.025414	0.30829
GO:0072337	modified amino acid transport	biological_process	0.025861	0.31366		GO:0097480	establishment of synaptic vesicle localization	biological_process	0.025414	0.30829
GO:0033598	mammary gland epithelial cell proliferation	biological_process	0.025967	0.31468		GO:0002039	p53 binding	molecular_function	0.025419	0.30829
GO:0004119	cGMP-inhibited cyclic-nucleotide phosphodiesterase activity	molecular_function	0.025976	0.31468		GO:0005795	Golgi stack	cellular_component	0.025457	0.30857
GO:0005684	U2-type spliceosomal complex	cellular_component	0.026017	0.315		GO:0039694	viral RNA genome replication	biological_process	0.025486	0.30857
GO:0034189	very-low-density lipoprotein particle binding	molecular_function	0.026066	0.31541		GO:0039703	RNA replication	biological_process	0.025486	0.30857
GO:0031648	protein destabilization	biological_process	0.026084	0.31544		GO:0002467	germinal center formation	biological_process	0.025549	0.30915
GO:1903747	regulation of establishment of protein localization to mitochondrion	biological_process	0.026133	0.3158		GO:0061157	mRNA destabilization	biological_process	0.02561	0.30971
GO:0098502	DNA dephosphorylation	biological_process	0.026144	0.3158		GO:0017075	syntaxin-1 binding	molecular_function	0.025646	0.3098
GO:0042398	cellular modified amino acid biosynthetic process	biological_process	0.026185	0.31612		GO:0006102	isocitrate metabolic process	biological_process	0.025663	0.3098
GO:0060100	positive regulation of phagocytosis, engulfment	biological_process	0.026223	0.31638		GO:0006714	sesquiterpenoid metabolic process	biological_process	0.025722	0.3098
GO:0070371	ERK1 and ERK2 cascade	biological_process	0.02624	0.3164		GO:0016107	sesquiterpenoid catabolic process	biological_process	0.025722	0.3098
GO:0050764	regulation of phagocytosis	biological_process	0.026303	0.31672		GO:0016487	farnesol metabolic process	biological_process	0.025722	0.3098
GO:1903847	regulation of aorta morphogenesis	biological_process	0.026312	0.31672		GO:0016488	farnesol catabolic process	biological_process	0.025722	0.3098
GO:1903849	positive regulation of aorta morphogenesis	biological_process	0.026312	0.31672		GO:0045550	geranylgeranyl reductase activity	molecular_function	0.025722	0.3098
GO:0016570	histone modification	biological_process	0.026346	0.31695		GO:0051589	negative regulation of neurotransmitter transport	biological_process	0.025752	0.30998
GO:0035907	dorsal aorta development	biological_process	0.026364	0.31698		GO:0017016	Ras GTPase binding	molecular_function	0.025827	0.3107
GO:0051783	regulation of nuclear division	biological_process	0.026437	0.31767		GO:0000723	telomere maintenance	biological_process	0.025867	0.31101
GO:1903901	negative regulation of viral life cycle	biological_process	0.02646	0.31776		GO:0042401	cellular biogenic amine biosynthetic process	biological_process	0.025953	0.31185
GO:0034066	RIC1-RGP1 guanyl-nucleotide exchange factor complex	cellular_component	0.026489	0.31793		GO:1902473	regulation of protein localization to synapse	biological_process	0.026017	0.31245
GO:0019933	cAMP-mediated signaling	biological_process	0.026638	0.31953		GO:0010008	endosome membrane	cellular_component	0.026045	0.31261
GO:0042991	transcription factor import into nucleus	biological_process	0.02675	0.32069		GO:0010172	embryonic body morphogenesis	biological_process	0.026292	0.31521
GO:0060562	epithelial tube morphogenesis	biological_process	0.026774	0.3208		GO:0008305	integrin complex	cellular_component	0.026293	0.31521
GO:2000275	regulation of oxidative phosphorylation uncoupler activity	biological_process	0.026802	0.32086		GO:1901976	regulation of cell cycle checkpoint	biological_process	0.026502	0.31754
GO:0031061	negative regulation of histone methylation	biological_process	0.026811	0.32086		GO:2001166	regulation of histone H2B ubiquitination	biological_process	0.026546	0.31769
GO:0001890	placenta development	biological_process	0.026892	0.32164		GO:2001168	positive regulation of histone H2B ubiquitination	biological_process	0.026546	0.31769
GO:0044765	single-organism transport	biological_process	0.026966	0.32219		GO:0051961	negative regulation of nervous system development	biological_process	0.026679	0.3191
GO:0000790	nuclear chromatin	cellular_component	0.026968	0.32219		GO:0051044	positive regulation of membrane protein ectodomain proteolysis	biological_process	0.026719	0.31923
GO:0001892	embryonic placenta development	biological_process	0.026994	0.32221		GO:0007096	regulation of exit from mitosis	biological_process	0.026745	0.31923
GO:0071287	cellular response to manganese ion	biological_process	0.027001	0.32221		GO:0030433	ER-associated ubiquitin-dependent protein catabolic process	biological_process	0.026777	0.31923
GO:0045064	T-helper 2 cell differentiation	biological_process	0.027027	0.32233		GO:0005655	nucleolar ribonuclease P complex	cellular_component	0.026782	0.31923
GO:0035458	cellular response to interferon-beta	biological_process	0.027042	0.32233		GO:0030677	ribonuclease P complex	cellular_component	0.026782	0.31923
GO:0002053	positive regulation of mesenchymal cell proliferation	biological_process	0.027077	0.32256		GO:0030681	multimeric ribonuclease P complex	cellular_component	0.026782	0.31923
GO:0008156	negative regulation of DNA replication	biological_process	0.0271	0.32264		GO:0018095	protein polyglutamylation	biological_process	0.026858	0.31996
GO:0070491	repressing transcription factor binding	molecular_function	0.027159	0.32301		GO:0030099	myeloid cell differentiation	biological_process	0.026897	0.32023
GO:0022616	DNA strand elongation	biological_process	0.027176	0.32301		GO:0043043	peptide biosynthetic process	biological_process	0.026932	0.32024
GO:0051259	protein oligomerization	biological_process	0.027177	0.32301		GO:0035985	senescence-associated heterochromatin focus	cellular_component	0.026938	0.32024
GO:1901659	glycosyl compound biosynthetic process	biological_process	0.027279	0.32404		GO:0021957	corticospinal tract morphogenesis	biological_process	0.026944	0.32024
GO:0050810	regulation of steroid biosynthetic process	biological_process	0.027352	0.32472		GO:0061684	chaperone-mediated autophagy	biological_process	0.027021	0.32097
GO:0004860	protein kinase inhibitor activity	molecular_function	0.027388	0.32496		GO:1901992	positive regulation of mitotic cell cycle phase transition	biological_process	0.027044	0.32104
GO:0016655	oxidoreductase activity, acting on NAD(P)H, quinone or similar compound as acceptor	molecular_function	0.027484	0.32592		GO:0007163	establishment or maintenance of cell polarity	biological_process	0.027058	0.32104
GO:0061311	cell surface receptor signaling pathway involved in heart development	biological_process	0.02766	0.32781		GO:0043966	histone H3 acetylation	biological_process	0.027173	0.32222
GO:0022613	ribonucleoprotein complex biogenesis	biological_process	0.027734	0.32849		GO:0006287	base-excision repair, gap-filling	biological_process	0.027258	0.32277
GO:0001085	RNA polymerase II transcription factor binding	molecular_function	0.027762	0.32864		GO:0042063	gliogenesis	biological_process	0.027264	0.32277
GO:0021559	trigeminal nerve development	biological_process	0.027861	0.32962		GO:0051235	maintenance of location	biological_process	0.027286	0.32277
GO:0021860	pyramidal neuron development	biological_process	0.027896	0.32985		GO:0016073	snRNA metabolic process	biological_process	0.027296	0.32277
GO:0009156	ribonucleoside monophosphate biosynthetic process	biological_process	0.027926	0.33002		GO:0071216	cellular response to biotic stimulus	biological_process	0.027297	0.32277
GO:0043292	contractile fiber	cellular_component	0.028022	0.33097		GO:0044292	dendrite terminus	cellular_component	0.027357	0.32329
GO:0090269	fibroblast growth factor production	biological_process	0.028059	0.33097		GO:0060443	mammary gland morphogenesis	biological_process	0.027413	0.3237
GO:0090270	regulation of fibroblast growth factor production	biological_process	0.028059	0.33097		GO:0051260	protein homooligomerization	biological_process	0.027432	0.3237
GO:0060966	regulation of gene silencing by RNA	biological_process	0.02807	0.33097		GO:0016050	vesicle organization	biological_process	0.027445	0.3237
GO:1904356	regulation of telomere maintenance via telomere lengthening	biological_process	0.028139	0.33148		GO:0061515	myeloid cell development	biological_process	0.02746	0.3237
GO:0048332	mesoderm morphogenesis	biological_process	0.028146	0.33148		GO:0000727	double-strand break repair via break-induced replication	biological_process	0.027469	0.3237
GO:0046839	phospholipid dephosphorylation	biological_process	0.028167	0.33155		GO:1902911	protein kinase complex	cellular_component	0.027554	0.3244
GO:0042776	mitochondrial ATP synthesis coupled proton transport	biological_process	0.028195	0.33169		GO:0009120	deoxyribonucleoside metabolic process	biological_process	0.027572	0.3244
GO:0042180	cellular ketone metabolic process	biological_process	0.028223	0.33183		GO:0042254	ribosome biogenesis	biological_process	0.027576	0.3244
GO:0090329	regulation of DNA-dependent DNA replication	biological_process	0.028331	0.33291		GO:0006930	substrate-dependent cell migration, cell extension	biological_process	0.027663	0.32504
GO:0030812	negative regulation of nucleotide catabolic process	biological_process	0.028437	0.33396		GO:0051020	GTPase binding	molecular_function	0.027675	0.32504
GO:0046596	regulation of viral entry into host cell	biological_process	0.028563	0.33526		GO:0007098	centrosome cycle	biological_process	0.027688	0.32504
GO:0032147	activation of protein kinase activity	biological_process	0.028591	0.33539		GO:0033143	regulation of intracellular steroid hormone receptor signaling pathway	biological_process	0.027693	0.32504
GO:0032092	positive regulation of protein binding	biological_process	0.028694	0.33642		GO:0070815	peptidyl-lysine 5-dioxygenase activity	molecular_function	0.027805	0.32613
GO:0060575	intestinal epithelial cell differentiation	biological_process	0.028861	0.33818		GO:0034596	phosphatidylinositol phosphate 4-phosphatase activity	molecular_function	0.027817	0.32613
GO:1903707	negative regulation of hemopoiesis	biological_process	0.028937	0.33872		GO:2000786	positive regulation of autophagosome assembly	biological_process	0.027941	0.3274
GO:0004596	peptide alpha-N-acetyltransferase activity	molecular_function	0.02894	0.33872		GO:0030165	PDZ domain binding	molecular_function	0.028026	0.32821
GO:0071359	cellular response to dsRNA	biological_process	0.028967	0.33875		GO:0051920	peroxiredoxin activity	molecular_function	0.028107	0.32898
GO:0030388	fructose 1,6-bisphosphate metabolic process	biological_process	0.028975	0.33875		GO:0032580	Golgi cisterna membrane	cellular_component	0.028197	0.32984
GO:0008361	regulation of cell size	biological_process	0.029116	0.34019		GO:0016202	regulation of striated muscle tissue development	biological_process	0.028271	0.33052
GO:0052813	phosphatidylinositol bisphosphate kinase activity	molecular_function	0.029131	0.34019		GO:0032200	telomere organization	biological_process	0.028313	0.33082
GO:0036473	cell death in response to oxidative stress	biological_process	0.029225	0.34073		GO:0060008	Sertoli cell differentiation	biological_process	0.028491	0.33266
GO:0010595	positive regulation of endothelial cell migration	biological_process	0.029232	0.34073		GO:0046132	pyrimidine ribonucleoside biosynthetic process	biological_process	0.028502	0.33266
GO:0046184	aldehyde biosynthetic process	biological_process	0.029233	0.34073		GO:0032868	response to insulin	biological_process	0.028552	0.33288
GO:0006085	acetyl-CoA biosynthetic process	biological_process	0.029251	0.34073		GO:0007409	axonogenesis	biological_process	0.028553	0.33288
GO:0005637	nuclear inner membrane	cellular_component	0.029259	0.34073		GO:0043331	response to dsRNA	biological_process	0.028599	0.33323
GO:2000144	positive regulation of DNA-templated transcription, initiation	biological_process	0.029276	0.34073		GO:0043094	cellular metabolic compound salvage	biological_process	0.028648	0.33345
GO:0090272	negative regulation of fibroblast growth factor production	biological_process	0.029307	0.34085		GO:0045616	regulation of keratinocyte differentiation	biological_process	0.02865	0.33345
GO:0032989	cellular component morphogenesis	biological_process	0.029319	0.34085		GO:0070577	lysine-acetylated histone binding	molecular_function	0.028812	0.33514
GO:0051084	'de novo' posttranslational protein folding	biological_process	0.029391	0.3415		GO:0002053	positive regulation of mesenchymal cell proliferation	biological_process	0.028834	0.33521
GO:0060323	head morphogenesis	biological_process	0.029472	0.34224		GO:0005521	lamin binding	molecular_function	0.029119	0.33834
GO:0008013	beta-catenin binding	molecular_function	0.02961	0.34349		GO:0046928	regulation of neurotransmitter secretion	biological_process	0.029205	0.33914
GO:0048706	embryonic skeletal system development	biological_process	0.029624	0.34349		GO:0043616	keratinocyte proliferation	biological_process	0.029274	0.33921
GO:0090101	negative regulation of transmembrane receptor protein serine/threonine kinase signaling pathway	biological_process	0.029629	0.34349		GO:0048408	epidermal growth factor binding	molecular_function	0.029279	0.33921
GO:0045023	G0 to G1 transition	biological_process	0.029722	0.34438		GO:0043122	regulation of I-kappaB kinase/NF-kappaB signaling	biological_process	0.029291	0.33921
GO:0033260	nuclear DNA replication	biological_process	0.029783	0.3449		GO:0001905	activation of membrane attack complex	biological_process	0.029292	0.33921
GO:1903309	negative regulation of chromatin modification	biological_process	0.029802	0.34491		GO:0001969	regulation of activation of membrane attack complex	biological_process	0.029292	0.33921
GO:0004707	MAP kinase activity	molecular_function	0.029859	0.34538		GO:0003727	single-stranded RNA binding	molecular_function	0.029318	0.33932
GO:0048708	astrocyte differentiation	biological_process	0.029994	0.34675		GO:2000675	negative regulation of type B pancreatic cell apoptotic process	biological_process	0.029388	0.33994
GO:0004712	protein serine/threonine/tyrosine kinase activity	molecular_function	0.030051	0.34721		GO:0030313	cell envelope	cellular_component	0.029423	0.34015
GO:0005112	Notch binding	molecular_function	0.030108	0.34768		GO:0008022	protein C-terminus binding	molecular_function	0.029483	0.34065
GO:2000323	negative regulation of glucocorticoid receptor signaling pathway	biological_process	0.030259	0.34923		GO:0061550	cranial ganglion development	biological_process	0.029603	0.34176
GO:0042805	actinin binding	molecular_function	0.030473	0.3515		GO:0005788	endoplasmic reticulum lumen	cellular_component	0.029612	0.34176
GO:0000835	ER ubiquitin ligase complex	cellular_component	0.030564	0.35236		GO:0050731	positive regulation of peptidyl-tyrosine phosphorylation	biological_process	0.029637	0.34187
GO:0003206	cardiac chamber morphogenesis	biological_process	0.030669	0.35337		GO:0031616	spindle pole centrosome	cellular_component	0.029674	0.3421
GO:0010921	regulation of phosphatase activity	biological_process	0.030754	0.35416		GO:0043008	ATP-dependent protein binding	molecular_function	0.029821	0.34346
GO:0006929	substrate-dependent cell migration	biological_process	0.030772	0.35417		GO:0045844	positive regulation of striated muscle tissue development	biological_process	0.02985	0.34346
GO:0010721	negative regulation of cell development	biological_process	0.030831	0.35455		GO:0048636	positive regulation of muscle organ development	biological_process	0.02985	0.34346
GO:0030902	hindbrain development	biological_process	0.03084	0.35455		GO:0004740	pyruvate dehydrogenase (acetyl-transferring) kinase activity	molecular_function	0.029858	0.34346
GO:0071482	cellular response to light stimulus	biological_process	0.030882	0.35485		GO:0016574	histone ubiquitination	biological_process	0.029912	0.34389
GO:0006489	dolichyl diphosphate biosynthetic process	biological_process	0.031033	0.35618		GO:0019003	GDP binding	molecular_function	0.029946	0.34408
GO:0046465	dolichyl diphosphate metabolic process	biological_process	0.031033	0.35618		GO:0033120	positive regulation of RNA splicing	biological_process	0.029962	0.34408
GO:0048285	organelle fission	biological_process	0.031106	0.35643		GO:0031201	SNARE complex	cellular_component	0.029986	0.34408
GO:0035904	aorta development	biological_process	0.031114	0.35643		GO:0004407	histone deacetylase activity	molecular_function	0.030012	0.34408
GO:0031014	troponin T binding	molecular_function	0.03112	0.35643		GO:0033558	protein deacetylase activity	molecular_function	0.030012	0.34408
GO:0004814	arginine-tRNA ligase activity	molecular_function	0.031153	0.35643		GO:1904018	positive regulation of vasculature development	biological_process	0.030076	0.34463
GO:0006420	arginyl-tRNA aminoacylation	biological_process	0.031153	0.35643		GO:0045840	positive regulation of mitotic nuclear division	biological_process	0.030093	0.34463
GO:0046486	glycerolipid metabolic process	biological_process	0.031157	0.35643		GO:0071345	cellular response to cytokine stimulus	biological_process	0.030247	0.3462
GO:0046485	ether lipid metabolic process	biological_process	0.031233	0.35709		GO:0032777	Piccolo NuA4 histone acetyltransferase complex	cellular_component	0.030528	0.34903
GO:0034047	regulation of protein phosphatase type 2A activity	biological_process	0.031255	0.35715		GO:0031267	small GTPase binding	molecular_function	0.030543	0.34903
GO:0050873	brown fat cell differentiation	biological_process	0.031305	0.35752		GO:0010837	regulation of keratinocyte proliferation	biological_process	0.030544	0.34903
GO:0016242	negative regulation of macroautophagy	biological_process	0.031356	0.35791		GO:0098813	nuclear chromosome segregation	biological_process	0.030583	0.34928
GO:0006626	protein targeting to mitochondrion	biological_process	0.031391	0.35812		GO:0046475	glycerophospholipid catabolic process	biological_process	0.03062	0.34951
GO:1903332	regulation of protein folding	biological_process	0.031445	0.35853		GO:0097167	circadian regulation of translation	biological_process	0.030682	0.35002
GO:0045071	negative regulation of viral genome replication	biological_process	0.031574	0.35981		GO:0030863	cortical cytoskeleton	cellular_component	0.03075	0.3506
GO:0055021	regulation of cardiac muscle tissue growth	biological_process	0.03162	0.36013		GO:0032006	regulation of TOR signaling	biological_process	0.030934	0.35251
GO:0016023	cytoplasmic membrane-bounded vesicle	cellular_component	0.031701	0.36085		GO:0008017	microtubule binding	molecular_function	0.031054	0.35369
GO:1903650	negative regulation of cytoplasmic transport	biological_process	0.0318	0.3615		GO:0003945	N-acetyllactosamine synthase activity	molecular_function	0.031122	0.35416
GO:0061014	positive regulation of mRNA catabolic process	biological_process	0.031806	0.3615		GO:0032968	positive regulation of transcription elongation from RNA polymerase II promoter	biological_process	0.03113	0.35416
GO:0009309	amine biosynthetic process	biological_process	0.031815	0.3615		GO:0030133	transport vesicle	cellular_component	0.031285	0.35527
GO:0010985	negative regulation of lipoprotein particle clearance	biological_process	0.031827	0.3615		GO:0004559	alpha-mannosidase activity	molecular_function	0.031297	0.35527
GO:0010256	endomembrane system organization	biological_process	0.031895	0.3619		GO:0030027	lamellipodium	cellular_component	0.031299	0.35527
GO:0005694	chromosome	cellular_component	0.031897	0.3619		GO:0046827	positive regulation of protein export from nucleus	biological_process	0.031299	0.35527
GO:0060973	cell migration involved in heart development	biological_process	0.031992	0.36277		GO:0016595	glutamate binding	molecular_function	0.031313	0.35527
GO:0035148	tube formation	biological_process	0.032049	0.36322		GO:0032330	regulation of chondrocyte differentiation	biological_process	0.031385	0.35589
GO:0046835	carbohydrate phosphorylation	biological_process	0.032121	0.36384		GO:0055038	recycling endosome membrane	cellular_component	0.03145	0.35626
GO:0008970	phosphatidylcholine 1-acylhydrolase activity	molecular_function	0.0322	0.36453		GO:0060350	endochondral bone morphogenesis	biological_process	0.03147	0.35626
GO:0016791	phosphatase activity	molecular_function	0.032266	0.36508		GO:0051893	regulation of focal adhesion assembly	biological_process	0.031486	0.35626
GO:0030514	negative regulation of BMP signaling pathway	biological_process	0.032288	0.36513		GO:0090109	regulation of cell-substrate junction assembly	biological_process	0.031486	0.35626
GO:0002060	purine nucleobase binding	molecular_function	0.032328	0.36539		GO:0048639	positive regulation of developmental growth	biological_process	0.031517	0.35642
GO:0051371	muscle alpha-actinin binding	molecular_function	0.032407	0.36586		GO:0071889	14-3-3 protein binding	molecular_function	0.031544	0.35653
GO:0051096	positive regulation of helicase activity	biological_process	0.03241	0.36586		GO:0045121	membrane raft	cellular_component	0.031615	0.35687
GO:0046488	phosphatidylinositol metabolic process	biological_process	0.032423	0.36586		GO:0046930	pore complex	cellular_component	0.031626	0.35687
GO:0036499	PERK-mediated unfolded protein response	biological_process	0.032466	0.36614		GO:0009162	deoxyribonucleoside monophosphate metabolic process	biological_process	0.031636	0.35687
GO:0050750	low-density lipoprotein particle receptor binding	molecular_function	0.032504	0.36638		GO:0000149	SNARE binding	molecular_function	0.031643	0.35687
GO:0033013	tetrapyrrole metabolic process	biological_process	0.032544	0.36663		GO:0042559	pteridine-containing compound biosynthetic process	biological_process	0.031694	0.35725
GO:0030552	cAMP binding	molecular_function	0.032668	0.36783		GO:0060340	positive regulation of type I interferon-mediated signaling pathway	biological_process	0.031715	0.35729
GO:1990782	protein tyrosine kinase binding	molecular_function	0.032712	0.36795		GO:0006663	platelet activating factor biosynthetic process	biological_process	0.031742	0.35739
GO:0043491	protein kinase B signaling	biological_process	0.032715	0.36795		GO:0015884	folic acid transport	biological_process	0.031839	0.35815
GO:0044455	mitochondrial membrane part	cellular_component	0.032748	0.36806		GO:0097526	spliceosomal tri-snRNP complex	cellular_component	0.031843	0.35815
GO:1902749	regulation of cell cycle G2/M phase transition	biological_process	0.03277	0.36806		GO:0001952	regulation of cell-matrix adhesion	biological_process	0.031941	0.35905
GO:0038089	positive regulation of cell migration by vascular endothelial growth factor signaling pathway	biological_process	0.032778	0.36806		GO:1902969	mitotic DNA replication	biological_process	0.032025	0.35981
GO:0006576	cellular biogenic amine metabolic process	biological_process	0.032798	0.36809		GO:0046661	male sex differentiation	biological_process	0.032051	0.3599
GO:0003887	DNA-directed DNA polymerase activity	molecular_function	0.032817	0.3681		GO:0005351	sugar:proton symporter activity	molecular_function	0.032141	0.3605
GO:0006086	acetyl-CoA biosynthetic process from pyruvate	biological_process	0.032975	0.36956		GO:0005402	cation:sugar symporter activity	molecular_function	0.032141	0.3605
GO:0043462	regulation of ATPase activity	biological_process	0.032982	0.36956		GO:0032557	pyrimidine ribonucleotide binding	molecular_function	0.032163	0.3605
GO:0001763	morphogenesis of a branching structure	biological_process	0.033025	0.36984		GO:0048667	cell morphogenesis involved in neuron differentiation	biological_process	0.032174	0.3605
GO:0010975	regulation of neuron projection development	biological_process	0.033139	0.37047		GO:1902750	negative regulation of cell cycle G2/M phase transition	biological_process	0.032309	0.36182
GO:0008543	fibroblast growth factor receptor signaling pathway	biological_process	0.033177	0.37047		GO:0006998	nuclear envelope organization	biological_process	0.032347	0.36203
GO:0048308	organelle inheritance	biological_process	0.033193	0.37047		GO:0000466	maturation of 5.8S rRNA from tricistronic rRNA transcript (SSU-rRNA, 5.8S rRNA, LSU-rRNA)	biological_process	0.032362	0.36203
GO:0045446	endothelial cell differentiation	biological_process	0.033207	0.37047		GO:0044433	cytoplasmic vesicle part	cellular_component	0.03252	0.36359
GO:0010257	NADH dehydrogenase complex assembly	biological_process	0.033207	0.37047		GO:0038031	non-canonical Wnt signaling pathway via JNK cascade	biological_process	0.032556	0.3638
GO:0032981	mitochondrial respiratory chain complex I assembly	biological_process	0.033207	0.37047		GO:0033687	osteoblast proliferation	biological_process	0.032682	0.36502
GO:0097031	mitochondrial respiratory chain complex I biogenesis	biological_process	0.033207	0.37047		GO:0061083	regulation of protein refolding	biological_process	0.032822	0.36618
GO:0061138	morphogenesis of a branching epithelium	biological_process	0.033254	0.3708		GO:0061084	negative regulation of protein refolding	biological_process	0.032822	0.36618
GO:0016605	PML body	cellular_component	0.033554	0.37394		GO:0036293	response to decreased oxygen levels	biological_process	0.032888	0.36672
GO:0030949	positive regulation of vascular endothelial growth factor receptor signaling pathway	biological_process	0.033582	0.374		GO:0016013	syntrophin complex	cellular_component	0.032941	0.36712
GO:0097201	negative regulation of transcription from RNA polymerase II promoter in response to stress	biological_process	0.033595	0.374		GO:0050435	beta-amyloid metabolic process	biological_process	0.032997	0.36735
GO:0071461	cellular response to redox state	biological_process	0.03366	0.37453		GO:0072132	mesenchyme morphogenesis	biological_process	0.032998	0.36735
GO:0006288	base-excision repair, DNA ligation	biological_process	0.033747	0.37529		GO:0010041	response to iron(III) ion	biological_process	0.033138	0.36862
GO:0046474	glycerophospholipid biosynthetic process	biological_process	0.033775	0.37539		GO:0008611	ether lipid biosynthetic process	biological_process	0.033203	0.36862
GO:0035268	protein mannosylation	biological_process	0.033827	0.37577		GO:0046504	glycerol ether biosynthetic process	biological_process	0.033203	0.36862
GO:0046834	lipid phosphorylation	biological_process	0.033941	0.37672		GO:0097384	cellular lipid biosynthetic process	biological_process	0.033203	0.36862
GO:0048525	negative regulation of viral process	biological_process	0.033949	0.37672		GO:1901503	ether biosynthetic process	biological_process	0.033203	0.36862
GO:0035733	hepatic stellate cell activation	biological_process	0.034007	0.37717		GO:0060561	apoptotic process involved in morphogenesis	biological_process	0.033219	0.36862
GO:0005072	transforming growth factor beta receptor, cytoplasmic mediator activity	molecular_function	0.034067	0.37763		GO:0040029	regulation of gene expression, epigenetic	biological_process	0.033287	0.36903
GO:0060842	arterial endothelial cell differentiation	biological_process	0.034102	0.37763		GO:2000171	negative regulation of dendrite development	biological_process	0.033291	0.36903
GO:0046823	negative regulation of nucleocytoplasmic transport	biological_process	0.034103	0.37763		GO:0031109	microtubule polymerization or depolymerization	biological_process	0.033414	0.37008
GO:0044091	membrane biogenesis	biological_process	0.03422	0.37871		GO:0010692	regulation of alkaline phosphatase activity	biological_process	0.033443	0.37008
GO:0072595	maintenance of protein localization in organelle	biological_process	0.034237	0.37871		GO:0003924	GTPase activity	molecular_function	0.033455	0.37008
GO:0072498	embryonic skeletal joint development	biological_process	0.034304	0.37912		GO:0044613	nuclear pore central transport channel	cellular_component	0.033457	0.37008
GO:0010566	regulation of ketone biosynthetic process	biological_process	0.034315	0.37912		GO:0007176	regulation of epidermal growth factor-activated receptor activity	biological_process	0.033482	0.37015
GO:0009308	amine metabolic process	biological_process	0.034329	0.37912		GO:0042180	cellular ketone metabolic process	biological_process	0.033633	0.37163
GO:0000982	transcription factor activity, RNA polymerase II core promoter proximal region sequence-specific binding	molecular_function	0.034348	0.37913		GO:0016413	O-acetyltransferase activity	molecular_function	0.033676	0.37171
GO:2000105	positive regulation of DNA-dependent DNA replication	biological_process	0.034386	0.37934		GO:0043928	exonucleolytic nuclear-transcribed mRNA catabolic process involved in deadenylation-dependent decay	biological_process	0.033676	0.37171
GO:0097386	glial cell projection	cellular_component	0.034406	0.37937		GO:0042979	ornithine decarboxylase regulator activity	molecular_function	0.033743	0.37225
GO:0005168	neurotrophin TRKA receptor binding	molecular_function	0.03451	0.3803		GO:0098575	lumenal side of lysosomal membrane	cellular_component	0.033785	0.37252
GO:1901136	carbohydrate derivative catabolic process	biological_process	0.034558	0.38055		GO:0007249	I-kappaB kinase/NF-kappaB signaling	biological_process	0.033824	0.37265
GO:0032970	regulation of actin filament-based process	biological_process	0.034569	0.38055		GO:0048872	homeostasis of number of cells	biological_process	0.033833	0.37265
GO:0043537	negative regulation of blood vessel endothelial cell migration	biological_process	0.034753	0.38237		GO:0035313	wound healing, spreading of epidermal cells	biological_process	0.033886	0.37268
GO:0036503	ERAD pathway	biological_process	0.035008	0.38494		GO:2000483	negative regulation of interleukin-8 secretion	biological_process	0.033915	0.37268
GO:0010887	negative regulation of cholesterol storage	biological_process	0.035042	0.38494		GO:0009223	pyrimidine deoxyribonucleotide catabolic process	biological_process	0.033936	0.37268
GO:0007009	plasma membrane organization	biological_process	0.035054	0.38494		GO:0002266	follicular dendritic cell activation	biological_process	0.033944	0.37268
GO:0070166	enamel mineralization	biological_process	0.03506	0.38494		GO:0002268	follicular dendritic cell differentiation	biological_process	0.033944	0.37268
GO:0046321	positive regulation of fatty acid oxidation	biological_process	0.035158	0.3858		GO:0033257	Bcl3/NF-kappaB2 complex	cellular_component	0.033944	0.37268
GO:1903310	positive regulation of chromatin modification	biological_process	0.035217	0.38625		GO:0032147	activation of protein kinase activity	biological_process	0.034058	0.3737
GO:0000281	mitotic cytokinesis	biological_process	0.035263	0.38655		GO:1990542	mitochondrial transmembrane transport	biological_process	0.034072	0.3737
GO:0032534	regulation of microvillus assembly	biological_process	0.035294	0.38662		GO:0033629	negative regulation of cell adhesion mediated by integrin	biological_process	0.034107	0.37388
GO:2001169	regulation of ATP biosynthetic process	biological_process	0.035307	0.38662		GO:0002943	tRNA dihydrouridine synthesis	biological_process	0.034217	0.37465
GO:0045638	negative regulation of myeloid cell differentiation	biological_process	0.035365	0.38682		GO:0017150	tRNA dihydrouridine synthase activity	molecular_function	0.034217	0.37465
GO:0044430	cytoskeletal part	cellular_component	0.035367	0.38682		GO:1902042	negative regulation of extrinsic apoptotic signaling pathway via death domain receptors	biological_process	0.034241	0.37465
GO:0030971	receptor tyrosine kinase binding	molecular_function	0.035381	0.38682		GO:0004711	ribosomal protein S6 kinase activity	molecular_function	0.03425	0.37465
GO:0010833	telomere maintenance via telomere lengthening	biological_process	0.035488	0.38779		GO:0004830	tryptophan-tRNA ligase activity	molecular_function	0.03432	0.37503
GO:0060443	mammary gland morphogenesis	biological_process	0.035519	0.38792		GO:0006436	tryptophanyl-tRNA aminoacylation	biological_process	0.03432	0.37503
GO:0006790	sulfur compound metabolic process	biological_process	0.035561	0.38807		GO:0072332	intrinsic apoptotic signaling pathway by p53 class mediator	biological_process	0.034493	0.37634
GO:0032135	DNA insertion or deletion binding	molecular_function	0.03557	0.38807		GO:0000469	cleavage involved in rRNA processing	biological_process	0.034513	0.37634
GO:0042692	muscle cell differentiation	biological_process	0.035721	0.38951		GO:0002384	hepatic immune response	biological_process	0.034516	0.37634
GO:1903798	regulation of production of miRNAs involved in gene silencing by miRNA	biological_process	0.035811	0.39017		GO:0033045	regulation of sister chromatid segregation	biological_process	0.034534	0.37634
GO:0090156	cellular sphingolipid homeostasis	biological_process	0.035819	0.39017		GO:0033047	regulation of mitotic sister chromatid segregation	biological_process	0.034534	0.37634
GO:0007435	salivary gland morphogenesis	biological_process	0.035927	0.39114		GO:1903749	positive regulation of establishment of protein localization to mitochondrion	biological_process	0.034549	0.37634
GO:0006972	hyperosmotic response	biological_process	0.035962	0.39132		GO:0032044	DSIF complex	cellular_component	0.034625	0.37696
GO:0032364	oxygen homeostasis	biological_process	0.036096	0.39243		GO:1901224	positive regulation of NIK/NF-kappaB signaling	biological_process	0.034651	0.37706
GO:0042063	gliogenesis	biological_process	0.036112	0.39243		GO:0070662	mast cell proliferation	biological_process	0.034682	0.37719
GO:0016114	terpenoid biosynthetic process	biological_process	0.036126	0.39243		GO:0071158	positive regulation of cell cycle arrest	biological_process	0.034716	0.37736
GO:0050771	negative regulation of axonogenesis	biological_process	0.036139	0.39243		GO:0051897	positive regulation of protein kinase B signaling	biological_process	0.034761	0.37766
GO:2000648	positive regulation of stem cell proliferation	biological_process	0.036221	0.39311		GO:0061614	pri-miRNA transcription from RNA polymerase II promoter	biological_process	0.03491	0.37908
GO:2000427	positive regulation of apoptotic cell clearance	biological_process	0.036242	0.39313		GO:2001251	negative regulation of chromosome organization	biological_process	0.034956	0.37923
GO:0035272	exocrine system development	biological_process	0.03633	0.39388		GO:0006290	pyrimidine dimer repair	biological_process	0.034961	0.37923
GO:0000159	protein phosphatase type 2A complex	cellular_component	0.036355	0.39394		GO:0019866	organelle inner membrane	cellular_component	0.035051	0.38001
GO:2001252	positive regulation of chromosome organization	biological_process	0.036502	0.39533		GO:0035087	siRNA loading onto RISC involved in RNA interference	biological_process	0.035084	0.38017
GO:0070613	regulation of protein processing	biological_process	0.036606	0.39625		GO:0071499	cellular response to laminar fluid shear stress	biological_process	0.03514	0.38057
GO:0051146	striated muscle cell differentiation	biological_process	0.036673	0.39676		GO:0000939	condensed chromosome inner kinetochore	cellular_component	0.035251	0.38158
GO:0032507	maintenance of protein location in cell	biological_process	0.036706	0.39691		GO:0031461	cullin-RING ubiquitin ligase complex	cellular_component	0.035277	0.38166
GO:0008584	male gonad development	biological_process	0.036829	0.39783		GO:0048617	embryonic foregut morphogenesis	biological_process	0.035373	0.38235
GO:0046546	development of primary male sexual characteristics	biological_process	0.036829	0.39783		GO:0009309	amine biosynthetic process	biological_process	0.035377	0.38235
GO:0051651	maintenance of location in cell	biological_process	0.03694	0.39882		GO:0035770	ribonucleoprotein granule	cellular_component	0.035429	0.38271
GO:0070937	CRD-mediated mRNA stability complex	cellular_component	0.036968	0.39891		GO:0001841	neural tube formation	biological_process	0.03562	0.38444
GO:0022037	metencephalon development	biological_process	0.037028	0.39918		GO:0045502	dynein binding	molecular_function	0.035631	0.38444
GO:0042910	xenobiotic transporter activity	molecular_function	0.037031	0.39918		GO:1903874	ferrous iron transmembrane transport	biological_process	0.035645	0.38444
GO:0000165	MAPK cascade	biological_process	0.037079	0.39931		GO:0000387	spliceosomal snRNP assembly	biological_process	0.035714	0.38475
GO:0031398	positive regulation of protein ubiquitination	biological_process	0.037082	0.39931		GO:0005720	nuclear heterochromatin	cellular_component	0.035717	0.38475
GO:0009240	isopentenyl diphosphate biosynthetic process	biological_process	0.037199	0.40002		GO:0003909	DNA ligase activity	molecular_function	0.03573	0.38475
GO:0019287	isopentenyl diphosphate biosynthetic process, mevalonate pathway	biological_process	0.037199	0.40002		GO:0009209	pyrimidine ribonucleoside triphosphate biosynthetic process	biological_process	0.03582	0.38552
GO:0008475	procollagen-lysine 5-dioxygenase activity	molecular_function	0.037206	0.40002		GO:0036337	Fas signaling pathway	biological_process	0.035887	0.38585
GO:0035728	response to hepatocyte growth factor	biological_process	0.037374	0.40141		GO:1902044	regulation of Fas signaling pathway	biological_process	0.035887	0.38585
GO:0035729	cellular response to hepatocyte growth factor stimulus	biological_process	0.037374	0.40141		GO:0060384	innervation	biological_process	0.035906	0.38585
GO:1901028	regulation of mitochondrial outer membrane permeabilization involved in apoptotic signaling pathway	biological_process	0.037407	0.40145		GO:0042493	response to drug	biological_process	0.035976	0.38638
GO:0004332	fructose-bisphosphate aldolase activity	molecular_function	0.037416	0.40145		GO:0009145	purine nucleoside triphosphate biosynthetic process	biological_process	0.035993	0.38638
GO:0046697	decidualization	biological_process	0.037446	0.40147		GO:0017056	structural constituent of nuclear pore	molecular_function	0.036012	0.38639
GO:0097050	type B pancreatic cell apoptotic process	biological_process	0.037456	0.40147		GO:0030662	coated vesicle membrane	cellular_component	0.036068	0.3866
GO:0090224	regulation of spindle organization	biological_process	0.037586	0.40248		GO:0048306	calcium-dependent protein binding	molecular_function	0.036069	0.3866
GO:0035195	gene silencing by miRNA	biological_process	0.037589	0.40248		GO:0005153	interleukin-8 receptor binding	molecular_function	0.03614	0.38717
GO:0010876	lipid localization	biological_process	0.037641	0.40283		GO:0038165	oncostatin-M-mediated signaling pathway	biological_process	0.036202	0.3876
GO:0005159	insulin-like growth factor receptor binding	molecular_function	0.037711	0.40337		GO:0000083	regulation of transcription involved in G1/S transition of mitotic cell cycle	biological_process	0.036219	0.3876
GO:0019210	kinase inhibitor activity	molecular_function	0.037976	0.406		GO:0050818	regulation of coagulation	biological_process	0.0363	0.38809
GO:0097129	cyclin D2-CDK4 complex	cellular_component	0.038107	0.40718		GO:0051798	positive regulation of hair follicle development	biological_process	0.036304	0.38809
GO:0044272	sulfur compound biosynthetic process	biological_process	0.038209	0.40802		GO:0010813	neuropeptide catabolic process	biological_process	0.036321	0.38809
GO:2001236	regulation of extrinsic apoptotic signaling pathway	biological_process	0.038224	0.40802		GO:0010812	negative regulation of cell-substrate adhesion	biological_process	0.03635	0.38821
GO:0055131	C3HC4-type RING finger domain binding	molecular_function	0.038264	0.40823		GO:0010712	regulation of collagen metabolic process	biological_process	0.036426	0.38881
GO:0048562	embryonic organ morphogenesis	biological_process	0.038405	0.40931		GO:0034141	positive regulation of toll-like receptor 3 signaling pathway	biological_process	0.036494	0.38935
GO:0050768	negative regulation of neurogenesis	biological_process	0.038418	0.40931		GO:0032844	regulation of homeostatic process	biological_process	0.03656	0.38963
GO:0043584	nose development	biological_process	0.038424	0.40931		GO:0015140	malate transmembrane transporter activity	molecular_function	0.036565	0.38963
GO:0051964	negative regulation of synapse assembly	biological_process	0.038519	0.41011		GO:0060872	semicircular canal development	biological_process	0.036577	0.38963
GO:0046985	positive regulation of hemoglobin biosynthetic process	biological_process	0.038557	0.4103		GO:1901213	regulation of transcription from RNA polymerase II promoter involved in heart development	biological_process	0.03662	0.38989
GO:0045736	negative regulation of cyclin-dependent protein serine/threonine kinase activity	biological_process	0.038666	0.41103		GO:0016580	Sin3 complex	cellular_component	0.036642	0.38992
GO:1904030	negative regulation of cyclin-dependent protein kinase activity	biological_process	0.038666	0.41103		GO:0008360	regulation of cell shape	biological_process	0.036679	0.39012
GO:0051044	positive regulation of membrane protein ectodomain proteolysis	biological_process	0.038691	0.41109		GO:0008443	phosphofructokinase activity	molecular_function	0.036785	0.39104
GO:0034046	poly(G) binding	molecular_function	0.03878	0.41166		GO:0008160	protein tyrosine phosphatase activator activity	molecular_function	0.036836	0.39139
GO:0001780	neutrophil homeostasis	biological_process	0.038785	0.41166		GO:0005102	receptor binding	molecular_function	0.036903	0.39176
GO:0010216	maintenance of DNA methylation	biological_process	0.03886	0.41225		GO:0002513	tolerance induction to self antigen	biological_process	0.036909	0.39176
GO:0072525	pyridine-containing compound biosynthetic process	biological_process	0.038906	0.41253		GO:0006412	translation	biological_process	0.036948	0.39197
GO:0032105	negative regulation of response to extracellular stimulus	biological_process	0.038969	0.41278		GO:0044440	endosomal part	cellular_component	0.036989	0.39221
GO:0032108	negative regulation of response to nutrient levels	biological_process	0.038969	0.41278		GO:0004797	thymidine kinase activity	molecular_function	0.03702	0.39233
GO:0043039	tRNA aminoacylation	biological_process	0.039033	0.41324		GO:0036109	alpha-linolenic acid metabolic process	biological_process	0.037063	0.39258
GO:0045239	tricarboxylic acid cycle enzyme complex	cellular_component	0.039134	0.4141		GO:0003950	NAD+ ADP-ribosyltransferase activity	molecular_function	0.037207	0.39356
GO:0010469	regulation of receptor activity	biological_process	0.039215	0.41475		GO:0000796	condensin complex	cellular_component	0.037217	0.39356
GO:0006471	protein ADP-ribosylation	biological_process	0.039267	0.41509		GO:0005487	nucleocytoplasmic transporter activity	molecular_function	0.037222	0.39356
GO:0030510	regulation of BMP signaling pathway	biological_process	0.039307	0.41529		GO:0071371	cellular response to gonadotropin stimulus	biological_process	0.037231	0.39356
GO:0051393	alpha-actinin binding	molecular_function	0.039395	0.41601		GO:1904152	regulation of retrograde protein transport, ER to cytosol	biological_process	0.037271	0.39363
GO:0010324	membrane invagination	biological_process	0.039428	0.41615		GO:0006517	protein deglycosylation	biological_process	0.037276	0.39363
GO:0031118	rRNA pseudouridine synthesis	biological_process	0.03954	0.41628		GO:0072686	mitotic spindle	cellular_component	0.037328	0.39368
GO:0031429	box H/ACA snoRNP complex	cellular_component	0.03954	0.41628		GO:0007015	actin filament organization	biological_process	0.037329	0.39368
GO:0034513	box H/ACA snoRNA binding	molecular_function	0.03954	0.41628		GO:0009220	pyrimidine ribonucleotide biosynthetic process	biological_process	0.037337	0.39368
GO:0072588	box H/ACA RNP complex	cellular_component	0.03954	0.41628		GO:0051881	regulation of mitochondrial membrane potential	biological_process	0.037451	0.39468
GO:0072589	box H/ACA scaRNP complex	cellular_component	0.03954	0.41628		GO:0009142	nucleoside triphosphate biosynthetic process	biological_process	0.037495	0.39494
GO:0031414	N-terminal protein acetyltransferase complex	cellular_component	0.039661	0.41722		GO:0000460	maturation of 5.8S rRNA	biological_process	0.037547	0.39516
GO:2000676	positive regulation of type B pancreatic cell apoptotic process	biological_process	0.03967	0.41722		GO:1903650	negative regulation of cytoplasmic transport	biological_process	0.037553	0.39516
GO:0008195	phosphatidate phosphatase activity	molecular_function	0.039816	0.41854		GO:0090317	negative regulation of intracellular protein transport	biological_process	0.037613	0.39524
GO:0043124	negative regulation of I-kappaB kinase/NF-kappaB signaling	biological_process	0.039924	0.41947		GO:0010746	regulation of plasma membrane long-chain fatty acid transport	biological_process	0.037619	0.39524
GO:0018105	peptidyl-serine phosphorylation	biological_process	0.03999	0.41994		GO:0010748	negative regulation of plasma membrane long-chain fatty acid transport	biological_process	0.037619	0.39524
GO:0009445	putrescine metabolic process	biological_process	0.040239	0.42234		GO:0036312	phosphatidylinositol 3-kinase regulatory subunit binding	molecular_function	0.037681	0.39561
GO:0010907	positive regulation of glucose metabolic process	biological_process	0.040383	0.42364		GO:0006990	positive regulation of transcription from RNA polymerase II promoter involved in unfolded protein response	biological_process	0.037691	0.39561
GO:0071871	response to epinephrine	biological_process	0.040512	0.42478		GO:0034418	urate biosynthetic process	biological_process	0.037748	0.396
GO:0045120	pronucleus	cellular_component	0.040698	0.42651		GO:0036464	cytoplasmic ribonucleoprotein granule	cellular_component	0.037859	0.39663
GO:1903317	regulation of protein maturation	biological_process	0.040838	0.42777		GO:1903573	negative regulation of response to endoplasmic reticulum stress	biological_process	0.037886	0.39663
GO:0097009	energy homeostasis	biological_process	0.040864	0.42783		GO:0043407	negative regulation of MAP kinase activity	biological_process	0.037892	0.39663
GO:0002178	palmitoyltransferase complex	cellular_component	0.040896	0.42794		GO:1900151	regulation of nuclear-transcribed mRNA catabolic process, deadenylation-dependent decay	biological_process	0.037906	0.39663
GO:0003872	6-phosphofructokinase activity	molecular_function	0.041089	0.42975		GO:1900153	positive regulation of nuclear-transcribed mRNA catabolic process, deadenylation-dependent decay	biological_process	0.037906	0.39663
GO:0002082	regulation of oxidative phosphorylation	biological_process	0.041131	0.42997		GO:0001503	ossification	biological_process	0.037922	0.39663
GO:0006297	nucleotide-excision repair, DNA gap filling	biological_process	0.041186	0.43032		GO:0009991	response to extracellular stimulus	biological_process	0.037977	0.39675
GO:0045778	positive regulation of ossification	biological_process	0.041259	0.43087		GO:0009148	pyrimidine nucleoside triphosphate biosynthetic process	biological_process	0.037979	0.39675
GO:0043325	phosphatidylinositol-3,4-bisphosphate binding	molecular_function	0.041379	0.43191		GO:0010735	positive regulation of transcription via serum response element binding	biological_process	0.037991	0.39675
GO:0072593	reactive oxygen species metabolic process	biological_process	0.041445	0.43238		GO:0004727	prenylated protein tyrosine phosphatase activity	molecular_function	0.038094	0.39735
GO:0015091	ferric iron transmembrane transporter activity	molecular_function	0.04149	0.43241		GO:0012506	vesicle membrane	cellular_component	0.038116	0.39735
GO:0072510	trivalent inorganic cation transmembrane transporter activity	molecular_function	0.04149	0.43241		GO:0050689	negative regulation of defense response to virus by host	biological_process	0.038123	0.39735
GO:0035793	positive regulation of metanephric mesenchymal cell migration by platelet-derived growth factor receptor-beta signaling pathway	biological_process	0.041573	0.43252		GO:0051050	positive regulation of transport	biological_process	0.038125	0.39735
GO:1900238	regulation of metanephric mesenchymal cell migration by platelet-derived growth factor receptor-beta signaling pathway	biological_process	0.041573	0.43252		GO:0006749	glutathione metabolic process	biological_process	0.038162	0.39753
GO:2000591	positive regulation of metanephric mesenchymal cell migration	biological_process	0.041573	0.43252		GO:0043409	negative regulation of MAPK cascade	biological_process	0.038199	0.39771
GO:2000973	regulation of pro-B cell differentiation	biological_process	0.041584	0.43252		GO:0015817	histidine transport	biological_process	0.038263	0.39779
GO:1901615	organic hydroxy compound metabolic process	biological_process	0.041699	0.43308		GO:0089709	L-histidine transmembrane transport	biological_process	0.038263	0.39779
GO:0005778	peroxisomal membrane	cellular_component	0.0417	0.43308		GO:1902024	L-histidine transport	biological_process	0.038263	0.39779
GO:0031903	microbody membrane	cellular_component	0.0417	0.43308		GO:0045583	regulation of cytotoxic T cell differentiation	biological_process	0.038314	0.39791
GO:0010464	regulation of mesenchymal cell proliferation	biological_process	0.041744	0.43332		GO:0045585	positive regulation of cytotoxic T cell differentiation	biological_process	0.038314	0.39791
[truncated: 12,230 more rows]
