# Supplementary material for: The Specific Inhibition of SOD1 Selectively Promotes Apoptosis of Cancer Cells via Regulation of the ROS Signaling Network
Source: Oxid Med Cell Longev. 2019 Feb 18;2019:9706792. doi: 10.1155/2019/9706792 (PMC6398008; doi:10.1155/2019/9706792)
Supplement: Supplementary Materials — Figure S1: the levels of SOD1 in SOD1 knockdown HeLa cells and key DEGs in LD100-treated HeLa cells. Figure S2: SOD1 activity and H2O2 and O2 •− levels within LD100-treated DU145 and RWPE-1 cells. Figure S3: successful construction of mRNA sequencing in LD100-treated DU145 and RWPE-1 cells. Figure S4: many key genes in representative signaling pathways are selectively regulated upon the specific SOD1 inhibition. Figure S5: the specific SOD1 inhibition selectively regulates cancer pathways in cancer cells. Figure S6: many key genes in the cell cycle and p53 and apoptosis signaling pathways are selectively regulated upon the specific SOD1 inhibition. Figure S7: the specific SOD1 inhibition selectively activates the p53 signaling pathway in cancer cells. Figure S8: specific SOD1 inhibition represses the crosstalk of ERK, PI3K, and NF-κB signaling pathways in cancer cells. Figure S9: the specific SOD1 inhibition increases the intracellular peroxynitrite content. Figure S10: the specific SOD1 inhibition does not affect the growth and proliferation of normal cells. Table S1: quality evaluation of transcriptome library in HeLa cells. Table S2: GO classification of DEGs in LD100-treated and SOD1 knockdown HeLa cells. Table S3: KEGG pathway enrichment of DEGs in LD100-treated and SOD1 knockdown HeLa cells. Table S4: quality evaluation of transcriptome library in DU145 and RWPE-1 cells. Table S5: GO classification of DEGs in LD100-treated DU145 and RWPE-1 cells. Table S6: KEGG pathway enrichment of DEGs in LD100-treated DU145 and RWPE-1 cells. [file 9706792.f1.zip › Table S3.xls]

## Sheet: Sheet1
KEGG pathway enrichment of DEGs in LD100 treated HeLa cells					KEGG pathway enrichment of DEGs in SOD1 knockdown HeLa cells
Description	ID	p-Value	q-Value		Description	ID	p-Value	q-Value
Glycolysis / Gluconeogenesis	hsa00010	0.000152434	0.041767		Cell cycle	hsa04110	0.00029681	0.0470732
Pathways in cancer	hsa05200	0.00129786	0.158993		Pathways in cancer	hsa05200	0.000337442	0.0470732
Prostate cancer	hsa05215	0.00177913	0.158993		ECM-receptor interaction	hsa04512	0.00228464	0.164771
Proteoglycans in cancer	hsa05205	0.00280378	0.158993		DNA replication	hsa03030	0.00236232	0.164771
HIF-1 signaling pathway	hsa04066	0.00290134	0.158993		Hepatitis B	hsa05161	0.00324985	0.16519
HTLV-I infection	hsa05166	0.00507473	0.217597		Spliceosome	hsa03040	0.00411766	0.16519
Hippo signaling pathway	hsa04390	0.00555903	0.217597		Proteoglycans in cancer	hsa05205	0.00414455	0.16519
Endometrial cancer	hsa05213	0.0074962	0.238474		Pyrimidine metabolism	hsa00240	0.00639028	0.222861
Fructose and mannose metabolism	hsa00051	0.00783309	0.238474		Small cell lung cancer	hsa05222	0.00851935	0.2641
Renal cell carcinoma	hsa05211	0.0088279	0.241884		p53 signaling pathway	hsa04115	0.0205463	0.507651
Basal cell carcinoma	hsa05217	0.0117343	0.292291		HTLV-I infection	hsa05166	0.0224403	0.507651
Carbon metabolism	hsa01200	0.0131801	0.300945		Notch signaling pathway	hsa04330	0.023541	0.507651
Melanoma	hsa05218	0.0166204	0.350307		RNA transport	hsa03013	0.023654	0.507651
p53 signaling pathway	hsa04115	0.0199774	0.390987		Prostate cancer	hsa05215	0.0286821	0.519207
Biosynthesis of amino acids	hsa01230	0.023406	0.411505		Base excision repair	hsa03410	0.0321282	0.519207
Glioma	hsa05214	0.0240295	0.411505		Nucleotide excision repair	hsa03420	0.0339058	0.519207
Colorectal cancer	hsa05210	0.0289257	0.465983		Colorectal cancer	hsa05210	0.0374934	0.519207
DNA replication	hsa03030	0.0322443	0.465983		Chronic myeloid leukemia	hsa05220	0.0376593	0.519207
Insulin signaling pathway	hsa04910	0.0326417	0.465983		Pancreatic cancer	hsa05212	0.0391582	0.519207
Signaling pathways regulating pluripotency of stem cells	hsa04550	0.0351295	0.465983		Hippo signaling pathway	hsa04390	0.0398171	0.519207
Dorso-ventral axis formation	hsa04320	0.035714	0.465983		Circadian rhythm	hsa04710	0.0405521	0.519207
FoxO signaling pathway	hsa04068	0.0409956	0.472061		Bladder cancer	hsa05219	0.0418639	0.519207
Non-small cell lung cancer	hsa05223	0.042023	0.472061		Focal adhesion	hsa04510	0.043375	0.519207
Bladder cancer	hsa05219	0.0430748	0.472061		Melanogenesis	hsa04916	0.0446928	0.519207
Inositol phosphate metabolism	hsa00562	0.0435557	0.472061		Protein processing in endoplasmic reticulum	hsa04141	0.046524	0.519207
TNF signaling pathway	hsa04668	0.0447941	0.472061		Endocytosis	hsa04144	0.0490911	0.526785
Melanogenesis	hsa04916	0.0484656	0.491836		Sphingolipid metabolism	hsa00600	0.0551796	0.558408
Adherens junction	hsa04520	0.0555548	0.509621		Estrogen signaling pathway	hsa04915	0.0577426	0.558408
Chronic myeloid leukemia	hsa05220	0.0555548	0.509621		Mismatch repair	hsa03430	0.0580424	0.558408
Circadian rhythm	hsa04710	0.055949	0.509621		Arrhythmogenic right ventricular cardiomyopathy (ARVC)	hsa05412	0.062388	0.566455
Focal adhesion	hsa04510	0.0576578	0.509621		Folate biosynthesis	hsa00790	0.0668555	0.566455
AMPK signaling pathway	hsa04152	0.0597621	0.511713		TNF signaling pathway	hsa04668	0.0694136	0.566455
Mismatch repair	hsa03430	0.0621421	0.515968		FoxO signaling pathway	hsa04068	0.0706029	0.566455
Neurotrophin signaling pathway	hsa04722	0.0646578	0.521066		Signaling pathways regulating pluripotency of stem cells	hsa04550	0.0706271	0.566455
Oxytocin signaling pathway	hsa04921	0.0759911	0.594902		Hypertrophic cardiomyopathy (HCM)	hsa05410	0.0710607	0.566455
Regulation of actin cytoskeleton	hsa04810	0.08682	0.635686		PI3K-Akt signaling pathway	hsa04151	0.080936	0.627254
Aldosterone-regulated sodium reabsorption	hsa04960	0.0873834	0.635686		Basal cell carcinoma	hsa05217	0.0916695	0.668911
Terpenoid backbone biosynthesis	hsa00900	0.0904992	0.635686		Legionellosis	hsa05134	0.0916695	0.668911
Alanine, aspartate and glutamate metabolism	hsa00250	0.0949066	0.635686		Huntington's disease	hsa05016	0.0935037	0.668911
Nitrogen metabolism	hsa00910	0.0956007	0.635686		Viral carcinogenesis	hsa05203	0.106064	0.739794
Estrogen signaling pathway	hsa04915	0.0965218	0.635686		Glioma	hsa05214	0.115089	0.764686
Pyruvate metabolism	hsa00620	0.0978455	0.635686		Adherens junction	hsa04520	0.116719	0.764686
Axon guidance	hsa04360	0.101891	0.635686		Other types of O-glycan biosynthesis	hsa00514	0.117855	0.764686
Endocytosis	hsa04144	0.102081	0.635686		RNA degradation	hsa03018	0.126995	0.805266
Small cell lung cancer	hsa05222	0.10734	0.636503		AMPK signaling pathway	hsa04152	0.140355	0.854191
Pancreatic cancer	hsa05212	0.111079	0.636503		Insulin signaling pathway	hsa04910	0.144314	0.854191
Arginine and proline metabolism	hsa00330	0.111504	0.636503		Ubiquitin mediated proteolysis	hsa04120	0.145547	0.854191
VEGF signaling pathway	hsa04370	0.111504	0.636503		Thyroid cancer	hsa05216	0.146958	0.854191
B cell receptor signaling pathway	hsa04662	0.119376	0.643132		N-Glycan biosynthesis	hsa00510	0.16033	0.912897
Spliceosome	hsa03040	0.121405	0.643132		Thyroid hormone signaling pathway	hsa04919	0.171014	0.954258
Acute myeloid leukemia	hsa05221	0.121852	0.643132		mRNA surveillance pathway	hsa03015	0.181887	0.995028
Hedgehog signaling pathway	hsa04340	0.122054	0.643132		Galactose metabolism	hsa00052	0.186745	1
Nicotinate and nicotinamide metabolism	hsa00760	0.127075	0.644788		Glycosaminoglycan biosynthesis - chondroitin sulfate / dermatan sulfate	hsa00532	0.196801	1
Pentose phosphate pathway	hsa00030	0.127075	0.644788		Non-small cell lung cancer	hsa05223	0.20808	1
Base excision repair	hsa03410	0.130505	0.650152		Transcriptional misregulation in cancer	hsa05202	0.219733	1
Type II diabetes mellitus	hsa04930	0.133691	0.654129		MAPK signaling pathway	hsa04010	0.22189	1
Thyroid cancer	hsa05216	0.143155	0.688147		Dilated cardiomyopathy	hsa05414	0.222136	1
mTOR signaling pathway	hsa04150	0.155672	0.726736		Vasopressin-regulated water reabsorption	hsa04962	0.22934	1
Phosphatidylinositol signaling system	hsa04070	0.156487	0.726736		Purine metabolism	hsa00230	0.232345	1
Hepatitis B	hsa05161	0.159341	0.727656		Fc gamma R-mediated phagocytosis	hsa04666	0.235855	1
Morphine addiction	hsa05032	0.170315	0.762496		Renal cell carcinoma	hsa05211	0.237428	1
Prolactin signaling pathway	hsa04917	0.17386	0.762496		ErbB signaling pathway	hsa04012	0.238798	1
Purine metabolism	hsa00230	0.177847	0.762496		SNARE interactions in vesicular transport	hsa04130	0.254121	1
Galactose metabolism	hsa00052	0.178101	0.762496		Oocyte meiosis	hsa04114	0.263307	1
Gap junction	hsa04540	0.184853	0.779227		Glycosaminoglycan biosynthesis - keratan sulfate	hsa00533	0.281219	1
RNA degradation	hsa03018	0.198133	0.822553		Endometrial cancer	hsa05213	0.286674	1
Protein processing in endoplasmic reticulum	hsa04141	0.202951	0.824866		NOD-like receptor signaling pathway	hsa04621	0.302327	1
Fc gamma R-mediated phagocytosis	hsa04666	0.207371	0.824866		Adipocytokine signaling pathway	hsa04920	0.306432	1
Cell cycle	hsa04110	0.207722	0.824866		RNA polymerase	hsa03020	0.306968	1
N-Glycan biosynthesis	hsa00510	0.222188	0.864296		Fructose and mannose metabolism	hsa00051	0.306968	1
ErbB signaling pathway	hsa04012	0.224914	0.864296		Fanconi anemia pathway	hsa03460	0.307181	1
Proteasome	hsa03050	0.227114	0.864296		Nicotinate and nicotinamide metabolism	hsa00760	0.310819	1
cGMP-PKG signaling pathway	hsa04022	0.243904	0.915476		Homologous recombination	hsa03440	0.310819	1
PI3K-Akt signaling pathway	hsa04151	0.258377	0.949198		Glutathione metabolism	hsa00480	0.312189	1
Butirosin and neomycin biosynthesis	hsa00524	0.259817	0.949198		Dorso-ventral axis formation	hsa04320	0.314362	1
Ubiquinone and other terpenoid-quinone biosynthesis	hsa00130	0.276066	0.995289		Axon guidance	hsa04360	0.317569	1
Amino sugar and nucleotide sugar metabolism	hsa00520	0.282084	0.999996		Riboflavin metabolism	hsa00740	0.318889	1
T cell receptor signaling pathway	hsa04660	0.299345	0.999996		Epstein-Barr virus infection	hsa05169	0.321296	1
Notch signaling pathway	hsa04330	0.301212	0.999996		TGF-beta signaling pathway	hsa04350	0.330908	1
Epstein-Barr virus infection	hsa05169	0.303323	0.999996		Neurotrophin signaling pathway	hsa04722	0.342069	1
Vibrio cholerae infection	hsa05110	0.30982	0.999996		Phosphatidylinositol signaling system	hsa04070	0.348362	1
Vitamin B6 metabolism	hsa00750	0.315946	0.999996		Biosynthesis of unsaturated fatty acids	hsa01040	0.351766	1
Legionellosis	hsa05134	0.328334	0.999996		Lysine degradation	hsa00310	0.356226	1
Rap1 signaling pathway	hsa04015	0.333478	0.999996		Apoptosis	hsa04210	0.359281	1
Riboflavin metabolism	hsa00740	0.358683	0.999996		Amino sugar and nucleotide sugar metabolism	hsa00520	0.363579	1
Ovarian steroidogenesis	hsa04913	0.360233	0.999996		Regulation of actin cytoskeleton	hsa04810	0.366192	1
Tryptophan metabolism	hsa00380	0.367738	0.999996		Synthesis and degradation of ketone bodies	hsa00072	0.367077	1
Apoptosis	hsa04210	0.369442	0.999996		Alcoholism	hsa05034	0.373971	1
Vascular smooth muscle contraction	hsa04270	0.371035	0.999996		cGMP-PKG signaling pathway	hsa04022	0.378567	1
GnRH signaling pathway	hsa04912	0.37252	0.999996		Inositol phosphate metabolism	hsa00562	0.384012	1
Other glycan degradation	hsa00511	0.379793	0.999996		Arginine and proline metabolism	hsa00330	0.384012	1
ECM-receptor interaction	hsa04512	0.384966	0.999996		Glycerophospholipid metabolism	hsa00564	0.386585	1
Wnt signaling pathway	hsa04310	0.389069	0.999996		Antigen processing and presentation	hsa04612	0.391395	1
Porphyrin and chlorophyll metabolism	hsa00860	0.390484	0.999996		Acute myeloid leukemia	hsa05221	0.392334	1
Vitamin digestion and absorption	hsa04977	0.392767	0.999996		ABC transporters	hsa02010	0.396063	1
Viral carcinogenesis	hsa05203	0.400477	0.999996		Ribosome biogenesis in eukaryotes	hsa03008	0.401738	1
Citrate cycle (TCA cycle)	hsa00020	0.401679	0.999996		Glycine, serine and threonine metabolism	hsa00260	0.405775	1
Metabolic pathways	hsa01100	0.405485	0.999996		Protein digestion and absorption	hsa04974	0.41151	1
Ribosome biogenesis in eukaryotes	hsa03008	0.430609	0.999996		Prion diseases	hsa05020	0.416331	1
Ether lipid metabolism	hsa00565	0.43601	0.999996		Long-term potentiation	hsa04720	0.416537	1
Glycerolipid metabolism	hsa00561	0.440662	0.999996		Fatty acid elongation	hsa00062	0.421133	1
Antigen processing and presentation	hsa04612	0.445965	0.999996		Vibrio cholerae infection	hsa05110	0.423815	1
Glycosaminoglycan biosynthesis - chondroitin sulfate / dermatan sulfate	hsa00532	0.44742	0.999996		Synaptic vesicle cycle	hsa04721	0.425885	1
mRNA surveillance pathway	hsa03015	0.447562	0.999996		Peroxisome	hsa04146	0.428368	1
RNA transport	hsa03013	0.451492	0.999996		GABAergic synapse	hsa04727	0.429084	1
ABC transporters	hsa02010	0.458642	0.999996		Glycosaminoglycan degradation	hsa00531	0.434783	1
Epithelial cell signaling in Helicobacter pylori infection	hsa05120	0.461975	0.999996		Wnt signaling pathway	hsa04310	0.437093	1
Progesterone-mediated oocyte maturation	hsa04914	0.463011	0.999996		Dopaminergic synapse	hsa04728	0.437403	1
Oocyte meiosis	hsa04114	0.463545	0.999996		Cholinergic synapse	hsa04725	0.437846	1
Natural killer cell mediated cytotoxicity	hsa04650	0.463569	0.999996		Pentose phosphate pathway	hsa00030	0.440854	1
Synthesis and degradation of ketone bodies	hsa00072	0.474941	0.999996		Pathogenic Escherichia coli infection	hsa05130	0.446445	1
Carbohydrate digestion and absorption	hsa04973	0.481093	0.999996		Complement and coagulation cascades	hsa04610	0.457087	1
Vasopressin-regulated water reabsorption	hsa04962	0.481093	0.999996		Mineral absorption	hsa04978	0.457855	1
MAPK signaling pathway	hsa04010	0.489427	0.999996		Ovarian steroidogenesis	hsa04913	0.457855	1
Bacterial invasion of epithelial cells	hsa05100	0.497058	0.999996		Biosynthesis of amino acids	hsa01230	0.466603	1
Fc epsilon RI signaling pathway	hsa04664	0.498092	0.999996		HIF-1 signaling pathway	hsa04066	0.470779	1
Ras signaling pathway	hsa04014	0.502011	0.999996		Steroid biosynthesis	hsa00100	0.472617	1
Osteoclast differentiation	hsa04380	0.503216	0.999996		Ether lipid metabolism	hsa00565	0.483635	1
Platelet activation	hsa04611	0.503216	0.999996		Melanoma	hsa05218	0.49738	1
Thyroid hormone signaling pathway	hsa04919	0.505167	0.999996		Bacterial invasion of epithelial cells	hsa05100	0.505555	1
Homologous recombination	hsa03440	0.509478	0.999996		Alzheimer's disease	hsa05010	0.508374	1
Sulfur metabolism	hsa00920	0.522853	0.999996		Alanine, aspartate and glutamate metabolism	hsa00250	0.514877	1
Non-alcoholic fatty liver disease (NAFLD)	hsa04932	0.525132	0.999996		Thyroid hormone synthesis	hsa04918	0.517306	1
Nucleotide excision repair	hsa03420	0.525204	0.999996		B cell receptor signaling pathway	hsa04662	0.517306	1
Sphingolipid metabolism	hsa00600	0.525204	0.999996		Malaria	hsa05144	0.518773	1
Viral myocarditis	hsa05416	0.539314	0.999996		Epithelial cell signaling in Helicobacter pylori infection	hsa05120	0.529764	1
NF-kappa B signaling pathway	hsa04064	0.542641	0.999996		Jak-STAT signaling pathway	hsa04630	0.532409	1
Histidine metabolism	hsa00340	0.543748	0.999996		Nitrogen metabolism	hsa00910	0.534266	1
Protein export	hsa03060	0.543748	0.999996		2-Oxocarboxylic acid metabolism	hsa01210	0.534266	1
Selenocompound metabolism	hsa00450	0.552892	0.999996		Pantothenate and CoA biosynthesis	hsa00770	0.534266	1
Prion diseases	hsa05020	0.557187	0.999996		Glycerolipid metabolism	hsa00561	0.550155	1
Glycerophospholipid metabolism	hsa00564	0.558142	0.999996		Taurine and hypotaurine metabolism	hsa00430	0.55797	1
Shigellosis	hsa05131	0.558343	0.999996		Herpes simplex infection	hsa05168	0.560836	1
Pathogenic Escherichia coli infection	hsa05130	0.562761	0.999996		Morphine addiction	hsa05032	0.56219	1
beta-Alanine metabolism	hsa00410	0.56438	0.999996		Amyotrophic lateral sclerosis (ALS)	hsa05014	0.565917	1
Glutathione metabolism	hsa00480	0.56789	0.999996		Non-homologous end-joining	hsa03450	0.566278	1
Phenylalanine metabolism	hsa00360	0.587447	0.999996		Fatty acid biosynthesis	hsa00061	0.566278	1
Cholinergic synapse	hsa04725	0.592123	0.999996		Oxytocin signaling pathway	hsa04921	0.572382	1
Caffeine metabolism	hsa00232	0.599759	0.999996		Other glycan degradation	hsa00511	0.573497	1
NOD-like receptor signaling pathway	hsa04621	0.601594	0.999996		Lysosome	hsa04142	0.577364	1
Adipocytokine signaling pathway	hsa04920	0.607252	0.999996		Proximal tubule bicarbonate reclamation	hsa04964	0.580025	1
Hepatitis C	hsa05160	0.608268	0.999996		Amoebiasis	hsa05146	0.593854	1
Huntington's disease	hsa05016	0.60867	0.999996		Hepatitis C	hsa05160	0.600834	1
Type I diabetes mellitus	hsa04940	0.617262	0.999996		Progesterone-mediated oocyte maturation	hsa04914	0.603992	1
Glycosaminoglycan degradation	hsa00531	0.620235	0.999996		Prolactin signaling pathway	hsa04917	0.60861	1
GABAergic synapse	hsa04727	0.622921	0.999996		Glycosphingolipid biosynthesis - globo series	hsa00603	0.609794	1
Lysosome	hsa04142	0.628092	0.999996		Vitamin digestion and absorption	hsa04977	0.613127	1
Thyroid hormone synthesis	hsa04918	0.640698	0.999996		Tight junction	hsa04530	0.614844	1
Chagas disease (American trypanosomiasis)	hsa05142	0.641381	0.999996		Measles	hsa05162	0.614844	1
Non-homologous end-joining	hsa03450	0.648033	0.999996		Carbon metabolism	hsa01200	0.620792	1
Fatty acid biosynthesis	hsa00061	0.648033	0.999996		Influenza A	hsa05164	0.622038	1
Aminoacyl-tRNA biosynthesis	hsa00970	0.648071	0.999996		Amphetamine addiction	hsa05031	0.623523	1
Steroid biosynthesis	hsa00100	0.651196	0.999996		GnRH signaling pathway	hsa04912	0.625184	1
Parkinson's disease	hsa05012	0.652631	0.999996		Valine, leucine and isoleucine degradation	hsa00280	0.626039	1
cAMP signaling pathway	hsa04024	0.65426	0.999996		Glutamatergic synapse	hsa04724	0.628359	1
Inflammatory mediator regulation of TRP channels	hsa04750	0.660352	0.999996		Circadian entrainment	hsa04713	0.628965	1
TGF-beta signaling pathway	hsa04350	0.665052	0.999996		Citrate cycle (TCA cycle)	hsa00020	0.644839	1
Arrhythmogenic right ventricular cardiomyopathy (ARVC)	hsa05412	0.672563	0.999996		One carbon pool by folate	hsa00670	0.645986	1
MicroRNAs in cancer	hsa05206	0.677287	0.999996		Glycosphingolipid biosynthesis - ganglio series	hsa00604	0.650279	1
Amphetamine addiction	hsa05031	0.680973	0.999996		mTOR signaling pathway	hsa04150	0.656196	1
Propanoate metabolism	hsa00640	0.682239	0.999996		RIG-I-like receptor signaling pathway	hsa04622	0.661062	1
Folate biosynthesis	hsa00790	0.683519	0.999996		Ubiquinone and other terpenoid-quinone biosynthesis	hsa00130	0.661322	1
Tyrosine metabolism	hsa00350	0.686153	0.999996		Sulfur metabolism	hsa00920	0.661322	1
Starch and sucrose metabolism	hsa00500	0.701377	0.999996		Chagas disease (American trypanosomiasis)	hsa05142	0.663285	1
Hypertrophic cardiomyopathy (HCM)	hsa05410	0.708534	0.999996		Drug metabolism - other enzymes	hsa00983	0.671946	1
Graft-versus-host disease	hsa05332	0.710389	0.999996		Glycosphingolipid biosynthesis - lacto and neolacto series	hsa00601	0.674502	1
Glutamatergic synapse	hsa04724	0.711952	0.999996		Butanoate metabolism	hsa00650	0.674502	1
Phagosome	hsa04145	0.713423	0.999996		Glycolysis / Gluconeogenesis	hsa00010	0.677303	1
Cocaine addiction	hsa05030	0.714029	0.999996		Hedgehog signaling pathway	hsa04340	0.693506	1
Dilated cardiomyopathy	hsa05414	0.714148	0.999996		Fatty acid metabolism	hsa01212	0.693585	1
Adrenergic signaling in cardiomyocytes	hsa04261	0.718104	0.999996		Caffeine metabolism	hsa00232	0.694077	1
Jak-STAT signaling pathway	hsa04630	0.723476	0.999996		Butirosin and neomycin biosynthesis	hsa00524	0.694077	1
Valine, leucine and isoleucine degradation	hsa00280	0.728993	0.999996		Cyanoamino acid metabolism	hsa00460	0.694077	1
Amyotrophic lateral sclerosis (ALS)	hsa05014	0.731248	0.999996		Hematopoietic cell lineage	hsa04640	0.715722	1
Proximal tubule bicarbonate reclamation	hsa04964	0.733008	0.999996		Selenocompound metabolism	hsa00450	0.721964	1
Bile secretion	hsa04976	0.740946	0.999996		Renin-angiotensin system	hsa04614	0.721964	1
Taurine and hypotaurine metabolism	hsa00430	0.746809	0.999996		PPAR signaling pathway	hsa03320	0.729691	1
Cysteine and methionine metabolism	hsa00270	0.747096	0.999996		Rap1 signaling pathway	hsa04015	0.73177	1
Insulin secretion	hsa04911	0.748327	0.999996		Protein export	hsa03060	0.738394	1
Other types of O-glycan biosynthesis	hsa00514	0.749756	0.999996		Pertussis	hsa05133	0.745236	1
Toxoplasmosis	hsa05145	0.756534	0.999996		African trypanosomiasis	hsa05143	0.746049	1
Glycosaminoglycan biosynthesis - heparan sulfate / heparin	hsa00534	0.756666	0.999996		Long-term depression	hsa04730	0.748292	1
Fanconi anemia pathway	hsa03460	0.763489	0.999996		Vitamin B6 metabolism	hsa00750	0.748887	1
Allograft rejection	hsa05330	0.765338	0.999996		Cocaine addiction	hsa05030	0.752936	1
Metabolism of xenobiotics by cytochrome P450	hsa00980	0.767901	0.999996		Phenylalanine metabolism	hsa00360	0.753248	1
RNA polymerase	hsa03020	0.769647	0.999996		Ras signaling pathway	hsa04014	0.754677	1
Glycosylphosphatidylinositol(GPI)-anchor biosynthesis	hsa00563	0.778599	0.999996		NF-kappa B signaling pathway	hsa04064	0.758662	1
Amoebiasis	hsa05146	0.78104	0.999996		Metabolic pathways	hsa01100	0.758761	1
Glycine, serine and threonine metabolism	hsa00260	0.782563	0.999996		Pyruvate metabolism	hsa00620	0.761313	1
Ubiquitin mediated proteolysis	hsa04120	0.792639	0.999996		cAMP signaling pathway	hsa04024	0.764786	1
Butanoate metabolism	hsa00650	0.798876	0.999996		Glycosaminoglycan biosynthesis - heparan sulfate / heparin	hsa00534	0.764789	1
Leukocyte transendothelial migration	hsa04670	0.803288	0.999996		Shigellosis	hsa05131	0.764899	1
Pyrimidine metabolism	hsa00240	0.808992	0.999996		Tyrosine metabolism	hsa00350	0.767778	1
Sulfur relay system	hsa04122	0.813426	0.999996		Steroid hormone biosynthesis	hsa00140	0.783851	1
Oxidative phosphorylation	hsa00190	0.816387	0.999996		Primary immunodeficiency	hsa05340	0.78809	1
Retinol metabolism	hsa00830	0.817208	0.999996		alpha-Linolenic acid metabolism	hsa00592	0.789055	1
Tight junction	hsa04530	0.824705	0.999996		Adrenergic signaling in cardiomyocytes	hsa04261	0.793971	1
Measles	hsa05162	0.824705	0.999996		Inflammatory mediator regulation of TRP channels	hsa04750	0.796059	1
Salmonella infection	hsa05132	0.826173	0.999996		Gap junction	hsa04540	0.798348	1
Mineral absorption	hsa04978	0.835629	0.999996		Toxoplasmosis	hsa05145	0.804468	1
Lysine degradation	hsa00310	0.835629	0.999996		Endocrine and other factor-regulated calcium reabsorption	hsa04961	0.80923	1
Chemical carcinogenesis	hsa05204	0.836659	0.999996		Cytosolic DNA-sensing pathway	hsa04623	0.810074	1
One carbon pool by folate	hsa00670	0.838942	0.999996		Vascular smooth muscle contraction	hsa04270	0.814733	1
Long-term depression	hsa04730	0.854003	0.999996		Pancreatic secretion	hsa04972	0.820174	1
Biosynthesis of unsaturated fatty acids	hsa01040	0.856823	0.999996		Insulin secretion	hsa04911	0.82399	1
Herpes simplex infection	hsa05168	0.85707	0.999996		Salmonella infection	hsa05132	0.82399	1
Alzheimer's disease	hsa05010	0.871596	0.999996		Terpenoid backbone biosynthesis	hsa00900	0.830294	1
Regulation of autophagy	hsa04140	0.875922	0.999996		Collecting duct acid secretion	hsa04966	0.831534	1
Mucin type O-Glycan biosynthesis	hsa00512	0.878196	0.999996		VEGF signaling pathway	hsa04370	0.840957	1
Fatty acid elongation	hsa00062	0.887244	0.999996		Calcium signaling pathway	hsa04020	0.844958	1
Glycosphingolipid biosynthesis - globo series	hsa00603	0.898695	0.999996		Starch and sucrose metabolism	hsa00500	0.84635	1
Peroxisome	hsa04146	0.905525	0.999996		Non-alcoholic fatty liver disease (NAFLD)	hsa04932	0.855181	1
Chemokine signaling pathway	hsa04062	0.908405	0.999996		Osteoclast differentiation	hsa04380	0.859012	1
SNARE interactions in vesicular transport	hsa04130	0.911163	0.999996		Histidine metabolism	hsa00340	0.86933	1
alpha-Linolenic acid metabolism	hsa00592	0.911571	0.999996		Rheumatoid arthritis	hsa05323	0.874705	1
Maturity onset diabetes of the young	hsa04950	0.911571	0.999996		Leukocyte transendothelial migration	hsa04670	0.879305	1
Glycosaminoglycan biosynthesis - keratan sulfate	hsa00533	0.91304	0.999996		Fc epsilon RI signaling pathway	hsa04664	0.880506	1
Pertussis	hsa05133	0.915919	0.999996		beta-Alanine metabolism	hsa00410	0.881684	1
Gastric acid secretion	hsa04971	0.915919	0.999996		Retrograde endocannabinoid signaling	hsa04723	0.885838	1
Drug metabolism - cytochrome P450	hsa00982	0.92072	0.999996		Sulfur relay system	hsa04122	0.88601	1
Glycosphingolipid biosynthesis - lacto and neolacto series	hsa00601	0.9218	0.999996		Mucin type O-Glycan biosynthesis	hsa00512	0.89524	1
Primary immunodeficiency	hsa05340	0.928397	0.999996		Cytokine-cytokine receptor interaction	hsa04060	0.899767	1
Calcium signaling pathway	hsa04020	0.928674	0.999996		Glyoxylate and dicarboxylate metabolism	hsa00630	0.900206	1
Collecting duct acid secretion	hsa04966	0.930905	0.999996		Tuberculosis	hsa05152	0.903137	1
RIG-I-like receptor signaling pathway	hsa04622	0.932536	0.999996		Inflammatory bowel disease (IBD)	hsa05321	0.903701	1
Autoimmune thyroid disease	hsa05320	0.933898	0.999996		Proteasome	hsa03050	0.904762	1
Dopaminergic synapse	hsa04728	0.934056	0.999996		Parkinson's disease	hsa05012	0.905797	1
2-Oxocarboxylic acid metabolism	hsa01210	0.935925	0.999996		Carbohydrate digestion and absorption	hsa04973	0.914473	1
Pantothenate and CoA biosynthesis	hsa00770	0.935925	0.999996		Basal transcription factors	hsa03022	0.914473	1
Influenza A	hsa05164	0.942753	0.999996		Regulation of autophagy	hsa04140	0.915425	1
Cytosolic DNA-sensing pathway	hsa04623	0.943416	0.999996		Aldosterone-regulated sodium reabsorption	hsa04960	0.915425	1
Linoleic acid metabolism	hsa00591	0.946189	0.999996		Gastric acid secretion	hsa04971	0.921526	1
Protein digestion and absorption	hsa04974	0.947632	0.999996		T cell receptor signaling pathway	hsa04660	0.92815	1
Endocrine and other factor-regulated calcium reabsorption	hsa04961	0.948386	0.999996		Porphyrin and chlorophyll metabolism	hsa00860	0.933139	1
Circadian entrainment	hsa04713	0.948386	0.999996		Propanoate metabolism	hsa00640	0.934281	1
Transcriptional misregulation in cancer	hsa05202	0.948721	0.999996		Viral myocarditis	hsa05416	0.937522	1
Intestinal immune network for IgA production	hsa04672	0.953396	0.999996		Aminoacyl-tRNA biosynthesis	hsa00970	0.93794	1
Cell adhesion molecules (CAMs)	hsa04514	0.956235	0.999996		Type II diabetes mellitus	hsa04930	0.938606	1
Inflammatory bowel disease (IBD)	hsa05321	0.956682	0.999996		Cardiac muscle contraction	hsa04260	0.939861	1
Long-term potentiation	hsa04720	0.956682	0.999996		Linoleic acid metabolism	hsa00591	0.943005	1
Fat digestion and absorption	hsa04975	0.958902	0.999996		Pentose and glucuronate interconversions	hsa00040	0.944425	1
PPAR signaling pathway	hsa03320	0.963887	0.999996		Intestinal immune network for IgA production	hsa04672	0.945184	1
Retrograde endocannabinoid signaling	hsa04723	0.967237	0.999996		Chemokine signaling pathway	hsa04062	0.945601	1
Fatty acid degradation	hsa00071	0.970827	0.999996		Fatty acid degradation	hsa00071	0.953517	1
African trypanosomiasis	hsa05143	0.971547	0.999996		Cysteine and methionine metabolism	hsa00270	0.957328	1
Toll-like receptor signaling pathway	hsa04620	0.974111	0.999996		Cell adhesion molecules (CAMs)	hsa04514	0.960038	1
Rheumatoid arthritis	hsa05323	0.977069	0.999996		MicroRNAs in cancer	hsa05206	0.965512	1
Leishmaniasis	hsa05140	0.977365	0.999996		Salivary secretion	hsa04970	0.965845	1
Pentose and glucuronate interconversions	hsa00040	0.978042	0.999996		Bile secretion	hsa04976	0.96604	1
Fatty acid metabolism	hsa01212	0.979422	0.999996		Maturity onset diabetes of the young	hsa04950	0.966652	1
Staphylococcus aureus infection	hsa05150	0.97997	0.999996		Glycosylphosphatidylinositol(GPI)-anchor biosynthesis	hsa00563	0.966652	1
Alcoholism	hsa05034	0.980167	0.999996		Tryptophan metabolism	hsa00380	0.967411	1
Glyoxylate and dicarboxylate metabolism	hsa00630	0.981118	0.999996		Phagosome	hsa04145	0.971208	1
Malaria	hsa05144	0.983745	0.999996		Primary bile acid biosynthesis	hsa00120	0.971392	1
Cardiac muscle contraction	hsa04260	0.984606	0.999996		Fat digestion and absorption	hsa04975	0.971573	1
Complement and coagulation cascades	hsa04610	0.984801	0.999996		Oxidative phosphorylation	hsa00190	0.97237	1
Ascorbate and aldarate metabolism	hsa00053	0.986088	0.999996		Metabolism of xenobiotics by cytochrome P450	hsa00980	0.972462	1
Hematopoietic cell lineage	hsa04640	0.986151	0.999996		Natural killer cell mediated cytotoxicity	hsa04650	0.974519	1
Nicotine addiction	hsa05033	0.987001	0.999996		Staphylococcus aureus infection	hsa05150	0.978836	1
Arachidonic acid metabolism	hsa00590	0.988439	0.999996		Platelet activation	hsa04611	0.979737	1
Salivary secretion	hsa04970	0.988531	0.999996		Retinol metabolism	hsa00830	0.979754	1
Phototransduction	hsa04744	0.989751	0.999996		Serotonergic synapse	hsa04726	0.980767	1
Taste transduction	hsa04742	0.989927	0.999996		Phototransduction	hsa04744	0.982952	1
Tuberculosis	hsa05152	0.992737	0.999996		Ribosome	hsa03010	0.984346	1
Basal transcription factors	hsa03022	0.993316	0.999996		Toll-like receptor signaling pathway	hsa04620	0.986946	1
Pancreatic secretion	hsa04972	0.993569	0.999996		Arachidonic acid metabolism	hsa00590	0.988735	1
Serotonergic synapse	hsa04726	0.997283	0.999996		Nicotine addiction	hsa05033	0.989044	1
Ribosome	hsa03010	0.997702	0.999996		Systemic lupus erythematosus	hsa05322	0.992395	1
Cytokine-cytokine receptor interaction	hsa04060	0.998517	0.999996		Leishmaniasis	hsa05140	0.994068	1
Steroid hormone biosynthesis	hsa00140	0.998691	0.999996		Drug metabolism - cytochrome P450	hsa00982	0.994874	1
Drug metabolism - other enzymes	hsa00983	0.999237	0.999996		Ascorbate and aldarate metabolism	hsa00053	0.996032	1
Synaptic vesicle cycle	hsa04721	0.999429	0.999996		Graft-versus-host disease	hsa05332	0.998507	1
Systemic lupus erythematosus	hsa05322	0.999974	0.999996		Type I diabetes mellitus	hsa04940	0.998954	1
Neuroactive ligand-receptor interaction	hsa04080	0.999996	0.999996		Allograft rejection	hsa05330	0.99963	1
					Chemical carcinogenesis	hsa05204	0.999704	1
					Neuroactive ligand-receptor interaction	hsa04080	0.999716	1
					Taste transduction	hsa04742	0.999752	1
					Autoimmune thyroid disease	hsa05320	0.999793	1
					Olfactory transduction	hsa04740	1	1
