# Supplementary material for: The Specific Inhibition of SOD1 Selectively Promotes Apoptosis of Cancer Cells via Regulation of the ROS Signaling Network
Source: Oxid Med Cell Longev. 2019 Feb 18;2019:9706792. doi: 10.1155/2019/9706792 (PMC6398008; doi:10.1155/2019/9706792)
Supplement: Supplementary Materials — Figure S1: the levels of SOD1 in SOD1 knockdown HeLa cells and key DEGs in LD100-treated HeLa cells. Figure S2: SOD1 activity and H2O2 and O2 •− levels within LD100-treated DU145 and RWPE-1 cells. Figure S3: successful construction of mRNA sequencing in LD100-treated DU145 and RWPE-1 cells. Figure S4: many key genes in representative signaling pathways are selectively regulated upon the specific SOD1 inhibition. Figure S5: the specific SOD1 inhibition selectively regulates cancer pathways in cancer cells. Figure S6: many key genes in the cell cycle and p53 and apoptosis signaling pathways are selectively regulated upon the specific SOD1 inhibition. Figure S7: the specific SOD1 inhibition selectively activates the p53 signaling pathway in cancer cells. Figure S8: specific SOD1 inhibition represses the crosstalk of ERK, PI3K, and NF-κB signaling pathways in cancer cells. Figure S9: the specific SOD1 inhibition increases the intracellular peroxynitrite content. Figure S10: the specific SOD1 inhibition does not affect the growth and proliferation of normal cells. Table S1: quality evaluation of transcriptome library in HeLa cells. Table S2: GO classification of DEGs in LD100-treated and SOD1 knockdown HeLa cells. Table S3: KEGG pathway enrichment of DEGs in LD100-treated and SOD1 knockdown HeLa cells. Table S4: quality evaluation of transcriptome library in DU145 and RWPE-1 cells. Table S5: GO classification of DEGs in LD100-treated DU145 and RWPE-1 cells. Table S6: KEGG pathway enrichment of DEGs in LD100-treated DU145 and RWPE-1 cells. [file 9706792.f1.zip › Table S4.xls]

## Sheet: Sheet1
Quality evaluation of transcriptome library in DU145 and RWPE-1 cells
Sample_name	DC_1	DC_2	DC_3	DL_1	DL_2	DL_3	RC_1	RC_2	RC_3	RL_1	RL_2	RL_3
Total reads	58863510	62831036	60450898	70077492	65061500	57432994	83356638	48060356	55250308	65540850	58745022	65889384
Total mapped	55148508(93.69%)	58805630(93.59%)	56703189(93.8%)	66144402(94.39%)	61204317(94.07%)	54242743(94.45%)	78184696(93.8%)	45395787(94.46%)	51921819(93.98%)	61876400(94.41%)	55266512(94.08%)	62360256(94.64%)
Multiple mapped	1456588(2.47%)	1541871(2.45%)	1507299(2.49%)	1702390(2.43%)	1588606(2.44%)	1396841(2.43%)	2130120(2.56%)	1114239(2.32%)	1300340(2.35%)	1585625(2.42%)	1440567(2.45%)	1564138(2.37%)
Uniquely mapped	53691920(91.21%)	57263759(91.14%)	55195890(91.31%)	64442012(91.96%)	59615711(91.63%)	52845902(92.01%)	76054576(91.24%)	44281548(92.14%)	50621479(91.62%)	60290775(91.99%)	53825945(91.63%)	60796118(92.27%)
Splice reads	23425721(39.8%)	25039862(39.85%)	23997513(39.7%)	27105921(38.68%)	25188114(38.71%)	21995529(38.3%)	30823450(36.98%)	17358838(36.12%)	20292939(36.73%)	24844525(37.91%)	21755106(37.03%)	24756208(37.57%)
