# Supplementary material for: The Specific Inhibition of SOD1 Selectively Promotes Apoptosis of Cancer Cells via Regulation of the ROS Signaling Network
Source: Oxid Med Cell Longev. 2019 Feb 18;2019:9706792. doi: 10.1155/2019/9706792 (PMC6398008; doi:10.1155/2019/9706792)
Supplement: Supplementary Materials — Figure S1: the levels of SOD1 in SOD1 knockdown HeLa cells and key DEGs in LD100-treated HeLa cells. Figure S2: SOD1 activity and H2O2 and O2 •− levels within LD100-treated DU145 and RWPE-1 cells. Figure S3: successful construction of mRNA sequencing in LD100-treated DU145 and RWPE-1 cells. Figure S4: many key genes in representative signaling pathways are selectively regulated upon the specific SOD1 inhibition. Figure S5: the specific SOD1 inhibition selectively regulates cancer pathways in cancer cells. Figure S6: many key genes in the cell cycle and p53 and apoptosis signaling pathways are selectively regulated upon the specific SOD1 inhibition. Figure S7: the specific SOD1 inhibition selectively activates the p53 signaling pathway in cancer cells. Figure S8: specific SOD1 inhibition represses the crosstalk of ERK, PI3K, and NF-κB signaling pathways in cancer cells. Figure S9: the specific SOD1 inhibition increases the intracellular peroxynitrite content. Figure S10: the specific SOD1 inhibition does not affect the growth and proliferation of normal cells. Table S1: quality evaluation of transcriptome library in HeLa cells. Table S2: GO classification of DEGs in LD100-treated and SOD1 knockdown HeLa cells. Table S3: KEGG pathway enrichment of DEGs in LD100-treated and SOD1 knockdown HeLa cells. Table S4: quality evaluation of transcriptome library in DU145 and RWPE-1 cells. Table S5: GO classification of DEGs in LD100-treated DU145 and RWPE-1 cells. Table S6: KEGG pathway enrichment of DEGs in LD100-treated DU145 and RWPE-1 cells. [file 9706792.f1.zip › Table S5.xls]

## Sheet: Sheet1
GO classification of DEGs in LD100 treated DU145 cells						GO classification of DEGs in LD100 treated RWPE-1 cells
GO_accession	Description	Term_type	p-Value	padj		GO_accession	Description	Term_type	p-Value	padj
GO:0045296	cadherin binding	molecular_function	2.19033e-18	2.34803e-15		GO:0031012	extracellular matrix	cellular_component	1.22312e-16	6.91063e-14
GO:0031331	positive regulation of cellular catabolic process	biological_process	3.5593e-16	1.24142e-12		GO:0034340	response to type I interferon	biological_process	1.08309e-14	2.04057e-11
GO:0010498	proteasomal protein catabolic process	biological_process	4.30825e-16	1.24142e-12		GO:0060337	type I interferon signaling pathway	biological_process	1.29749e-14	2.04057e-11
GO:0009896	positive regulation of catabolic process	biological_process	8.10481e-16	1.55693e-12		GO:0071357	cellular response to type I interferon	biological_process	1.29749e-14	2.04057e-11
GO:0043161	proteasome-mediated ubiquitin-dependent protein catabolic process	biological_process	1.23557e-15	1.78014e-12		GO:0008202	steroid metabolic process	biological_process	1.53571e-14	2.04057e-11
GO:0000209	protein polyubiquitination	biological_process	1.84918e-13	2.13136e-10		GO:1902653	secondary alcohol biosynthetic process	biological_process	1.22295e-13	1.29999e-10
GO:0045732	positive regulation of protein catabolic process	biological_process	6.242e-13	5.99544e-10		GO:1902652	secondary alcohol metabolic process	biological_process	5.73973e-13	3.85254e-10
GO:1903364	positive regulation of cellular protein catabolic process	biological_process	2.11131e-12	1.65813e-09		GO:0006695	cholesterol biosynthetic process	biological_process	5.95127e-13	3.85254e-10
GO:0042176	regulation of protein catabolic process	biological_process	2.30176e-12	1.65813e-09		GO:0016125	sterol metabolic process	biological_process	7.28597e-13	3.85254e-10
GO:0050839	cell adhesion molecule binding	molecular_function	8.79565e-12	4.71447e-09		GO:0030198	extracellular matrix organization	biological_process	7.37897e-13	3.85254e-10
GO:1903052	positive regulation of proteolysis involved in cellular protein catabolic process	biological_process	1.14353e-11	7.3224e-09		GO:0016126	sterol biosynthetic process	biological_process	7.41076e-13	3.85254e-10
GO:0005925	focal adhesion	cellular_component	4.30134e-11	2.43064e-08		GO:0044283	small molecule biosynthetic process	biological_process	8.25833e-13	3.85254e-10
GO:0005924	cell-substrate adherens junction	cellular_component	6.91506e-11	2.43064e-08		GO:0043062	extracellular structure organization	biological_process	8.69811e-13	3.85254e-10
GO:0005759	mitochondrial matrix	cellular_component	1.18219e-10	2.77026e-08		GO:0008203	cholesterol metabolic process	biological_process	3.11647e-12	1.27416e-09
GO:0030055	cell-substrate junction	cellular_component	1.60453e-10	2.81997e-08		GO:0051272	positive regulation of cellular component movement	biological_process	3.65601e-12	1.38798e-09
GO:0005912	adherens junction	cellular_component	2.18718e-10	3.07517e-08		GO:0035455	response to interferon-alpha	biological_process	5.31167e-12	1.8821e-09
GO:0034976	response to endoplasmic reticulum stress	biological_process	8.77672e-11	5.05802e-08		GO:2000147	positive regulation of cell motility	biological_process	5.86378e-12	1.94788e-09
GO:1903362	regulation of cellular protein catabolic process	biological_process	1.52155e-10	7.97152e-08		GO:0006066	alcohol metabolic process	biological_process	8.52958e-12	2.66675e-09
GO:1903050	regulation of proteolysis involved in cellular protein catabolic process	biological_process	2.00017e-10	9.60581e-08		GO:1901615	organic hydroxy compound metabolic process	biological_process	1.63011e-11	4.81335e-09
GO:0042787	protein ubiquitination involved in ubiquitin-dependent protein catabolic process	biological_process	8.49693e-10	3.76676e-07		GO:0005578	proteinaceous extracellular matrix	cellular_component	1.7431e-11	4.92426e-09
GO:0051052	regulation of DNA metabolic process	biological_process	1.48534e-09	6.1143e-07		GO:0030335	positive regulation of cell migration	biological_process	2.18576e-11	6.11438e-09
GO:0022613	ribonucleoprotein complex biogenesis	biological_process	2.2174e-09	8.51927e-07		GO:0040017	positive regulation of locomotion	biological_process	3.78367e-11	9.54459e-09
GO:0035966	response to topologically incorrect protein	biological_process	2.41963e-09	8.7152e-07		GO:0042493	response to drug	biological_process	3.86466e-11	9.54459e-09
GO:0031396	regulation of protein ubiquitination	biological_process	2.57443e-09	8.72731e-07		GO:0046165	alcohol biosynthetic process	biological_process	3.95072e-11	9.54459e-09
GO:1901987	regulation of cell cycle phase transition	biological_process	5.57476e-09	1.78485e-06		GO:0090181	regulation of cholesterol metabolic process	biological_process	1.93304e-10	4.46701e-08
GO:1903320	regulation of protein modification by small protein conjugation or removal	biological_process	7.25378e-09	2.13216e-06		GO:0044420	extracellular matrix component	cellular_component	3.1143e-10	5.86527e-08
GO:0043620	regulation of DNA-templated transcription in response to stress	biological_process	7.39949e-09	2.13216e-06		GO:0019216	regulation of lipid metabolic process	biological_process	2.90609e-10	6.43578e-08
GO:0005743	mitochondrial inner membrane	cellular_component	1.88466e-08	2.2082e-06		GO:0006694	steroid biosynthetic process	biological_process	3.04324e-10	6.46992e-08
GO:0006986	response to unfolded protein	biological_process	1.14226e-08	3.1347e-06		GO:0019218	regulation of steroid metabolic process	biological_process	3.77821e-10	7.72353e-08
GO:0006260	DNA replication	biological_process	1.33037e-08	3.46435e-06		GO:0045540	regulation of cholesterol biosynthetic process	biological_process	8.37058e-10	1.64777e-07
GO:2001233	regulation of apoptotic signaling pathway	biological_process	1.43956e-08	3.46435e-06		GO:0006720	isoprenoid metabolic process	biological_process	1.01891e-09	1.93411e-07
GO:0006402	mRNA catabolic process	biological_process	1.44273e-08	3.46435e-06		GO:0050810	regulation of steroid biosynthetic process	biological_process	1.15562e-09	2.11797e-07
GO:0031252	cell leading edge	cellular_component	3.52269e-08	3.53779e-06		GO:0005912	adherens junction	cellular_component	1.82174e-09	2.57321e-07
GO:0043618	regulation of transcription from RNA polymerase II promoter in response to stress	biological_process	2.07677e-08	4.78738e-06		GO:0046890	regulation of lipid biosynthetic process	biological_process	1.56316e-09	2.7694e-07
GO:1901800	positive regulation of proteasomal protein catabolic process	biological_process	2.30847e-08	5.11682e-06		GO:0007584	response to nutrient	biological_process	1.69079e-09	2.89889e-07
GO:0008380	RNA splicing	biological_process	2.49425e-08	5.32383e-06		GO:0050839	cell adhesion molecule binding	molecular_function	4.07891e-10	3.86681e-07
GO:1901990	regulation of mitotic cell cycle phase transition	biological_process	2.86976e-08	5.90658e-06		GO:0006721	terpenoid metabolic process	biological_process	9.27274e-09	1.54014e-06
GO:0006979	response to oxidative stress	biological_process	3.24814e-08	6.2671e-06		GO:0009991	response to extracellular stimulus	biological_process	1.09399e-08	1.76198e-06
GO:0036294	cellular response to decreased oxygen levels	biological_process	3.29706e-08	6.2671e-06		GO:0005604	basement membrane	cellular_component	1.68805e-08	1.9075e-06
GO:0006401	RNA catabolic process	biological_process	3.37116e-08	6.2671e-06		GO:0031667	response to nutrient levels	biological_process	1.50741e-08	2.35644e-06
GO:0070646	protein modification by small protein removal	biological_process	5.24334e-08	9.30166e-06		GO:0006979	response to oxidative stress	biological_process	1.7287e-08	2.62515e-06
GO:0097193	intrinsic apoptotic signaling pathway	biological_process	5.47602e-08	9.30166e-06		GO:0031983	vesicle lumen	cellular_component	3.01126e-08	2.83561e-06
GO:0045862	positive regulation of proteolysis	biological_process	5.4877e-08	9.30166e-06		GO:0009636	response to toxic substance	biological_process	2.04347e-08	3.01695e-06
GO:0031145	anaphase-promoting complex-dependent catabolic process	biological_process	5.86522e-08	9.65751e-06		GO:1901617	organic hydroxy compound biosynthetic process	biological_process	2.39405e-08	3.43902e-06
GO:0071453	cellular response to oxygen levels	biological_process	6.06705e-08	9.71234e-06		GO:0060205	cytoplasmic vesicle lumen	cellular_component	6.64151e-08	5.36065e-06
GO:1902532	negative regulation of intracellular signal transduction	biological_process	6.33262e-08	9.86348e-06		GO:0042445	hormone metabolic process	biological_process	4.50636e-08	6.30297e-06
GO:0016570	histone modification	biological_process	6.56085e-08	9.95004e-06		GO:0005911	cell-cell junction	cellular_component	1.07062e-07	7.56124e-06
GO:0071456	cellular response to hypoxia	biological_process	7.01231e-08	1.0362e-05		GO:0016101	diterpenoid metabolic process	biological_process	5.83383e-08	7.95046e-06
GO:0007050	cell cycle arrest	biological_process	7.61093e-08	1.09654e-05		GO:0006631	fatty acid metabolic process	biological_process	6.10679e-08	8.11439e-06
GO:0033044	regulation of chromosome organization	biological_process	9.04174e-08	1.24991e-05		GO:0045785	positive regulation of cell adhesion	biological_process	6.65271e-08	8.62418e-06
GO:0031398	positive regulation of protein ubiquitination	biological_process	9.10922e-08	1.24991e-05		GO:0034754	cellular hormone metabolic process	biological_process	8.27945e-08	1.02923e-05
GO:0032436	positive regulation of proteasomal ubiquitin-dependent protein catabolic process	biological_process	9.49736e-08	1.25852e-05		GO:0031589	cell-substrate adhesion	biological_process	8.32677e-08	1.02923e-05
GO:0031397	negative regulation of protein ubiquitination	biological_process	9.60871e-08	1.25852e-05		GO:0034341	response to interferon-gamma	biological_process	8.7526e-08	1.05727e-05
GO:0071897	DNA biosynthetic process	biological_process	9.86925e-08	1.26392e-05		GO:0052547	regulation of peptidase activity	biological_process	1.1178e-07	1.30614e-05
GO:0019058	viral life cycle	biological_process	1.20954e-07	1.51534e-05		GO:1902930	regulation of alcohol biosynthetic process	biological_process	1.13043e-07	1.30614e-05
GO:0051443	positive regulation of ubiquitin-protein transferase activity	biological_process	1.62228e-07	1.98919e-05		GO:1990748	cellular detoxification	biological_process	1.25108e-07	1.41479e-05
GO:0016579	protein deubiquitination	biological_process	1.9262e-07	2.31264e-05		GO:0052548	regulation of endopeptidase activity	biological_process	1.54548e-07	1.7113e-05
GO:0031668	cellular response to extracellular stimulus	biological_process	1.99818e-07	2.3501e-05		GO:0008299	isoprenoid biosynthetic process	biological_process	1.62168e-07	1.75902e-05
GO:0010948	negative regulation of cell cycle process	biological_process	2.09631e-07	2.41621e-05		GO:0048514	blood vessel morphogenesis	biological_process	1.67797e-07	1.77079e-05
GO:0010506	regulation of autophagy	biological_process	2.65196e-07	2.99671e-05		GO:0001101	response to acid chemical	biological_process	1.69916e-07	1.77079e-05
GO:0051439	regulation of ubiquitin-protein ligase activity involved in mitotic cell cycle	biological_process	2.76552e-07	3.06494e-05		GO:0001523	retinoid metabolic process	biological_process	1.82467e-07	1.86502e-05
GO:0034470	ncRNA processing	biological_process	2.82264e-07	3.06922e-05		GO:0071229	cellular response to acid chemical	biological_process	1.94058e-07	1.94607e-05
GO:0045930	negative regulation of mitotic cell cycle	biological_process	2.90413e-07	3.09935e-05		GO:0034599	cellular response to oxidative stress	biological_process	2.00557e-07	1.974e-05
GO:1903322	positive regulation of protein modification by small protein conjugation or removal	biological_process	3.01416e-07	3.15829e-05		GO:0042060	wound healing	biological_process	2.30318e-07	2.22571e-05
GO:0071496	cellular response to external stimulus	biological_process	3.13732e-07	3.16541e-05		GO:0034774	secretory granule lumen	cellular_component	4.60122e-07	2.88854e-05
GO:0000956	nuclear-transcribed mRNA catabolic process	biological_process	3.16457e-07	3.16541e-05		GO:0098869	cellular oxidant detoxification	biological_process	3.19371e-07	3.02835e-05
GO:0036293	response to decreased oxygen levels	biological_process	3.18573e-07	3.16541e-05		GO:0098754	detoxification	biological_process	3.24771e-07	3.02835e-05
GO:0001666	response to hypoxia	biological_process	4.40906e-07	4.28067e-05		GO:0001655	urogenital system development	biological_process	3.61823e-07	3.31567e-05
GO:0051436	negative regulation of ubiquitin-protein ligase activity involved in mitotic cell cycle	biological_process	4.45671e-07	4.28067e-05		GO:0009615	response to virus	biological_process	4.34314e-07	3.80848e-05
GO:1903321	negative regulation of protein modification by small protein conjugation or removal	biological_process	4.83923e-07	4.57189e-05		GO:0043588	skin development	biological_process	4.34314e-07	3.80848e-05
GO:0030968	endoplasmic reticulum unfolded protein response	biological_process	5.42593e-07	5.04349e-05		GO:0010595	positive regulation of endothelial cell migration	biological_process	4.37098e-07	3.80848e-05
GO:0022618	ribonucleoprotein complex assembly	biological_process	5.93489e-07	5.42901e-05		GO:0030055	cell-substrate junction	cellular_component	7.43556e-07	4.20109e-05
GO:0043209	myelin sheath	cellular_component	6.40389e-07	5.62742e-05		GO:0005925	focal adhesion	cellular_component	8.31965e-07	4.27327e-05
GO:0044843	cell cycle G1/S phase transition	biological_process	6.4628e-07	5.81955e-05		GO:0032103	positive regulation of response to external stimulus	biological_process	5.39318e-07	4.62335e-05
GO:0031669	cellular response to nutrient levels	biological_process	6.58958e-07	5.84242e-05		GO:0001666	response to hypoxia	biological_process	5.55386e-07	4.65097e-05
GO:0034599	cellular response to oxidative stress	biological_process	6.74915e-07	5.89323e-05		GO:0002009	morphogenesis of an epithelium	biological_process	5.60042e-07	4.65097e-05
GO:2000058	regulation of protein ubiquitination involved in ubiquitin-dependent protein catabolic process	biological_process	7.70025e-07	6.62336e-05		GO:0070482	response to oxygen levels	biological_process	5.95217e-07	4.86705e-05
GO:0071826	ribonucleoprotein complex subunit organization	biological_process	7.86095e-07	6.66216e-05		GO:0005924	cell-substrate adherens junction	cellular_component	1.09281e-06	5.14532e-05
GO:0001933	negative regulation of protein phosphorylation	biological_process	8.2551e-07	6.84369e-05		GO:0051186	cofactor metabolic process	biological_process	6.58687e-07	5.30443e-05
GO:0070482	response to oxygen levels	biological_process	8.31265e-07	6.84369e-05		GO:0008544	epidermis development	biological_process	6.98574e-07	5.54167e-05
GO:1904668	positive regulation of ubiquitin protein ligase activity	biological_process	8.70981e-07	7.04354e-05		GO:0000922	spindle pole	cellular_component	1.36206e-06	5.91971e-05
GO:1901988	negative regulation of cell cycle phase transition	biological_process	8.88761e-07	7.04354e-05		GO:0005178	integrin binding	molecular_function	1.34369e-07	6.36911e-05
GO:0072331	signal transduction by p53 class mediator	biological_process	8.92206e-07	7.04354e-05		GO:0060759	regulation of response to cytokine stimulus	biological_process	9.5901e-07	7.49579e-05
GO:0035967	cellular response to topologically incorrect protein	biological_process	9.3416e-07	7.27509e-05		GO:2000146	negative regulation of cell motility	biological_process	9.80769e-07	7.55476e-05
GO:0000082	G1/S transition of mitotic cell cycle	biological_process	1.00037e-06	7.60389e-05		GO:0001525	angiogenesis	biological_process	1.05557e-06	8.01476e-05
GO:0030433	ubiquitin-dependent ERAD pathway	biological_process	1.00277e-06	7.60389e-05		GO:0072001	renal system development	biological_process	1.07639e-06	8.05775e-05
GO:0090150	establishment of protein localization to membrane	biological_process	1.08283e-06	8.10437e-05		GO:0005819	spindle	cellular_component	2.04449e-06	8.12823e-05
GO:2001234	negative regulation of apoptotic signaling pathway	biological_process	1.34658e-06	9.94918e-05		GO:0030496	midbody	cellular_component	2.15794e-06	8.12823e-05
GO:0006914	autophagy	biological_process	1.5477e-06	0.000112904		GO:0051271	negative regulation of cellular component movement	biological_process	1.14224e-06	8.43194e-05
GO:0051348	negative regulation of transferase activity	biological_process	1.67521e-06	0.000120678		GO:0070371	ERK1 and ERK2 cascade	biological_process	1.2038e-06	8.76467e-05
GO:1901991	negative regulation of mitotic cell cycle phase transition	biological_process	1.80559e-06	0.000128117		GO:0036293	response to decreased oxygen levels	biological_process	1.26564e-06	8.91655e-05
GO:0006278	RNA-dependent DNA biosynthetic process	biological_process	1.82295e-06	0.000128117		GO:2000379	positive regulation of reactive oxygen species metabolic process	biological_process	1.27152e-06	8.91655e-05
GO:0048193	Golgi vesicle transport	biological_process	1.9171e-06	0.000133111		GO:0050921	positive regulation of chemotaxis	biological_process	1.29177e-06	8.91655e-05
GO:0043409	negative regulation of MAPK cascade	biological_process	1.99121e-06	0.000136611		GO:0071346	cellular response to interferon-gamma	biological_process	1.29177e-06	8.91655e-05
GO:0061136	regulation of proteasomal protein catabolic process	biological_process	2.14081e-06	0.000143459		GO:0044723	single-organism carbohydrate metabolic process	biological_process	1.41898e-06	9.66907e-05
GO:2001252	positive regulation of chromosome organization	biological_process	2.14081e-06	0.000143459		GO:0016614	oxidoreductase activity, acting on CH-OH group of donors	molecular_function	3.28864e-07	0.000103921
GO:0016607	nuclear speck	cellular_component	1.86722e-06	0.000145851		GO:0003094	glomerular filtration	biological_process	1.59754e-06	0.00010748
GO:0034620	cellular response to unfolded protein	biological_process	2.22547e-06	0.000147418		GO:0051607	defense response to virus	biological_process	1.70443e-06	0.000113238
GO:0044839	cell cycle G2/M phase transition	biological_process	2.48084e-06	0.000162467		GO:0010817	regulation of hormone levels	biological_process	1.77701e-06	0.000116603
GO:0032434	regulation of proteasomal ubiquitin-dependent protein catabolic process	biological_process	2.54248e-06	0.000164632		GO:0010810	regulation of cell-substrate adhesion	biological_process	1.81899e-06	0.000117901
GO:0009267	cellular response to starvation	biological_process	2.72634e-06	0.000174577		GO:0006935	chemotaxis	biological_process	2.09049e-06	0.000132273
GO:0043487	regulation of RNA stability	biological_process	2.78111e-06	0.000176127		GO:0042330	taxis	biological_process	2.09049e-06	0.000132273
GO:2000060	positive regulation of protein ubiquitination involved in ubiquitin-dependent protein catabolic process	biological_process	2.88343e-06	0.00017693		GO:0010594	regulation of endothelial cell migration	biological_process	2.26149e-06	0.00014141
GO:0010833	telomere maintenance via telomere lengthening	biological_process	2.88589e-06	0.00017693		GO:0005996	monosaccharide metabolic process	biological_process	2.45007e-06	0.00015142
GO:0051437	positive regulation of ubiquitin-protein ligase activity involved in regulation of mitotic cell cycle transition	biological_process	2.88589e-06	0.00017693		GO:0097205	renal filtration	biological_process	2.9346e-06	0.000176015
GO:2001242	regulation of intrinsic apoptotic signaling pathway	biological_process	3.41711e-06	0.000207293		GO:0001822	kidney development	biological_process	2.9387e-06	0.000176015
GO:0051438	regulation of ubiquitin-protein transferase activity	biological_process	3.48862e-06	0.000209426		GO:0060326	cell chemotaxis	biological_process	2.94738e-06	0.000176015
GO:0043488	regulation of mRNA stability	biological_process	3.68886e-06	0.000219164		GO:0030336	negative regulation of cell migration	biological_process	3.09806e-06	0.000182958
GO:0030330	DNA damage response, signal transduction by p53 class mediator	biological_process	3.76589e-06	0.000221457		GO:0016209	antioxidant activity	molecular_function	8.80426e-07	0.000197858
GO:0000086	G2/M transition of mitotic cell cycle	biological_process	4.4929e-06	0.000261541		GO:0008106	alcohol dehydrogenase (NADP+) activity	molecular_function	1.04356e-06	0.000197858
GO:0007004	telomere maintenance via telomerase	biological_process	4.56882e-06	0.000263301		GO:0016051	carbohydrate biosynthetic process	biological_process	3.61598e-06	0.000211197
GO:0051444	negative regulation of ubiquitin-protein transferase activity	biological_process	5.22287e-06	0.000298014		GO:0019838	growth factor binding	molecular_function	1.36281e-06	0.000215325
GO:2001243	negative regulation of intrinsic apoptotic signaling pathway	biological_process	5.4346e-06	0.000307055		GO:0072686	mitotic spindle	cellular_component	6.60763e-06	0.000233332
GO:0034655	nucleobase-containing compound catabolic process	biological_process	6.21706e-06	0.000347853		GO:0044242	cellular lipid catabolic process	biological_process	4.13799e-06	0.000239059
GO:0006397	mRNA processing	biological_process	6.38293e-06	0.0003537		GO:0016616	oxidoreductase activity, acting on the CH-OH group of donors, NAD or NADP as acceptor	molecular_function	1.82814e-06	0.000247582
GO:1904667	negative regulation of ubiquitin protein ligase activity	biological_process	7.47611e-06	0.000410331		GO:0031099	regeneration	biological_process	4.34776e-06	0.000248223
GO:0042326	negative regulation of phosphorylation	biological_process	7.55637e-06	0.000410824		GO:0048732	gland development	biological_process	4.42571e-06	0.000248223
GO:0030027	lamellipodium	cellular_component	6.18646e-06	0.000434908		GO:1903034	regulation of response to wounding	biological_process	4.43672e-06	0.000248223
GO:1902807	negative regulation of cell cycle G1/S phase transition	biological_process	8.17716e-06	0.00044042		GO:0040013	negative regulation of locomotion	biological_process	4.60868e-06	0.000255158
GO:0051054	positive regulation of DNA metabolic process	biological_process	8.46693e-06	0.000451805		GO:0050920	regulation of chemotaxis	biological_process	5.13885e-06	0.000281577
GO:0071900	regulation of protein serine/threonine kinase activity	biological_process	9.30756e-06	0.000492105		GO:0072330	monocarboxylic acid biosynthetic process	biological_process	5.39652e-06	0.000292679
GO:0000375	RNA splicing, via transesterification reactions	biological_process	9.45199e-06	0.00049376		GO:0032526	response to retinoic acid	biological_process	5.56434e-06	0.000298732
GO:0006457	protein folding	biological_process	9.51021e-06	0.00049376		GO:0072593	reactive oxygen species metabolic process	biological_process	5.67984e-06	0.000301884
GO:2000278	regulation of DNA biosynthetic process	biological_process	9.95325e-06	0.000512148		GO:0006081	cellular aldehyde metabolic process	biological_process	6.32507e-06	0.000332849
GO:0061695	transferase complex, transferring phosphorus-containing groups	cellular_component	8.45877e-06	0.000540592		GO:0030260	entry into host cell	biological_process	6.69009e-06	0.000338646
GO:0006517	protein deglycosylation	biological_process	1.085e-05	0.000552837		GO:0044409	entry into host	biological_process	6.69009e-06	0.000338646
GO:0070373	negative regulation of ERK1 and ERK2 cascade	biological_process	1.10079e-05	0.000552837		GO:0051806	entry into cell of other organism involved in symbiotic interaction	biological_process	6.69009e-06	0.000338646
GO:0016072	rRNA metabolic process	biological_process	1.10318e-05	0.000552837		GO:0051828	entry into other organism involved in symbiotic interaction	biological_process	6.69009e-06	0.000338646
GO:0070849	response to epidermal growth factor	biological_process	1.1288e-05	0.000555214		GO:0001558	regulation of cell growth	biological_process	6.89893e-06	0.00034269
GO:0000377	RNA splicing, via transesterification reactions with bulged adenosine as nucleophile	biological_process	1.13682e-05	0.000555214		GO:0048545	response to steroid hormone	biological_process	6.89893e-06	0.00034269
GO:0000398	mRNA splicing, via spliceosome	biological_process	1.13682e-05	0.000555214		GO:0050900	leukocyte migration	biological_process	6.97873e-06	0.000343444
GO:0036503	ERAD pathway	biological_process	1.21088e-05	0.000581525		GO:0033273	response to vitamin	biological_process	7.24542e-06	0.000353297
GO:1904666	regulation of ubiquitin protein ligase activity	biological_process	1.21088e-05	0.000581525		GO:0007067	mitotic nuclear division	biological_process	7.47442e-06	0.000357359
GO:0003712	transcription cofactor activity	molecular_function	1.67199e-06	0.000597458		GO:0051493	regulation of cytoskeleton organization	biological_process	7.51e-06	0.000357359
GO:0006479	protein methylation	biological_process	1.28342e-05	0.00060626		GO:0010632	regulation of epithelial cell migration	biological_process	7.53043e-06	0.000357359
GO:0008213	protein alkylation	biological_process	1.28342e-05	0.00060626		GO:0033002	muscle cell proliferation	biological_process	7.74137e-06	0.000364118
GO:0006888	ER to Golgi vesicle-mediated transport	biological_process	1.38888e-05	0.000650741		GO:0002685	regulation of leukocyte migration	biological_process	8.03864e-06	0.000374784
GO:0098800	inner mitochondrial membrane protein complex	cellular_component	1.1122e-05	0.000651566		GO:0070372	regulation of ERK1 and ERK2 cascade	biological_process	8.15277e-06	0.0003768
GO:0006091	generation of precursor metabolites and energy	biological_process	1.44576e-05	0.000671928		GO:0010631	epithelial cell migration	biological_process	8.56386e-06	0.000392387
GO:2000134	negative regulation of G1/S transition of mitotic cell cycle	biological_process	1.4589e-05	0.000672611		GO:0035902	response to immobilization stress	biological_process	8.66643e-06	0.000393693
GO:0007067	mitotic nuclear division	biological_process	1.69832e-05	0.000776777		GO:0001667	ameboidal-type cell migration	biological_process	9.47725e-06	0.000426139
GO:0061418	regulation of transcription from RNA polymerase II promoter in response to hypoxia	biological_process	1.71586e-05	0.000778622		GO:0071300	cellular response to retinoic acid	biological_process	9.54102e-06	0.000426139
GO:0042594	response to starvation	biological_process	1.75325e-05	0.000789375		GO:0010634	positive regulation of epithelial cell migration	biological_process	9.66949e-06	0.000428278
GO:0051098	regulation of binding	biological_process	1.88681e-05	0.000842922		GO:0010951	negative regulation of endopeptidase activity	biological_process	9.76116e-06	0.000428765
GO:0006399	tRNA metabolic process	biological_process	1.96906e-05	0.0008729		GO:0001933	negative regulation of protein phosphorylation	biological_process	1.00371e-05	0.000437274
GO:0006977	DNA damage response, signal transduction by p53 class mediator resulting in cell cycle arrest	biological_process	2.0577e-05	0.00090523		GO:1902532	negative regulation of intracellular signal transduction	biological_process	1.05096e-05	0.000454136
GO:0036464	cytoplasmic ribonucleoprotein granule	cellular_component	1.8254e-05	0.000987122		GO:0090132	epithelium migration	biological_process	1.07318e-05	0.000458413
GO:1902749	regulation of cell cycle G2/M phase transition	biological_process	2.57842e-05	0.00112571		GO:0002687	positive regulation of leukocyte migration	biological_process	1.07811e-05	0.000458413
GO:0032984	macromolecular complex disassembly	biological_process	2.68586e-05	0.00116381		GO:0000281	mitotic cytokinesis	biological_process	1.13151e-05	0.000477301
GO:0016605	PML body	cellular_component	2.76065e-05	0.00125172		GO:0048660	regulation of smooth muscle cell proliferation	biological_process	1.14806e-05	0.000480469
GO:0008287	protein serine/threonine phosphatase complex	cellular_component	2.95741e-05	0.00125172		GO:0005201	extracellular matrix structural constituent	molecular_function	4.66723e-06	0.000500256
GO:1903293	phosphatase complex	cellular_component	2.95741e-05	0.00125172		GO:0016709	oxidoreductase activity, acting on paired donors, with incorporation or reduction of molecular oxygen, NAD(P)H as one donor, and incorporation of one atom of oxygen	molecular_function	4.74927e-06	0.000500256
GO:0005753	mitochondrial proton-transporting ATP synthase complex	cellular_component	3.15353e-05	0.00125172		GO:0043542	endothelial cell migration	biological_process	1.22645e-05	0.000509263
GO:0005635	nuclear envelope	cellular_component	3.20497e-05	0.00125172		GO:1901681	sulfur compound binding	molecular_function	5.71073e-06	0.000541377
GO:0018205	peptidyl-lysine modification	biological_process	2.97633e-05	0.00128004		GO:0044282	small molecule catabolic process	biological_process	1.32992e-05	0.000547948
GO:0035770	ribonucleoprotein granule	cellular_component	3.79767e-05	0.00140514		GO:0007162	negative regulation of cell adhesion	biological_process	1.38117e-05	0.000561349
GO:0000151	ubiquitin ligase complex	cellular_component	4.13978e-05	0.00145513		GO:0070997	neuron death	biological_process	1.38357e-05	0.000561349
GO:0043241	protein complex disassembly	biological_process	3.41835e-05	0.00145926		GO:0001959	regulation of cytokine-mediated signaling pathway	biological_process	1.68043e-05	0.000676629
GO:0001726	ruffle	cellular_component	4.56214e-05	0.00146429		GO:0090130	tissue migration	biological_process	1.8546e-05	0.000739248
GO:0044452	nucleolar part	cellular_component	4.70391e-05	0.00146429		GO:0042326	negative regulation of phosphorylation	biological_process	1.89005e-05	0.000739248
GO:0098798	mitochondrial protein complex	cellular_component	4.7907e-05	0.00146429		GO:0048659	smooth muscle cell proliferation	biological_process	1.89128e-05	0.000739248
GO:0072395	signal transduction involved in cell cycle checkpoint	biological_process	3.5287e-05	0.00147362		GO:0033559	unsaturated fatty acid metabolic process	biological_process	1.89159e-05	0.000739248
GO:0072401	signal transduction involved in DNA integrity checkpoint	biological_process	3.5287e-05	0.00147362		GO:0045296	cadherin binding	molecular_function	8.68329e-06	0.000748341
GO:0072422	signal transduction involved in DNA damage checkpoint	biological_process	3.5287e-05	0.00147362		GO:0001818	negative regulation of cytokine production	biological_process	1.93574e-05	0.000750981
GO:0015934	large ribosomal subunit	cellular_component	5.3243e-05	0.00155756		GO:0043209	myelin sheath	cellular_component	2.2835e-05	0.000758928
GO:0005801	cis-Golgi network	cellular_component	5.53899e-05	0.00155756		GO:0042470	melanosome	cellular_component	2.6366e-05	0.000784042
GO:0070059	intrinsic apoptotic signaling pathway in response to endoplasmic reticulum stress	biological_process	3.7687e-05	0.00156252		GO:0048770	pigment granule	cellular_component	2.6366e-05	0.000784042
GO:0000079	regulation of cyclin-dependent protein serine/threonine kinase activity	biological_process	3.90618e-05	0.00160795		GO:0009612	response to mechanical stimulus	biological_process	2.11758e-05	0.000815576
GO:0051169	nuclear transport	biological_process	4.18953e-05	0.00168047		GO:0032355	response to estradiol	biological_process	2.22228e-05	0.000849741
GO:0072431	signal transduction involved in mitotic G1 DNA damage checkpoint	biological_process	4.19898e-05	0.00168047		GO:0035384	thioester biosynthetic process	biological_process	2.33054e-05	0.000878498
GO:1902400	intracellular signal transduction involved in G1 DNA damage checkpoint	biological_process	4.19898e-05	0.00168047		GO:0071616	acyl-CoA biosynthetic process	biological_process	2.33054e-05	0.000878498
GO:2000573	positive regulation of DNA biosynthetic process	biological_process	4.19898e-05	0.00168047		GO:0010466	negative regulation of peptidase activity	biological_process	2.41179e-05	0.000902722
GO:1990090	cellular response to nerve growth factor stimulus	biological_process	4.63469e-05	0.00182372		GO:2001233	regulation of apoptotic signaling pathway	biological_process	2.51402e-05	0.000934408
GO:0071901	negative regulation of protein serine/threonine kinase activity	biological_process	4.63476e-05	0.00182372		GO:0061041	regulation of wound healing	biological_process	2.64125e-05	0.000971679
GO:0006913	nucleocytoplasmic transport	biological_process	4.66518e-05	0.00182372		GO:0016114	terpenoid biosynthetic process	biological_process	2.65087e-05	0.000971679
GO:0043624	cellular protein complex disassembly	biological_process	4.6835e-05	0.00182372		GO:0046364	monosaccharide biosynthetic process	biological_process	2.72e-05	0.000990192
GO:0006364	rRNA processing	biological_process	4.83616e-05	0.00187052		GO:0007369	gastrulation	biological_process	2.99066e-05	0.00107559
GO:0071364	cellular response to epidermal growth factor stimulus	biological_process	5.48324e-05	0.00210666		GO:0043281	regulation of cysteine-type endopeptidase activity involved in apoptotic process	biological_process	2.9964e-05	0.00107559
GO:0032212	positive regulation of telomere maintenance via telomerase	biological_process	5.74749e-05	0.00218715		GO:0001977	renal system process involved in regulation of blood volume	biological_process	3.01529e-05	0.00107559
GO:0009991	response to extracellular stimulus	biological_process	5.76865e-05	0.00218715		GO:0007264	small GTPase mediated signal transduction	biological_process	3.04004e-05	0.00107719
GO:0006414	translational elongation	biological_process	6.02708e-05	0.00225584		GO:0043394	proteoglycan binding	molecular_function	1.42287e-05	0.00112406
GO:0032869	cellular response to insulin stimulus	biological_process	6.0281e-05	0.00225584		GO:0006006	glucose metabolic process	biological_process	3.21192e-05	0.00112527
GO:0061630	ubiquitin protein ligase activity	molecular_function	1.07412e-05	0.00233835		GO:0010811	positive regulation of cell-substrate adhesion	biological_process	3.22924e-05	0.00112527
GO:0044389	ubiquitin-like protein ligase binding	molecular_function	1.09075e-05	0.00233835		GO:0051235	maintenance of location	biological_process	3.23927e-05	0.00112527
GO:0031625	ubiquitin protein ligase binding	molecular_function	1.57814e-05	0.00233835		GO:0008217	regulation of blood pressure	biological_process	3.3729e-05	0.00116409
GO:0003682	chromatin binding	molecular_function	1.73203e-05	0.00233835		GO:0046718	viral entry into host cell	biological_process	3.49889e-05	0.00119978
GO:0061659	ubiquitin-like protein ligase activity	molecular_function	1.74503e-05	0.00233835		GO:0046949	fatty-acyl-CoA biosynthetic process	biological_process	3.60114e-05	0.00122693
GO:0042254	ribosome biogenesis	biological_process	6.29555e-05	0.00234072		GO:0016705	oxidoreductase activity, acting on paired donors, with incorporation or reduction of molecular oxygen	molecular_function	1.6833e-05	0.00122751
GO:0032182	ubiquitin-like protein binding	molecular_function	1.99202e-05	0.00237272		GO:0004033	aldo-keto reductase (NADP) activity	molecular_function	1.85008e-05	0.00125277
GO:0051972	regulation of telomerase activity	biological_process	6.71624e-05	0.00248113		GO:0043122	regulation of I-kappaB kinase/NF-kappaB signaling	biological_process	3.77616e-05	0.00127836
GO:0046700	heterocycle catabolic process	biological_process	7.16771e-05	0.00263105		GO:0000302	response to reactive oxygen species	biological_process	3.89345e-05	0.00130362
GO:0034614	cellular response to reactive oxygen species	biological_process	7.2862e-05	0.00265762		GO:0061640	cytoskeleton-dependent cytokinesis	biological_process	3.89983e-05	0.00130362
GO:0044270	cellular nitrogen compound catabolic process	biological_process	7.3634e-05	0.00266889		GO:0000070	mitotic sister chromatid segregation	biological_process	3.97623e-05	0.00131581
GO:0006275	regulation of DNA replication	biological_process	7.95178e-05	0.00281714		GO:0019318	hexose metabolic process	biological_process	4.01055e-05	0.00131581
GO:0032606	type I interferon production	biological_process	7.95178e-05	0.00281714		GO:2000116	regulation of cysteine-type endopeptidase activity	biological_process	4.01055e-05	0.00131581
GO:0006475	internal protein amino acid acetylation	biological_process	7.97937e-05	0.00281714		GO:0051098	regulation of binding	biological_process	4.07563e-05	0.00132896
GO:0015980	energy derivation by oxidation of organic compounds	biological_process	8.1229e-05	0.00281714		GO:0014065	phosphatidylinositol 3-kinase signaling	biological_process	4.22735e-05	0.00137002
GO:0042770	signal transduction in response to DNA damage	biological_process	8.16702e-05	0.00281714		GO:0002688	regulation of leukocyte chemotaxis	biological_process	4.30074e-05	0.00138489
GO:0072413	signal transduction involved in mitotic cell cycle checkpoint	biological_process	8.19959e-05	0.00281714		GO:0051402	neuron apoptotic process	biological_process	4.3393e-05	0.00138489
GO:1902402	signal transduction involved in mitotic DNA damage checkpoint	biological_process	8.19959e-05	0.00281714		GO:0016049	cell growth	biological_process	4.35139e-05	0.00138489
GO:1902403	signal transduction involved in mitotic DNA integrity checkpoint	biological_process	8.19959e-05	0.00281714		GO:2001236	regulation of extrinsic apoptotic signaling pathway	biological_process	4.40265e-05	0.00139286
GO:1904029	regulation of cyclin-dependent protein kinase activity	biological_process	8.24216e-05	0.00281714		GO:0098542	defense response to other organism	biological_process	4.44374e-05	0.00139754
GO:0042542	response to hydrogen peroxide	biological_process	8.26126e-05	0.00281714		GO:0000819	sister chromatid segregation	biological_process	4.55481e-05	0.00142405
GO:0032481	positive regulation of type I interferon production	biological_process	8.47737e-05	0.00287383		GO:0022617	extracellular matrix disassembly	biological_process	4.77702e-05	0.00147542
GO:0031667	response to nutrient levels	biological_process	8.83462e-05	0.00297742		GO:1901861	regulation of muscle tissue development	biological_process	4.80112e-05	0.00147542
GO:0010008	endosome membrane	cellular_component	0.000113099	0.00305802		GO:0007088	regulation of mitotic nuclear division	biological_process	4.8024e-05	0.00147542
GO:0006413	translational initiation	biological_process	9.13755e-05	0.0030599		GO:0101002	ficolin-1-rich granule	cellular_component	5.56598e-05	0.00149751
GO:1904358	positive regulation of telomere maintenance via telomere lengthening	biological_process	9.18553e-05	0.0030599		GO:1904813	ficolin-1-rich granule lumen	cellular_component	5.56598e-05	0.00149751
GO:0019902	phosphatase binding	molecular_function	3.20862e-05	0.00317386		GO:0071356	cellular response to tumor necrosis factor	biological_process	5.16711e-05	0.00157835
GO:0004674	protein serine/threonine kinase activity	molecular_function	3.28211e-05	0.00317386		GO:0016903	oxidoreductase activity, acting on the aldehyde or oxo group of donors	molecular_function	2.53711e-05	0.00160227
GO:0016747	transferase activity, transferring acyl groups other than amino-acyl groups	molecular_function	3.71888e-05	0.00317386		GO:0005539	glycosaminoglycan binding	molecular_function	2.70425e-05	0.00160227
GO:0004842	ubiquitin-protein transferase activity	molecular_function	4.01862e-05	0.00317386		GO:0006805	xenobiotic metabolic process	biological_process	5.36056e-05	0.00162808
GO:0043021	ribonucleoprotein complex binding	molecular_function	4.19671e-05	0.00317386		GO:0042180	cellular ketone metabolic process	biological_process	5.49381e-05	0.00165907
GO:0016779	nucleotidyltransferase activity	molecular_function	4.63079e-05	0.00317386		GO:0060760	positive regulation of response to cytokine stimulus	biological_process	5.63975e-05	0.00168182
GO:0043130	ubiquitin binding	molecular_function	4.73711e-05	0.00317386		GO:0031100	animal organ regeneration	biological_process	5.67693e-05	0.00168182
GO:0019903	protein phosphatase binding	molecular_function	5.14151e-05	0.00324218		GO:0034109	homotypic cell-cell adhesion	biological_process	5.67693e-05	0.00168182
GO:0070469	respiratory chain	cellular_component	0.000126901	0.00329413		GO:1901214	regulation of neuron death	biological_process	5.69572e-05	0.00168182
GO:0045259	proton-transporting ATP synthase complex	cellular_component	0.000131203	0.00329413		GO:0010035	response to inorganic substance	biological_process	6.1348e-05	0.00178353
GO:0005840	ribosome	cellular_component	0.000143792	0.00339501		GO:0010965	regulation of mitotic sister chromatid separation	biological_process	6.14086e-05	0.00178353
GO:0000152	nuclear ubiquitin ligase complex	cellular_component	0.000148961	0.00339501		GO:0050918	positive chemotaxis	biological_process	6.14086e-05	0.00178353
GO:0030176	integral component of endoplasmic reticulum membrane	cellular_component	0.000154194	0.00339501		GO:0007568	aging	biological_process	6.24313e-05	0.00180338
GO:0030532	small nuclear ribonucleoprotein complex	cellular_component	0.000155548	0.00339501		GO:0051651	maintenance of location in cell	biological_process	6.30993e-05	0.00180753
GO:0034709	methylosome	cellular_component	0.000159367	0.00339501		GO:0048144	fibroblast proliferation	biological_process	6.32551e-05	0.00180753
GO:0000302	response to reactive oxygen species	biological_process	0.000102574	0.00339733		GO:0007272	ensheathment of neurons	biological_process	6.43927e-05	0.00182046
GO:0032479	regulation of type I interferon production	biological_process	0.000110382	0.00363502		GO:0008366	axon ensheathment	biological_process	6.43927e-05	0.00182046
GO:0045787	positive regulation of cell cycle	biological_process	0.000121004	0.00396219		GO:0016053	organic acid biosynthetic process	biological_process	6.69032e-05	0.00187153
GO:0000288	nuclear-transcribed mRNA catabolic process, deadenylation-dependent decay	biological_process	0.000123652	0.0040034		GO:0046394	carboxylic acid biosynthetic process	biological_process	6.69032e-05	0.00187153
GO:0032204	regulation of telomere maintenance	biological_process	0.000123652	0.0040034		GO:0035456	response to interferon-beta	biological_process	6.86104e-05	0.00189929
GO:0051017	actin filament bundle assembly	biological_process	0.000124774	0.00401717		GO:0042573	retinoic acid metabolic process	biological_process	6.86104e-05	0.00189929
GO:1902806	regulation of cell cycle G1/S phase transition	biological_process	0.000126529	0.00402662		GO:0030258	lipid modification	biological_process	6.90779e-05	0.00190233
GO:0043393	regulation of protein binding	biological_process	0.000126715	0.00402662		GO:0043536	positive regulation of blood vessel endothelial cell migration	biological_process	7.40338e-05	0.0020283
GO:0032206	positive regulation of telomere maintenance	biological_process	0.000127164	0.00402662		GO:0001704	formation of primary germ layer	biological_process	7.50679e-05	0.00204608
GO:0019787	ubiquitin-like protein transferase activity	molecular_function	6.79501e-05	0.00404681		GO:0019748	secondary metabolic process	biological_process	7.88537e-05	0.00212745
GO:0034708	methyltransferase complex	cellular_component	0.000198206	0.00409819		GO:1905818	regulation of chromosome separation	biological_process	7.88537e-05	0.00212745
GO:0031647	regulation of protein stability	biological_process	0.000140301	0.00441834		GO:0006826	iron ion transport	biological_process	7.98156e-05	0.00214253
GO:1904356	regulation of telomere maintenance via telomere lengthening	biological_process	0.000149605	0.00468572		GO:0015918	sterol transport	biological_process	8.35784e-05	0.0022211
GO:0051973	positive regulation of telomerase activity	biological_process	0.00015296	0.00472519		GO:1903035	negative regulation of response to wounding	biological_process	8.35784e-05	0.0022211
GO:0007173	epidermal growth factor receptor signaling pathway	biological_process	0.000153476	0.00472519		GO:0051701	interaction with host	biological_process	8.43914e-05	0.00223154
GO:0036498	IRE1-mediated unfolded protein response	biological_process	0.000154062	0.00472519		GO:0016102	diterpenoid biosynthetic process	biological_process	8.48795e-05	0.00223334
GO:0045333	cellular respiration	biological_process	0.000154145	0.00472519		GO:0071417	cellular response to organonitrogen compound	biological_process	8.72124e-05	0.00226188
GO:0005680	anaphase-promoting complex	cellular_component	0.000238236	0.00478515		GO:0015682	ferric iron transport	biological_process	8.72407e-05	0.00226188
GO:0016573	histone acetylation	biological_process	0.000160851	0.00490469		GO:0072512	trivalent inorganic cation transport	biological_process	8.72407e-05	0.00226188
GO:0000792	heterochromatin	cellular_component	0.000255461	0.00498858		GO:0071496	cellular response to external stimulus	biological_process	8.94596e-05	0.00230814
GO:0009199	ribonucleoside triphosphate metabolic process	biological_process	0.00016545	0.00501835		GO:0048015	phosphatidylinositol-mediated signaling	biological_process	9.40018e-05	0.00241362
GO:0071156	regulation of cell cycle arrest	biological_process	0.000167584	0.00505648		GO:0071900	regulation of protein serine/threonine kinase activity	biological_process	9.59859e-05	0.00244482
GO:0009144	purine nucleoside triphosphate metabolic process	biological_process	0.000171264	0.00511817		GO:0048678	response to axon injury	biological_process	9.6314e-05	0.00244482
GO:0016241	regulation of macroautophagy	biological_process	0.000172648	0.00511817		GO:1900024	regulation of substrate adhesion-dependent cell spreading	biological_process	9.65967e-05	0.00244482
GO:0061014	positive regulation of mRNA catabolic process	biological_process	0.000173613	0.00511817		GO:0051783	regulation of nuclear division	biological_process	9.8e-05	0.00246858
GO:1901522	positive regulation of transcription from RNA polymerase II promoter involved in cellular response to chemical stimulus	biological_process	0.000173613	0.00511817		GO:0007052	mitotic spindle organization	biological_process	9.95832e-05	0.00247068
GO:1990823	response to leukemia inhibitory factor	biological_process	0.000174957	0.00511817		GO:1902850	microtubule cytoskeleton organization involved in mitosis	biological_process	9.95832e-05	0.00247068
GO:1990830	cellular response to leukemia inhibitory factor	biological_process	0.000174957	0.00511817		GO:0016202	regulation of striated muscle tissue development	biological_process	0.000100217	0.00247068
GO:0007051	spindle organization	biological_process	0.000181576	0.00527493		GO:0051306	mitotic sister chromatid separation	biological_process	0.000100456	0.00247068
GO:0009161	ribonucleoside monophosphate metabolic process	biological_process	0.000182147	0.00527493		GO:0048525	negative regulation of viral process	biological_process	0.000101207	0.00247068
GO:0009411	response to UV	biological_process	0.000185774	0.00535307		GO:0071466	cellular response to xenobiotic stimulus	biological_process	0.000101207	0.00247068
GO:0009167	purine ribonucleoside monophosphate metabolic process	biological_process	0.000189447	0.00539098		GO:0009410	response to xenobiotic stimulus	biological_process	0.000101337	0.00247068
GO:0009205	purine ribonucleoside triphosphate metabolic process	biological_process	0.000189754	0.00539098		GO:0001664	G-protein coupled receptor binding	molecular_function	4.48861e-05	0.00250306
GO:0018393	internal peptidyl-lysine acetylation	biological_process	0.000189896	0.00539098		GO:0048017	inositol lipid-mediated signaling	biological_process	0.000104589	0.0025383
GO:0010389	regulation of G2/M transition of mitotic cell cycle	biological_process	0.000197114	0.00552416		GO:0016042	lipid catabolic process	biological_process	0.000106626	0.00257222
GO:0090002	establishment of protein localization to plasma membrane	biological_process	0.000197309	0.00552416		GO:0071559	response to transforming growth factor beta	biological_process	0.000106954	0.00257222
GO:0070936	protein K48-linked ubiquitination	biological_process	0.000198849	0.00552416		GO:0016324	apical plasma membrane	cellular_component	0.000101138	0.0025974
GO:0007052	mitotic spindle organization	biological_process	0.00019938	0.00552416		GO:0042552	myelination	biological_process	0.000117835	0.00282075
GO:1902850	microtubule cytoskeleton organization involved in mitosis	biological_process	0.00019938	0.00552416		GO:0061045	negative regulation of wound healing	biological_process	0.000118349	0.00282075
GO:0016236	macroautophagy	biological_process	0.000201095	0.00554503		GO:1901616	organic hydroxy compound catabolic process	biological_process	0.000124401	0.00294451
GO:0061572	actin filament bundle organization	biological_process	0.000203466	0.00558369		GO:0035272	exocrine system development	biological_process	0.00012465	0.00294451
GO:0038127	ERBB signaling pathway	biological_process	0.000205611	0.00561582		GO:0006801	superoxide metabolic process	biological_process	0.000127014	0.00298707
GO:0007569	cell aging	biological_process	0.000215638	0.00585261		GO:0048634	regulation of muscle organ development	biological_process	0.000132617	0.00310512
GO:0032210	regulation of telomere maintenance via telomerase	biological_process	0.000216312	0.00585261		GO:0045995	regulation of embryonic development	biological_process	0.000135456	0.00315767
GO:0044033	multi-organism metabolic process	biological_process	0.00021991	0.00591308		GO:0003014	renal system process	biological_process	0.000136435	0.0031666
GO:1905897	regulation of response to endoplasmic reticulum stress	biological_process	0.000220599	0.00591308		GO:0003071	renal system process involved in regulation of systemic arterial blood pressure	biological_process	0.000138091	0.00317728
GO:0019439	aromatic compound catabolic process	biological_process	0.000225837	0.00602545		GO:0008210	estrogen metabolic process	biological_process	0.000138091	0.00317728
GO:0043154	negative regulation of cysteine-type endopeptidase activity involved in apoptotic process	biological_process	0.000231587	0.00614164		GO:0014066	regulation of phosphatidylinositol 3-kinase signaling	biological_process	0.000140822	0.00322616
GO:0038061	NIK/NF-kappaB signaling	biological_process	0.000232323	0.00614164		GO:0060333	interferon-gamma-mediated signaling pathway	biological_process	0.000144671	0.0033001
GO:1990089	response to nerve growth factor	biological_process	0.000234443	0.00616937		GO:0002683	negative regulation of immune system process	biological_process	0.000145734	0.00331015
GO:0009126	purine nucleoside monophosphate metabolic process	biological_process	0.000239243	0.00626708		GO:0031641	regulation of myelination	biological_process	0.000148467	0.00335788
GO:0005681	spliceosomal complex	cellular_component	0.000337448	0.00634657		GO:0002064	epithelial cell development	biological_process	0.000155694	0.00350642
GO:0031227	intrinsic component of endoplasmic reticulum membrane	cellular_component	0.000343058	0.00634657		GO:0050878	regulation of body fluid levels	biological_process	0.000158706	0.00355917
GO:0044391	ribosomal subunit	cellular_component	0.000354592	0.00639175		GO:0045071	negative regulation of viral genome replication	biological_process	0.00015944	0.00356061
GO:0010639	negative regulation of organelle organization	biological_process	0.000254646	0.00664038		GO:0048661	positive regulation of smooth muscle cell proliferation	biological_process	0.00016066	0.00357284
GO:1905368	peptidase complex	cellular_component	0.000395515	0.00682907		GO:2000377	regulation of reactive oxygen species metabolic process	biological_process	0.000161583	0.00357839
GO:0000502	proteasome complex	cellular_component	0.000398281	0.00682907		GO:0032496	response to lipopolysaccharide	biological_process	0.000163358	0.00360268
GO:0051865	protein autoubiquitination	biological_process	0.000273326	0.00706626		GO:0016137	glycoside metabolic process	biological_process	0.000168537	0.00370155
GO:0051701	interaction with host	biological_process	0.00027343	0.00706626		GO:0048145	regulation of fibroblast proliferation	biological_process	0.000172337	0.0037237
GO:0031965	nuclear membrane	cellular_component	0.000424442	0.00707695		GO:0000022	mitotic spindle elongation	biological_process	0.000172348	0.0037237
GO:0005819	spindle	cellular_component	0.000436601	0.00707695		GO:0003093	regulation of glomerular filtration	biological_process	0.000172348	0.0037237
GO:0005746	mitochondrial respiratory chain	cellular_component	0.000442939	0.00707695		GO:0071372	cellular response to follicle-stimulating hormone stimulus	biological_process	0.000172348	0.0037237
GO:1901796	regulation of signal transduction by p53 class mediator	biological_process	0.000277086	0.00712878		GO:0051302	regulation of cell division	biological_process	0.00017401	0.00374438
GO:0044440	endosomal part	cellular_component	0.000474701	0.00741588		GO:0030100	regulation of endocytosis	biological_process	0.000175419	0.00374438
GO:1901361	organic cyclic compound catabolic process	biological_process	0.00029412	0.0075334		GO:0071560	cellular response to transforming growth factor beta stimulus	biological_process	0.000175419	0.00374438
GO:0070979	protein K11-linked ubiquitination	biological_process	0.000296089	0.00755028		GO:0042277	peptide binding	molecular_function	7.15186e-05	0.00376664
GO:0005793	endoplasmic reticulum-Golgi intermediate compartment	cellular_component	0.000510007	0.00779251		GO:0033572	transferrin transport	biological_process	0.000179748	0.00379552
GO:0000307	cyclin-dependent protein kinase holoenzyme complex	cellular_component	0.000520979	0.00779251		GO:0043154	negative regulation of cysteine-type endopeptidase activity involved in apoptotic process	biological_process	0.000179957	0.00379552
GO:0016571	histone methylation	biological_process	0.000307014	0.00779438		GO:0051983	regulation of chromosome segregation	biological_process	0.000179957	0.00379552
GO:0003684	damaged DNA binding	molecular_function	0.000138643	0.00782241		GO:0097305	response to alcohol	biological_process	0.000183142	0.00384743
GO:0000407	pre-autophagosomal structure	cellular_component	0.000535761	0.00784667		GO:0043523	regulation of neuron apoptotic process	biological_process	0.000187852	0.0039073
GO:0044455	mitochondrial membrane part	cellular_component	0.000550553	0.00789876		GO:0007249	I-kappaB kinase/NF-kappaB signaling	biological_process	0.000188197	0.0039073
GO:0030135	coated vesicle	cellular_component	0.000566538	0.00796552		GO:0034612	response to tumor necrosis factor	biological_process	0.000188197	0.0039073
GO:0006470	protein dephosphorylation	biological_process	0.000329529	0.00832929		GO:0043534	blood vessel endothelial cell migration	biological_process	0.000192772	0.00398671
GO:0001882	nucleoside binding	molecular_function	0.000160173	0.00833947		GO:0090596	sensory organ morphogenesis	biological_process	0.000194802	0.00401307
GO:0008022	protein C-terminus binding	molecular_function	0.000163366	0.00833947		GO:0051233	spindle midzone	cellular_component	0.00016431	0.0040363
GO:0032868	response to insulin	biological_process	0.000333889	0.00840262		GO:0090307	mitotic spindle assembly	biological_process	0.000198774	0.00407908
GO:0006473	protein acetylation	biological_process	0.000336736	0.00843743		GO:0045862	positive regulation of proteolysis	biological_process	0.000201261	0.00408798
GO:0009123	nucleoside monophosphate metabolic process	biological_process	0.000340104	0.00848493		GO:0032970	regulation of actin filament-based process	biological_process	0.000201715	0.00408798
GO:0051168	nuclear export	biological_process	0.000342211	0.00850069		GO:0007091	metaphase/anaphase transition of mitotic cell cycle	biological_process	0.000202284	0.00408798
GO:0043543	protein acylation	biological_process	0.000348729	0.00862544		GO:0044784	metaphase/anaphase transition of cell cycle	biological_process	0.000202284	0.00408798
GO:0046034	ATP metabolic process	biological_process	0.000351466	0.0086307		GO:0005796	Golgi lumen	cellular_component	0.000173899	0.00409388
GO:0006900	membrane budding	biological_process	0.000351937	0.0086307		GO:0032102	negative regulation of response to external stimulus	biological_process	0.000211244	0.00423373
GO:0034101	erythrocyte homeostasis	biological_process	0.000354741	0.00866259		GO:0014912	negative regulation of smooth muscle cell migration	biological_process	0.000211886	0.00423373
GO:0002262	myeloid cell homeostasis	biological_process	0.000364272	0.0088578		GO:0061436	establishment of skin barrier	biological_process	0.000211886	0.00423373
GO:2000045	regulation of G1/S transition of mitotic cell cycle	biological_process	0.000377187	0.00913331		GO:0044236	multicellular organism metabolic process	biological_process	0.000216197	0.00430369
GO:1905369	endopeptidase complex	cellular_component	0.000666999	0.00919412		GO:0043405	regulation of MAP kinase activity	biological_process	0.000217787	0.00431917
GO:2001020	regulation of response to DNA damage stimulus	biological_process	0.000384854	0.00927996		GO:0071295	cellular response to vitamin	biological_process	0.000219247	0.00433196
GO:2000117	negative regulation of cysteine-type endopeptidase activity	biological_process	0.000387617	0.00930765		GO:0008201	heparin binding	molecular_function	8.8319e-05	0.00440665
GO:0098803	respiratory chain complex	cellular_component	0.000694224	0.00938538		GO:0006732	coenzyme metabolic process	biological_process	0.000226881	0.00446619
GO:0051493	regulation of cytoskeleton organization	biological_process	0.000396425	0.00947966		GO:0002690	positive regulation of leukocyte chemotaxis	biological_process	0.000230336	0.00451747
GO:0019318	hexose metabolic process	biological_process	0.000403334	0.00951471		GO:0031960	response to corticosteroid	biological_process	0.000231704	0.00452759
GO:0030038	contractile actin filament bundle assembly	biological_process	0.000404495	0.00951471		GO:0010975	regulation of neuron projection development	biological_process	0.000237609	0.0045896
GO:0043149	stress fiber assembly	biological_process	0.000404495	0.00951471		GO:0035329	hippo signaling	biological_process	0.000237776	0.0045896
GO:0070301	cellular response to hydrogen peroxide	biological_process	0.000404495	0.00951471		GO:0048285	organelle fission	biological_process	0.000237779	0.0045896
GO:0101002	ficolin-1-rich granule	cellular_component	0.000757511	0.0098495		GO:0030595	leukocyte chemotaxis	biological_process	0.000238331	0.0045896
GO:1904813	ficolin-1-rich granule lumen	cellular_component	0.000757511	0.0098495		GO:0051056	regulation of small GTPase mediated signal transduction	biological_process	0.000239241	0.0045905
GO:0005721	pericentric heterochromatin	cellular_component	0.000770587	0.0098495		GO:0034446	substrate adhesion-dependent cell spreading	biological_process	0.000241842	0.00462371
GO:0001650	fibrillar center	cellular_component	0.000802506	0.0100743		GO:0046686	response to cadmium ion	biological_process	0.000246187	0.00467315
GO:0010494	cytoplasmic stress granule	cellular_component	0.000820751	0.0101226		GO:0070527	platelet aggregation	biological_process	0.000246187	0.00467315
GO:0001883	purine nucleoside binding	molecular_function	0.000214285	0.0104415		GO:0030301	cholesterol transport	biological_process	0.000256456	0.00485077
GO:0005769	early endosome	cellular_component	0.000863098	0.0104613		GO:0051384	response to glucocorticoid	biological_process	0.00025759	0.00485494
GO:1905330	regulation of morphogenesis of an epithelium	biological_process	0.000460311	0.0107266		GO:0006633	fatty acid biosynthetic process	biological_process	0.00026896	0.00505132
GO:0044783	G1 DNA damage checkpoint	biological_process	0.000460751	0.0107266		GO:0010769	regulation of cell morphogenesis involved in differentiation	biological_process	0.00027016	0.00505598
GO:0018105	peptidyl-serine phosphorylation	biological_process	0.000462753	0.0107266		GO:0060070	canonical Wnt signaling pathway	biological_process	0.000274004	0.00509395
GO:0038095	Fc-epsilon receptor signaling pathway	biological_process	0.00046346	0.0107266		GO:0003073	regulation of systemic arterial blood pressure	biological_process	0.000274106	0.00509395
GO:0097525	spliceosomal snRNP complex	cellular_component	0.000906823	0.010805		GO:0003725	double-stranded RNA binding	molecular_function	0.000113559	0.00514193
GO:0000932	P-body	cellular_component	0.000933787	0.0109409		GO:0071813	lipoprotein particle binding	molecular_function	0.000119328	0.00514193
GO:0006893	Golgi to plasma membrane transport	biological_process	0.000477124	0.0109548		GO:0071814	protein-lipid complex binding	molecular_function	0.000119328	0.00514193
GO:0048008	platelet-derived growth factor receptor signaling pathway	biological_process	0.000477124	0.0109548		GO:0002237	response to molecule of bacterial origin	biological_process	0.000279973	0.00518487
GO:0005525	GTP binding	molecular_function	0.000237272	0.011059		GO:1901863	positive regulation of muscle tissue development	biological_process	0.000281412	0.00519341
GO:0007030	Golgi organization	biological_process	0.000483978	0.0110681		GO:0001676	long-chain fatty acid metabolic process	biological_process	0.000289888	0.00533133
GO:0005775	vacuolar lumen	cellular_component	0.000978176	0.0112731		GO:0031091	platelet alpha granule	cellular_component	0.000241715	0.00534566
GO:0099568	cytoplasmic region	cellular_component	0.00099944	0.0113324		GO:0016528	sarcoplasm	cellular_component	0.000255457	0.00534566
GO:0032922	circadian regulation of gene expression	biological_process	0.000500135	0.0113924		GO:0031093	platelet alpha granule lumen	cellular_component	0.000255457	0.00534566
GO:0000289	nuclear-transcribed mRNA poly(A) tail shortening	biological_process	0.000508531	0.011538		GO:0045177	apical part of cell	cellular_component	0.000274942	0.00554793
GO:0042776	mitochondrial ATP synthesis coupled proton transport	biological_process	0.000521493	0.01177		GO:0015991	ATP hydrolysis coupled proton transport	biological_process	0.000308464	0.00563398
GO:0009141	nucleoside triphosphate metabolic process	biological_process	0.000522838	0.01177		GO:0048384	retinoic acid receptor signaling pathway	biological_process	0.000308464	0.00563398
GO:0007088	regulation of mitotic nuclear division	biological_process	0.000534912	0.0119529		GO:0035337	fatty-acyl-CoA metabolic process	biological_process	0.000310862	0.00565833
GO:0034502	protein localization to chromosome	biological_process	0.000535113	0.0119529		GO:0033218	amide binding	molecular_function	0.0001378	0.00567975
GO:0006403	RNA localization	biological_process	0.000549824	0.0122341		GO:0045860	positive regulation of protein kinase activity	biological_process	0.000313387	0.00568481
GO:0005938	cell cortex	cellular_component	0.001102	0.0122969		GO:0033688	regulation of osteoblast proliferation	biological_process	0.000315146	0.00569728
GO:0016049	cell growth	biological_process	0.000555747	0.0123183		GO:0051231	spindle elongation	biological_process	0.000318187	0.00573276
GO:0042771	intrinsic apoptotic signaling pathway in response to DNA damage by p53 class mediator	biological_process	0.000570806	0.0126037		GO:0010038	response to metal ion	biological_process	0.000326831	0.0058686
GO:0044454	nuclear chromosome part	cellular_component	0.00116096	0.0126066		GO:1903901	negative regulation of viral life cycle	biological_process	0.000334604	0.00598794
GO:0022624	proteasome accessory complex	cellular_component	0.00116562	0.0126066		GO:0001948	glycoprotein binding	molecular_function	0.00016198	0.0063982
GO:0018209	peptidyl-serine modification	biological_process	0.000584094	0.0128392		GO:0072329	monocarboxylic acid catabolic process	biological_process	0.000364249	0.00649659
GO:0090175	regulation of establishment of planar polarity	biological_process	0.000586113	0.0128392		GO:0033047	regulation of mitotic sister chromatid segregation	biological_process	0.000370674	0.00658012
GO:0000226	microtubule cytoskeleton organization	biological_process	0.000588156	0.0128392		GO:1901661	quinone metabolic process	biological_process	0.000371408	0.00658012
GO:0051298	centrosome duplication	biological_process	0.000594604	0.012931		GO:0098589	membrane region	cellular_component	0.000349101	0.00666031
GO:0000723	telomere maintenance	biological_process	0.000611523	0.0132489		GO:0030666	endocytic vesicle membrane	cellular_component	0.000353645	0.00666031
GO:0030522	intracellular receptor signaling pathway	biological_process	0.000628349	0.0135625		GO:0070542	response to fatty acid	biological_process	0.000383675	0.00677486
GO:0005838	proteasome regulatory particle	cellular_component	0.00129248	0.0137669		GO:0045787	positive regulation of cell cycle	biological_process	0.000389606	0.00685681
GO:0031571	mitotic G1 DNA damage checkpoint	biological_process	0.000660287	0.0141459		GO:0050819	negative regulation of coagulation	biological_process	0.000394537	0.00692067
GO:0044819	mitotic G1/S transition checkpoint	biological_process	0.000660287	0.0141459		GO:0044262	cellular carbohydrate metabolic process	biological_process	0.000401894	0.00700477
GO:0030260	entry into host cell	biological_process	0.000672814	0.0141512		GO:0001961	positive regulation of cytokine-mediated signaling pathway	biological_process	0.000401967	0.00700477
GO:0031123	RNA 3'-end processing	biological_process	0.000672814	0.0141512		GO:0031968	organelle outer membrane	cellular_component	0.000392107	0.00714647
GO:0044409	entry into host	biological_process	0.000672814	0.0141512		GO:0051017	actin filament bundle assembly	biological_process	0.000423066	0.00734835
GO:0051806	entry into cell of other organism involved in symbiotic interaction	biological_process	0.000672814	0.0141512		GO:0015988	energy coupled proton transmembrane transport, against electrochemical gradient	biological_process	0.000425679	0.00736966
GO:0051828	entry into other organism involved in symbiotic interaction	biological_process	0.000672814	0.0141512		GO:0010544	negative regulation of platelet activation	biological_process	0.000432795	0.00744436
GO:0061013	regulation of mRNA catabolic process	biological_process	0.000678956	0.0141935		GO:0071371	cellular response to gonadotropin stimulus	biological_process	0.000432795	0.00744436
GO:0042398	cellular modified amino acid biosynthetic process	biological_process	0.00067975	0.0141935		GO:0051304	chromosome separation	biological_process	0.000436341	0.00748114
GO:0005996	monosaccharide metabolic process	biological_process	0.000699506	0.0145078		GO:0032956	regulation of actin cytoskeleton organization	biological_process	0.000453992	0.00775873
GO:0070507	regulation of microtubule cytoskeleton organization	biological_process	0.00069984	0.0145078		GO:0033561	regulation of water loss via skin	biological_process	0.000456023	0.00776847
GO:0072332	intrinsic apoptotic signaling pathway by p53 class mediator	biological_process	0.000704495	0.014552		GO:0043410	positive regulation of MAPK cascade	biological_process	0.000461056	0.00782912
GO:0019079	viral genome replication	biological_process	0.000721495	0.0148499		GO:0002576	platelet degranulation	biological_process	0.000472131	0.00799164
GO:0010508	positive regulation of autophagy	biological_process	0.000735319	0.0150806		GO:0007435	salivary gland morphogenesis	biological_process	0.000489923	0.00826648
GO:0005747	mitochondrial respiratory chain complex I	cellular_component	0.00151876	0.0151449		GO:0034330	cell junction organization	biological_process	0.000494998	0.00832569
GO:0016469	proton-transporting two-sector ATPase complex	cellular_component	0.00151876	0.0151449		GO:0072524	pyridine-containing compound metabolic process	biological_process	0.000500075	0.00836878
GO:0030964	NADH dehydrogenase complex	cellular_component	0.00151876	0.0151449		GO:0007507	heart development	biological_process	0.00050071	0.00836878
GO:0045271	respiratory chain complex I	cellular_component	0.00151876	0.0151449		GO:0019867	outer membrane	cellular_component	0.000474456	0.00837712
GO:0098687	chromosomal region	cellular_component	0.00152957	0.0151449		GO:0031668	cellular response to extracellular stimulus	biological_process	0.000504399	0.00840402
GO:0008026	ATP-dependent helicase activity	molecular_function	0.000358285	0.0153632		GO:0043393	regulation of protein binding	biological_process	0.000507272	0.0084157
GO:0070035	purine NTP-dependent helicase activity	molecular_function	0.000358285	0.0153632		GO:0030071	regulation of mitotic metaphase/anaphase transition	biological_process	0.00050985	0.0084157
GO:0032550	purine ribonucleoside binding	molecular_function	0.000374086	0.0154239		GO:1902099	regulation of metaphase/anaphase transition of cell cycle	biological_process	0.00050985	0.0084157
GO:0007264	small GTPase mediated signal transduction	biological_process	0.000772896	0.015795		GO:0004497	monooxygenase activity	molecular_function	0.000222544	0.00843886
GO:0051409	response to nitrosative stress	biological_process	0.000776011	0.0158027		GO:0007492	endoderm development	biological_process	0.000516539	0.00849971
GO:0031023	microtubule organizing center organization	biological_process	0.000786125	0.0159057		GO:0051225	spindle assembly	biological_process	0.000524663	0.00860674
GO:0060071	Wnt signaling pathway, planar cell polarity pathway	biological_process	0.000789212	0.0159057		GO:1902903	regulation of supramolecular fiber organization	biological_process	0.000529808	0.0086644
GO:0018394	peptidyl-lysine acetylation	biological_process	0.000790739	0.0159057		GO:0042574	retinal metabolic process	biological_process	0.000545559	0.00885793
GO:0043414	macromolecule methylation	biological_process	0.000792112	0.0159057		GO:0033209	tumor necrosis factor-mediated signaling pathway	biological_process	0.00054577	0.00885793
GO:0003713	transcription coactivator activity	molecular_function	0.000425769	0.0160164		GO:0097191	extrinsic apoptotic signaling pathway	biological_process	0.000546642	0.00885793
GO:0016796	exonuclease activity, active with either ribo- or deoxyribonucleic acids and producing 5'-phosphomonoesters	molecular_function	0.000435533	0.0160164		GO:0046822	regulation of nucleocytoplasmic transport	biological_process	0.000552632	0.00892778
GO:0016746	transferase activity, transferring acyl groups	molecular_function	0.000445743	0.0160164		GO:0097529	myeloid leukocyte migration	biological_process	0.000560533	0.00902798
GO:0030291	protein serine/threonine kinase inhibitor activity	molecular_function	0.000448219	0.0160164		GO:1902904	negative regulation of supramolecular fiber organization	biological_process	0.000562587	0.00903369
GO:0006415	translational termination	biological_process	0.000809779	0.0161969		GO:0006007	glucose catabolic process	biological_process	0.000577184	0.00921241
GO:0048199	vesicle targeting, to, from or within Golgi	biological_process	0.000815046	0.0161969		GO:0055023	positive regulation of cardiac muscle tissue growth	biological_process	0.000577184	0.00921241
GO:0090114	COPII-coated vesicle budding	biological_process	0.000815046	0.0161969		GO:0043535	regulation of blood vessel endothelial cell migration	biological_process	0.000594931	0.00943897
GO:0032069	regulation of nuclease activity	biological_process	0.000848197	0.0167978		GO:0071398	cellular response to fatty acid	biological_process	0.000594931	0.00943897
GO:0006469	negative regulation of protein kinase activity	biological_process	0.000859137	0.0169562		GO:0030099	myeloid cell differentiation	biological_process	0.000599463	0.00948258
GO:0000775	chromosome, centromeric region	cellular_component	0.00178717	0.0174497		GO:0061572	actin filament bundle organization	biological_process	0.000602263	0.00949859
GO:0036003	positive regulation of transcription from RNA polymerase II promoter in response to stress	biological_process	0.000907407	0.0178268		GO:0050818	regulation of coagulation	biological_process	0.000615744	0.00968249
GO:0031056	regulation of histone modification	biological_process	0.000909437	0.0178268		GO:0048662	negative regulation of smooth muscle cell proliferation	biological_process	0.000638149	0.0100052
GO:1903313	positive regulation of mRNA metabolic process	biological_process	0.000919909	0.017971		GO:0003779	actin binding	molecular_function	0.000278945	0.0101707
GO:0031346	positive regulation of cell projection organization	biological_process	0.000940463	0.0183104		GO:0072215	regulation of metanephros development	biological_process	0.000652943	0.010207
GO:0003714	transcription corepressor activity	molecular_function	0.000531624	0.0183839		GO:0022853	active ion transmembrane transporter activity	molecular_function	0.000294489	0.0103398
GO:1990204	oxidoreductase complex	cellular_component	0.00192071	0.0184967		GO:0007423	sensory organ development	biological_process	0.000664314	0.0103543
GO:0033613	activating transcription factor binding	molecular_function	0.000552725	0.0185163		GO:0019362	pyridine nucleotide metabolic process	biological_process	0.000669074	0.0103677
GO:0032549	ribonucleoside binding	molecular_function	0.000578263	0.0187848		GO:0046496	nicotinamide nucleotide metabolic process	biological_process	0.000669074	0.0103677
GO:0006839	mitochondrial transport	biological_process	0.000987806	0.0191674		GO:0006733	oxidoreduction coenzyme metabolic process	biological_process	0.000675623	0.0104388
GO:0016311	dephosphorylation	biological_process	0.000997265	0.019286		GO:0007015	actin filament organization	biological_process	0.000689055	0.0106154
GO:0071214	cellular response to abiotic stimulus	biological_process	0.00102268	0.0197115		GO:0016620	oxidoreductase activity, acting on the aldehyde or oxo group of donors, NAD or NADP as acceptor	molecular_function	0.000314171	0.0106369
GO:0030880	RNA polymerase complex	cellular_component	0.00210903	0.0200357		GO:2000117	negative regulation of cysteine-type endopeptidase activity	biological_process	0.000694051	0.0106615
GO:1903573	negative regulation of response to endoplasmic reticulum stress	biological_process	0.00105801	0.0203244		GO:0005902	microvillus	cellular_component	0.000627738	0.0107476
GO:1902275	regulation of chromatin organization	biological_process	0.0010781	0.0206416		GO:0072073	kidney epithelium development	biological_process	0.000724491	0.011097
GO:0035601	protein deacylation	biological_process	0.00109404	0.0208472		GO:1901987	regulation of cell cycle phase transition	biological_process	0.000731182	0.0111673
GO:0071470	cellular response to osmotic stress	biological_process	0.0010997	0.0208472		GO:1901653	cellular response to peptide	biological_process	0.000733665	0.0111732
GO:1902235	regulation of endoplasmic reticulum stress-induced intrinsic apoptotic signaling pathway	biological_process	0.0010997	0.0208472		GO:0005874	microtubule	cellular_component	0.000673248	0.0111878
GO:0045740	positive regulation of DNA replication	biological_process	0.00110616	0.020901		GO:0051346	negative regulation of hydrolase activity	biological_process	0.000740013	0.0112376
GO:0032648	regulation of interferon-beta production	biological_process	0.00111417	0.0209836		GO:1905330	regulation of morphogenesis of an epithelium	biological_process	0.000743062	0.0112518
GO:0090068	positive regulation of cell cycle process	biological_process	0.00112273	0.0210231		GO:0000280	nuclear division	biological_process	0.000765122	0.0115529
GO:0035065	regulation of histone acetylation	biological_process	0.00112631	0.0210231		GO:0045930	negative regulation of mitotic cell cycle	biological_process	0.000770752	0.0115638
GO:0071158	positive regulation of cell cycle arrest	biological_process	0.00112722	0.0210231		GO:0050673	epithelial cell proliferation	biological_process	0.000771638	0.0115638
GO:0003735	structural constituent of ribosome	molecular_function	0.000668631	0.0210815		GO:0009409	response to cold	biological_process	0.000781374	0.0115638
GO:0051297	centrosome organization	biological_process	0.00117955	0.0219282		GO:0030195	negative regulation of blood coagulation	biological_process	0.000781374	0.0115638
GO:0098732	macromolecule deacylation	biological_process	0.00119492	0.0221426		GO:1900047	negative regulation of hemostasis	biological_process	0.000781374	0.0115638
GO:0019080	viral gene expression	biological_process	0.00121299	0.0224054		GO:0014068	positive regulation of phosphatidylinositol 3-kinase signaling	biological_process	0.000785423	0.0115638
GO:0006006	glucose metabolic process	biological_process	0.0012224	0.0224463		GO:0045844	positive regulation of striated muscle tissue development	biological_process	0.000785423	0.0115638
GO:0032508	DNA duplex unwinding	biological_process	0.001223	0.0224463		GO:0048636	positive regulation of muscle organ development	biological_process	0.000785423	0.0115638
GO:1902115	regulation of organelle assembly	biological_process	0.00123644	0.0226078		GO:0050891	multicellular organismal water homeostasis	biological_process	0.000785423	0.0115638
GO:0007568	aging	biological_process	0.00123964	0.0226078		GO:0043236	laminin binding	molecular_function	0.000364872	0.011652
GO:0043516	regulation of DNA damage response, signal transduction by p53 class mediator	biological_process	0.0012615	0.0229041		GO:0044389	ubiquitin-like protein ligase binding	molecular_function	0.00037032	0.011652
GO:0001736	establishment of planar polarity	biological_process	0.00126782	0.0229041		GO:0015238	drug transmembrane transporter activity	molecular_function	0.000381024	0.011652
GO:0007164	establishment of tissue polarity	biological_process	0.00126782	0.0229041		GO:0097530	granulocyte migration	biological_process	0.000795099	0.0116739
GO:1900180	regulation of protein localization to nucleus	biological_process	0.00129057	0.0232423		GO:0070325	lipoprotein particle receptor binding	molecular_function	0.00039612	0.011735
GO:0060547	negative regulation of necrotic cell death	biological_process	0.00132171	0.023729		GO:0060537	muscle tissue development	biological_process	0.000803351	0.0117626
GO:0006369	termination of RNA polymerase II transcription	biological_process	0.00133218	0.0237895		GO:0046164	alcohol catabolic process	biological_process	0.00081888	0.0119298
GO:0007093	mitotic cell cycle checkpoint	biological_process	0.00133333	0.0237895		GO:0031670	cellular response to nutrient	biological_process	0.000821509	0.0119298
GO:0030218	erythrocyte differentiation	biological_process	0.00134772	0.0239719		GO:0043277	apoptotic cell clearance	biological_process	0.000821509	0.0119298
GO:0000785	chromatin	cellular_component	0.00255812	0.0239781		GO:0030139	endocytic vesicle	cellular_component	0.000739699	0.0119409
GO:0000184	nuclear-transcribed mRNA catabolic process, nonsense-mediated decay	biological_process	0.00135941	0.0240467		GO:1990266	neutrophil migration	biological_process	0.00083707	0.0121227
GO:0000186	activation of MAPKK activity	biological_process	0.00136027	0.0240467		GO:0050661	NADP binding	molecular_function	0.000422352	0.012133
GO:0032608	interferon-beta production	biological_process	0.00137793	0.0242378		GO:0000910	cytokinesis	biological_process	0.000844334	0.0121947
GO:0036473	cell death in response to oxidative stress	biological_process	0.00137949	0.0242378		GO:0050727	regulation of inflammatory response	biological_process	0.000861819	0.0124135
GO:0006903	vesicle targeting	biological_process	0.0013931	0.0244025		GO:0051091	positive regulation of sequence-specific DNA binding transcription factor activity	biological_process	0.000872099	0.0125276
GO:0006970	response to osmotic stress	biological_process	0.00143868	0.0250798		GO:0014910	regulation of smooth muscle cell migration	biological_process	0.000875083	0.0125283
GO:0010976	positive regulation of neuron projection development	biological_process	0.00144353	0.0250798		GO:0009404	toxin metabolic process	biological_process	0.000881579	0.0125283
GO:0008286	insulin receptor signaling pathway	biological_process	0.00144482	0.0250798		GO:0009812	flavonoid metabolic process	biological_process	0.000881579	0.0125283
GO:0050792	regulation of viral process	biological_process	0.00145261	0.0251392		GO:0048385	regulation of retinoic acid receptor signaling pathway	biological_process	0.000881579	0.0125283
GO:0006611	protein export from nucleus	biological_process	0.00146985	0.0253615		GO:1903364	positive regulation of cellular protein catabolic process	biological_process	0.000886297	0.0125424
GO:0045454	cell redox homeostasis	biological_process	0.00151376	0.0260412		GO:0033687	osteoblast proliferation	biological_process	0.000889649	0.0125424
GO:1902882	regulation of response to oxidative stress	biological_process	0.00154606	0.0265177		GO:0098801	regulation of renal system process	biological_process	0.000889649	0.0125424
GO:0008637	apoptotic mitochondrial changes	biological_process	0.00155139	0.0265302		GO:0046777	protein autophosphorylation	biological_process	0.000895417	0.0125903
GO:0043903	regulation of symbiosis, encompassing mutualism through parasitism	biological_process	0.00157988	0.0269374		GO:0042542	response to hydrogen peroxide	biological_process	0.000911034	0.0127761
GO:0051783	regulation of nuclear division	biological_process	0.00160341	0.027258		GO:0016529	sarcoplasmic reticulum	cellular_component	0.000821544	0.0128937
GO:0000387	spliceosomal snRNP assembly	biological_process	0.00163417	0.027618		GO:0044259	multicellular organismal macromolecule metabolic process	biological_process	0.000928832	0.0129308
GO:0018023	peptidyl-lysine trimethylation	biological_process	0.00163417	0.027618		GO:0045807	positive regulation of endocytosis	biological_process	0.000928832	0.0129308
GO:0043407	negative regulation of MAP kinase activity	biological_process	0.00164925	0.0277103		GO:1901652	response to peptide	biological_process	0.000929363	0.0129308
GO:1902653	secondary alcohol biosynthetic process	biological_process	0.00164925	0.0277103		GO:1903409	reactive oxygen species biosynthetic process	biological_process	0.000942411	0.0130781
GO:2001251	negative regulation of chromosome organization	biological_process	0.00166178	0.0278396		GO:1901342	regulation of vasculature development	biological_process	0.000945035	0.0130804
GO:0022625	cytosolic large ribosomal subunit	cellular_component	0.00304735	0.028188		GO:0044706	multi-multicellular organism process	biological_process	0.000954511	0.0131428
GO:0034644	cellular response to UV	biological_process	0.0017076	0.0285243		GO:2001234	negative regulation of apoptotic signaling pathway	biological_process	0.000954511	0.0131428
GO:0034968	histone lysine methylation	biological_process	0.0017335	0.0288734		GO:0048146	positive regulation of fibroblast proliferation	biological_process	0.000956962	0.0131428
GO:0001738	morphogenesis of a polarized epithelium	biological_process	0.00175817	0.0291997		GO:0030193	regulation of blood coagulation	biological_process	0.00096614	0.0131544
GO:1903900	regulation of viral life cycle	biological_process	0.00176635	0.0292513		GO:1900046	regulation of hemostasis	biological_process	0.00096614	0.0131544
GO:1903201	regulation of oxidative stress-induced cell death	biological_process	0.00178069	0.0294043		GO:0055024	regulation of cardiac muscle tissue development	biological_process	0.000967435	0.0131544
GO:0004386	helicase activity	molecular_function	0.000978908	0.0299826		GO:1901990	regulation of mitotic cell cycle phase transition	biological_process	0.000967712	0.0131544
GO:0048872	homeostasis of number of cells	biological_process	0.00182767	0.0300939		GO:0045471	response to ethanol	biological_process	0.000979112	0.0132755
GO:1902600	hydrogen ion transmembrane transport	biological_process	0.00187298	0.030752		GO:0043123	positive regulation of I-kappaB kinase/NF-kappaB signaling	biological_process	0.000987811	0.0133593
GO:0007006	mitochondrial membrane organization	biological_process	0.00189373	0.0309032		GO:0043296	apical junction complex	cellular_component	0.000888482	0.0135674
GO:0007098	centrosome cycle	biological_process	0.00189827	0.0309032		GO:0010543	regulation of platelet activation	biological_process	0.00101243	0.0136229
GO:0090263	positive regulation of canonical Wnt signaling pathway	biological_process	0.00189827	0.0309032		GO:0048009	insulin-like growth factor receptor signaling pathway	biological_process	0.00101243	0.0136229
GO:0005798	Golgi-associated vesicle	cellular_component	0.00345397	0.0313466		GO:2001237	negative regulation of extrinsic apoptotic signaling pathway	biological_process	0.00103554	0.0138478
GO:0000428	DNA-directed RNA polymerase complex	cellular_component	0.00347801	0.0313466		GO:0016055	Wnt signaling pathway	biological_process	0.00104087	0.0138478
GO:1901653	cellular response to peptide	biological_process	0.00196546	0.0318801		GO:0006636	unsaturated fatty acid biosynthetic process	biological_process	0.00104602	0.0138478
GO:1904031	positive regulation of cyclin-dependent protein kinase activity	biological_process	0.00196934	0.0318801		GO:0031577	spindle checkpoint	biological_process	0.00104602	0.0138478
GO:0001889	liver development	biological_process	0.00197626	0.0319024		GO:0032371	regulation of sterol transport	biological_process	0.00104602	0.0138478
GO:0006418	tRNA aminoacylation for protein translation	biological_process	0.0019971	0.0321488		GO:0032374	regulation of cholesterol transport	biological_process	0.00104602	0.0138478
GO:0048207	vesicle targeting, rough ER to cis-Golgi	biological_process	0.00204315	0.0327074		GO:0022612	gland morphogenesis	biological_process	0.00104738	0.0138478
GO:0048208	COPII vesicle coating	biological_process	0.00204315	0.0327074		GO:0039530	MDA-5 signaling pathway	biological_process	0.00105025	0.0138513
GO:0097526	spliceosomal tri-snRNP complex	cellular_component	0.00367846	0.0327337		GO:0034329	cell junction assembly	biological_process	0.00105872	0.0139284
GO:1901797	negative regulation of signal transduction by p53 class mediator	biological_process	0.00205651	0.0328302		GO:0043299	leukocyte degranulation	biological_process	0.00107422	0.0140974
GO:0071356	cellular response to tumor necrosis factor	biological_process	0.00207614	0.033052		GO:0007051	spindle organization	biological_process	0.00108354	0.0141544
GO:0038093	Fc receptor signaling pathway	biological_process	0.00208623	0.0331203		GO:0001654	eye development	biological_process	0.00108389	0.0141544
GO:0001701	in utero embryonic development	biological_process	0.00209193	0.0331203		GO:0042594	response to starvation	biological_process	0.00108962	0.0141944
GO:0032392	DNA geometric change	biological_process	0.00210455	0.0331232		GO:0198738	cell-cell signaling by wnt	biological_process	0.00109974	0.0142913
GO:0034504	protein localization to nucleus	biological_process	0.00210736	0.0331232		GO:0051348	negative regulation of transferase activity	biological_process	0.00110898	0.0143429
GO:0016126	sterol biosynthetic process	biological_process	0.0021151	0.0331232		GO:0030574	collagen catabolic process	biological_process	0.00110912	0.0143429
GO:0051492	regulation of stress fiber assembly	biological_process	0.0021151	0.0331232		GO:0001819	positive regulation of cytokine production	biological_process	0.00112225	0.0144425
GO:0006613	cotranslational protein targeting to membrane	biological_process	0.00213007	0.0332671		GO:0031331	positive regulation of cellular catabolic process	biological_process	0.00112225	0.0144425
GO:0001047	core promoter binding	molecular_function	0.00115967	0.0345325		GO:0005788	endoplasmic reticulum lumen	cellular_component	0.000971553	0.0144455
GO:2001235	positive regulation of apoptotic signaling pathway	biological_process	0.00230552	0.0352635		GO:0022804	active transmembrane transporter activity	molecular_function	0.000529361	0.0144487
GO:0008033	tRNA processing	biological_process	0.00230963	0.0352635		GO:0004713	protein tyrosine kinase activity	molecular_function	0.000533442	0.0144487
GO:0006695	cholesterol biosynthetic process	biological_process	0.00232367	0.0352635		GO:0048638	regulation of developmental growth	biological_process	0.00115139	0.0147818
GO:0006901	vesicle coating	biological_process	0.00232367	0.0352635		GO:0044272	sulfur compound biosynthetic process	biological_process	0.00117357	0.0150302
GO:0010257	NADH dehydrogenase complex assembly	biological_process	0.00232367	0.0352635		GO:0032387	negative regulation of intracellular transport	biological_process	0.00117868	0.0150594
GO:0032981	mitochondrial respiratory chain complex I assembly	biological_process	0.00232367	0.0352635		GO:0045185	maintenance of protein location	biological_process	0.00123422	0.0156935
GO:0097031	mitochondrial respiratory chain complex I biogenesis	biological_process	0.00232367	0.0352635		GO:1905039	carboxylic acid transmembrane transport	biological_process	0.00123422	0.0156935
GO:0032200	telomere organization	biological_process	0.0023377	0.0352635		GO:0043010	camera-type eye development	biological_process	0.00124836	0.0158228
GO:0006612	protein targeting to membrane	biological_process	0.00234131	0.0352635		GO:0030330	DNA damage response, signal transduction by p53 class mediator	biological_process	0.00125853	0.0158228
GO:0010565	regulation of cellular ketone metabolic process	biological_process	0.00234633	0.0352635		GO:0032963	collagen metabolic process	biological_process	0.00125853	0.0158228
GO:0006266	DNA ligation	biological_process	0.00235477	0.0352635		GO:0035987	endodermal cell differentiation	biological_process	0.00125928	0.0158228
GO:0008334	histone mRNA metabolic process	biological_process	0.00235477	0.0352635		GO:0071622	regulation of granulocyte chemotaxis	biological_process	0.00125928	0.0158228
GO:0036507	protein demannosylation	biological_process	0.00235477	0.0352635		GO:0098813	nuclear chromosome segregation	biological_process	0.00126926	0.0159107
GO:0036508	protein alpha-1,2-demannosylation	biological_process	0.00235477	0.0352635		GO:0007044	cell-substrate junction assembly	biological_process	0.00128092	0.0159944
GO:0045069	regulation of viral genome replication	biological_process	0.00236015	0.0352635		GO:0071456	cellular response to hypoxia	biological_process	0.00128196	0.0159944
GO:0045070	positive regulation of viral genome replication	biological_process	0.00236192	0.0352635		GO:0009266	response to temperature stimulus	biological_process	0.00130833	0.0161165
GO:0045737	positive regulation of cyclin-dependent protein serine/threonine kinase activity	biological_process	0.00236192	0.0352635		GO:0045765	regulation of angiogenesis	biological_process	0.00130833	0.0161165
GO:0043405	regulation of MAP kinase activity	biological_process	0.0023832	0.0354894		GO:0030104	water homeostasis	biological_process	0.00130889	0.0161165
GO:0006476	protein deacetylation	biological_process	0.00242012	0.0359463		GO:0043901	negative regulation of multi-organism process	biological_process	0.00131226	0.0161165
GO:0031570	DNA integrity checkpoint	biological_process	0.00244094	0.0360696		GO:0070374	positive regulation of ERK1 and ERK2 cascade	biological_process	0.00131226	0.0161165
GO:0032886	regulation of microtubule-based process	biological_process	0.00244094	0.0360696		GO:0006692	prostanoid metabolic process	biological_process	0.00131297	0.0161165
GO:0016050	vesicle organization	biological_process	0.00244974	0.0360921		GO:0006693	prostaglandin metabolic process	biological_process	0.00131297	0.0161165
GO:0032543	mitochondrial translation	biological_process	0.00245499	0.0360921		GO:0007431	salivary gland development	biological_process	0.0013183	0.0161262
GO:2000779	regulation of double-strand break repair	biological_process	0.00246491	0.0361458		GO:0045834	positive regulation of lipid metabolic process	biological_process	0.00132384	0.0161262
GO:0005814	centriole	cellular_component	0.00412932	0.0362864		GO:0034637	cellular carbohydrate biosynthetic process	biological_process	0.00132453	0.0161262
GO:0042149	cellular response to glucose starvation	biological_process	0.00250375	0.0363746		GO:0007009	plasma membrane organization	biological_process	0.0013259	0.0161262
GO:0010510	regulation of acetyl-CoA biosynthetic process from pyruvate	biological_process	0.00251208	0.0363746		GO:0000041	transition metal ion transport	biological_process	0.00133557	0.0161698
GO:0040023	establishment of nucleus localization	biological_process	0.00251208	0.0363746		GO:0045598	regulation of fat cell differentiation	biological_process	0.00133557	0.0161698
GO:0090646	mitochondrial tRNA processing	biological_process	0.00251208	0.0363746		GO:0006855	drug transmembrane transport	biological_process	0.00135248	0.0162436
GO:2000479	regulation of cAMP-dependent protein kinase activity	biological_process	0.00251208	0.0363746		GO:0036499	PERK-mediated unfolded protein response	biological_process	0.00135248	0.0162436
GO:2001021	negative regulation of response to DNA damage stimulus	biological_process	0.00253295	0.0365849		GO:0006000	fructose metabolic process	biological_process	0.00135694	0.0162436
GO:0000276	mitochondrial proton-transporting ATP synthase complex, coupling factor F(o)	cellular_component	0.00423006	0.0367128		GO:0034349	glial cell apoptotic process	biological_process	0.00135694	0.0162436
GO:0034612	response to tumor necrosis factor	biological_process	0.00254846	0.036717		GO:0090177	establishment of planar polarity involved in neural tube closure	biological_process	0.00135694	0.0162436
GO:1990542	mitochondrial transmembrane transport	biological_process	0.00260032	0.0373707		GO:0007160	cell-matrix adhesion	biological_process	0.00139894	0.0167086
GO:0042762	regulation of sulfur metabolic process	biological_process	0.00263119	0.0377203		GO:0071774	response to fibroblast growth factor	biological_process	0.00141136	0.0168192
GO:0055029	nuclear DNA-directed RNA polymerase complex	cellular_component	0.00443641	0.0378218		GO:0009913	epidermal cell differentiation	biological_process	0.00144436	0.0171356
GO:0044322	endoplasmic reticulum quality control compartment	cellular_component	0.00446544	0.0378218		GO:2000027	regulation of organ morphogenesis	biological_process	0.00144436	0.0171356
GO:0046332	SMAD binding	molecular_function	0.00135595	0.0387758		GO:0031032	actomyosin structure organization	biological_process	0.00145017	0.0171398
GO:0003954	NADH dehydrogenase activity	molecular_function	0.00149387	0.0387758		GO:0090068	positive regulation of cell cycle process	biological_process	0.00145116	0.0171398
GO:0004812	aminoacyl-tRNA ligase activity	molecular_function	0.00149387	0.0387758		GO:0045861	negative regulation of proteolysis	biological_process	0.00145587	0.0171573
GO:0016875	ligase activity, forming carbon-oxygen bonds	molecular_function	0.00149387	0.0387758		GO:0071621	granulocyte chemotaxis	biological_process	0.00146836	0.0172662
GO:0016876	ligase activity, forming aminoacyl-tRNA and related compounds	molecular_function	0.00149387	0.0387758		GO:0045216	cell-cell junction organization	biological_process	0.00149187	0.017504
GO:0017048	Rho GTPase binding	molecular_function	0.00154539	0.0387758		GO:1903725	regulation of phospholipid metabolic process	biological_process	0.00149672	0.0175221
GO:0003924	GTPase activity	molecular_function	0.00155537	0.0387758		GO:0015629	actin cytoskeleton	cellular_component	0.00122378	0.0177291
GO:0060070	canonical Wnt signaling pathway	biological_process	0.00279763	0.0397068		GO:0006984	ER-nucleus signaling pathway	biological_process	0.00154333	0.0179492
GO:0032728	positive regulation of interferon-beta production	biological_process	0.0028143	0.0397068		GO:0042743	hydrogen peroxide metabolic process	biological_process	0.00154333	0.0179492
GO:0061008	hepaticobiliary system development	biological_process	0.00281525	0.0397068		GO:0060761	negative regulation of response to cytokine stimulus	biological_process	0.00154333	0.0179492
GO:0000394	RNA splicing, via endonucleolytic cleavage and ligation	biological_process	0.00282867	0.0397068		GO:0032386	regulation of intracellular transport	biological_process	0.00156597	0.0181728
GO:0001522	pseudouridine synthesis	biological_process	0.00282867	0.0397068		GO:0048871	multicellular organismal homeostasis	biological_process	0.001589	0.0183999
GO:1902236	negative regulation of endoplasmic reticulum stress-induced intrinsic apoptotic signaling pathway	biological_process	0.00282867	0.0397068		GO:0006637	acyl-CoA metabolic process	biological_process	0.00159943	0.0184003
GO:1904872	regulation of telomerase RNA localization to Cajal body	biological_process	0.00282867	0.0397068		GO:0009062	fatty acid catabolic process	biological_process	0.00159943	0.0184003
GO:2001236	regulation of extrinsic apoptotic signaling pathway	biological_process	0.00282973	0.0397068		GO:0035383	thioester metabolic process	biological_process	0.00159943	0.0184003
GO:0000963	mitochondrial RNA processing	biological_process	0.00284555	0.0397068		GO:0090383	phagosome acidification	biological_process	0.00160365	0.0184091
GO:1904874	positive regulation of telomerase RNA localization to Cajal body	biological_process	0.00284555	0.0397068		GO:0009055	electron carrier activity	molecular_function	0.000707699	0.0186361
GO:2000105	positive regulation of DNA-dependent DNA replication	biological_process	0.00284555	0.0397068		GO:0006778	porphyrin-containing compound metabolic process	biological_process	0.00164557	0.0188495
GO:0051186	cofactor metabolic process	biological_process	0.00285247	0.0397072		GO:0006898	receptor-mediated endocytosis	biological_process	0.00166275	0.0190054
GO:0044798	nuclear transcription factor complex	cellular_component	0.00477255	0.0399417		GO:0060421	positive regulation of heart growth	biological_process	0.00168141	0.0191579
GO:0000075	cell cycle checkpoint	biological_process	0.00287695	0.0399515		GO:0042063	gliogenesis	biological_process	0.0016833	0.0191579
GO:0044283	small molecule biosynthetic process	biological_process	0.00297109	0.0411595		GO:0001706	endoderm formation	biological_process	0.00169064	0.0192003
GO:0042493	response to drug	biological_process	0.00303917	0.0420017		GO:0044344	cellular response to fibroblast growth factor stimulus	biological_process	0.00170787	0.0193546
GO:0033673	negative regulation of kinase activity	biological_process	0.00309918	0.0427286		GO:0031349	positive regulation of defense response	biological_process	0.00172954	0.0195586
GO:0017069	snRNA binding	molecular_function	0.00175658	0.0427966		GO:0031145	anaphase-promoting complex-dependent catabolic process	biological_process	0.00174299	0.0196688
GO:1901652	response to peptide	biological_process	0.00311874	0.0428956		GO:0070373	negative regulation of ERK1 and ERK2 cascade	biological_process	0.00177156	0.0198196
GO:0048037	cofactor binding	molecular_function	0.00186039	0.0429432		GO:0042119	neutrophil activation	biological_process	0.00177748	0.0198196
GO:0051020	GTPase binding	molecular_function	0.0018719	0.0429432		GO:0002903	negative regulation of B cell apoptotic process	biological_process	0.00178184	0.0198196
GO:0030515	snoRNA binding	molecular_function	0.00188277	0.0429432		GO:0051255	spindle midzone assembly	biological_process	0.00178184	0.0198196
GO:0000245	spliceosomal complex assembly	biological_process	0.00314267	0.0430194		GO:0072160	nephron tubule epithelial cell differentiation	biological_process	0.00178184	0.0198196
GO:0016239	positive regulation of macroautophagy	biological_process	0.00314267	0.0430194		GO:0097242	beta-amyloid clearance	biological_process	0.00178184	0.0198196
GO:0007265	Ras protein signal transduction	biological_process	0.00321266	0.0437305		GO:0051781	positive regulation of cell division	biological_process	0.00178619	0.0198196
GO:0002474	antigen processing and presentation of peptide antigen via MHC class I	biological_process	0.00321738	0.0437305		GO:0090662	ATP hydrolysis coupled transmembrane transport	biological_process	0.00178619	0.0198196
GO:0006614	SRP-dependent cotranslational protein targeting to membrane	biological_process	0.00321738	0.0437305		GO:1903825	organic acid transmembrane transport	biological_process	0.00181386	0.0200847
GO:0051099	positive regulation of binding	biological_process	0.00323452	0.0438601		GO:1903706	regulation of hemopoiesis	biological_process	0.00183259	0.0202499
GO:0005732	small nucleolar ribonucleoprotein complex	cellular_component	0.00536665	0.0443854		GO:0006706	steroid catabolic process	biological_process	0.00187115	0.0205479
GO:0000002	mitochondrial genome maintenance	biological_process	0.00332276	0.0448456		GO:0032462	regulation of protein homooligomerization	biological_process	0.00187115	0.0205479
GO:0043536	positive regulation of blood vessel endothelial cell migration	biological_process	0.00332276	0.0448456		GO:0060445	branching involved in salivary gland morphogenesis	biological_process	0.00187115	0.0205479
GO:0016407	acetyltransferase activity	molecular_function	0.00202932	0.0453215		GO:0006749	glutathione metabolic process	biological_process	0.00187769	0.0205743
GO:0070126	mitochondrial translational termination	biological_process	0.00338392	0.0455112		GO:0031669	cellular response to nutrient levels	biological_process	0.0018813	0.0205743
GO:0043254	regulation of protein complex assembly	biological_process	0.00338787	0.0455112		GO:0061448	connective tissue development	biological_process	0.00194758	0.0212555
GO:0000922	spindle pole	cellular_component	0.0055818	0.0456279		GO:0030038	contractile actin filament bundle assembly	biological_process	0.00199881	0.0217082
GO:0018022	peptidyl-lysine methylation	biological_process	0.00343323	0.0460133		GO:0043149	stress fiber assembly	biological_process	0.00199881	0.0217082
GO:0019216	regulation of lipid metabolic process	biological_process	0.00344152	0.0460173		GO:0043651	linoleic acid metabolic process	biological_process	0.0020054	0.0217082
GO:0005913	cell-cell adherens junction	cellular_component	0.0057832	0.0461999		GO:0048569	post-embryonic animal organ development	biological_process	0.0020054	0.0217082
GO:0031970	organelle envelope lumen	cellular_component	0.0057832	0.0461999		GO:0033627	cell adhesion mediated by integrin	biological_process	0.00201935	0.0217705
GO:0071375	cellular response to peptide hormone stimulus	biological_process	0.00348464	0.0464861		GO:0034308	primary alcohol metabolic process	biological_process	0.00201935	0.0217705
GO:0051721	protein phosphatase 2A binding	molecular_function	0.0021824	0.0471546		GO:0003044	regulation of systemic arterial blood pressure mediated by a chemical signal	biological_process	0.00203561	0.0218131
GO:0019001	guanyl nucleotide binding	molecular_function	0.00219938	0.0471546		GO:0055025	positive regulation of cardiac muscle tissue development	biological_process	0.00203561	0.0218131
GO:0030177	positive regulation of Wnt signaling pathway	biological_process	0.00356661	0.0474697		GO:2000107	negative regulation of leukocyte apoptotic process	biological_process	0.00203561	0.0218131
GO:0006119	oxidative phosphorylation	biological_process	0.0036407	0.0483442		GO:0022407	regulation of cell-cell adhesion	biological_process	0.002041	0.0218268
GO:0030261	chromosome condensation	biological_process	0.00368485	0.0487059		GO:0008637	apoptotic mitochondrial changes	biological_process	0.00206722	0.0219677
GO:0042407	cristae formation	biological_process	0.00368485	0.0487059		GO:0042770	signal transduction in response to DNA damage	biological_process	0.00206722	0.0219677
GO:0034332	adherens junction organization	biological_process	0.00370619	0.0487643		GO:0036230	granulocyte activation	biological_process	0.00207374	0.0219677
GO:0044774	mitotic DNA integrity checkpoint	biological_process	0.00370619	0.0487643		GO:0043406	positive regulation of MAP kinase activity	biological_process	0.0020739	0.0219677
GO:0005667	transcription factor complex	cellular_component	0.00622479	0.0490534		GO:0002283	neutrophil activation involved in immune response	biological_process	0.0020913	0.0219677
GO:0030684	preribosome	cellular_component	0.00628695	0.0490534		GO:0043312	neutrophil degranulation	biological_process	0.0020913	0.0219677
GO:0005685	U1 snRNP	cellular_component	0.00634972	0.0490534		GO:0033045	regulation of sister chromatid segregation	biological_process	0.00209649	0.0219677
GO:1900408	negative regulation of cellular response to oxidative stress	biological_process	0.00375671	0.0492044		GO:0015893	drug transport	biological_process	0.00209964	0.0219677
GO:1903202	negative regulation of oxidative stress-induced cell death	biological_process	0.00375671	0.0492044		GO:0046596	regulation of viral entry into host cell	biological_process	0.00209964	0.0219677
GO:0019083	viral transcription	biological_process	0.00383236	0.0500814		GO:0060512	prostate gland morphogenesis	biological_process	0.00209964	0.0219677
GO:0050779	RNA destabilization	biological_process	0.00387129	0.0503617		GO:1902624	positive regulation of neutrophil migration	biological_process	0.00209964	0.0219677
GO:0070199	establishment of protein localization to chromosome	biological_process	0.00387129	0.0503617		GO:0048771	tissue remodeling	biological_process	0.00210796	0.0220114
GO:0003730	mRNA 3'-UTR binding	molecular_function	0.00240456	0.050543		GO:0000778	condensed nuclear chromosome kinetochore	cellular_component	0.00157966	0.0220751
GO:0043039	tRNA aminoacylation	biological_process	0.00390257	0.0506543		GO:0000780	condensed nuclear chromosome, centromeric region	cellular_component	0.00160191	0.0220751
GO:0031124	mRNA 3'-end processing	biological_process	0.00395501	0.0511047		GO:0017144	drug metabolic process	biological_process	0.00212822	0.0220904
GO:1902750	negative regulation of cell cycle G2/M phase transition	biological_process	0.00395501	0.0511047		GO:0061614	pri-miRNA transcription from RNA polymerase II promoter	biological_process	0.00212822	0.0220904
GO:0031461	cullin-RING ubiquitin ligase complex	cellular_component	0.00683699	0.0512077		GO:1902622	regulation of neutrophil migration	biological_process	0.00212822	0.0220904
GO:0005844	polysome	cellular_component	0.00684712	0.0512077		GO:0010565	regulation of cellular ketone metabolic process	biological_process	0.00213215	0.0220904
GO:0030660	Golgi-associated vesicle membrane	cellular_component	0.00684712	0.0512077		GO:0071453	cellular response to oxygen levels	biological_process	0.00217599	0.0225007
GO:0045598	regulation of fat cell differentiation	biological_process	0.00398216	0.0513404		GO:0048037	cofactor binding	molecular_function	0.00088833	0.0226137
GO:0032561	guanyl ribonucleotide binding	molecular_function	0.00257248	0.0518096		GO:0072341	modified amino acid binding	molecular_function	0.000906457	0.0226137
GO:0015078	hydrogen ion transmembrane transporter activity	molecular_function	0.00257926	0.0518096		GO:0035239	tube morphogenesis	biological_process	0.00224474	0.0231666
GO:0051787	misfolded protein binding	molecular_function	0.00260981	0.0518096		GO:0090066	regulation of anatomical structure size	biological_process	0.00226419	0.023322
GO:0001558	regulation of cell growth	biological_process	0.00403005	0.0518419		GO:0051452	intracellular pH reduction	biological_process	0.00226871	0.0233234
GO:0033045	regulation of sister chromatid segregation	biological_process	0.00405043	0.0519637		GO:0006606	protein import into nucleus	biological_process	0.00229468	0.0234995
GO:1990778	protein localization to cell periphery	biological_process	0.00405755	0.0519637		GO:0044744	protein targeting to nucleus	biological_process	0.00229468	0.0234995
GO:0032451	demethylase activity	molecular_function	0.00268154	0.0522183		GO:0050840	extracellular matrix binding	molecular_function	0.000971233	0.0236084
GO:0019200	carbohydrate kinase activity	molecular_function	0.002769	0.0522183		GO:0036294	cellular response to decreased oxygen levels	biological_process	0.00231383	0.0236177
GO:0047485	protein N-terminus binding	molecular_function	0.00277653	0.0522183		GO:0042306	regulation of protein import into nucleus	biological_process	0.00231511	0.0236177
GO:0051607	defense response to virus	biological_process	0.00410441	0.0524473		GO:0008017	microtubule binding	molecular_function	0.0010048	0.0238138
GO:0004004	ATP-dependent RNA helicase activity	molecular_function	0.00287325	0.0525118		GO:0030424	axon	cellular_component	0.00177403	0.023865
GO:0004529	exodeoxyribonuclease activity	molecular_function	0.00296424	0.0525118		GO:0045178	basal part of cell	cellular_component	0.00183536	0.0241158
GO:0016895	exodeoxyribonuclease activity, producing 5'-phosphomonoesters	molecular_function	0.00296424	0.0525118		GO:0005905	clathrin-coated pit	cellular_component	0.00189845	0.0243778
GO:0097718	disordered domain specific binding	molecular_function	0.00298808	0.0525118		GO:0001540	beta-amyloid binding	molecular_function	0.00106248	0.0245665
GO:0007009	plasma membrane organization	biological_process	0.00414073	0.0527943		GO:0060562	epithelial tube morphogenesis	biological_process	0.00242935	0.0246802
GO:0007015	actin filament organization	biological_process	0.00416507	0.0529875		GO:0030593	neutrophil chemotaxis	biological_process	0.00243319	0.0246802
GO:0043202	lysosomal lumen	cellular_component	0.00719624	0.0530582		GO:0046209	nitric oxide metabolic process	biological_process	0.00243319	0.0246802
GO:0080008	Cul4-RING E3 ubiquitin ligase complex	cellular_component	0.00728933	0.0530582		GO:1904035	regulation of epithelial cell apoptotic process	biological_process	0.00244673	0.0247702
GO:0019908	nuclear cyclin-dependent protein kinase holoenzyme complex	cellular_component	0.00732098	0.0530582		GO:0004601	peroxidase activity	molecular_function	0.00112495	0.0249433
GO:0046165	alcohol biosynthetic process	biological_process	0.00418431	0.053114		GO:0015631	tubulin binding	molecular_function	0.00118311	0.0249433
GO:0048732	gland development	biological_process	0.00419346	0.053114		GO:0050750	low-density lipoprotein particle receptor binding	molecular_function	0.00119679	0.0249433
GO:0000819	sister chromatid segregation	biological_process	0.00420645	0.0531583		GO:0004866	endopeptidase inhibitor activity	molecular_function	0.0012006	0.0249433
GO:0000077	DNA damage checkpoint	biological_process	0.0042154	0.0531583		GO:0004029	aldehyde dehydrogenase (NAD) activity	molecular_function	0.00121706	0.0249433
GO:0051225	spindle assembly	biological_process	0.00425396	0.0535275		GO:0050662	coenzyme binding	molecular_function	0.00123664	0.0249433
GO:0000466	maturation of 5.8S rRNA from tricistronic rRNA transcript (SSU-rRNA, 5.8S rRNA, LSU-rRNA)	biological_process	0.00442039	0.0552517		GO:0001960	negative regulation of cytokine-mediated signaling pathway	biological_process	0.00249681	0.0251813
GO:0071168	protein localization to chromatin	biological_process	0.00442039	0.0552517		GO:0090382	phagosome maturation	biological_process	0.00249681	0.0251813
GO:1904380	endoplasmic reticulum mannose trimming	biological_process	0.00442039	0.0552517		GO:0001783	B cell apoptotic process	biological_process	0.00253154	0.0253323
GO:0071108	protein K48-linked deubiquitination	biological_process	0.00444155	0.0552517		GO:0019430	removal of superoxide radicals	biological_process	0.00253154	0.0253323
GO:0072659	protein localization to plasma membrane	biological_process	0.00445745	0.0552517		GO:0042554	superoxide anion generation	biological_process	0.00253154	0.0253323
GO:0009127	purine nucleoside monophosphate biosynthetic process	biological_process	0.00447684	0.0552517		GO:0061082	myeloid leukocyte cytokine production	biological_process	0.00253154	0.0253323
GO:0009168	purine ribonucleoside monophosphate biosynthetic process	biological_process	0.00447684	0.0552517		GO:0002446	neutrophil mediated immunity	biological_process	0.00253561	0.0253323
GO:1900407	regulation of cellular response to oxidative stress	biological_process	0.00447684	0.0552517		GO:0010770	positive regulation of cell morphogenesis involved in differentiation	biological_process	0.00258486	0.0257758
GO:0006261	DNA-dependent DNA replication	biological_process	0.00447728	0.0552517		GO:0010720	positive regulation of cell development	biological_process	0.00265149	0.0263907
GO:0008137	NADH dehydrogenase (ubiquinone) activity	molecular_function	0.0032751	0.0557287		GO:0008207	C21-steroid hormone metabolic process	biological_process	0.00266464	0.0264721
GO:0050136	NADH dehydrogenase (quinone) activity	molecular_function	0.0032751	0.0557287		GO:0071276	cellular response to cadmium ion	biological_process	0.00270862	0.0266686
GO:0046718	viral entry into host cell	biological_process	0.00452747	0.0557517		GO:0061458	reproductive system development	biological_process	0.00270869	0.0266686
GO:0005687	U4 snRNP	cellular_component	0.00803307	0.0566219		GO:1901654	response to ketone	biological_process	0.00271107	0.0266686
GO:0000177	cytoplasmic exosome (RNase complex)	cellular_component	0.00805433	0.0566219		GO:0034101	erythrocyte homeostasis	biological_process	0.00271359	0.0266686
GO:0045263	proton-transporting ATP synthase complex, coupling factor F(o)	cellular_component	0.00805433	0.0566219		GO:0051090	regulation of sequence-specific DNA binding transcription factor activity	biological_process	0.00272309	0.0266686
GO:0016055	Wnt signaling pathway	biological_process	0.00461754	0.0567396		GO:0045851	pH reduction	biological_process	0.00272317	0.0266686
GO:0007007	inner mitochondrial membrane organization	biological_process	0.00463815	0.0567512		GO:0090303	positive regulation of wound healing	biological_process	0.00272317	0.0266686
GO:0071417	cellular response to organonitrogen compound	biological_process	0.00463818	0.0567512		GO:0019319	hexose biosynthetic process	biological_process	0.00272456	0.0266686
GO:0002758	innate immune response-activating signal transduction	biological_process	0.00465597	0.0567615		GO:1902593	single-organism nuclear import	biological_process	0.00281139	0.0271263
GO:0030865	cortical cytoskeleton organization	biological_process	0.00465872	0.0567615		GO:0051492	regulation of stress fiber assembly	biological_process	0.0028132	0.0271263
GO:0005720	nuclear heterochromatin	cellular_component	0.0082997	0.0569256		GO:0002693	positive regulation of cellular extravasation	biological_process	0.0028273	0.0271263
GO:0005881	cytoplasmic microtubule	cellular_component	0.00861347	0.0569256		GO:0014067	negative regulation of phosphatidylinositol 3-kinase signaling	biological_process	0.0028273	0.0271263
GO:0030120	vesicle coat	cellular_component	0.00861347	0.0569256		GO:0032928	regulation of superoxide anion generation	biological_process	0.0028273	0.0271263
GO:0030173	integral component of Golgi membrane	cellular_component	0.00866556	0.0569256		GO:0070493	thrombin-activated receptor signaling pathway	biological_process	0.0028273	0.0271263
GO:0000159	protein phosphatase type 2A complex	cellular_component	0.00874533	0.0569256		GO:0097286	iron ion import	biological_process	0.0028273	0.0271263
GO:0000178	exosome (RNase complex)	cellular_component	0.00874533	0.0569256		GO:2001028	positive regulation of endothelial cell chemotaxis	biological_process	0.0028273	0.0271263
GO:0005682	U5 snRNP	cellular_component	0.00874533	0.0569256		GO:0014823	response to activity	biological_process	0.00283386	0.0271263
GO:1905354	exoribonuclease complex	cellular_component	0.00874533	0.0569256		GO:1902041	regulation of extrinsic apoptotic signaling pathway via death domain receptors	biological_process	0.00283386	0.0271263
GO:0043619	regulation of transcription from RNA polymerase II promoter in response to oxidative stress	biological_process	0.00474573	0.0569785		GO:1903036	positive regulation of response to wounding	biological_process	0.00283386	0.0271263
GO:0055089	fatty acid homeostasis	biological_process	0.00474573	0.0569785		GO:0002902	regulation of B cell apoptotic process	biological_process	0.00286319	0.0271263
GO:0060211	regulation of nuclear-transcribed mRNA poly(A) tail shortening	biological_process	0.00474573	0.0569785		GO:0032354	response to follicle-stimulating hormone	biological_process	0.00286319	0.0271263
GO:0060213	positive regulation of nuclear-transcribed mRNA poly(A) tail shortening	biological_process	0.00474573	0.0569785		GO:0042249	establishment of planar polarity of embryonic epithelium	biological_process	0.00286319	0.0271263
GO:0070254	mucus secretion	biological_process	0.00474573	0.0569785		GO:0071498	cellular response to fluid shear stress	biological_process	0.00286319	0.0271263
GO:0090161	Golgi ribbon formation	biological_process	0.00474573	0.0569785		GO:0090330	regulation of platelet aggregation	biological_process	0.00286319	0.0271263
GO:0097242	beta-amyloid clearance	biological_process	0.00474573	0.0569785		GO:1905276	regulation of epithelial tube formation	biological_process	0.00286319	0.0271263
GO:0030686	90S preribosome	cellular_component	0.00885812	0.0571308		GO:2001026	regulation of endothelial cell chemotaxis	biological_process	0.00286319	0.0271263
GO:0000790	nuclear chromatin	cellular_component	0.00894502	0.0571668		GO:0043434	response to peptide hormone	biological_process	0.00287717	0.0272013
GO:0016667	oxidoreductase activity, acting on a sulfur group of donors	molecular_function	0.00341415	0.057187		GO:0034504	protein localization to nucleus	biological_process	0.00288135	0.0272013
GO:0032535	regulation of cellular component size	biological_process	0.00478657	0.0573493		GO:0015175	neutral amino acid transmembrane transporter activity	molecular_function	0.0014026	0.0277014
GO:0005689	U12-type spliceosomal complex	cellular_component	0.00910252	0.0576493		GO:0042379	chemokine receptor binding	molecular_function	0.00145378	0.0280768
GO:1903706	regulation of hemopoiesis	biological_process	0.00483671	0.0578298		GO:0031625	ubiquitin protein ligase binding	molecular_function	0.0015545	0.0280768
GO:0000422	mitophagy	biological_process	0.00486247	0.0578976		GO:0030674	protein binding, bridging	molecular_function	0.00158279	0.0280768
GO:0061726	mitochondrion disassembly	biological_process	0.00486247	0.0578976		GO:0030169	low-density lipoprotein particle binding	molecular_function	0.00162287	0.0280768
GO:0000185	activation of MAPKKK activity	biological_process	0.00488611	0.0579396		GO:0048407	platelet-derived growth factor binding	molecular_function	0.00162287	0.0280768
GO:1904355	positive regulation of telomere capping	biological_process	0.00488611	0.0579396		GO:0019200	carbohydrate kinase activity	molecular_function	0.00165855	0.0280768
GO:0045666	positive regulation of neuron differentiation	biological_process	0.00490692	0.0580668		GO:0046961	proton-transporting ATPase activity, rotational mechanism	molecular_function	0.00165855	0.0280768
GO:0004527	exonuclease activity	molecular_function	0.00354224	0.0584197		GO:0090484	drug transporter activity	molecular_function	0.00165855	0.0280768
GO:0045860	positive regulation of protein kinase activity	biological_process	0.00504816	0.0595165		GO:1904589	regulation of protein import	biological_process	0.00301612	0.0284232
GO:0043542	endothelial cell migration	biological_process	0.00505008	0.0595165		GO:1905207	regulation of cardiocyte differentiation	biological_process	0.00303808	0.0285794
GO:0030323	respiratory tube development	biological_process	0.00507708	0.0597127		GO:0008015	blood circulation	biological_process	0.00306733	0.0288036
GO:0006353	DNA-templated transcription, termination	biological_process	0.00509831	0.0597475		GO:0008361	regulation of cell size	biological_process	0.00311335	0.0291037
GO:0006302	double-strand break repair	biological_process	0.00511114	0.0597475		GO:0035567	non-canonical Wnt signaling pathway	biological_process	0.00311335	0.0291037
GO:0097191	extrinsic apoptotic signaling pathway	biological_process	0.00511114	0.0597475		GO:0051897	positive regulation of protein kinase B signaling	biological_process	0.00311571	0.0291037
GO:0009156	ribonucleoside monophosphate biosynthetic process	biological_process	0.0051414	0.0599796		GO:0043627	response to estrogen	biological_process	0.00324058	0.0301641
GO:0016853	isomerase activity	molecular_function	0.00371738	0.060174		GO:0044243	multicellular organismal catabolic process	biological_process	0.00324058	0.0301641
GO:0017016	Ras GTPase binding	molecular_function	0.00376087	0.060174		GO:0009617	response to bacterium	biological_process	0.00325681	0.0302621
GO:0010501	RNA secondary structure unwinding	biological_process	0.00522879	0.0608758		GO:1900180	regulation of protein localization to nucleus	biological_process	0.00330531	0.0306592
GO:0007623	circadian rhythm	biological_process	0.00525536	0.0610618		GO:0006735	NADH regeneration	biological_process	0.00335737	0.0308194
GO:0006732	coenzyme metabolic process	biological_process	0.00530784	0.0615475		GO:0034110	regulation of homotypic cell-cell adhesion	biological_process	0.00335737	0.0308194
GO:0198738	cell-cell signaling by wnt	biological_process	0.00533728	0.0617646		GO:0055094	response to lipoprotein particle	biological_process	0.00335737	0.0308194
GO:0004722	protein serine/threonine phosphatase activity	molecular_function	0.00397699	0.0626961		GO:0061621	canonical glycolysis	biological_process	0.00335737	0.0308194
GO:0043434	response to peptide hormone	biological_process	0.00550584	0.0635875		GO:0061718	glucose catabolic process to pyruvate	biological_process	0.00335737	0.0308194
GO:0006120	mitochondrial electron transport, NADH to ubiquinone	biological_process	0.00552948	0.0636032		GO:0090322	regulation of superoxide metabolic process	biological_process	0.00335737	0.0308194
GO:0043535	regulation of blood vessel endothelial cell migration	biological_process	0.00552948	0.0636032		GO:0005741	mitochondrial outer membrane	cellular_component	0.00250011	0.0308502
GO:0061647	histone H3-K9 modification	biological_process	0.00554031	0.0636032		GO:0000940	condensed chromosome outer kinetochore	cellular_component	0.0025117	0.0308502
GO:0046822	regulation of nucleocytoplasmic transport	biological_process	0.00555684	0.0636661		GO:0060071	Wnt signaling pathway, planar cell polarity pathway	biological_process	0.0033796	0.0309699
GO:0022604	regulation of cell morphogenesis	biological_process	0.00556825	0.0636703		GO:0030168	platelet activation	biological_process	0.00340866	0.0311825
GO:0003281	ventricular septum development	biological_process	0.00561536	0.0640818		GO:0015804	neutral amino acid transport	biological_process	0.00344711	0.0313722
GO:0000291	nuclear-transcribed mRNA catabolic process, exonucleolytic	biological_process	0.00572567	0.0649548		GO:0071173	spindle assembly checkpoint	biological_process	0.00344711	0.0313722
GO:0009225	nucleotide-sugar metabolic process	biological_process	0.00572567	0.0649548		GO:1905517	macrophage migration	biological_process	0.00344711	0.0313722
GO:0090503	RNA phosphodiester bond hydrolysis, exonucleolytic	biological_process	0.00572567	0.0649548		GO:0048608	reproductive structure development	biological_process	0.00356147	0.0323576
GO:0004402	histone acetyltransferase activity	molecular_function	0.00422277	0.0656059		GO:0007265	Ras protein signal transduction	biological_process	0.00360428	0.0326907
GO:0030134	ER to Golgi transport vesicle	cellular_component	0.0104708	0.0657232		GO:0007059	chromosome segregation	biological_process	0.0036121	0.0327058
GO:0005666	DNA-directed RNA polymerase III complex	cellular_component	0.0105675	0.0657427		GO:0051015	actin filament binding	molecular_function	0.00197152	0.0327895
GO:2000379	positive regulation of reactive oxygen species metabolic process	biological_process	0.00585288	0.0661694		GO:0001618	virus receptor activity	molecular_function	0.00200629	0.0327924
GO:0033674	positive regulation of kinase activity	biological_process	0.00586323	0.0661694		GO:0001954	positive regulation of cell-matrix adhesion	biological_process	0.00366884	0.0331068
GO:0051236	establishment of RNA localization	biological_process	0.00586718	0.0661694		GO:0098586	cellular response to virus	biological_process	0.00366884	0.0331068
GO:0030133	transport vesicle	cellular_component	0.0108772	0.0667751		GO:0016684	oxidoreductase activity, acting on peroxide as acceptor	molecular_function	0.00214172	0.0332937
GO:0005874	microtubule	cellular_component	0.0109234	0.0667751		GO:0030414	peptidase inhibitor activity	molecular_function	0.00216813	0.0332937
GO:0003724	RNA helicase activity	molecular_function	0.0044249	0.0668098		GO:0061135	endopeptidase regulator activity	molecular_function	0.00216813	0.0332937
GO:0008186	RNA-dependent ATPase activity	molecular_function	0.0044249	0.0668098		GO:0019199	transmembrane receptor protein kinase activity	molecular_function	0.00222971	0.0332937
GO:0034330	cell junction organization	biological_process	0.00594448	0.0669103		GO:0033764	steroid dehydrogenase activity, acting on the CH-OH group of donors, NAD or NADP as acceptor	molecular_function	0.00224768	0.0332937
GO:0022626	cytosolic ribosome	cellular_component	0.0110547	0.0669953		GO:0036442	hydrogen-exporting ATPase activity	molecular_function	0.00224768	0.0332937
GO:0070125	mitochondrial translational elongation	biological_process	0.00597907	0.0669974		GO:2001057	reactive nitrogen species metabolic process	biological_process	0.0037196	0.0335079
GO:0033157	regulation of intracellular protein transport	biological_process	0.00597982	0.0669974		GO:0003013	circulatory system process	biological_process	0.00374465	0.0336765
GO:0022904	respiratory electron transport chain	biological_process	0.00599723	0.0669974		GO:0090175	regulation of establishment of planar polarity	biological_process	0.00376047	0.0337617
GO:0002218	activation of innate immune response	biological_process	0.0060126	0.0669974		GO:0004714	transmembrane receptor protein tyrosine kinase activity	molecular_function	0.00238119	0.034032
GO:1902903	regulation of supramolecular fiber organization	biological_process	0.00601622	0.0669974		GO:0033293	monocarboxylic acid binding	molecular_function	0.00238503	0.034032
GO:0070265	necrotic cell death	biological_process	0.00603626	0.0669974		GO:0019955	cytokine binding	molecular_function	0.00240521	0.034032
GO:0042119	neutrophil activation	biological_process	0.00603826	0.0669974		GO:0048592	eye morphogenesis	biological_process	0.00381487	0.0341923
GO:0050821	protein stabilization	biological_process	0.00604522	0.0669974		GO:0006809	nitric oxide biosynthetic process	biological_process	0.00384222	0.0342898
GO:0010631	epithelial cell migration	biological_process	0.00607808	0.0672321		GO:0014909	smooth muscle cell migration	biological_process	0.00384222	0.0342898
GO:0002181	cytoplasmic translation	biological_process	0.00609249	0.0672624		GO:0032781	positive regulation of ATPase activity	biological_process	0.00385155	0.0342898
GO:0016706	oxidoreductase activity, acting on paired donors, with incorporation or reduction of molecular oxygen, 2-oxoglutarate as one donor, and incorporation of one atom each of oxygen into both donors	molecular_function	0.0045335	0.0674988		GO:0055021	regulation of cardiac muscle tissue growth	biological_process	0.00385155	0.0342898
GO:0030137	COPI-coated vesicle	cellular_component	0.0113426	0.0675748		GO:0061138	morphogenesis of a branching epithelium	biological_process	0.00388913	0.0345664
GO:0033177	proton-transporting two-sector ATPase complex, proton-transporting domain	cellular_component	0.0113426	0.0675748		GO:0061134	peptidase regulator activity	molecular_function	0.00252691	0.0348482
GO:0036230	granulocyte activation	biological_process	0.00615306	0.0678013		GO:0008144	drug binding	molecular_function	0.00253642	0.0348482
GO:0061631	ubiquitin conjugating enzyme activity	molecular_function	0.00469874	0.0678469		GO:0034185	apolipoprotein binding	molecular_function	0.00257657	0.0348941
GO:0005080	protein kinase C binding	molecular_function	0.00479121	0.0678469		GO:0045637	regulation of myeloid cell differentiation	biological_process	0.00395518	0.0350868
GO:0061733	peptide-lysine-N-acetyltransferase activity	molecular_function	0.00481232	0.0678469		GO:0002691	regulation of cellular extravasation	biological_process	0.00396831	0.0350868
GO:0004312	fatty acid synthase activity	molecular_function	0.00491213	0.0678469		GO:1902307	positive regulation of sodium ion transmembrane transport	biological_process	0.00396831	0.0350868
GO:0034212	peptide N-acetyltransferase activity	molecular_function	0.00491657	0.0678469		GO:0019395	fatty acid oxidation	biological_process	0.00397409	0.0350868
GO:0019783	ubiquitin-like protein-specific protease activity	molecular_function	0.00496414	0.0678469		GO:0006734	NADH metabolic process	biological_process	0.00405485	0.0356224
GO:0051082	unfolded protein binding	molecular_function	0.00504656	0.0678469		GO:0033046	negative regulation of sister chromatid segregation	biological_process	0.00405485	0.0356224
GO:0016791	phosphatase activity	molecular_function	0.0050632	0.0678469		GO:0051985	negative regulation of chromosome segregation	biological_process	0.00405485	0.0356224
GO:0015931	nucleobase-containing compound transport	biological_process	0.00621928	0.06827		GO:0043409	negative regulation of MAPK cascade	biological_process	0.0040703	0.0356991
GO:0060828	regulation of canonical Wnt signaling pathway	biological_process	0.00621928	0.06827		GO:0032868	response to insulin	biological_process	0.00415684	0.036398
GO:0043038	amino acid activation	biological_process	0.00624108	0.068379		GO:0031252	cell leading edge	cellular_component	0.00304668	0.036625
GO:0033209	tumor necrosis factor-mediated signaling pathway	biological_process	0.00625659	0.0684188		GO:0038061	NIK/NF-kappaB signaling	biological_process	0.00421292	0.0367106
GO:0022900	electron transport chain	biological_process	0.00630708	0.0688404		GO:0032802	low-density lipoprotein particle receptor catabolic process	biological_process	0.00425339	0.0367106
GO:0033108	mitochondrial respiratory chain complex assembly	biological_process	0.00635837	0.0690081		GO:0036109	alpha-linolenic acid metabolic process	biological_process	0.00425339	0.0367106
GO:0042775	mitochondrial ATP synthesis coupled electron transport	biological_process	0.00635837	0.0690081		GO:0043650	dicarboxylic acid biosynthetic process	biological_process	0.00425339	0.0367106
GO:0097711	ciliary basal body docking	biological_process	0.00635837	0.0690081		GO:0050665	hydrogen peroxide biosynthetic process	biological_process	0.00425339	0.0367106
GO:0030307	positive regulation of cell growth	biological_process	0.00645398	0.0699141		GO:0090179	planar cell polarity pathway involved in neural tube closure	biological_process	0.00425339	0.0367106
GO:0070534	protein K63-linked ubiquitination	biological_process	0.00650321	0.0701835		GO:1990000	amyloid fibril formation	biological_process	0.00425339	0.0367106
GO:1902883	negative regulation of response to oxidative stress	biological_process	0.00650321	0.0701835		GO:2000651	positive regulation of sodium ion transmembrane transporter activity	biological_process	0.00425339	0.0367106
GO:0050780	dopamine receptor binding	molecular_function	0.0053033	0.0701868		GO:0046823	negative regulation of nucleocytoplasmic transport	biological_process	0.0042547	0.0367106
GO:0002220	innate immune response activating cell surface receptor signaling pathway	biological_process	0.00655956	0.0705275		GO:0016328	lateral plasma membrane	cellular_component	0.00313483	0.0368996
GO:0002223	stimulatory C-type lectin receptor signaling pathway	biological_process	0.00655956	0.0705275		GO:0000305	response to oxygen radical	biological_process	0.00433244	0.0371402
GO:0070972	protein localization to endoplasmic reticulum	biological_process	0.00657743	0.070588		GO:0032365	intracellular lipid transport	biological_process	0.00433244	0.0371402
GO:0019003	GDP binding	molecular_function	0.00543332	0.0706494		GO:0034694	response to prostaglandin	biological_process	0.00433244	0.0371402
GO:0031267	small GTPase binding	molecular_function	0.00548197	0.0706494		GO:1900026	positive regulation of substrate adhesion-dependent cell spreading	biological_process	0.00433244	0.0371402
GO:0042974	retinoic acid receptor binding	molecular_function	0.00560187	0.0706494		GO:0039528	cytoplasmic pattern recognition receptor signaling pathway in response to virus	biological_process	0.00437349	0.0371921
GO:0071889	14-3-3 protein binding	molecular_function	0.00560187	0.0706494		GO:0061615	glycolytic process through fructose-6-phosphate	biological_process	0.00437349	0.0371921
GO:0060337	type I interferon signaling pathway	biological_process	0.00665332	0.0711375		GO:0061620	glycolytic process through glucose-6-phosphate	biological_process	0.00437349	0.0371921
GO:0071357	cellular response to type I interferon	biological_process	0.00665332	0.0711375		GO:0071450	cellular response to oxygen radical	biological_process	0.00437349	0.0371921
GO:0000793	condensed chromosome	cellular_component	0.012082	0.0711475		GO:0071451	cellular response to superoxide	biological_process	0.00437349	0.0371921
GO:0031968	organelle outer membrane	cellular_component	0.0122277	0.0711475		GO:0050866	negative regulation of cell activation	biological_process	0.00443947	0.037693
GO:0035097	histone methyltransferase complex	cellular_component	0.0122459	0.0711475		GO:0018108	peptidyl-tyrosine phosphorylation	biological_process	0.00451925	0.0383091
GO:0038201	TOR complex	cellular_component	0.0125268	0.0721831		GO:0014706	striated muscle tissue development	biological_process	0.00453587	0.0383101
GO:0044723	single-organism carbohydrate metabolic process	biological_process	0.00682446	0.0723303		GO:0010812	negative regulation of cell-substrate adhesion	biological_process	0.00454099	0.0383101
GO:0010972	negative regulation of G2/M transition of mitotic cell cycle	biological_process	0.0068585	0.0723303		GO:0031102	neuron projection regeneration	biological_process	0.00454099	0.0383101
GO:0009451	RNA modification	biological_process	0.00686334	0.0723303		GO:0019079	viral genome replication	biological_process	0.00462936	0.038932
GO:0010824	regulation of centrosome duplication	biological_process	0.00687526	0.0723303		GO:0021987	cerebral cortex development	biological_process	0.00462936	0.038932
GO:0035872	nucleotide-binding domain, leucine rich repeat containing receptor signaling pathway	biological_process	0.00687526	0.0723303		GO:0090257	regulation of muscle system process	biological_process	0.00463729	0.0389371
GO:1901998	toxin transport	biological_process	0.00687526	0.0723303		GO:0071375	cellular response to peptide hormone stimulus	biological_process	0.00470295	0.0394262
GO:0009201	ribonucleoside triphosphate biosynthetic process	biological_process	0.00688341	0.0723303		GO:0010952	positive regulation of peptidase activity	biological_process	0.00471486	0.0394638
GO:1903008	organelle disassembly	biological_process	0.0069147	0.0723303		GO:0071902	positive regulation of protein serine/threonine kinase activity	biological_process	0.00476786	0.0398019
GO:0051053	negative regulation of DNA metabolic process	biological_process	0.00694046	0.0723303		GO:0009896	positive regulation of catabolic process	biological_process	0.00477024	0.0398019
GO:0010939	regulation of necrotic cell death	biological_process	0.0069406	0.0723303		GO:0042056	chemoattractant activity	molecular_function	0.00298589	0.039868
GO:0015985	energy coupled proton transport, down electrochemical gradient	biological_process	0.0069406	0.0723303		GO:0070888	E-box binding	molecular_function	0.00303035	0.0398996
GO:0015986	ATP synthesis coupled proton transport	biological_process	0.0069406	0.0723303		GO:0001763	morphogenesis of a branching structure	biological_process	0.00480403	0.0399584
GO:0034142	toll-like receptor 4 signaling pathway	biological_process	0.0069406	0.0723303		GO:0007565	female pregnancy	biological_process	0.00480403	0.0399584
GO:0070198	protein localization to chromosome, telomeric region	biological_process	0.0069406	0.0723303		GO:0050770	regulation of axonogenesis	biological_process	0.00483619	0.040163
GO:0090090	negative regulation of canonical Wnt signaling pathway	biological_process	0.00696818	0.0724867		GO:0006094	gluconeogenesis	biological_process	0.00485055	0.0402195
GO:0060612	adipose tissue development	biological_process	0.00706568	0.0733685		GO:0010955	negative regulation of protein processing	biological_process	0.00493446	0.040788
GO:0044773	mitotic DNA damage checkpoint	biological_process	0.00715395	0.0741515		GO:1903318	negative regulation of protein maturation	biological_process	0.00493446	0.040788
GO:0007179	transforming growth factor beta receptor signaling pathway	biological_process	0.00720398	0.0745359		GO:0034614	cellular response to reactive oxygen species	biological_process	0.00494248	0.0407908
GO:0000315	organellar large ribosomal subunit	cellular_component	0.0132097	0.0748904		GO:0010001	glial cell differentiation	biological_process	0.00496552	0.0409174
GO:0005762	mitochondrial large ribosomal subunit	cellular_component	0.0132097	0.0748904		GO:0034440	lipid oxidation	biological_process	0.00497388	0.0409229
GO:0042641	actomyosin	cellular_component	0.0133488	0.0750738		GO:0050678	regulation of epithelial cell proliferation	biological_process	0.00500197	0.0410904
GO:0006892	post-Golgi vesicle-mediated transport	biological_process	0.00731215	0.0752453		GO:0051170	nuclear import	biological_process	0.00503577	0.0412734
GO:1903829	positive regulation of cellular protein localization	biological_process	0.00732335	0.0752453		GO:0018212	peptidyl-tyrosine modification	biological_process	0.00503978	0.0412734
GO:0031061	negative regulation of histone methylation	biological_process	0.00735087	0.0752453		GO:0002526	acute inflammatory response	biological_process	0.00509255	0.0415774
GO:0090670	RNA localization to Cajal body	biological_process	0.00735087	0.0752453		GO:0022408	negative regulation of cell-cell adhesion	biological_process	0.00509255	0.0415774
GO:0090671	telomerase RNA localization to Cajal body	biological_process	0.00735087	0.0752453		GO:0000079	regulation of cyclin-dependent protein serine/threonine kinase activity	biological_process	0.00516876	0.0420061
GO:0090672	telomerase RNA localization	biological_process	0.00735087	0.0752453		GO:0032231	regulation of actin filament bundle assembly	biological_process	0.00516876	0.0420061
GO:0090575	RNA polymerase II transcription factor complex	cellular_component	0.0135526	0.0756148		GO:0046620	regulation of organ growth	biological_process	0.00516876	0.0420061
GO:0009295	nucleoid	cellular_component	0.0138042	0.0758153		GO:0009743	response to carbohydrate	biological_process	0.00518274	0.0420553
GO:0042645	mitochondrial nucleoid	cellular_component	0.0138042	0.0758153		GO:0032613	interleukin-10 production	biological_process	0.00523892	0.0423819
GO:0030324	lung development	biological_process	0.00744158	0.0759312		GO:0035904	aorta development	biological_process	0.00523892	0.0423819
GO:0051170	nuclear import	biological_process	0.00744424	0.0759312		GO:0033013	tetrapyrrole metabolic process	biological_process	0.00525758	0.0424681
GO:0008540	proteasome regulatory particle, base subcomplex	cellular_component	0.014322	0.0762755		GO:0050708	regulation of protein secretion	biological_process	0.00528798	0.0426489
GO:0017101	aminoacyl-tRNA synthetase multienzyme complex	cellular_component	0.014322	0.0762755		GO:0005200	structural constituent of cytoskeleton	molecular_function	0.00329231	0.0427549
GO:0030914	STAGA complex	cellular_component	0.014322	0.0762755		GO:0035994	response to muscle stretch	biological_process	0.00535987	0.0430211
GO:0036513	Derlin-1 retrotranslocation complex	cellular_component	0.014322	0.0762755		GO:2000778	positive regulation of interleukin-6 secretion	biological_process	0.00535987	0.0430211
GO:1903428	positive regulation of reactive oxygen species biosynthetic process	biological_process	0.00752029	0.0765715		GO:0008608	attachment of spindle microtubules to kinetochore	biological_process	0.00538269	0.0430211
GO:0009060	aerobic respiration	biological_process	0.00754939	0.0767322		GO:0034383	low-density lipoprotein particle clearance	biological_process	0.00538269	0.0430211
GO:0008654	phospholipid biosynthetic process	biological_process	0.00764722	0.0775896		GO:0042168	heme metabolic process	biological_process	0.00538269	0.0430211
GO:0004721	phosphoprotein phosphatase activity	molecular_function	0.00622805	0.0776334		GO:0071392	cellular response to estradiol stimulus	biological_process	0.00538269	0.0430211
GO:0051100	negative regulation of binding	biological_process	0.00773976	0.078036		GO:0042472	inner ear morphogenesis	biological_process	0.00539634	0.0430654
GO:0009206	purine ribonucleoside triphosphate biosynthetic process	biological_process	0.00775196	0.078036		GO:0071248	cellular response to metal ion	biological_process	0.00549951	0.0438229
GO:1901983	regulation of protein acetylation	biological_process	0.00775196	0.078036		GO:0006575	cellular modified amino acid metabolic process	biological_process	0.00555199	0.0441749
GO:0046605	regulation of centrosome cycle	biological_process	0.00777246	0.078036		GO:0002790	peptide secretion	biological_process	0.00557744	0.0443026
GO:0090181	regulation of cholesterol metabolic process	biological_process	0.00777246	0.078036		GO:0002262	myeloid cell homeostasis	biological_process	0.00558471	0.0443026
GO:0090398	cellular senescence	biological_process	0.00777246	0.078036		GO:0035767	endothelial cell chemotaxis	biological_process	0.00560562	0.0443362
GO:0034340	response to type I interferon	biological_process	0.00782196	0.0783964		GO:0060740	prostate gland epithelium morphogenesis	biological_process	0.00560562	0.0443362
GO:0050662	coenzyme binding	molecular_function	0.00637664	0.0785719		GO:0051260	protein homooligomerization	biological_process	0.00567429	0.0448125
GO:0016575	histone deacetylation	biological_process	0.00787656	0.0788067		GO:0002791	regulation of peptide secretion	biological_process	0.00577486	0.0455391
GO:0000779	condensed chromosome, centromeric region	cellular_component	0.0149257	0.0788928		GO:0099131	ATP hydrolysis coupled ion transmembrane transport	biological_process	0.00582074	0.045833
GO:0031072	heat shock protein binding	molecular_function	0.00651615	0.0793786		GO:0045926	negative regulation of growth	biological_process	0.0058717	0.0460976
GO:0070412	R-SMAD binding	molecular_function	0.00661101	0.0796292		GO:1901988	negative regulation of cell cycle phase transition	biological_process	0.0058717	0.0460976
GO:0031519	PcG protein complex	cellular_component	0.0152427	0.0799673		GO:0060090	binding, bridging	molecular_function	0.00363523	0.0465703
GO:0042054	histone methyltransferase activity	molecular_function	0.00673185	0.0801838		GO:0005506	iron ion binding	molecular_function	0.00384179	0.0467529
GO:0005758	mitochondrial intermembrane space	cellular_component	0.0154989	0.0806295		GO:0015037	peptide disulfide oxidoreductase activity	molecular_function	0.00388645	0.0467529
GO:0031256	leading edge membrane	cellular_component	0.0155983	0.0806295		GO:0019215	intermediate filament binding	molecular_function	0.00388645	0.0467529
GO:0021762	substantia nigra development	biological_process	0.00809726	0.0808744		GO:0001968	fibronectin binding	molecular_function	0.00389607	0.0467529
GO:0010975	regulation of neuron projection development	biological_process	0.00815296	0.0812898		GO:0016229	steroid dehydrogenase activity	molecular_function	0.00389607	0.0467529
GO:0051188	cofactor biosynthetic process	biological_process	0.00818086	0.0814271		GO:0035148	tube formation	biological_process	0.00600512	0.0470509
GO:0050769	positive regulation of neurogenesis	biological_process	0.00823843	0.081597		GO:0032844	regulation of homeostatic process	biological_process	0.00601084	0.0470509
GO:0032844	regulation of homeostatic process	biological_process	0.00824234	0.081597		GO:0098656	anion transmembrane transport	biological_process	0.00609143	0.0476067
GO:0032386	regulation of intracellular transport	biological_process	0.00825299	0.081597		GO:0034616	response to laminar fluid shear stress	biological_process	0.00612661	0.0476067
GO:0071166	ribonucleoprotein complex localization	biological_process	0.00825456	0.081597		GO:0034975	protein folding in endoplasmic reticulum	biological_process	0.00612661	0.0476067
GO:0048511	rhythmic process	biological_process	0.00831641	0.0818371		GO:0043691	reverse cholesterol transport	biological_process	0.00612661	0.0476067
GO:0042921	glucocorticoid receptor signaling pathway	biological_process	0.0083548	0.0818371		GO:0090178	regulation of establishment of planar polarity involved in neural tube closure	biological_process	0.00612661	0.0476067
GO:1905269	positive regulation of chromatin organization	biological_process	0.00840997	0.0818371		GO:0045088	regulation of innate immune response	biological_process	0.0061868	0.0478912
GO:0000188	inactivation of MAPK activity	biological_process	0.00842086	0.0818371		GO:0034381	plasma lipoprotein particle clearance	biological_process	0.00619928	0.0478912
GO:0000469	cleavage involved in rRNA processing	biological_process	0.00842086	0.0818371		GO:0045840	positive regulation of mitotic nuclear division	biological_process	0.00619928	0.0478912
GO:0007020	microtubule nucleation	biological_process	0.00842086	0.0818371		GO:0090183	regulation of kidney development	biological_process	0.00619928	0.0478912
GO:0046835	carbohydrate phosphorylation	biological_process	0.00842086	0.0818371		GO:0033673	negative regulation of kinase activity	biological_process	0.00624347	0.0481626
GO:0051788	response to misfolded protein	biological_process	0.00842086	0.0818371		GO:0001503	ossification	biological_process	0.00627795	0.0483584
GO:1900101	regulation of endoplasmic reticulum unfolded protein response	biological_process	0.00842086	0.0818371		GO:0030522	intracellular receptor signaling pathway	biological_process	0.00633683	0.0487265
GO:1903205	regulation of hydrogen peroxide-induced cell death	biological_process	0.00842086	0.0818371		GO:0007599	hemostasis	biological_process	0.00634408	0.0487265
GO:0045088	regulation of innate immune response	biological_process	0.00846154	0.082094		GO:0032091	negative regulation of protein binding	biological_process	0.0065448	0.0501957
GO:0034405	response to fluid shear stress	biological_process	0.00853746	0.0823563		GO:1901991	negative regulation of mitotic cell cycle phase transition	biological_process	0.00659096	0.050454
GO:0060412	ventricular septum morphogenesis	biological_process	0.00853746	0.0823563		GO:0034405	response to fluid shear stress	biological_process	0.00661646	0.050454
GO:1902229	regulation of intrinsic apoptotic signaling pathway in response to DNA damage	biological_process	0.00853746	0.0823563		GO:1905819	negative regulation of chromosome separation	biological_process	0.00661646	0.050454
GO:0008593	regulation of Notch signaling pathway	biological_process	0.00854573	0.0823563		GO:2000816	negative regulation of mitotic sister chromatid separation	biological_process	0.00661646	0.050454
GO:0000280	nuclear division	biological_process	0.00856611	0.0824149		GO:0000271	polysaccharide biosynthetic process	biological_process	0.00663627	0.0505326
GO:0008135	translation factor activity, RNA binding	molecular_function	0.00702975	0.082812		GO:0032535	regulation of cellular component size	biological_process	0.00672677	0.0509575
GO:0007033	vacuole organization	biological_process	0.00865301	0.0830738		GO:0044724	single-organism carbohydrate catabolic process	biological_process	0.00672997	0.0509575
GO:0090307	mitotic spindle assembly	biological_process	0.00869291	0.0830738		GO:0001952	regulation of cell-matrix adhesion	biological_process	0.00674131	0.0509575
GO:2000756	regulation of peptidyl-lysine acetylation	biological_process	0.00869291	0.0830738		GO:0006690	icosanoid metabolic process	biological_process	0.00674131	0.0509575
GO:0038179	neurotrophin signaling pathway	biological_process	0.00871309	0.0830738		GO:1901568	fatty acid derivative metabolic process	biological_process	0.00674131	0.0509575
GO:0046685	response to arsenic-containing substance	biological_process	0.00871309	0.0830738		GO:0043903	regulation of symbiosis, encompassing mutualism through parasitism	biological_process	0.00674959	0.0509575
GO:0042773	ATP synthesis coupled electron transport	biological_process	0.0087211	0.0830738		GO:1903052	positive regulation of proteolysis involved in cellular protein catabolic process	biological_process	0.00677755	0.051096
GO:0071396	cellular response to lipid	biological_process	0.00873977	0.0830799		GO:0045927	positive regulation of growth	biological_process	0.00683902	0.0514864
GO:0002283	neutrophil activation involved in immune response	biological_process	0.00876498	0.0830799		GO:0070160	occluding junction	cellular_component	0.00470338	0.052108
GO:0043312	neutrophil degranulation	biological_process	0.00876498	0.0830799		GO:0030016	myofibril	cellular_component	0.00470924	0.052108
GO:0002934	desmosome organization	biological_process	0.00890213	0.0834195		GO:0009897	external side of plasma membrane	cellular_component	0.00480289	0.052108
GO:0009396	folic acid-containing compound biosynthetic process	biological_process	0.00890213	0.0834195		GO:0033176	proton-transporting V-type ATPase complex	cellular_component	0.00484017	0.052108
GO:0034214	protein hexamerization	biological_process	0.00890213	0.0834195		GO:0005769	early endosome	cellular_component	0.00488801	0.052108
GO:0034770	histone H4-K20 methylation	biological_process	0.00890213	0.0834195		GO:1903201	regulation of oxidative stress-induced cell death	biological_process	0.00697225	0.0523583
GO:0043201	response to leucine	biological_process	0.00890213	0.0834195		GO:0006790	sulfur compound metabolic process	biological_process	0.00697454	0.0523583
GO:0048711	positive regulation of astrocyte differentiation	biological_process	0.00890213	0.0834195		GO:0055065	metal ion homeostasis	biological_process	0.00702553	0.0524831
GO:0060546	negative regulation of necroptotic process	biological_process	0.00890213	0.0834195		GO:0007266	Rho protein signal transduction	biological_process	0.00703629	0.0524831
GO:0019674	NAD metabolic process	biological_process	0.00893603	0.0836012		GO:0036473	cell death in response to oxidative stress	biological_process	0.0070517	0.0524831
GO:0090132	epithelium migration	biological_process	0.00904055	0.0838002		GO:0071260	cellular response to mechanical stimulus	biological_process	0.0070517	0.0524831
GO:0031058	positive regulation of histone modification	biological_process	0.00904475	0.0838002		GO:0031111	negative regulation of microtubule polymerization or depolymerization	biological_process	0.00708004	0.0524831
GO:0034134	toll-like receptor 2 signaling pathway	biological_process	0.00905909	0.0838002		GO:0048246	macrophage chemotaxis	biological_process	0.00708004	0.0524831
GO:0043517	positive regulation of DNA damage response, signal transduction by p53 class mediator	biological_process	0.00905909	0.0838002		GO:0051642	centrosome localization	biological_process	0.00708004	0.0524831
GO:0044794	positive regulation by host of viral process	biological_process	0.00905909	0.0838002		GO:0071634	regulation of transforming growth factor beta production	biological_process	0.00708004	0.0524831
GO:0050812	regulation of acyl-CoA biosynthetic process	biological_process	0.00905909	0.0838002		GO:0072604	interleukin-6 secretion	biological_process	0.00708004	0.0524831
GO:0070525	tRNA threonylcarbamoyladenosine metabolic process	biological_process	0.00905909	0.0838002		GO:0005080	protein kinase C binding	molecular_function	0.00452481	0.0525399
GO:0001725	stress fiber	cellular_component	0.0166915	0.0842823		GO:0002020	protease binding	molecular_function	0.00453481	0.0525399
GO:0097517	contractile actin filament bundle	cellular_component	0.0166915	0.0842823		GO:0042625	ATPase coupled ion transmembrane transporter activity	molecular_function	0.00459292	0.0525399
GO:0030864	cortical actin cytoskeleton	cellular_component	0.0167558	0.0842823		GO:0008022	protein C-terminus binding	molecular_function	0.00460002	0.0525399
GO:1902555	endoribonuclease complex	cellular_component	0.0169044	0.0842823		GO:0045429	positive regulation of nitric oxide biosynthetic process	biological_process	0.00713101	0.05257
GO:1905348	endonuclease complex	cellular_component	0.0169044	0.0842823		GO:0046825	regulation of protein export from nucleus	biological_process	0.00713101	0.05257
GO:0007059	chromosome segregation	biological_process	0.0092004	0.084971		GO:1904407	positive regulation of nitric oxide metabolic process	biological_process	0.00713101	0.05257
GO:0060759	regulation of response to cytokine stimulus	biological_process	0.00925184	0.0851731		GO:0016331	morphogenesis of embryonic epithelium	biological_process	0.00713133	0.05257
GO:2000377	regulation of reactive oxygen species metabolic process	biological_process	0.00925184	0.0851731		GO:0045428	regulation of nitric oxide biosynthetic process	biological_process	0.00721033	0.0530788
GO:0002446	neutrophil mediated immunity	biological_process	0.0092827	0.0853209		GO:0019320	hexose catabolic process	biological_process	0.0072911	0.0533777
GO:0051287	NAD binding	molecular_function	0.00753509	0.085589		GO:0043388	positive regulation of DNA binding	biological_process	0.0072911	0.0533777
GO:0003756	protein disulfide isomerase activity	molecular_function	0.00767969	0.085589		GO:0048008	platelet-derived growth factor receptor signaling pathway	biological_process	0.0072911	0.0533777
GO:0005112	Notch binding	molecular_function	0.00767969	0.085589		GO:0070228	regulation of lymphocyte apoptotic process	biological_process	0.0072911	0.0533777
GO:0016864	intramolecular oxidoreductase activity, transposing S-S bonds	molecular_function	0.00767969	0.085589		GO:0045069	regulation of viral genome replication	biological_process	0.00733534	0.053554
GO:0050750	low-density lipoprotein particle receptor binding	molecular_function	0.00767969	0.085589		GO:1904029	regulation of cyclin-dependent protein kinase activity	biological_process	0.00733534	0.053554
GO:0016860	intramolecular oxidoreductase activity	molecular_function	0.00804003	0.085589		GO:0000226	microtubule cytoskeleton organization	biological_process	0.00734975	0.0535856
GO:0033558	protein deacetylase activity	molecular_function	0.00804003	0.085589		GO:0016323	basolateral plasma membrane	cellular_component	0.00516047	0.0539938
GO:0034062	5'-3' RNA polymerase activity	molecular_function	0.00804003	0.085589		GO:0051259	protein oligomerization	biological_process	0.00747475	0.0544223
GO:0097747	RNA polymerase activity	molecular_function	0.00804003	0.085589		GO:0007045	cell-substrate adherens junction assembly	biological_process	0.0075399	0.0545232
GO:0060589	nucleoside-triphosphatase regulator activity	molecular_function	0.00806389	0.085589		GO:0019674	NAD metabolic process	biological_process	0.0075399	0.0545232
GO:0061077	chaperone-mediated protein folding	biological_process	0.00936159	0.0857724		GO:0043462	regulation of ATPase activity	biological_process	0.0075399	0.0545232
GO:0071479	cellular response to ionizing radiation	biological_process	0.00936159	0.0857724		GO:0048041	focal adhesion assembly	biological_process	0.0075399	0.0545232
GO:0045540	regulation of cholesterol biosynthetic process	biological_process	0.00938191	0.0858221		GO:2000106	regulation of leukocyte apoptotic process	biological_process	0.0075399	0.0545232
GO:0045277	respiratory chain complex IV	cellular_component	0.0173671	0.0859794		GO:0008009	chemokine activity	molecular_function	0.00500201	0.0557871
GO:0016874	ligase activity	molecular_function	0.00818635	0.0860369		GO:0016628	oxidoreductase activity, acting on the CH-CH group of donors, NAD or NADP as acceptor	molecular_function	0.00500201	0.0557871
GO:0019028	viral capsid	cellular_component	0.0177551	0.0861128		GO:0015850	organic hydroxy compound transport	biological_process	0.0078705	0.0568366
GO:0035861	site of double-strand break	cellular_component	0.0177615	0.0861128		GO:0007596	blood coagulation	biological_process	0.00791323	0.0570676
GO:0090734	site of DNA damage	cellular_component	0.0177615	0.0861128		GO:0055067	monovalent inorganic cation homeostasis	biological_process	0.00796057	0.0573312
GO:0009124	nucleoside monophosphate biosynthetic process	biological_process	0.00950373	0.0867987		GO:0006977	DNA damage response, signal transduction by p53 class mediator resulting in cell cycle arrest	biological_process	0.00798031	0.0573956
GO:0019867	outer membrane	cellular_component	0.0180639	0.086979		GO:0006084	acetyl-CoA metabolic process	biological_process	0.00805269	0.0578379
GO:2000027	regulation of organ morphogenesis	biological_process	0.00958783	0.0874283		GO:0031345	negative regulation of cell projection organization	biological_process	0.00816154	0.0585406
GO:0006405	RNA export from nucleus	biological_process	0.00961892	0.0874312		GO:0002221	pattern recognition receptor signaling pathway	biological_process	0.00819661	0.0586605
GO:0031146	SCF-dependent proteasomal ubiquitin-dependent protein catabolic process	biological_process	0.0096532	0.0874312		GO:0032507	maintenance of protein location in cell	biological_process	0.00820033	0.0586605
GO:2001022	positive regulation of response to DNA damage stimulus	biological_process	0.0096532	0.0874312		GO:0046683	response to organophosphorus	biological_process	0.00827427	0.0590305
GO:0007584	response to nutrient	biological_process	0.0096707	0.0874312		GO:0090288	negative regulation of cellular response to growth factor stimulus	biological_process	0.00827427	0.0590305
GO:0032231	regulation of actin filament bundle assembly	biological_process	0.00967346	0.0874312		GO:0031644	regulation of neurological system process	biological_process	0.00832989	0.059189
GO:2001238	positive regulation of extrinsic apoptotic signaling pathway	biological_process	0.00969206	0.0874312		GO:0060420	regulation of heart growth	biological_process	0.00832989	0.059189
GO:0051651	maintenance of location in cell	biological_process	0.00969435	0.0874312		GO:0097306	cellular response to alcohol	biological_process	0.00832989	0.059189
GO:0001056	RNA polymerase III activity	molecular_function	0.00869143	0.08747		GO:0043491	protein kinase B signaling	biological_process	0.00842469	0.0596718
GO:0046527	glucosyltransferase activity	molecular_function	0.00869143	0.08747		GO:0045732	positive regulation of protein catabolic process	biological_process	0.00847154	0.0596718
GO:0001102	RNA polymerase II activating transcription factor binding	molecular_function	0.00904549	0.08747		GO:0030514	negative regulation of BMP signaling pathway	biological_process	0.00847643	0.0596718
GO:0004532	exoribonuclease activity	molecular_function	0.00904549	0.08747		GO:0031638	zymogen activation	biological_process	0.00847643	0.0596718
GO:0016410	N-acyltransferase activity	molecular_function	0.00908236	0.08747		GO:0051496	positive regulation of stress fiber assembly	biological_process	0.00847643	0.0596718
GO:0042623	ATPase activity, coupled	molecular_function	0.00912864	0.08747		GO:1900408	negative regulation of cellular response to oxidative stress	biological_process	0.00847643	0.0596718
GO:0000182	rDNA binding	molecular_function	0.00918026	0.08747		GO:1903202	negative regulation of oxidative stress-induced cell death	biological_process	0.00847643	0.0596718
GO:0004576	oligosaccharyl transferase activity	molecular_function	0.00918026	0.08747		GO:0001991	regulation of systemic arterial blood pressure by circulatory renin-angiotensin	biological_process	0.00851145	0.0597022
GO:0016538	cyclin-dependent protein serine/threonine kinase regulator activity	molecular_function	0.00918924	0.08747		GO:0042448	progesterone metabolic process	biological_process	0.00851145	0.0597022
GO:0061650	ubiquitin-like protein conjugating enzyme activity	molecular_function	0.00918924	0.08747		GO:0034113	heterotypic cell-cell adhesion	biological_process	0.00852568	0.0597022
GO:0009982	pseudouridine synthase activity	molecular_function	0.00938344	0.08747		GO:1903428	positive regulation of reactive oxygen species biosynthetic process	biological_process	0.00852568	0.0597022
GO:0034450	ubiquitin-ubiquitin ligase activity	molecular_function	0.00938344	0.08747		GO:1900407	regulation of cellular response to oxidative stress	biological_process	0.00853796	0.0597095
GO:0035613	RNA stem-loop binding	molecular_function	0.00938344	0.08747		GO:0005125	cytokine activity	molecular_function	0.00543229	0.0598815
GO:0090305	nucleic acid phosphodiester bond hydrolysis	biological_process	0.00988969	0.0890536		GO:0022604	regulation of cell morphogenesis	biological_process	0.00859305	0.0600159
GO:0044344	cellular response to fibroblast growth factor stimulus	biological_process	0.00992005	0.0891876		GO:0050817	coagulation	biological_process	0.0087977	0.0605299
GO:0001959	regulation of cytokine-mediated signaling pathway	biological_process	0.0099662	0.089463		GO:0000303	response to superoxide	biological_process	0.00882317	0.0605299
GO:0070423	nucleotide-binding oligomerization domain containing signaling pathway	biological_process	0.0100945	0.0903333		GO:0002053	positive regulation of mesenchymal cell proliferation	biological_process	0.00882317	0.0605299
GO:1905898	positive regulation of response to endoplasmic reticulum stress	biological_process	0.0100945	0.0903333		GO:0030224	monocyte differentiation	biological_process	0.00882317	0.0605299
GO:0030139	endocytic vesicle	cellular_component	0.0189224	0.0904928		GO:0034698	response to gonadotropin	biological_process	0.00882317	0.0605299
GO:0051647	nucleus localization	biological_process	0.0101458	0.0905114		GO:0045746	negative regulation of Notch signaling pathway	biological_process	0.00882317	0.0605299
GO:0061157	mRNA destabilization	biological_process	0.0101458	0.0905114		GO:0046320	regulation of fatty acid oxidation	biological_process	0.00882317	0.0605299
GO:0045047	protein targeting to ER	biological_process	0.0101895	0.090688		GO:0061842	microtubule organizing center localization	biological_process	0.00882317	0.0605299
GO:0030521	androgen receptor signaling pathway	biological_process	0.0101971	0.090688		GO:0070229	negative regulation of lymphocyte apoptotic process	biological_process	0.00882317	0.0605299
GO:0010632	regulation of epithelial cell migration	biological_process	0.0102291	0.0908327		GO:0071604	transforming growth factor beta production	biological_process	0.00882317	0.0605299
GO:0007032	endosome organization	biological_process	0.0103841	0.0919026		GO:0071624	positive regulation of granulocyte chemotaxis	biological_process	0.00882317	0.0605299
GO:0050657	nucleic acid transport	biological_process	0.0103974	0.0919026		GO:1903131	mononuclear cell differentiation	biological_process	0.00882317	0.0605299
GO:0050658	RNA transport	biological_process	0.0103974	0.0919026		GO:1903580	positive regulation of ATP metabolic process	biological_process	0.00882317	0.0605299
GO:0006289	nucleotide-excision repair	biological_process	0.0105662	0.0928555		GO:0051099	positive regulation of binding	biological_process	0.00883562	0.0605299
GO:0006482	protein demethylation	biological_process	0.0106082	0.0928555		GO:0016485	protein processing	biological_process	0.00883748	0.0605299
GO:0008214	protein dealkylation	biological_process	0.0106082	0.0928555		GO:0032436	positive regulation of proteasomal ubiquitin-dependent protein catabolic process	biological_process	0.00891572	0.0609624
GO:0060338	regulation of type I interferon-mediated signaling pathway	biological_process	0.0106082	0.0928555		GO:0000086	G2/M transition of mitotic cell cycle	biological_process	0.00895744	0.0609624
GO:0072595	maintenance of protein localization in organelle	biological_process	0.0106082	0.0928555		GO:0044839	cell cycle G2/M phase transition	biological_process	0.00898818	0.0609624
GO:0033047	regulation of mitotic sister chromatid segregation	biological_process	0.0106193	0.0928555		GO:0050764	regulation of phagocytosis	biological_process	0.00909891	0.0609624
GO:1901184	regulation of ERBB signaling pathway	biological_process	0.0106281	0.0928555		GO:0072431	signal transduction involved in mitotic G1 DNA damage checkpoint	biological_process	0.00909891	0.0609624
GO:0034329	cell junction assembly	biological_process	0.0106498	0.0928555		GO:1902400	intracellular signal transduction involved in G1 DNA damage checkpoint	biological_process	0.00909891	0.0609624
GO:0045931	positive regulation of mitotic cell cycle	biological_process	0.0107058	0.0928555		GO:0060627	regulation of vesicle-mediated transport	biological_process	0.00910071	0.0609624
GO:0071774	response to fibroblast growth factor	biological_process	0.0107058	0.0928555		GO:0002523	leukocyte migration involved in inflammatory response	biological_process	0.00911855	0.0609624
GO:0006284	base-excision repair	biological_process	0.0107201	0.0928555		GO:0002524	hypersensitivity	biological_process	0.00911855	0.0609624
GO:0006515	misfolded or incompletely synthesized protein catabolic process	biological_process	0.0107308	0.0928555		GO:0002934	desmosome organization	biological_process	0.00911855	0.0609624
GO:0036474	cell death in response to hydrogen peroxide	biological_process	0.0107308	0.0928555		GO:0003334	keratinocyte development	biological_process	0.00911855	0.0609624
GO:1902230	negative regulation of intrinsic apoptotic signaling pathway in response to DNA damage	biological_process	0.0107308	0.0928555		GO:0031645	negative regulation of neurological system process	biological_process	0.00911855	0.0609624
GO:0032507	maintenance of protein location in cell	biological_process	0.01096	0.0946963		GO:0032352	positive regulation of hormone metabolic process	biological_process	0.00911855	0.0609624
GO:0001085	RNA polymerase II transcription factor binding	molecular_function	0.0102531	0.094753		GO:0046479	glycosphingolipid catabolic process	biological_process	0.00911855	0.0609624
GO:0032040	small-subunit processome	cellular_component	0.0200211	0.0951004		GO:0048671	negative regulation of collateral sprouting	biological_process	0.00911855	0.0609624
GO:0090501	RNA phosphodiester bond hydrolysis	biological_process	0.0111023	0.0957819		GO:0051657	maintenance of organelle location	biological_process	0.00911855	0.0609624
GO:0033116	endoplasmic reticulum-Golgi intermediate compartment membrane	cellular_component	0.0203082	0.0958166		GO:0072182	regulation of nephron tubule epithelial cell differentiation	biological_process	0.00911855	0.0609624
GO:0030496	midbody	cellular_component	0.020617	0.0959852		GO:0072567	chemokine (C-X-C motif) ligand 2 production	biological_process	0.00911855	0.0609624
GO:0044450	microtubule organizing center part	cellular_component	0.020617	0.0959852		GO:0090331	negative regulation of platelet aggregation	biological_process	0.00911855	0.0609624
GO:0008080	N-acetyltransferase activity	molecular_function	0.0105587	0.0963528		GO:0043292	contractile fiber	cellular_component	0.00594278	0.0610485
GO:0043014	alpha-tubulin binding	molecular_function	0.010606	0.0963528		GO:0030901	midbrain development	biological_process	0.0091445	0.0610591
GO:0060590	ATPase regulator activity	molecular_function	0.0107004	0.0963938		GO:0032799	low-density lipoprotein receptor particle metabolic process	biological_process	0.00915979	0.0610844
GO:0032432	actin filament bundle	cellular_component	0.0210469	0.0964252		GO:0005811	lipid particle	cellular_component	0.00606012	0.0611423
GO:0031248	protein acetyltransferase complex	cellular_component	0.021123	0.0964252		GO:0031333	negative regulation of protein complex assembly	biological_process	0.0091922	0.0611729
GO:1902493	acetyltransferase complex	cellular_component	0.021123	0.0964252		GO:0007093	mitotic cell cycle checkpoint	biological_process	0.00919608	0.0611729
GO:0072599	establishment of protein localization to endoplasmic reticulum	biological_process	0.0111941	0.09643		GO:0098644	complex of collagen trimers	cellular_component	0.00621681	0.0616228
GO:0000803	sex chromosome	cellular_component	0.0215068	0.0969187		GO:0045444	fat cell differentiation	biological_process	0.00933629	0.0619275
GO:0030867	rough endoplasmic reticulum membrane	cellular_component	0.0215068	0.0969187		GO:0017038	protein import	biological_process	0.00934195	0.0619275
GO:0034399	nuclear periphery	cellular_component	0.0218798	0.0979714		GO:0061564	axon development	biological_process	0.00934447	0.0619275
GO:0060249	anatomical structure homeostasis	biological_process	0.0115775	0.0993406		GO:0048469	cell maturation	biological_process	0.0094249	0.0623052
GO:0051983	regulation of chromosome segregation	biological_process	0.0116158	0.0993406		GO:0051100	negative regulation of binding	biological_process	0.0094249	0.0623052
GO:0006513	protein monoubiquitination	biological_process	0.0116182	0.0993406		GO:0007178	transmembrane receptor protein serine/threonine kinase signaling pathway	biological_process	0.00949582	0.062696
GO:0006521	regulation of cellular amino acid metabolic process	biological_process	0.0116182	0.0993406		GO:0015807	L-amino acid transport	biological_process	0.0095796	0.0630924
GO:0009145	purine nucleoside triphosphate biosynthetic process	biological_process	0.0116182	0.0993406		GO:0099132	ATP hydrolysis coupled cation transmembrane transport	biological_process	0.0095796	0.0630924
GO:0043484	regulation of RNA splicing	biological_process	0.0117027	0.0999147		GO:0005775	vacuolar lumen	cellular_component	0.00649268	0.0632477
GO:0031057	negative regulation of histone modification	biological_process	0.0117223	0.0999346		GO:1903426	regulation of reactive oxygen species biosynthetic process	biological_process	0.00963688	0.0633911
GO:0055038	recycling endosome membrane	cellular_component	0.0224877	0.100056		GO:0006644	phospholipid metabolic process	biological_process	0.00968378	0.0635458
GO:0000791	euchromatin	cellular_component	0.0226686	0.100227		GO:0043524	negative regulation of neuron apoptotic process	biological_process	0.00968431	0.0635458
GO:0034333	adherens junction assembly	biological_process	0.0118811	0.101004		GO:0033048	negative regulation of mitotic sister chromatid segregation	biological_process	0.00971056	0.0635611
GO:0008360	regulation of cell shape	biological_process	0.0119013	0.101004		GO:0071675	regulation of mononuclear cell migration	biological_process	0.00971056	0.0635611
GO:1903311	regulation of mRNA metabolic process	biological_process	0.0119013	0.101004		GO:0031348	negative regulation of defense response	biological_process	0.00990252	0.0646569
GO:0010595	positive regulation of endothelial cell migration	biological_process	0.0119179	0.101004		GO:0032233	positive regulation of actin filament bundle assembly	biological_process	0.00991447	0.0646569
GO:0004407	histone deacetylase activity	molecular_function	0.0114202	0.101094		GO:2001238	positive regulation of extrinsic apoptotic signaling pathway	biological_process	0.00991447	0.0646569
GO:0016655	oxidoreductase activity, acting on NAD(P)H, quinone or similar compound as acceptor	molecular_function	0.0114234	0.101094		GO:0008625	extrinsic apoptotic signaling pathway via death domain receptors	biological_process	0.00998299	0.0648557
GO:0030374	ligand-dependent nuclear receptor transcription coactivator activity	molecular_function	0.0115994	0.101094		GO:0034333	adherens junction assembly	biological_process	0.00998299	0.0648557
GO:0048365	Rac GTPase binding	molecular_function	0.0115994	0.101094		GO:0032570	response to progesterone	biological_process	0.010006	0.0648557
GO:0000123	histone acetyltransferase complex	cellular_component	0.0230355	0.101212		GO:0046622	positive regulation of organ growth	biological_process	0.010006	0.0648557
GO:0002009	morphogenesis of an epithelium	biological_process	0.0120651	0.10184		GO:1902883	negative regulation of response to oxidative stress	biological_process	0.010006	0.0648557
GO:0031958	corticosteroid receptor signaling pathway	biological_process	0.0120872	0.10184		GO:0060560	developmental growth involved in morphogenesis	biological_process	0.0101954	0.0659283
GO:0035635	entry of bacterium into host cell	biological_process	0.0120872	0.10184		GO:0009306	protein secretion	biological_process	0.0101962	0.0659283
GO:0043162	ubiquitin-dependent protein catabolic process via the multivesicular body sorting pathway	biological_process	0.0120872	0.10184		GO:0030308	negative regulation of cell growth	biological_process	0.0103196	0.0664264
GO:0005905	clathrin-coated pit	cellular_component	0.0238015	0.103386		GO:0035690	cellular response to drug	biological_process	0.0103358	0.0664264
GO:0000118	histone deacetylase complex	cellular_component	0.0239174	0.103386		GO:0072413	signal transduction involved in mitotic cell cycle checkpoint	biological_process	0.0103358	0.0664264
GO:1902554	serine/threonine protein kinase complex	cellular_component	0.0239715	0.103386		GO:1902402	signal transduction involved in mitotic DNA damage checkpoint	biological_process	0.0103358	0.0664264
GO:0032259	methylation	biological_process	0.0123456	0.103866		GO:1902403	signal transduction involved in mitotic DNA integrity checkpoint	biological_process	0.0103358	0.0664264
GO:0002478	antigen processing and presentation of exogenous peptide antigen	biological_process	0.0123976	0.103999		GO:0045931	positive regulation of mitotic cell cycle	biological_process	0.0105426	0.0676737
GO:0022406	membrane docking	biological_process	0.0123976	0.103999		GO:0016052	carbohydrate catabolic process	biological_process	0.0106799	0.0684727
GO:0071478	cellular response to radiation	biological_process	0.0124451	0.104245		GO:0051604	protein maturation	biological_process	0.0106966	0.0684971
GO:0051219	phosphoprotein binding	molecular_function	0.0120934	0.10455		GO:0007219	Notch signaling pathway	biological_process	0.0107162	0.0685399
GO:0006356	regulation of transcription from RNA polymerase I promoter	biological_process	0.0126017	0.105251		GO:0051896	regulation of protein kinase B signaling	biological_process	0.0108169	0.0689703
GO:0043928	exonucleolytic nuclear-transcribed mRNA catabolic process involved in deadenylation-dependent decay	biological_process	0.0126017	0.105251		GO:0006536	glutamate metabolic process	biological_process	0.0108614	0.0689703
GO:0030100	regulation of endocytosis	biological_process	0.0126829	0.105777		GO:0007094	mitotic spindle assembly checkpoint	biological_process	0.0108614	0.0689703
GO:0000070	mitotic sister chromatid segregation	biological_process	0.012707	0.105824		GO:0045987	positive regulation of smooth muscle contraction	biological_process	0.0108614	0.0689703
GO:0010594	regulation of endothelial cell migration	biological_process	0.01273	0.105863		GO:1904705	regulation of vascular smooth muscle cell proliferation	biological_process	0.0108614	0.0689703
GO:0098876	vesicle-mediated transport to the plasma membrane	biological_process	0.0127991	0.106284		GO:1990874	vascular smooth muscle cell proliferation	biological_process	0.0108614	0.0689703
GO:0071426	ribonucleoprotein complex export from nucleus	biological_process	0.012821	0.106313		GO:0046365	monosaccharide catabolic process	biological_process	0.0109688	0.0694039
GO:0042555	MCM complex	cellular_component	0.0251466	0.107045		GO:0046889	positive regulation of lipid biosynthetic process	biological_process	0.0109688	0.0694039
GO:0019012	virion	cellular_component	0.0252765	0.107045		GO:0071384	cellular response to corticosteroid stimulus	biological_process	0.0109688	0.0694039
GO:0044423	virion part	cellular_component	0.0252765	0.107045		GO:0043270	positive regulation of ion transport	biological_process	0.0110424	0.0697228
GO:0060627	regulation of vesicle-mediated transport	biological_process	0.0130461	0.107675		GO:0050680	negative regulation of epithelial cell proliferation	biological_process	0.0110455	0.0697228
GO:0051495	positive regulation of cytoskeleton organization	biological_process	0.0130653	0.107675		GO:0009108	coenzyme biosynthetic process	biological_process	0.0110992	0.0698962
GO:0000715	nucleotide-excision repair, DNA damage recognition	biological_process	0.0131865	0.107675		GO:0035265	organ growth	biological_process	0.0110992	0.0698962
GO:0048011	neurotrophin TRK receptor signaling pathway	biological_process	0.0131865	0.107675		GO:0002028	regulation of sodium ion transport	biological_process	0.0111479	0.0701197
GO:0051984	positive regulation of chromosome segregation	biological_process	0.0131865	0.107675		GO:0051188	cofactor biosynthetic process	biological_process	0.011247	0.0706592
GO:0000083	regulation of transcription involved in G1/S transition of mitotic cell cycle	biological_process	0.0131882	0.107675		GO:0001843	neural tube closure	biological_process	0.0112898	0.0707564
GO:0030866	cortical actin cytoskeleton organization	biological_process	0.0131882	0.107675		GO:0060606	tube closure	biological_process	0.0112898	0.0707564
GO:0030970	retrograde protein transport, ER to cytosol	biological_process	0.0131882	0.107675		GO:0043648	dicarboxylic acid metabolic process	biological_process	0.0113024	0.0707564
GO:1903513	endoplasmic reticulum to cytosol transport	biological_process	0.0131882	0.107675		GO:0030033	microvillus assembly	biological_process	0.0114687	0.0711296
GO:0045089	positive regulation of innate immune response	biological_process	0.0131883	0.107675		GO:0045655	regulation of monocyte differentiation	biological_process	0.0114687	0.0711296
GO:0006383	transcription from RNA polymerase III promoter	biological_process	0.0132095	0.107675		GO:0072234	metanephric nephron tubule development	biological_process	0.0114687	0.0711296
GO:1901185	negative regulation of ERBB signaling pathway	biological_process	0.0132095	0.107675		GO:0090136	epithelial cell-cell adhesion	biological_process	0.0114687	0.0711296
GO:0070577	lysine-acetylated histone binding	molecular_function	0.0125822	0.107905		GO:0090231	regulation of spindle checkpoint	biological_process	0.0114687	0.0711296
GO:0031983	vesicle lumen	cellular_component	0.0259624	0.109291		GO:1902043	positive regulation of extrinsic apoptotic signaling pathway via death domain receptors	biological_process	0.0114687	0.0711296
GO:0019882	antigen processing and presentation	biological_process	0.0134478	0.109309		GO:0010517	regulation of phospholipase activity	biological_process	0.0114691	0.0711296
GO:0045216	cell-cell junction organization	biological_process	0.0134478	0.109309		GO:0060324	face development	biological_process	0.0114691	0.0711296
GO:0042177	negative regulation of protein catabolic process	biological_process	0.0135366	0.109875		GO:0002573	myeloid leukocyte differentiation	biological_process	0.0114913	0.0711844
GO:1901607	alpha-amino acid biosynthetic process	biological_process	0.0136715	0.110814		GO:0010464	regulation of mesenchymal cell proliferation	biological_process	0.0116092	0.0712258
GO:0016887	ATPase activity	molecular_function	0.0132403	0.111421		GO:1904031	positive regulation of cyclin-dependent protein kinase activity	biological_process	0.0116092	0.0712258
GO:0035257	nuclear hormone receptor binding	molecular_function	0.0132912	0.111421		GO:1904036	negative regulation of epithelial cell apoptotic process	biological_process	0.0116092	0.0712258
GO:0034061	DNA polymerase activity	molecular_function	0.013304	0.111421		GO:0030194	positive regulation of blood coagulation	biological_process	0.0116454	0.0712258
GO:0006520	cellular amino acid metabolic process	biological_process	0.0137847	0.111574		GO:0031954	positive regulation of protein autophosphorylation	biological_process	0.0116454	0.0712258
GO:0009055	electron carrier activity	molecular_function	0.0135834	0.112879		GO:0051894	positive regulation of focal adhesion assembly	biological_process	0.0116454	0.0712258
GO:0006388	tRNA splicing, via endonucleolytic cleavage and ligation	biological_process	0.014124	0.112894		GO:0055093	response to hyperoxia	biological_process	0.0116454	0.0712258
GO:0032075	positive regulation of nuclease activity	biological_process	0.014124	0.112894		GO:0060045	positive regulation of cardiac muscle cell proliferation	biological_process	0.0116454	0.0712258
GO:0036124	histone H3-K9 trimethylation	biological_process	0.014124	0.112894		GO:0071379	cellular response to prostaglandin stimulus	biological_process	0.0116454	0.0712258
GO:0042249	establishment of planar polarity of embryonic epithelium	biological_process	0.014124	0.112894		GO:0072337	modified amino acid transport	biological_process	0.0116454	0.0712258
GO:0042559	pteridine-containing compound biosynthetic process	biological_process	0.014124	0.112894		GO:1900048	positive regulation of hemostasis	biological_process	0.0116454	0.0712258
GO:0043248	proteasome assembly	biological_process	0.014124	0.112894		GO:0007517	muscle organ development	biological_process	0.0116645	0.0712608
GO:0048385	regulation of retinoic acid receptor signaling pathway	biological_process	0.014124	0.112894		GO:0050766	positive regulation of phagocytosis	biological_process	0.0117343	0.0716046
GO:0060644	mammary gland epithelial cell differentiation	biological_process	0.014124	0.112894		GO:0001736	establishment of planar polarity	biological_process	0.0117908	0.0716392
GO:0070200	establishment of protein localization to telomere	biological_process	0.014124	0.112894		GO:0007164	establishment of tissue polarity	biological_process	0.0117908	0.0716392
GO:0032091	negative regulation of protein binding	biological_process	0.014194	0.113297		GO:0055076	transition metal ion homeostasis	biological_process	0.0117908	0.0716392
GO:0017015	regulation of transforming growth factor beta receptor signaling pathway	biological_process	0.0143009	0.113827		GO:2001235	positive regulation of apoptotic signaling pathway	biological_process	0.0117939	0.0716392
GO:0010035	response to inorganic substance	biological_process	0.0143186	0.113827		GO:0022409	positive regulation of cell-cell adhesion	biological_process	0.0118742	0.072045
GO:0048002	antigen processing and presentation of peptide antigen	biological_process	0.0143198	0.113827		GO:0006469	negative regulation of protein kinase activity	biological_process	0.0119893	0.0726603
GO:0051427	hormone receptor binding	molecular_function	0.0139839	0.113865		GO:0010950	positive regulation of endopeptidase activity	biological_process	0.0120214	0.0727721
GO:0008047	enzyme activator activity	molecular_function	0.014024	0.113865		GO:0030216	keratinocyte differentiation	biological_process	0.0120458	0.0728314
GO:0019213	deacetylase activity	molecular_function	0.0141536	0.113865		GO:0044057	regulation of system process	biological_process	0.0120586	0.0728314
GO:0044390	ubiquitin-like protein conjugating enzyme binding	molecular_function	0.0142264	0.113865		GO:0050865	regulation of cell activation	biological_process	0.012095	0.072968
GO:0036459	thiol-dependent ubiquitinyl hydrolase activity	molecular_function	0.0142332	0.113865		GO:0002367	cytokine production involved in immune response	biological_process	0.0121637	0.0730506
GO:0005697	telomerase holoenzyme complex	cellular_component	0.027422	0.114748		GO:0019233	sensory perception of pain	biological_process	0.0121637	0.0730506
GO:0015923	mannosidase activity	molecular_function	0.0146398	0.115221		GO:0060191	regulation of lipase activity	biological_process	0.0121637	0.0730506
GO:0031434	mitogen-activated protein kinase kinase binding	molecular_function	0.0146398	0.115221		GO:0060840	artery development	biological_process	0.0121637	0.0730506
GO:0003725	double-stranded RNA binding	molecular_function	0.014725	0.115221		GO:0005923	bicellular tight junction	cellular_component	0.00776223	0.0732097
GO:0019898	extrinsic component of membrane	cellular_component	0.0278536	0.115864		GO:0032432	actin filament bundle	cellular_component	0.00790406	0.0732097
GO:0006575	cellular modified amino acid metabolic process	biological_process	0.014607	0.11595		GO:0045334	clathrin-coated endocytic vesicle	cellular_component	0.00790406	0.0732097
GO:0000959	mitochondrial RNA metabolic process	biological_process	0.0146723	0.11599		GO:0031528	microvillus membrane	cellular_component	0.00806277	0.0734752
GO:0006101	citrate metabolic process	biological_process	0.0146723	0.11599		GO:0030004	cellular monovalent inorganic cation homeostasis	biological_process	0.0123046	0.0738136
GO:1901031	regulation of response to reactive oxygen species	biological_process	0.0146723	0.11599		GO:0033017	sarcoplasmic reticulum membrane	cellular_component	0.00831381	0.0744538
GO:0030663	COPI-coated vesicle membrane	cellular_component	0.0281442	0.116385		GO:0045121	membrane raft	cellular_component	0.0084337	0.0744538
GO:0051568	histone H3-K4 methylation	biological_process	0.0149749	0.117966		GO:0014074	response to purine-containing compound	biological_process	0.0124415	0.0745509
GO:0006282	regulation of DNA repair	biological_process	0.0149782	0.117966		GO:0033267	axon part	cellular_component	0.00860533	0.0748002
GO:1903844	regulation of cellular response to transforming growth factor beta stimulus	biological_process	0.0149836	0.117966		GO:0061387	regulation of extent of cell growth	biological_process	0.0125008	0.0748216
GO:0031490	chromatin DNA binding	molecular_function	0.0156504	0.118816		GO:0015078	hydrogen ion transmembrane transporter activity	molecular_function	0.00687448	0.0749081
GO:0000049	tRNA binding	molecular_function	0.0159747	0.118816		GO:0003007	heart morphogenesis	biological_process	0.0125397	0.0749703
GO:0003678	DNA helicase activity	molecular_function	0.0159747	0.118816		GO:0001786	phosphatidylserine binding	molecular_function	0.00712676	0.075912
GO:0008408	3'-5' exonuclease activity	molecular_function	0.0159747	0.118816		GO:0044769	ATPase activity, coupled to transmembrane movement of ions, rotational mechanism	molecular_function	0.00712676	0.075912
GO:0070063	RNA polymerase binding	molecular_function	0.0159747	0.118816		GO:0098857	membrane microdomain	cellular_component	0.00891546	0.0763218
GO:0003899	DNA-directed 5'-3' RNA polymerase activity	molecular_function	0.0160711	0.118816		GO:0042632	cholesterol homeostasis	biological_process	0.0131957	0.0768997
GO:0004712	protein serine/threonine/tyrosine kinase activity	molecular_function	0.0160711	0.118816		GO:0051881	regulation of mitochondrial membrane potential	biological_process	0.0131957	0.0768997
GO:0050681	androgen receptor binding	molecular_function	0.0160711	0.118816		GO:0055092	sterol homeostasis	biological_process	0.0131957	0.0768997
GO:0031312	extrinsic component of organelle membrane	cellular_component	0.0290206	0.11892		GO:0072395	signal transduction involved in cell cycle checkpoint	biological_process	0.0131957	0.0768997
GO:0035578	azurophil granule lumen	cellular_component	0.0293838	0.11892		GO:0072401	signal transduction involved in DNA integrity checkpoint	biological_process	0.0131957	0.0768997
GO:0018995	host	cellular_component	0.0294813	0.11892		GO:0072422	signal transduction involved in DNA damage checkpoint	biological_process	0.0131957	0.0768997
GO:0043657	host cell	cellular_component	0.0294813	0.11892		GO:0070098	chemokine-mediated signaling pathway	biological_process	0.0132011	0.0768997
GO:0060205	cytoplasmic vesicle lumen	cellular_component	0.0296032	0.11892		GO:0032467	positive regulation of cytokinesis	biological_process	0.0132204	0.0768997
GO:0031648	protein destabilization	biological_process	0.0151393	0.119028		GO:0036296	response to increased oxygen levels	biological_process	0.0132204	0.0768997
GO:0031098	stress-activated protein kinase signaling cascade	biological_process	0.0152066	0.119394		GO:0042572	retinol metabolic process	biological_process	0.0132204	0.0768997
GO:0051056	regulation of small GTPase mediated signal transduction	biological_process	0.0152436	0.119522		GO:0043954	cellular component maintenance	biological_process	0.0132204	0.0768997
GO:0035497	cAMP response element binding	molecular_function	0.0164237	0.11977		GO:0048147	negative regulation of fibroblast proliferation	biological_process	0.0132204	0.0768997
GO:0043422	protein kinase B binding	molecular_function	0.0164237	0.11977		GO:0090022	regulation of neutrophil chemotaxis	biological_process	0.0132204	0.0768997
GO:0034250	positive regulation of cellular amide metabolic process	biological_process	0.0153393	0.120109		GO:1901890	positive regulation of cell junction assembly	biological_process	0.0132204	0.0768997
GO:0003729	mRNA binding	molecular_function	0.0165856	0.120134		GO:0006107	oxaloacetate metabolic process	biological_process	0.013311	0.0768997
GO:1902911	protein kinase complex	cellular_component	0.0302233	0.120721		GO:0007016	cytoskeletal anchoring at plasma membrane	biological_process	0.013311	0.0768997
GO:0016769	transferase activity, transferring nitrogenous groups	molecular_function	0.0168139	0.12097		GO:0010566	regulation of ketone biosynthetic process	biological_process	0.013311	0.0768997
GO:0006997	nucleus organization	biological_process	0.0155838	0.121858		GO:0010998	regulation of translational initiation by eIF2 alpha phosphorylation	biological_process	0.013311	0.0768997
GO:0031060	regulation of histone methylation	biological_process	0.0156713	0.121906		GO:0016540	protein autoprocessing	biological_process	0.013311	0.0768997
GO:0070988	demethylation	biological_process	0.0156713	0.121906		GO:0019377	glycolipid catabolic process	biological_process	0.013311	0.0768997
GO:0019884	antigen processing and presentation of exogenous antigen	biological_process	0.015691	0.121906		GO:0031581	hemidesmosome assembly	biological_process	0.013311	0.0768997
GO:0072524	pyridine-containing compound metabolic process	biological_process	0.015691	0.121906		GO:0032060	bleb assembly	biological_process	0.013311	0.0768997
GO:0090130	tissue migration	biological_process	0.0157323	0.121906		GO:0032464	positive regulation of protein homooligomerization	biological_process	0.013311	0.0768997
GO:0051567	histone H3-K9 methylation	biological_process	0.0157557	0.121906		GO:0033197	response to vitamin E	biological_process	0.013311	0.0768997
GO:2000826	regulation of heart morphogenesis	biological_process	0.0157557	0.121906		GO:0045838	positive regulation of membrane potential	biological_process	0.013311	0.0768997
GO:0007045	cell-substrate adherens junction assembly	biological_process	0.0157804	0.121906		GO:0072216	positive regulation of metanephros development	biological_process	0.013311	0.0768997
GO:0048041	focal adhesion assembly	biological_process	0.0157804	0.121906		GO:1900115	extracellular regulation of signal transduction	biological_process	0.013311	0.0768997
GO:0035970	peptidyl-threonine dephosphorylation	biological_process	0.015914	0.122073		GO:1900116	extracellular negative regulation of signal transduction	biological_process	0.013311	0.0768997
GO:0046607	positive regulation of centrosome cycle	biological_process	0.015914	0.122073		GO:1901722	regulation of cell proliferation involved in kidney development	biological_process	0.013311	0.0768997
GO:0051764	actin crosslink formation	biological_process	0.015914	0.122073		GO:1904994	regulation of leukocyte adhesion to vascular endothelial cell	biological_process	0.013311	0.0768997
GO:0061158	3'-UTR-mediated mRNA destabilization	biological_process	0.015914	0.122073		GO:2000574	regulation of microtubule motor activity	biological_process	0.013311	0.0768997
GO:0090399	replicative senescence	biological_process	0.015914	0.122073		GO:0021700	developmental maturation	biological_process	0.0134238	0.0774675
GO:0009100	glycoprotein metabolic process	biological_process	0.0159291	0.122073		GO:0060828	regulation of canonical Wnt signaling pathway	biological_process	0.0134677	0.0776363
GO:0007063	regulation of sister chromatid cohesion	biological_process	0.0161423	0.122567		GO:0001889	liver development	biological_process	0.0134878	0.0776683
GO:0034453	microtubule anchoring	biological_process	0.0161423	0.122567		GO:0015711	organic anion transport	biological_process	0.0135802	0.0781158
GO:0035561	regulation of chromatin binding	biological_process	0.0161423	0.122567		GO:1904951	positive regulation of establishment of protein localization	biological_process	0.0136113	0.0782098
GO:0036499	PERK-mediated unfolded protein response	biological_process	0.0161423	0.122567		GO:0005976	polysaccharide metabolic process	biological_process	0.0136949	0.0785202
GO:0044788	modulation by host of viral process	biological_process	0.0161423	0.122567		GO:0048593	camera-type eye morphogenesis	biological_process	0.0136949	0.0785202
GO:0070932	histone H3 deacetylation	biological_process	0.0161423	0.122567		GO:0002548	monocyte chemotaxis	biological_process	0.0137676	0.0785781
GO:0090169	regulation of spindle assembly	biological_process	0.0161423	0.122567		GO:0010470	regulation of gastrulation	biological_process	0.0137676	0.0785781
GO:0008630	intrinsic apoptotic signaling pathway in response to DNA damage	biological_process	0.0163578	0.12372		GO:0033628	regulation of cell adhesion mediated by integrin	biological_process	0.0137676	0.0785781
GO:0048525	negative regulation of viral process	biological_process	0.0163578	0.12372		GO:0032869	cellular response to insulin stimulus	biological_process	0.0137806	0.0785781
GO:0010569	regulation of double-strand break repair via homologous recombination	biological_process	0.0164016	0.12372		GO:0048588	developmental cell growth	biological_process	0.0137806	0.0785781
GO:0061615	glycolytic process through fructose-6-phosphate	biological_process	0.0164016	0.12372		GO:0006919	activation of cysteine-type endopeptidase activity involved in apoptotic process	biological_process	0.0137937	0.0785781
GO:0061620	glycolytic process through glucose-6-phosphate	biological_process	0.0164016	0.12372		GO:0050729	positive regulation of inflammatory response	biological_process	0.0138107	0.0785906
GO:1903146	regulation of mitophagy	biological_process	0.01645	0.123923		GO:0004857	enzyme inhibitor activity	molecular_function	0.00747154	0.0786843
GO:0000313	organellar ribosome	cellular_component	0.0315126	0.124457		GO:0019829	cation-transporting ATPase activity	molecular_function	0.0077643	0.0786843
GO:0005761	mitochondrial ribosome	cellular_component	0.0315126	0.124457		GO:0005161	platelet-derived growth factor receptor binding	molecular_function	0.00780202	0.0786843
GO:0005741	mitochondrial outer membrane	cellular_component	0.0317116	0.124543		GO:0008191	metalloendopeptidase inhibitor activity	molecular_function	0.00780202	0.0786843
GO:0003279	cardiac septum development	biological_process	0.0165599	0.124588		GO:0043395	heparan sulfate proteoglycan binding	molecular_function	0.00780202	0.0786843
GO:0009314	response to radiation	biological_process	0.0166588	0.125169		GO:0002224	toll-like receptor signaling pathway	biological_process	0.013947	0.0792814
GO:0010821	regulation of mitochondrion organization	biological_process	0.0167647	0.125422		GO:0021537	telencephalon development	biological_process	0.0142854	0.0811184
GO:0006296	nucleotide-excision repair, DNA incision, 5'-to lesion	biological_process	0.0168013	0.125422		GO:0034332	adherens junction organization	biological_process	0.0143685	0.0815033
GO:0006734	NADH metabolic process	biological_process	0.0168013	0.125422		GO:1901215	negative regulation of neuron death	biological_process	0.0145017	0.0821712
GO:0035337	fatty-acyl-CoA metabolic process	biological_process	0.0168013	0.125422		GO:0010644	cell communication by electrical coupling	biological_process	0.0145706	0.0822108
GO:0042769	DNA damage response, detection of DNA damage	biological_process	0.0168013	0.125422		GO:0048103	somatic stem cell division	biological_process	0.0145706	0.0822108
GO:0006984	ER-nucleus signaling pathway	biological_process	0.0169063	0.12602		GO:0050820	positive regulation of coagulation	biological_process	0.0145706	0.0822108
GO:0071230	cellular response to amino acid stimulus	biological_process	0.0169251	0.12602		GO:0051882	mitochondrial depolarization	biological_process	0.0145706	0.0822108
GO:0046540	U4/U6 x U5 tri-snRNP complex	cellular_component	0.0324125	0.126589		GO:0030276	clathrin binding	molecular_function	0.00825159	0.0823422
GO:0008154	actin polymerization or depolymerization	biological_process	0.017133	0.127268		GO:0071214	cellular response to abiotic stimulus	biological_process	0.0146781	0.0827298
GO:0051962	positive regulation of nervous system development	biological_process	0.0171368	0.127268		GO:0045111	intermediate filament cytoskeleton	cellular_component	0.0098202	0.0828122
GO:0000784	nuclear chromosome, telomeric region	cellular_component	0.033274	0.128567		GO:0008237	metallopeptidase activity	molecular_function	0.00838993	0.0828246
GO:0031228	intrinsic component of Golgi membrane	cellular_component	0.0332848	0.128567		GO:0050786	RAGE receptor binding	molecular_function	0.00847467	0.0828246
GO:0042058	regulation of epidermal growth factor receptor signaling pathway	biological_process	0.0173402	0.128612		GO:0042471	ear morphogenesis	biological_process	0.0147364	0.0829705
GO:0004860	protein kinase inhibitor activity	molecular_function	0.018046	0.128969		GO:0042440	pigment metabolic process	biological_process	0.0148346	0.0834347
GO:0035567	non-canonical Wnt signaling pathway	biological_process	0.0174358	0.129155		GO:0050792	regulation of viral process	biological_process	0.0150061	0.0836093
GO:0098781	ncRNA transcription	biological_process	0.0177394	0.131235		GO:0002719	negative regulation of cytokine production involved in immune response	biological_process	0.0150544	0.0836093
GO:0032147	activation of protein kinase activity	biological_process	0.0177696	0.13129		GO:0006825	copper ion transport	biological_process	0.0150544	0.0836093
GO:0000731	DNA synthesis involved in DNA repair	biological_process	0.0179257	0.132104		GO:0032366	intracellular sterol transport	biological_process	0.0150544	0.0836093
GO:0046823	negative regulation of nucleocytoplasmic transport	biological_process	0.0179257	0.132104		GO:0032367	intracellular cholesterol transport	biological_process	0.0150544	0.0836093
GO:0101005	ubiquitinyl hydrolase activity	molecular_function	0.0186839	0.132643		GO:0033158	regulation of protein import into nucleus, translocation	biological_process	0.0150544	0.0836093
GO:0005770	late endosome	cellular_component	0.0345522	0.132733		GO:0035024	negative regulation of Rho protein signal transduction	biological_process	0.0150544	0.0836093
GO:0051656	establishment of organelle localization	biological_process	0.0181865	0.133848		GO:0046597	negative regulation of viral entry into host cell	biological_process	0.0150544	0.0836093
GO:0001649	osteoblast differentiation	biological_process	0.0182087	0.133848		GO:0071636	positive regulation of transforming growth factor beta production	biological_process	0.0150544	0.0836093
GO:0000460	maturation of 5.8S rRNA	biological_process	0.0184016	0.134239		GO:0072170	metanephric tubule development	biological_process	0.0150544	0.0836093
GO:0009303	rRNA transcription	biological_process	0.0184016	0.134239		GO:0097067	cellular response to thyroid hormone stimulus	biological_process	0.0150544	0.0836093
GO:0033865	nucleoside bisphosphate metabolic process	biological_process	0.0184016	0.134239		GO:1903055	positive regulation of extracellular matrix organization	biological_process	0.0150544	0.0836093
GO:0033875	ribonucleoside bisphosphate metabolic process	biological_process	0.0184016	0.134239		GO:0006940	regulation of smooth muscle contraction	biological_process	0.0151221	0.0836592
GO:0034032	purine nucleoside bisphosphate metabolic process	biological_process	0.0184016	0.134239		GO:0048872	homeostasis of number of cells	biological_process	0.0151328	0.0836592
GO:0043001	Golgi to plasma membrane protein transport	biological_process	0.0184016	0.134239		GO:0072006	nephron development	biological_process	0.0151355	0.0836592
GO:0009895	negative regulation of catabolic process	biological_process	0.018462	0.134509		GO:0072175	epithelial tube formation	biological_process	0.0151355	0.0836592
GO:0030126	COPI vesicle coat	cellular_component	0.0352142	0.134541		GO:0014812	muscle cell migration	biological_process	0.0151736	0.0836592
GO:0030099	myeloid cell differentiation	biological_process	0.0185054	0.134655		GO:0048709	oligodendrocyte differentiation	biological_process	0.0151736	0.0836592
GO:0006754	ATP biosynthetic process	biological_process	0.0186996	0.135897		GO:1901216	positive regulation of neuron death	biological_process	0.0151736	0.0836592
GO:0016896	exoribonuclease activity, producing 5'-phosphomonoesters	molecular_function	0.0193584	0.136268		GO:0007569	cell aging	biological_process	0.0152245	0.0838532
GO:0016651	oxidoreductase activity, acting on NAD(P)H	molecular_function	0.0194487	0.136268		GO:1904019	epithelial cell apoptotic process	biological_process	0.0152861	0.0841051
GO:0038128	ERBB2 signaling pathway	biological_process	0.0189725	0.137092		GO:0033178	proton-transporting two-sector ATPase complex, catalytic domain	cellular_component	0.0102721	0.0853491
GO:0046825	regulation of protein export from nucleus	biological_process	0.0189725	0.137092		GO:0005518	collagen binding	molecular_function	0.0088348	0.0854632
GO:0072350	tricarboxylic acid metabolic process	biological_process	0.0189725	0.137092		GO:0048639	positive regulation of developmental growth	biological_process	0.0156261	0.0856706
GO:1901224	positive regulation of NIK/NF-kappaB signaling	biological_process	0.0189725	0.137092		GO:2001242	regulation of intrinsic apoptotic signaling pathway	biological_process	0.0156261	0.0856706
GO:0002479	antigen processing and presentation of exogenous peptide antigen via MHC class I, TAP-dependent	biological_process	0.0190069	0.137092		GO:0035023	regulation of Rho protein signal transduction	biological_process	0.0156351	0.0856706
GO:0043534	blood vessel endothelial cell migration	biological_process	0.0190069	0.137092		GO:0051494	negative regulation of cytoskeleton organization	biological_process	0.0156351	0.0856706
GO:0008180	COP9 signalosome	cellular_component	0.0363171	0.138005		GO:0002218	activation of innate immune response	biological_process	0.0157335	0.0859329
GO:0008327	methyl-CpG binding	molecular_function	0.0203585	0.138129		GO:1901565	organonitrogen compound catabolic process	biological_process	0.0157509	0.0859329
GO:0015095	magnesium ion transmembrane transporter activity	molecular_function	0.0203585	0.138129		GO:0001738	morphogenesis of a polarized epithelium	biological_process	0.0157886	0.0859329
GO:0034979	NAD-dependent protein deacetylase activity	molecular_function	0.0203585	0.138129		GO:0061008	hepaticobiliary system development	biological_process	0.0157886	0.0859329
GO:0050431	transforming growth factor beta binding	molecular_function	0.0203585	0.138129		GO:0008347	glial cell migration	biological_process	0.0158455	0.0859329
GO:0098641	cadherin binding involved in cell-cell adhesion	molecular_function	0.0203585	0.138129		GO:0001937	negative regulation of endothelial cell proliferation	biological_process	0.0159255	0.0859329
GO:0032092	positive regulation of protein binding	biological_process	0.0191921	0.138255		GO:0034142	toll-like receptor 4 signaling pathway	biological_process	0.0159255	0.0859329
GO:0016675	oxidoreductase activity, acting on a heme group of donors	molecular_function	0.0206631	0.13853		GO:0044319	wound healing, spreading of cells	biological_process	0.0159255	0.0859329
GO:0003697	single-stranded DNA binding	molecular_function	0.0206762	0.13853		GO:0048333	mesodermal cell differentiation	biological_process	0.0159255	0.0859329
GO:0051258	protein polymerization	biological_process	0.0192739	0.138671		GO:0060236	regulation of mitotic spindle organization	biological_process	0.0159255	0.0859329
GO:1901981	phosphatidylinositol phosphate binding	molecular_function	0.0208915	0.139104		GO:0071174	mitotic spindle checkpoint	biological_process	0.0159255	0.0859329
GO:2000116	regulation of cysteine-type endopeptidase activity	biological_process	0.0194018	0.139418		GO:0085029	extracellular matrix assembly	biological_process	0.0159255	0.0859329
GO:0070034	telomerase RNA binding	molecular_function	0.0212593	0.139816		GO:0090505	epiboly involved in wound healing	biological_process	0.0159255	0.0859329
GO:0070325	lipoprotein particle receptor binding	molecular_function	0.0212593	0.139816		GO:1902893	regulation of pri-miRNA transcription from RNA polymerase II promoter	biological_process	0.0159255	0.0859329
GO:0002902	regulation of B cell apoptotic process	biological_process	0.019628	0.139995		GO:1903053	regulation of extracellular matrix organization	biological_process	0.0159255	0.0859329
GO:0009070	serine family amino acid biosynthetic process	biological_process	0.019628	0.139995		GO:0050663	cytokine secretion	biological_process	0.0160111	0.0860919
GO:0015693	magnesium ion transport	biological_process	0.019628	0.139995		GO:0016054	organic acid catabolic process	biological_process	0.0160505	0.0860919
GO:0035459	cargo loading into vesicle	biological_process	0.019628	0.139995		GO:0046395	carboxylic acid catabolic process	biological_process	0.0160505	0.0860919
GO:0097320	plasma membrane tubulation	biological_process	0.019628	0.139995		GO:0002088	lens development in camera-type eye	biological_process	0.0160683	0.0860919
GO:1903830	magnesium ion transmembrane transport	biological_process	0.019628	0.139995		GO:0002753	cytoplasmic pattern recognition receptor signaling pathway	biological_process	0.0160683	0.0860919
GO:0048384	retinoic acid receptor signaling pathway	biological_process	0.0197326	0.140394		GO:0033692	cellular polysaccharide biosynthetic process	biological_process	0.0160683	0.0860919
GO:0070076	histone lysine demethylation	biological_process	0.0197326	0.140394		GO:0070227	lymphocyte apoptotic process	biological_process	0.0160683	0.0860919
GO:0034774	secretory granule lumen	cellular_component	0.037438	0.140977		GO:0005777	peroxisome	cellular_component	0.0107294	0.0866014
GO:0071013	catalytic step 2 spliceosome	cellular_component	0.0375003	0.140977		GO:0042579	microbody	cellular_component	0.0107294	0.0866014
GO:0006446	regulation of translational initiation	biological_process	0.0200914	0.142452		GO:0006775	fat-soluble vitamin metabolic process	biological_process	0.0162043	0.086733
GO:0050810	regulation of steroid biosynthetic process	biological_process	0.0200914	0.142452		GO:0006090	pyruvate metabolic process	biological_process	0.0164021	0.0877032
GO:0016073	snRNA metabolic process	biological_process	0.0201207	0.142452		GO:0005876	spindle microtubule	cellular_component	0.0110729	0.0881151
GO:0051261	protein depolymerization	biological_process	0.0201207	0.142452		GO:0006635	fatty acid beta-oxidation	biological_process	0.0166233	0.0887077
GO:0051087	chaperone binding	molecular_function	0.021842	0.142772		GO:0032602	chemokine production	biological_process	0.0166233	0.0887077
GO:0015631	tubulin binding	molecular_function	0.0219846	0.142833		GO:0030669	clathrin-coated endocytic vesicle membrane	cellular_component	0.0116129	0.0890433
GO:0004003	ATP-dependent DNA helicase activity	molecular_function	0.0222082	0.143008		GO:0031674	I band	cellular_component	0.0116694	0.0890433
GO:0032947	protein complex scaffold	molecular_function	0.0222782	0.143008		GO:0001726	ruffle	cellular_component	0.0119771	0.0890433
GO:0032587	ruffle membrane	cellular_component	0.0384253	0.143686		GO:0030122	AP-2 adaptor complex	cellular_component	0.0121351	0.0890433
GO:0043555	regulation of translation in response to stress	biological_process	0.0203977	0.143883		GO:0034663	endoplasmic reticulum chaperone complex	cellular_component	0.0121351	0.0890433
GO:0051570	regulation of histone H3-K9 methylation	biological_process	0.0203977	0.143883		GO:1990023	mitotic spindle midzone	cellular_component	0.0121351	0.0890433
GO:0071218	cellular response to misfolded protein	biological_process	0.0203977	0.143883		GO:0001657	ureteric bud development	biological_process	0.0167475	0.0891018
GO:0001101	response to acid chemical	biological_process	0.0204246	0.143896		GO:0009791	post-embryonic development	biological_process	0.0167475	0.0891018
GO:0060425	lung morphogenesis	biological_process	0.0205114	0.144331		GO:1901800	positive regulation of proteasomal protein catabolic process	biological_process	0.0167475	0.0891018
GO:0043200	response to amino acid	biological_process	0.0205514	0.144436		GO:0019217	regulation of fatty acid metabolic process	biological_process	0.0168765	0.089551
GO:0015030	Cajal body	cellular_component	0.0394368	0.146688		GO:0021782	glial cell development	biological_process	0.0168993	0.089551
GO:0044786	cell cycle DNA replication	biological_process	0.0209667	0.147175		GO:0055072	iron ion homeostasis	biological_process	0.0168993	0.089551
GO:0005684	U2-type spliceosomal complex	cellular_component	0.039833	0.147382		GO:1904668	positive regulation of ubiquitin protein ligase activity	biological_process	0.0168993	0.089551
GO:0031952	regulation of protein autophosphorylation	biological_process	0.0210996	0.147742		GO:0007586	digestion	biological_process	0.0169871	0.0899266
GO:0032008	positive regulation of TOR signaling	biological_process	0.0210996	0.147742		GO:0090287	regulation of cellular response to growth factor stimulus	biological_process	0.0170121	0.0899696
GO:0019985	translesion synthesis	biological_process	0.0211722	0.147742		GO:0006937	regulation of muscle contraction	biological_process	0.017049	0.0900749
GO:1903078	positive regulation of protein localization to plasma membrane	biological_process	0.0211722	0.147742		GO:0071674	mononuclear cell migration	biological_process	0.0172437	0.0910129
GO:0051650	establishment of vesicle localization	biological_process	0.0211756	0.147742		GO:0043177	organic acid binding	molecular_function	0.00951007	0.0910662
GO:0031334	positive regulation of protein complex assembly	biological_process	0.0212539	0.148097		GO:0070507	regulation of microtubule cytoskeleton organization	biological_process	0.0175873	0.0927345
GO:0044089	positive regulation of cellular component biogenesis	biological_process	0.0212779	0.148097		GO:0002758	innate immune response-activating signal transduction	biological_process	0.017635	0.0928938
GO:0030518	intracellular steroid hormone receptor signaling pathway	biological_process	0.0213381	0.148337		GO:0030136	clathrin-coated vesicle	cellular_component	0.0128677	0.0932081
GO:0044448	cell cortex part	cellular_component	0.0409245	0.149125		GO:2001056	positive regulation of cysteine-type endopeptidase activity	biological_process	0.0177498	0.0934061
GO:0030670	phagocytic vesicle membrane	cellular_component	0.04111	0.149125		GO:0051403	stress-activated MAPK cascade	biological_process	0.0177696	0.0934178
GO:0044445	cytosolic part	cellular_component	0.0411342	0.149125		GO:0044449	contractile fiber part	cellular_component	0.0131086	0.0937511
GO:0016591	DNA-directed RNA polymerase II, holoenzyme	cellular_component	0.0411527	0.149125		GO:0005516	calmodulin binding	molecular_function	0.00991702	0.0940134
GO:0019013	viral nucleocapsid	cellular_component	0.0417335	0.150455		GO:0038024	cargo receptor activity	molecular_function	0.0100169	0.0940196
GO:0051817	modification of morphology or physiology of other organism involved in symbiotic interaction	biological_process	0.0219782	0.152523		GO:0032350	regulation of hormone metabolic process	biological_process	0.0179696	0.0940969
GO:0050772	positive regulation of axonogenesis	biological_process	0.0220197	0.152523		GO:0046835	carbohydrate phosphorylation	biological_process	0.0179696	0.0940969
GO:2001057	reactive nitrogen species metabolic process	biological_process	0.0220197	0.152523		GO:0090023	positive regulation of neutrophil chemotaxis	biological_process	0.0179696	0.0940969
GO:0003906	DNA-(apurinic or apyrimidinic site) lyase activity	molecular_function	0.024344	0.152612		GO:1903393	positive regulation of adherens junction organization	biological_process	0.0179696	0.0940969
GO:0004559	alpha-mannosidase activity	molecular_function	0.024344	0.152612		GO:0042446	hormone biosynthetic process	biological_process	0.0181103	0.0947405
GO:0005545	1-phosphatidylinositol binding	molecular_function	0.024344	0.152612		GO:0043492	ATPase activity, coupled to movement of substances	molecular_function	0.0104504	0.095066
GO:0017110	nucleoside-diphosphatase activity	molecular_function	0.024344	0.152612		GO:0004602	glutathione peroxidase activity	molecular_function	0.0105295	0.095066
GO:0008138	protein tyrosine/serine/threonine phosphatase activity	molecular_function	0.0247528	0.154273		GO:0046965	retinoid X receptor binding	molecular_function	0.0105295	0.095066
GO:0035384	thioester biosynthetic process	biological_process	0.0223345	0.154333		GO:0072349	modified amino acid transmembrane transporter activity	molecular_function	0.0105295	0.095066
GO:0071616	acyl-CoA biosynthetic process	biological_process	0.0223345	0.154333		GO:0010463	mesenchymal cell proliferation	biological_process	0.018257	0.0951815
GO:0000813	ESCRT I complex	cellular_component	0.0435002	0.154448		GO:0032480	negative regulation of type I interferon production	biological_process	0.018257	0.0951815
GO:0016442	RISC complex	cellular_component	0.0435002	0.154448		GO:0051058	negative regulation of small GTPase mediated signal transduction	biological_process	0.018257	0.0951815
GO:0034663	endoplasmic reticulum chaperone complex	cellular_component	0.0435002	0.154448		GO:0046916	cellular transition metal ion homeostasis	biological_process	0.0183845	0.0951815
GO:0035091	phosphatidylinositol binding	molecular_function	0.0250196	0.154594		GO:0072163	mesonephric epithelium development	biological_process	0.0183845	0.0951815
GO:0098631	protein binding involved in cell adhesion	molecular_function	0.0250926	0.154594		GO:0072164	mesonephric tubule development	biological_process	0.0183845	0.0951815
GO:0008276	protein methyltransferase activity	molecular_function	0.0252399	0.154612		GO:0002689	negative regulation of leukocyte chemotaxis	biological_process	0.0185528	0.0951815
GO:0002753	cytoplasmic pattern recognition receptor signaling pathway	biological_process	0.0224878	0.155207		GO:0007171	activation of transmembrane receptor protein tyrosine kinase activity	biological_process	0.0185528	0.0951815
GO:0006661	phosphatidylinositol biosynthetic process	biological_process	0.0225308	0.155317		GO:0010755	regulation of plasminogen activation	biological_process	0.0185528	0.0951815
GO:0043015	gamma-tubulin binding	molecular_function	0.0258215	0.157276		GO:0017014	protein nitrosylation	biological_process	0.0185528	0.0951815
GO:0005751	mitochondrial respiratory chain complex IV	cellular_component	0.0448958	0.157809		GO:0018119	peptidyl-cysteine S-nitrosylation	biological_process	0.0185528	0.0951815
GO:0044232	organelle membrane contact site	cellular_component	0.0448958	0.157809		GO:0034310	primary alcohol catabolic process	biological_process	0.0185528	0.0951815
GO:0016577	histone demethylation	biological_process	0.0231329	0.159087		GO:0034375	high-density lipoprotein particle remodeling	biological_process	0.0185528	0.0951815
GO:0043954	cellular component maintenance	biological_process	0.0231329	0.159087		GO:0038065	collagen-activated signaling pathway	biological_process	0.0185528	0.0951815
GO:0046890	regulation of lipid biosynthetic process	biological_process	0.023192	0.159303		GO:0042659	regulation of cell fate specification	biological_process	0.0185528	0.0951815
GO:0070530	K63-linked polyubiquitin binding	molecular_function	0.0263092	0.159342		GO:0043217	myelin maintenance	biological_process	0.0185528	0.0951815
GO:0002224	toll-like receptor signaling pathway	biological_process	0.0232599	0.159477		GO:0046514	ceramide catabolic process	biological_process	0.0185528	0.0951815
GO:1902593	single-organism nuclear import	biological_process	0.0232839	0.159477		GO:0051988	regulation of attachment of spindle microtubules to kinetochore	biological_process	0.0185528	0.0951815
GO:0035690	cellular response to drug	biological_process	0.0233003	0.159477		GO:1900025	negative regulation of substrate adhesion-dependent cell spreading	biological_process	0.0185528	0.0951815
GO:0000060	protein import into nucleus, translocation	biological_process	0.0233885	0.159702		GO:2000696	regulation of epithelial cell differentiation involved in kidney development	biological_process	0.0185528	0.0951815
GO:0051220	cytoplasmic sequestering of protein	biological_process	0.0233885	0.159702		GO:0071887	leukocyte apoptotic process	biological_process	0.0186391	0.095532
GO:0016197	endosomal transport	biological_process	0.0235421	0.160001		GO:0090559	regulation of membrane permeability	biological_process	0.0187205	0.0957646
GO:0006086	acetyl-CoA biosynthetic process from pyruvate	biological_process	0.0235712	0.160001		GO:1902882	regulation of response to oxidative stress	biological_process	0.0187205	0.0957646
GO:0034975	protein folding in endoplasmic reticulum	biological_process	0.0235712	0.160001		GO:0060491	regulation of cell projection assembly	biological_process	0.0189101	0.0961785
GO:0090177	establishment of planar polarity involved in neural tube closure	biological_process	0.0235712	0.160001		GO:0035850	epithelial cell differentiation involved in kidney development	biological_process	0.0189374	0.0961785
GO:1901673	regulation of mitotic spindle assembly	biological_process	0.0235712	0.160001		GO:0043551	regulation of phosphatidylinositol 3-kinase activity	biological_process	0.0189374	0.0961785
GO:0000287	magnesium ion binding	molecular_function	0.0265796	0.160075		GO:0045104	intermediate filament cytoskeleton organization	biological_process	0.0189374	0.0961785
GO:0098589	membrane region	cellular_component	0.0459289	0.160637		GO:0001990	regulation of systemic arterial blood pressure by hormone	biological_process	0.0190005	0.0961785
GO:0048524	positive regulation of viral process	biological_process	0.023737	0.160937		GO:0010039	response to iron ion	biological_process	0.0190005	0.0961785
GO:0045429	positive regulation of nitric oxide biosynthetic process	biological_process	0.0238278	0.161002		GO:0010574	regulation of vascular endothelial growth factor production	biological_process	0.0190005	0.0961785
GO:1904407	positive regulation of nitric oxide metabolic process	biological_process	0.0238278	0.161002		GO:0010765	positive regulation of sodium ion transport	biological_process	0.0190005	0.0961785
GO:1903902	positive regulation of viral life cycle	biological_process	0.0238304	0.161002		GO:0045841	negative regulation of mitotic metaphase/anaphase transition	biological_process	0.0190005	0.0961785
GO:0048285	organelle fission	biological_process	0.0239393	0.161542		GO:0090504	epiboly	biological_process	0.0190005	0.0961785
GO:0043281	regulation of cysteine-type endopeptidase activity involved in apoptotic process	biological_process	0.0239665	0.161542		GO:1902100	negative regulation of metaphase/anaphase transition of cell cycle	biological_process	0.0190005	0.0961785
GO:1902117	positive regulation of organelle assembly	biological_process	0.0240106	0.161651		GO:0043900	regulation of multi-organism process	biological_process	0.01906	0.0963881
GO:0006650	glycerophospholipid metabolic process	biological_process	0.0240441	0.161688		GO:0010977	negative regulation of neuron projection development	biological_process	0.019182	0.0965913
GO:0000295	adenine nucleotide transmembrane transporter activity	molecular_function	0.0283869	0.161865		GO:0032331	negative regulation of chondrocyte differentiation	biological_process	0.0193183	0.0965913
GO:0005346	purine ribonucleotide transmembrane transporter activity	molecular_function	0.0283869	0.161865		GO:0032373	positive regulation of sterol transport	biological_process	0.0193183	0.0965913
GO:0016273	arginine N-methyltransferase activity	molecular_function	0.0283869	0.161865		GO:0032376	positive regulation of cholesterol transport	biological_process	0.0193183	0.0965913
GO:0016274	protein-arginine N-methyltransferase activity	molecular_function	0.0283869	0.161865		GO:0033189	response to vitamin A	biological_process	0.0193183	0.0965913
GO:0017070	U6 snRNA binding	molecular_function	0.0283869	0.161865		GO:0033194	response to hydroperoxide	biological_process	0.0193183	0.0965913
GO:0031078	histone deacetylase activity (H3-K14 specific)	molecular_function	0.0283869	0.161865		GO:0034114	regulation of heterotypic cell-cell adhesion	biological_process	0.0193183	0.0965913
GO:0032041	NAD-dependent histone deacetylase activity (H3-K14 specific)	molecular_function	0.0283869	0.161865		GO:0035338	long-chain fatty-acyl-CoA biosynthetic process	biological_process	0.0193183	0.0965913
GO:0035925	mRNA 3'-UTR AU-rich region binding	molecular_function	0.0283869	0.161865		GO:0039529	RIG-I signaling pathway	biological_process	0.0193183	0.0965913
GO:0043295	glutathione binding	molecular_function	0.0283869	0.161865		GO:0045109	intermediate filament organization	biological_process	0.0193183	0.0965913
GO:1900750	oligopeptide binding	molecular_function	0.0283869	0.161865		GO:0072111	cell proliferation involved in kidney development	biological_process	0.0193183	0.0965913
GO:0002011	morphogenesis of an epithelial sheet	biological_process	0.024163	0.16192		GO:0072243	metanephric nephron epithelium development	biological_process	0.0193183	0.0965913
GO:0006301	postreplication repair	biological_process	0.024163	0.16192		GO:0046934	phosphatidylinositol-4,5-bisphosphate 3-kinase activity	molecular_function	0.0108097	0.0966754
GO:1901222	regulation of NIK/NF-kappaB signaling	biological_process	0.024163	0.16192		GO:0010633	negative regulation of epithelial cell migration	biological_process	0.019577	0.0974217
GO:0033135	regulation of peptidyl-serine phosphorylation	biological_process	0.0245278	0.163948		GO:0016266	O-glycan processing	biological_process	0.019577	0.0974217
GO:0034637	cellular carbohydrate biosynthetic process	biological_process	0.0245794	0.163948		GO:0071385	cellular response to glucocorticoid stimulus	biological_process	0.019577	0.0974217
GO:1901216	positive regulation of neuron death	biological_process	0.0245794	0.163948		GO:1901222	regulation of NIK/NF-kappaB signaling	biological_process	0.019577	0.0974217
GO:1901989	positive regulation of cell cycle phase transition	biological_process	0.0245794	0.163948		GO:1903362	regulation of cellular protein catabolic process	biological_process	0.0195836	0.0974217
GO:0006735	NADH regeneration	biological_process	0.0247603	0.164394		GO:0032147	activation of protein kinase activity	biological_process	0.0195943	0.0974217
GO:0061621	canonical glycolysis	biological_process	0.0247603	0.164394		GO:0008630	intrinsic apoptotic signaling pathway in response to DNA damage	biological_process	0.0196477	0.0975049
GO:0061718	glucose catabolic process to pyruvate	biological_process	0.0247603	0.164394		GO:0055088	lipid homeostasis	biological_process	0.0196477	0.0975049
GO:0071480	cellular response to gamma radiation	biological_process	0.0247603	0.164394		GO:0044297	cell body	cellular_component	0.0140689	0.0993613
GO:0046777	protein autophosphorylation	biological_process	0.0247892	0.164396		GO:0002761	regulation of myeloid leukocyte differentiation	biological_process	0.0201408	0.0997657
GO:0004843	thiol-dependent ubiquitin-specific protease activity	molecular_function	0.0291985	0.165613		GO:0014020	primary neural tube formation	biological_process	0.0201408	0.0997657
GO:0006644	phospholipid metabolic process	biological_process	0.0252719	0.166525		GO:0000075	cell cycle checkpoint	biological_process	0.0201753	0.0998434
GO:0006085	acetyl-CoA biosynthetic process	biological_process	0.0253487	0.166525		GO:0051222	positive regulation of protein transport	biological_process	0.0202274	0.100008
GO:0033522	histone H2A ubiquitination	biological_process	0.0253487	0.166525		GO:1902105	regulation of leukocyte differentiation	biological_process	0.0202477	0.100016
GO:0035886	vascular smooth muscle cell differentiation	biological_process	0.0253487	0.166525		GO:0015171	amino acid transmembrane transporter activity	molecular_function	0.0113178	0.100273
GO:0042276	error-prone translesion synthesis	biological_process	0.0253487	0.166525		GO:0008593	regulation of Notch signaling pathway	biological_process	0.0203389	0.10028
GO:0070734	histone H3-K27 methylation	biological_process	0.0253487	0.166525		GO:1902108	regulation of mitochondrial membrane permeability involved in apoptotic process	biological_process	0.0203389	0.10028
GO:0098780	response to mitochondrial depolarisation	biological_process	0.0253487	0.166525		GO:0010948	negative regulation of cell cycle process	biological_process	0.0203866	0.100421
GO:1902254	negative regulation of intrinsic apoptotic signaling pathway by p53 class mediator	biological_process	0.0253487	0.166525		GO:0010721	negative regulation of cell development	biological_process	0.0206201	0.101478
GO:0007249	I-kappaB kinase/NF-kappaB signaling	biological_process	0.0253986	0.166525		GO:0032612	interleukin-1 production	biological_process	0.0206817	0.101593
GO:0017038	protein import	biological_process	0.0253993	0.166525		GO:0045445	myoblast differentiation	biological_process	0.0206817	0.101593
GO:0009615	response to virus	biological_process	0.0255629	0.167347		GO:0001656	metanephros development	biological_process	0.0207121	0.101648
GO:0007029	endoplasmic reticulum organization	biological_process	0.0256117	0.167347		GO:0030850	prostate gland development	biological_process	0.0209244	0.102595
GO:1905268	negative regulation of chromatin organization	biological_process	0.0256117	0.167347		GO:0004869	cysteine-type endopeptidase inhibitor activity	molecular_function	0.0120466	0.103033
GO:0090559	regulation of membrane permeability	biological_process	0.0258554	0.168748		GO:0015179	L-amino acid transmembrane transporter activity	molecular_function	0.0120466	0.103033
GO:0004129	cytochrome-c oxidase activity	molecular_function	0.0304283	0.169011		GO:0015291	secondary active transmembrane transporter activity	molecular_function	0.0123862	0.103033
GO:0015002	heme-copper terminal oxidase activity	molecular_function	0.0304283	0.169011		GO:0005536	glucose binding	molecular_function	0.01239	0.103033
GO:0016676	oxidoreductase activity, acting on a heme group of donors, oxygen as acceptor	molecular_function	0.0304283	0.169011		GO:0035615	clathrin adaptor activity	molecular_function	0.01239	0.103033
GO:0030507	spectrin binding	molecular_function	0.0304283	0.169011		GO:0043295	glutathione binding	molecular_function	0.01239	0.103033
GO:0060541	respiratory system development	biological_process	0.0260079	0.169551		GO:0098748	endocytic adaptor activity	molecular_function	0.01239	0.103033
GO:0019362	pyridine nucleotide metabolic process	biological_process	0.0262344	0.170642		GO:0020037	heme binding	molecular_function	0.0128694	0.105174
GO:0046496	nicotinamide nucleotide metabolic process	biological_process	0.0262344	0.170642		GO:0046943	carboxylic acid transmembrane transporter activity	molecular_function	0.0128694	0.105174
GO:0015036	disulfide oxidoreductase activity	molecular_function	0.0308934	0.17071		GO:0030374	ligand-dependent nuclear receptor transcription coactivator activity	molecular_function	0.013216	0.105478
GO:0030178	negative regulation of Wnt signaling pathway	biological_process	0.0264404	0.171244		GO:0042562	hormone binding	molecular_function	0.013216	0.105478
GO:0006606	protein import into nucleus	biological_process	0.0265313	0.171244		GO:0017134	fibroblast growth factor binding	molecular_function	0.0132404	0.105478
GO:0044744	protein targeting to nucleus	biological_process	0.0265313	0.171244		GO:0035051	cardiocyte differentiation	biological_process	0.0215914	0.105768
GO:0006099	tricarboxylic acid cycle	biological_process	0.0265654	0.171244		GO:0060351	cartilage development involved in endochondral bone morphogenesis	biological_process	0.021874	0.106792
GO:0098534	centriole assembly	biological_process	0.0265654	0.171244		GO:0060441	epithelial tube branching involved in lung morphogenesis	biological_process	0.021874	0.106792
GO:0000462	maturation of SSU-rRNA from tricistronic rRNA transcript (SSU-rRNA, 5.8S rRNA, LSU-rRNA)	biological_process	0.0265684	0.171244		GO:0097066	response to thyroid hormone	biological_process	0.021874	0.106792
GO:0032527	protein exit from endoplasmic reticulum	biological_process	0.0265684	0.171244		GO:0010518	positive regulation of phospholipase activity	biological_process	0.0219842	0.106792
GO:0045646	regulation of erythrocyte differentiation	biological_process	0.0265684	0.171244		GO:0010761	fibroblast migration	biological_process	0.0219842	0.106792
GO:0002444	myeloid leukocyte mediated immunity	biological_process	0.0266152	0.171244		GO:0032459	regulation of protein oligomerization	biological_process	0.0219842	0.106792
GO:0045926	negative regulation of growth	biological_process	0.0266241	0.171244		GO:0044380	protein localization to cytoskeleton	biological_process	0.0219842	0.106792
GO:0008023	transcription elongation factor complex	cellular_component	0.0492101	0.171261		GO:0045103	intermediate filament-based process	biological_process	0.0219842	0.106792
GO:0044769	ATPase activity, coupled to transmembrane movement of ions, rotational mechanism	molecular_function	0.0314673	0.172989		GO:0072350	tricarboxylic acid metabolic process	biological_process	0.0219842	0.106792
GO:0019210	kinase inhibitor activity	molecular_function	0.0322687	0.173253		GO:0001823	mesonephros development	biological_process	0.0220214	0.106792
GO:0017091	AU-rich element binding	molecular_function	0.0323338	0.173253		GO:0090101	negative regulation of transmembrane receptor protein serine/threonine kinase signaling pathway	biological_process	0.0220214	0.106792
GO:0042171	lysophosphatidic acid acyltransferase activity	molecular_function	0.0323338	0.173253		GO:0007179	transforming growth factor beta receptor signaling pathway	biological_process	0.0221609	0.10737
GO:0071617	lysophospholipid acyltransferase activity	molecular_function	0.0323338	0.173253		GO:1903533	regulation of protein targeting	biological_process	0.0222192	0.107555
GO:0017136	NAD-dependent histone deacetylase activity	molecular_function	0.032485	0.173253		GO:0051147	regulation of muscle cell differentiation	biological_process	0.0224398	0.108168
GO:0046933	proton-transporting ATP synthase activity, rotational mechanism	molecular_function	0.032485	0.173253		GO:0009395	phospholipid catabolic process	biological_process	0.022468	0.108168
GO:0061180	mammary gland epithelium development	biological_process	0.0270491	0.173784		GO:0045737	positive regulation of cyclin-dependent protein serine/threonine kinase activity	biological_process	0.022468	0.108168
GO:0042590	antigen processing and presentation of exogenous peptide antigen via MHC class I	biological_process	0.0271267	0.174088		GO:0060612	adipose tissue development	biological_process	0.022468	0.108168
GO:0015992	proton transport	biological_process	0.0272071	0.17441		GO:1901099	negative regulation of signal transduction in absence of ligand	biological_process	0.022468	0.108168
GO:0031929	TOR signaling	biological_process	0.0274963	0.174828		GO:2001240	negative regulation of extrinsic apoptotic signaling pathway in absence of ligand	biological_process	0.022468	0.108168
GO:0002903	negative regulation of B cell apoptotic process	biological_process	0.0276059	0.174828		GO:0006939	smooth muscle contraction	biological_process	0.0225215	0.108168
GO:0006983	ER overload response	biological_process	0.0276059	0.174828		GO:0044264	cellular polysaccharide metabolic process	biological_process	0.0225215	0.108168
GO:0014067	negative regulation of phosphatidylinositol 3-kinase signaling	biological_process	0.0276059	0.174828		GO:0097193	intrinsic apoptotic signaling pathway	biological_process	0.0225291	0.108168
GO:0019042	viral latency	biological_process	0.0276059	0.174828		GO:0050707	regulation of cytokine secretion	biological_process	0.0228921	0.109774
GO:0034063	stress granule assembly	biological_process	0.0276059	0.174828		GO:0031571	mitotic G1 DNA damage checkpoint	biological_process	0.0229668	0.109774
GO:0035246	peptidyl-arginine N-methylation	biological_process	0.0276059	0.174828		GO:0044819	mitotic G1/S transition checkpoint	biological_process	0.0229668	0.109774
GO:0043217	myelin maintenance	biological_process	0.0276059	0.174828		GO:0045682	regulation of epidermis development	biological_process	0.0229668	0.109774
GO:0051573	negative regulation of histone H3-K9 methylation	biological_process	0.0276059	0.174828		GO:0055017	cardiac muscle tissue growth	biological_process	0.0229668	0.109774
GO:0090148	membrane fission	biological_process	0.0276059	0.174828		GO:0006091	generation of precursor metabolites and energy	biological_process	0.0231132	0.110375
GO:1903358	regulation of Golgi organization	biological_process	0.0276059	0.174828		GO:0042476	odontogenesis	biological_process	0.0232798	0.11107
GO:1900182	positive regulation of protein localization to nucleus	biological_process	0.0276561	0.174953		GO:0006766	vitamin metabolic process	biological_process	0.0233209	0.111166
GO:0097755	positive regulation of blood vessel diameter	biological_process	0.0278333	0.175881		GO:0030177	positive regulation of Wnt signaling pathway	biological_process	0.0233462	0.111187
GO:0031349	positive regulation of defense response	biological_process	0.0278772	0.175965		GO:0007409	axonogenesis	biological_process	0.023456	0.11161
GO:0045185	maintenance of protein location	biological_process	0.0287248	0.181117		GO:0030900	forebrain development	biological_process	0.0234828	0.111638
GO:0032970	regulation of actin filament-based process	biological_process	0.0288979	0.182009		GO:0042692	muscle cell differentiation	biological_process	0.0235893	0.112044
GO:0034661	ncRNA catabolic process	biological_process	0.0291608	0.183382		GO:0050994	regulation of lipid catabolic process	biological_process	0.023861	0.113233
GO:0002275	myeloid cell activation involved in immune response	biological_process	0.0291875	0.183382		GO:0072659	protein localization to plasma membrane	biological_process	0.0239539	0.113573
GO:0009108	coenzyme biosynthetic process	biological_process	0.0292906	0.183382		GO:0009267	cellular response to starvation	biological_process	0.0240178	0.113774
GO:0032873	negative regulation of stress-activated MAPK cascade	biological_process	0.0293068	0.183382		GO:0034284	response to monosaccharide	biological_process	0.0240983	0.113963
GO:0070303	negative regulation of stress-activated protein kinase signaling cascade	biological_process	0.0293068	0.183382		GO:0050714	positive regulation of protein secretion	biological_process	0.0241702	0.113963
GO:0097300	programmed necrotic cell death	biological_process	0.0293068	0.183382		GO:0010389	regulation of G2/M transition of mitotic cell cycle	biological_process	0.0242063	0.113963
GO:0035326	enhancer binding	molecular_function	0.0345647	0.183432		GO:0002544	chronic inflammatory response	biological_process	0.0243034	0.113963
GO:0042306	regulation of protein import into nucleus	biological_process	0.0294721	0.184217		GO:0006085	acetyl-CoA biosynthetic process	biological_process	0.0243034	0.113963
GO:0005547	phosphatidylinositol-3,4,5-trisphosphate binding	molecular_function	0.0350698	0.185196		GO:0045940	positive regulation of steroid metabolic process	biological_process	0.0243034	0.113963
GO:0098791	Golgi subcompartment	cellular_component	0.0537725	0.185212		GO:0048670	regulation of collateral sprouting	biological_process	0.0243034	0.113963
GO:0034719	SMN-Sm protein complex	cellular_component	0.0540093	0.185212		GO:0048799	animal organ maturation	biological_process	0.0243034	0.113963
GO:0071004	U2-type prespliceosome	cellular_component	0.0540093	0.185212		GO:0051383	kinetochore organization	biological_process	0.0243034	0.113963
GO:0030175	filopodium	cellular_component	0.0543629	0.18552		GO:0090025	regulation of monocyte chemotaxis	biological_process	0.0243034	0.113963
GO:0006637	acyl-CoA metabolic process	biological_process	0.0297834	0.185759		GO:1902254	negative regulation of intrinsic apoptotic signaling pathway by p53 class mediator	biological_process	0.0243034	0.113963
GO:0035383	thioester metabolic process	biological_process	0.0297834	0.185759		GO:0090263	positive regulation of canonical Wnt signaling pathway	biological_process	0.024315	0.113963
GO:0048029	monosaccharide binding	molecular_function	0.0354309	0.186186		GO:0046854	phosphatidylinositol phosphorylation	biological_process	0.0246756	0.114887
GO:0002756	MyD88-independent toll-like receptor signaling pathway	biological_process	0.0300014	0.186514		GO:0045089	positive regulation of innate immune response	biological_process	0.0248059	0.114887
GO:0042558	pteridine-containing compound metabolic process	biological_process	0.0300014	0.186514		GO:0001573	ganglioside metabolic process	biological_process	0.0249081	0.114887
GO:0090224	regulation of spindle organization	biological_process	0.0300014	0.186514		GO:0010642	negative regulation of platelet-derived growth factor receptor signaling pathway	biological_process	0.0249081	0.114887
GO:0071559	response to transforming growth factor beta	biological_process	0.0302233	0.187691		GO:0032486	Rap protein signal transduction	biological_process	0.0249081	0.114887
GO:0098813	nuclear chromosome segregation	biological_process	0.0305569	0.189558		GO:0032530	regulation of microvillus organization	biological_process	0.0249081	0.114887
GO:0030971	receptor tyrosine kinase binding	molecular_function	0.0365178	0.190961		GO:0033539	fatty acid beta-oxidation using acyl-CoA dehydrogenase	biological_process	0.0249081	0.114887
GO:0008250	oligosaccharyltransferase complex	cellular_component	0.0576205	0.191072		GO:0034111	negative regulation of homotypic cell-cell adhesion	biological_process	0.0249081	0.114887
GO:0030122	AP-2 adaptor complex	cellular_component	0.0576205	0.191072		GO:0043518	negative regulation of DNA damage response, signal transduction by p53 class mediator	biological_process	0.0249081	0.114887
GO:0031597	cytosolic proteasome complex	cellular_component	0.0576205	0.191072		GO:0046321	positive regulation of fatty acid oxidation	biological_process	0.0249081	0.114887
GO:0031932	TORC2 complex	cellular_component	0.0576205	0.191072		GO:0051957	positive regulation of amino acid transport	biological_process	0.0249081	0.114887
GO:0035102	PRC1 complex	cellular_component	0.0576205	0.191072		GO:0055012	ventricular cardiac muscle cell differentiation	biological_process	0.0249081	0.114887
GO:0042405	nuclear inclusion body	cellular_component	0.0576205	0.191072		GO:0071360	cellular response to exogenous dsRNA	biological_process	0.0249081	0.114887
GO:0042826	histone deacetylase binding	molecular_function	0.0368286	0.191652		GO:0072643	interferon-gamma secretion	biological_process	0.0249081	0.114887
GO:0016234	inclusion body	cellular_component	0.0584006	0.192062		GO:0090266	regulation of mitotic cell cycle spindle assembly checkpoint	biological_process	0.0249081	0.114887
GO:0030662	coated vesicle membrane	cellular_component	0.0584655	0.192062		GO:1903504	regulation of mitotic spindle checkpoint	biological_process	0.0249081	0.114887
GO:0009226	nucleotide-sugar biosynthetic process	biological_process	0.0311336	0.192908		GO:1905048	regulation of metallopeptidase activity	biological_process	0.0249081	0.114887
GO:0010212	response to ionizing radiation	biological_process	0.0312312	0.192908		GO:0051785	positive regulation of nuclear division	biological_process	0.0249228	0.114887
GO:0032042	mitochondrial DNA metabolic process	biological_process	0.0314316	0.192908		GO:0097345	mitochondrial outer membrane permeabilization	biological_process	0.0249228	0.114887
GO:0032495	response to muramyl dipeptide	biological_process	0.0314316	0.192908		GO:0016820	hydrolase activity, acting on acid anhydrides, catalyzing transmembrane movement of substances	molecular_function	0.0145577	0.115006
GO:0043651	linoleic acid metabolic process	biological_process	0.0314316	0.192908		GO:0071901	negative regulation of protein serine/threonine kinase activity	biological_process	0.0251537	0.115851
GO:0051457	maintenance of protein location in nucleus	biological_process	0.0314316	0.192908		GO:0021762	substantia nigra development	biological_process	0.0253612	0.116504
GO:0070816	phosphorylation of RNA polymerase II C-terminal domain	biological_process	0.0314316	0.192908		GO:0031103	axon regeneration	biological_process	0.0253612	0.116504
GO:1900151	regulation of nuclear-transcribed mRNA catabolic process, deadenylation-dependent decay	biological_process	0.0314316	0.192908		GO:0061028	establishment of endothelial barrier	biological_process	0.0253612	0.116504
GO:1900153	positive regulation of nuclear-transcribed mRNA catabolic process, deadenylation-dependent decay	biological_process	0.0314316	0.192908		GO:0044783	G1 DNA damage checkpoint	biological_process	0.0254326	0.11663
GO:1905331	negative regulation of morphogenesis of an epithelium	biological_process	0.0314316	0.192908		GO:0050772	positive regulation of axonogenesis	biological_process	0.0254326	0.11663
GO:0019218	regulation of steroid metabolic process	biological_process	0.0318786	0.195443		GO:0030128	clathrin coat of endocytic vesicle	cellular_component	0.0169468	0.116848
GO:0000777	condensed chromosome kinetochore	cellular_component	0.0598616	0.195734		GO:0042641	actomyosin	cellular_component	0.0169988	0.116848
GO:0042059	negative regulation of epidermal growth factor receptor signaling pathway	biological_process	0.0320313	0.196171		GO:0016471	vacuolar proton-transporting V-type ATPase complex	cellular_component	0.0173721	0.116848
GO:0043299	leukocyte degranulation	biological_process	0.0321177	0.196491		GO:0034364	high-density lipoprotein particle	cellular_component	0.0173721	0.116848
GO:0051306	mitotic sister chromatid separation	biological_process	0.0322452	0.197062		GO:1902749	regulation of cell cycle G2/M phase transition	biological_process	0.0255917	0.117258
GO:0017025	TBP-class protein binding	molecular_function	0.0383259	0.197526		GO:0003012	muscle system process	biological_process	0.0256602	0.117471
GO:0051537	2 iron, 2 sulfur cluster binding	molecular_function	0.0383259	0.197526		GO:0051051	negative regulation of transport	biological_process	0.0257782	0.11791
GO:0002039	p53 binding	molecular_function	0.0392276	0.197979		GO:0005875	microtubule associated complex	cellular_component	0.0179438	0.118722
GO:0000175	3'-5'-exoribonuclease activity	molecular_function	0.0395788	0.197979		GO:0043025	neuronal cell body	cellular_component	0.0180709	0.118722
GO:0016790	thiolester hydrolase activity	molecular_function	0.0395788	0.197979		GO:0006885	regulation of pH	biological_process	0.0261752	0.118783
GO:0098632	protein binding involved in cell-cell adhesion	molecular_function	0.0395788	0.197979		GO:0030218	erythrocyte differentiation	biological_process	0.0261752	0.118783
GO:0015929	hexosaminidase activity	molecular_function	0.0398914	0.197979		GO:0035150	regulation of tube size	biological_process	0.0262862	0.118783
GO:0033549	MAP kinase phosphatase activity	molecular_function	0.0398914	0.197979		GO:0050880	regulation of blood vessel size	biological_process	0.0262862	0.118783
GO:0043024	ribosomal small subunit binding	molecular_function	0.0398914	0.197979		GO:0014072	response to isoquinoline alkaloid	biological_process	0.0263122	0.118783
GO:1904264	ubiquitin protein ligase activity involved in ERAD pathway	molecular_function	0.0398914	0.197979		GO:0032689	negative regulation of interferon-gamma production	biological_process	0.0263122	0.118783
GO:0009416	response to light stimulus	biological_process	0.0325416	0.198663		GO:0043278	response to morphine	biological_process	0.0263122	0.118783
GO:0006790	sulfur compound metabolic process	biological_process	0.0325935	0.198769		GO:0045923	positive regulation of fatty acid metabolic process	biological_process	0.0263122	0.118783
GO:0008483	transaminase activity	molecular_function	0.0405769	0.200453		GO:0051156	glucose 6-phosphate metabolic process	biological_process	0.0263122	0.118783
GO:0008543	fibroblast growth factor receptor signaling pathway	biological_process	0.0329142	0.200512		GO:0070570	regulation of neuron projection regeneration	biological_process	0.0263122	0.118783
GO:0016835	carbon-oxygen lyase activity	molecular_function	0.0410967	0.201902		GO:0002931	response to ischemia	biological_process	0.026349	0.118783
GO:0016798	hydrolase activity, acting on glycosyl bonds	molecular_function	0.0412468	0.201902		GO:0010573	vascular endothelial growth factor production	biological_process	0.026349	0.118783
GO:0006360	transcription from RNA polymerase I promoter	biological_process	0.033227	0.202204		GO:0046850	regulation of bone remodeling	biological_process	0.026349	0.118783
GO:0001843	neural tube closure	biological_process	0.0333704	0.202649		GO:0055078	sodium ion homeostasis	biological_process	0.026349	0.118783
GO:0060606	tube closure	biological_process	0.0333704	0.202649		GO:0060338	regulation of type I interferon-mediated signaling pathway	biological_process	0.026349	0.118783
GO:0070266	necroptotic process	biological_process	0.0334186	0.202728		GO:0090224	regulation of spindle organization	biological_process	0.026349	0.118783
GO:0003209	cardiac atrium morphogenesis	biological_process	0.0335487	0.203089		GO:2000725	regulation of cardiac muscle cell differentiation	biological_process	0.026349	0.118783
GO:0007099	centriole replication	biological_process	0.0335487	0.203089		GO:1903829	positive regulation of cellular protein localization	biological_process	0.026735	0.120421
GO:0005942	phosphatidylinositol 3-kinase complex	cellular_component	0.0624959	0.203401		GO:0003712	transcription cofactor activity	molecular_function	0.0157126	0.121248
GO:0005637	nuclear inner membrane	cellular_component	0.0640529	0.206857		GO:0033613	activating transcription factor binding	molecular_function	0.0157316	0.121248
GO:0030426	growth cone	cellular_component	0.0642398	0.206857		GO:0052813	phosphatidylinositol bisphosphate kinase activity	molecular_function	0.0157316	0.121248
GO:0005911	cell-cell junction	cellular_component	0.0651242	0.206857		GO:0070268	cornification	biological_process	0.0269789	0.121416
GO:0005802	trans-Golgi network	cellular_component	0.0652724	0.206857		GO:0045604	regulation of epidermal cell differentiation	biological_process	0.0270794	0.12156
GO:0036452	ESCRT complex	cellular_component	0.0654211	0.206857		GO:0060395	SMAD protein signal transduction	biological_process	0.0270794	0.12156
GO:0030427	site of polarized growth	cellular_component	0.0654715	0.206857		GO:0060425	lung morphogenesis	biological_process	0.0270794	0.12156
GO:0005811	lipid particle	cellular_component	0.0656175	0.206857		GO:0031098	stress-activated protein kinase signaling cascade	biological_process	0.0273447	0.122647
GO:0071229	cellular response to acid chemical	biological_process	0.0343522	0.207735		GO:0010717	regulation of epithelial to mesenchymal transition	biological_process	0.0276379	0.123858
GO:0097306	cellular response to alcohol	biological_process	0.034425	0.207957		GO:0002718	regulation of cytokine production involved in immune response	biological_process	0.0279563	0.124969
GO:0043331	response to dsRNA	biological_process	0.0345015	0.208201		GO:0015914	phospholipid transport	biological_process	0.0279563	0.124969
GO:0043122	regulation of I-kappaB kinase/NF-kappaB signaling	biological_process	0.0345565	0.208315		GO:0032835	glomerulus development	biological_process	0.0279563	0.124969
GO:0043631	RNA polyadenylation	biological_process	0.0347325	0.208783		GO:0042974	retinoic acid receptor binding	molecular_function	0.0163551	0.125038
GO:0046626	regulation of insulin receptor signaling pathway	biological_process	0.0347325	0.208783		GO:0005342	organic acid transmembrane transporter activity	molecular_function	0.0165156	0.125255
GO:0006643	membrane lipid metabolic process	biological_process	0.0347428	0.208783		GO:0031406	carboxylic acid binding	molecular_function	0.0167346	0.125908
GO:0060090	binding, bridging	molecular_function	0.0440504	0.212552		GO:0030307	positive regulation of cell growth	biological_process	0.0281988	0.125947
GO:0051879	Hsp90 protein binding	molecular_function	0.0440569	0.212552		GO:0071479	cellular response to ionizing radiation	biological_process	0.0282341	0.125999
GO:0016411	acylglycerol O-acyltransferase activity	molecular_function	0.0442157	0.212552		GO:0017147	Wnt-protein binding	molecular_function	0.0171215	0.126123
GO:0044183	protein binding involved in protein folding	molecular_function	0.0442157	0.212552		GO:0017154	semaphorin receptor activity	molecular_function	0.0172954	0.126123
GO:0035591	signaling adaptor activity	molecular_function	0.0447691	0.214252		GO:0042301	phosphate ion binding	molecular_function	0.0172954	0.126123
GO:1905037	autophagosome organization	biological_process	0.0357983	0.214902		GO:1900750	oligopeptide binding	molecular_function	0.0172954	0.126123
GO:0008361	regulation of cell size	biological_process	0.0358559	0.215023		GO:0046939	nucleotide phosphorylation	biological_process	0.0283748	0.12652
GO:1900034	regulation of cellular response to heat	biological_process	0.0359544	0.215249		GO:0070613	regulation of protein processing	biological_process	0.0284582	0.126786
GO:0045727	positive regulation of translation	biological_process	0.0359683	0.215249		GO:0046578	regulation of Ras protein signal transduction	biological_process	0.0287876	0.128146
GO:0030666	endocytic vesicle membrane	cellular_component	0.0688422	0.216054		GO:0001649	osteoblast differentiation	biological_process	0.028891	0.128498
GO:0044724	single-organism carbohydrate catabolic process	biological_process	0.0362005	0.21619		GO:0031398	positive regulation of protein ubiquitination	biological_process	0.0289289	0.12856
GO:1904589	regulation of protein import	biological_process	0.0362005	0.21619		GO:0030199	collagen fibril organization	biological_process	0.0290836	0.128924
GO:0001618	virus receptor activity	molecular_function	0.045573	0.216375		GO:0045599	negative regulation of fat cell differentiation	biological_process	0.0290836	0.128924
GO:0008170	N-methyltransferase activity	molecular_function	0.0462112	0.216375		GO:0048538	thymus development	biological_process	0.0290836	0.128924
GO:0030695	GTPase regulator activity	molecular_function	0.0464658	0.216375		GO:0008584	male gonad development	biological_process	0.0291433	0.128973
GO:0051213	dioxygenase activity	molecular_function	0.0476839	0.216375		GO:0046546	development of primary male sexual characteristics	biological_process	0.0291433	0.128973
GO:0001076	transcription factor activity, RNA polymerase II transcription factor binding	molecular_function	0.0476984	0.216375		GO:0002698	negative regulation of immune effector process	biological_process	0.029437	0.130164
GO:0005543	phospholipid binding	molecular_function	0.0481648	0.216375		GO:0044089	positive regulation of cellular component biogenesis	biological_process	0.0299486	0.131325
GO:0005072	transforming growth factor beta receptor, cytoplasmic mediator activity	molecular_function	0.048344	0.216375		GO:0051962	positive regulation of nervous system development	biological_process	0.0300149	0.131325
GO:0008195	phosphatidate phosphatase activity	molecular_function	0.048344	0.216375		GO:0001516	prostaglandin biosynthetic process	biological_process	0.0300454	0.131325
GO:0008349	MAP kinase kinase kinase kinase activity	molecular_function	0.048344	0.216375		GO:0003081	regulation of systemic arterial blood pressure by renin-angiotensin	biological_process	0.0300454	0.131325
GO:0015924	mannosyl-oligosaccharide mannosidase activity	molecular_function	0.048344	0.216375		GO:0009084	glutamine family amino acid biosynthetic process	biological_process	0.0300454	0.131325
GO:0016018	cyclosporin A binding	molecular_function	0.048344	0.216375		GO:0032148	activation of protein kinase B activity	biological_process	0.0300454	0.131325
GO:0016679	oxidoreductase activity, acting on diphenols and related substances as donors	molecular_function	0.048344	0.216375		GO:0046457	prostanoid biosynthetic process	biological_process	0.0300454	0.131325
GO:0036312	phosphatidylinositol 3-kinase regulatory subunit binding	molecular_function	0.048344	0.216375		GO:0046827	positive regulation of protein export from nucleus	biological_process	0.0300454	0.131325
GO:0042301	phosphate ion binding	molecular_function	0.048344	0.216375		GO:0051187	cofactor catabolic process	biological_process	0.0300454	0.131325
GO:0098505	G-rich strand telomeric DNA binding	molecular_function	0.048344	0.216375		GO:0051900	regulation of mitochondrial depolarization	biological_process	0.0300454	0.131325
GO:0031624	ubiquitin conjugating enzyme binding	molecular_function	0.0484422	0.216375		GO:0071459	protein localization to chromosome, centromeric region	biological_process	0.0300454	0.131325
GO:0001836	release of cytochrome c from mitochondria	biological_process	0.0365817	0.217769		GO:0072207	metanephric epithelium development	biological_process	0.0300454	0.131325
GO:0002221	pattern recognition receptor signaling pathway	biological_process	0.0367995	0.217769		GO:0090169	regulation of spindle assembly	biological_process	0.0300454	0.131325
GO:0000154	rRNA modification	biological_process	0.0368	0.217769		GO:1905521	regulation of macrophage migration	biological_process	0.0300454	0.131325
GO:0019068	virion assembly	biological_process	0.0368	0.217769		GO:0060349	bone morphogenesis	biological_process	0.0302846	0.132262
GO:0006297	nucleotide-excision repair, DNA gap filling	biological_process	0.0368805	0.217769		GO:0015293	symporter activity	molecular_function	0.0183907	0.133028
GO:0009081	branched-chain amino acid metabolic process	biological_process	0.0368805	0.217769		GO:0015296	anion:cation symporter activity	molecular_function	0.0185229	0.133028
GO:0010390	histone monoubiquitination	biological_process	0.0368805	0.217769		GO:0043280	positive regulation of cysteine-type endopeptidase activity involved in apoptotic process	biological_process	0.0305848	0.133117
GO:0045736	negative regulation of cyclin-dependent protein serine/threonine kinase activity	biological_process	0.0368805	0.217769		GO:0051893	regulation of focal adhesion assembly	biological_process	0.0305917	0.133117
GO:0045948	positive regulation of translational initiation	biological_process	0.0368805	0.217769		GO:0060193	positive regulation of lipase activity	biological_process	0.0305917	0.133117
GO:0046466	membrane lipid catabolic process	biological_process	0.0368805	0.217769		GO:0090109	regulation of cell-substrate junction assembly	biological_process	0.0305917	0.133117
GO:1902751	positive regulation of cell cycle G2/M phase transition	biological_process	0.0368805	0.217769		GO:0090092	regulation of transmembrane receptor protein serine/threonine kinase signaling pathway	biological_process	0.0306056	0.133117
GO:0018024	histone-lysine N-methyltransferase activity	molecular_function	0.0490185	0.218041		GO:0048247	lymphocyte chemotaxis	biological_process	0.0306627	0.133256
GO:0006090	pyruvate metabolic process	biological_process	0.0371028	0.2185		GO:0060348	bone development	biological_process	0.0307048	0.133305
GO:0010770	positive regulation of cell morphogenesis involved in differentiation	biological_process	0.0371028	0.2185		GO:0001501	skeletal system development	biological_process	0.0307241	0.133305
GO:0032956	regulation of actin cytoskeleton organization	biological_process	0.0371181	0.2185		GO:0006493	protein O-linked glycosylation	biological_process	0.0308849	0.133566
GO:0071010	prespliceosome	cellular_component	0.0703564	0.219437		GO:0008543	fibroblast growth factor receptor signaling pathway	biological_process	0.0308849	0.133566
GO:0070069	cytochrome complex	cellular_component	0.0705446	0.219437		GO:1903317	regulation of protein maturation	biological_process	0.0308849	0.133566
GO:0051536	iron-sulfur cluster binding	molecular_function	0.0499131	0.21949		GO:2000278	regulation of DNA biosynthetic process	biological_process	0.0308849	0.133566
GO:0051540	metal cluster binding	molecular_function	0.0499131	0.21949		GO:0051439	regulation of ubiquitin-protein ligase activity involved in mitotic cell cycle	biological_process	0.0309353	0.133676
GO:0032452	histone demethylase activity	molecular_function	0.0499586	0.21949		GO:0001885	endothelial cell development	biological_process	0.0312434	0.133984
GO:0008652	cellular amino acid biosynthetic process	biological_process	0.0373922	0.219637		GO:0006027	glycosaminoglycan catabolic process	biological_process	0.0312434	0.133984
GO:1902905	positive regulation of supramolecular fiber organization	biological_process	0.0373933	0.219637		GO:0032272	negative regulation of protein polymerization	biological_process	0.0312434	0.133984
GO:0070585	protein localization to mitochondrion	biological_process	0.0374256	0.219637		GO:0032465	regulation of cytokinesis	biological_process	0.0312434	0.133984
GO:0004708	MAP kinase kinase activity	molecular_function	0.0510303	0.220583		GO:1902110	positive regulation of mitochondrial membrane permeability involved in apoptotic process	biological_process	0.0312434	0.133984
GO:0005123	death receptor binding	molecular_function	0.0510303	0.220583		GO:1902686	mitochondrial outer membrane permeabilization involved in programmed cell death	biological_process	0.0312434	0.133984
GO:0016307	phosphatidylinositol phosphate kinase activity	molecular_function	0.0510303	0.220583		GO:1905954	positive regulation of lipid localization	biological_process	0.0312975	0.133984
GO:0017049	GTP-Rho binding	molecular_function	0.0510303	0.220583		GO:0002686	negative regulation of leukocyte migration	biological_process	0.031309	0.133984
GO:0006007	glucose catabolic process	biological_process	0.0378874	0.221445		GO:0010863	positive regulation of phospholipase C activity	biological_process	0.031309	0.133984
GO:0030224	monocyte differentiation	biological_process	0.0378874	0.221445		GO:0046688	response to copper ion	biological_process	0.031309	0.133984
GO:0090004	positive regulation of establishment of protein localization to plasma membrane	biological_process	0.0378874	0.221445		GO:0090075	relaxation of muscle	biological_process	0.031309	0.133984
GO:1903131	mononuclear cell differentiation	biological_process	0.0378874	0.221445		GO:1902230	negative regulation of intrinsic apoptotic signaling pathway in response to DNA damage	biological_process	0.031309	0.133984
GO:0043966	histone H3 acetylation	biological_process	0.0387122	0.223619		GO:0002793	positive regulation of peptide secretion	biological_process	0.0316268	0.135235
GO:1903363	negative regulation of cellular protein catabolic process	biological_process	0.0387122	0.223619		GO:1990778	protein localization to cell periphery	biological_process	0.0320465	0.136736
GO:1902652	secondary alcohol metabolic process	biological_process	0.0387545	0.223619		GO:0030641	regulation of cellular pH	biological_process	0.032055	0.136736
GO:0015868	purine ribonucleotide transport	biological_process	0.0387638	0.223619		GO:2001243	negative regulation of intrinsic apoptotic signaling pathway	biological_process	0.032055	0.136736
GO:0016074	snoRNA metabolic process	biological_process	0.0387638	0.223619		GO:0045137	development of primary sexual characteristics	biological_process	0.0323964	0.137413
GO:0019377	glycolipid catabolic process	biological_process	0.0387638	0.223619		GO:0010042	response to manganese ion	biological_process	0.0324206	0.137413
GO:0033169	histone H3-K9 demethylation	biological_process	0.0387638	0.223619		GO:0010934	macrophage cytokine production	biological_process	0.0324206	0.137413
GO:0034111	negative regulation of homotypic cell-cell adhesion	biological_process	0.0387638	0.223619		GO:0010984	regulation of lipoprotein particle clearance	biological_process	0.0324206	0.137413
GO:0051503	adenine nucleotide transport	biological_process	0.0387638	0.223619		GO:0034134	toll-like receptor 2 signaling pathway	biological_process	0.0324206	0.137413
GO:0070243	regulation of thymocyte apoptotic process	biological_process	0.0387638	0.223619		GO:0061050	regulation of cell growth involved in cardiac muscle cell development	biological_process	0.0324206	0.137413
GO:0090178	regulation of establishment of planar polarity involved in neural tube closure	biological_process	0.0387638	0.223619		GO:1901673	regulation of mitotic spindle assembly	biological_process	0.0324206	0.137413
GO:0097201	negative regulation of transcription from RNA polymerase II promoter in response to stress	biological_process	0.0387638	0.223619		GO:1905523	positive regulation of macrophage migration	biological_process	0.0324206	0.137413
GO:1902166	negative regulation of intrinsic apoptotic signaling pathway in response to DNA damage by p53 class mediator	biological_process	0.0387638	0.223619		GO:0050890	cognition	biological_process	0.0325031	0.137653
GO:0055072	iron ion homeostasis	biological_process	0.038814	0.223685		GO:0071241	cellular response to inorganic substance	biological_process	0.0325822	0.137878
GO:0007178	transmembrane receptor protein serine/threonine kinase signaling pathway	biological_process	0.0388979	0.223944		GO:0001838	embryonic epithelial tube formation	biological_process	0.0329197	0.139085
GO:0033158	regulation of protein import into nucleus, translocation	biological_process	0.0392343	0.224982		GO:0051238	sequestering of metal ion	biological_process	0.0329197	0.139085
GO:0034035	purine ribonucleoside bisphosphate metabolic process	biological_process	0.0392343	0.224982		GO:0019058	viral life cycle	biological_process	0.033025	0.139419
GO:0050427	3'-phosphoadenosine 5'-phosphosulfate metabolic process	biological_process	0.0392343	0.224982		GO:0032653	regulation of interleukin-10 production	biological_process	0.0331659	0.139902
GO:0071498	cellular response to fluid shear stress	biological_process	0.0392343	0.224982		GO:0051169	nuclear transport	biological_process	0.0333412	0.14053
GO:0045335	phagocytic vesicle	cellular_component	0.0733726	0.227229		GO:0031258	lamellipodium membrane	cellular_component	0.0218984	0.141169
GO:0010720	positive regulation of cell development	biological_process	0.0399768	0.228542		GO:0000307	cyclin-dependent protein kinase holoenzyme complex	cellular_component	0.0219874	0.141169
GO:0006818	hydrogen transport	biological_process	0.0400244	0.228542		GO:0000779	condensed chromosome, centromeric region	cellular_component	0.0226305	0.141535
GO:0032781	positive regulation of ATPase activity	biological_process	0.0400366	0.228542		GO:0005767	secondary lysosome	cellular_component	0.0227959	0.141535
GO:1903051	negative regulation of proteolysis involved in cellular protein catabolic process	biological_process	0.0400366	0.228542		GO:0031616	spindle pole centrosome	cellular_component	0.0227959	0.141535
GO:0016574	histone ubiquitination	biological_process	0.0401326	0.228542		GO:0022600	digestive system process	biological_process	0.0339859	0.143021
GO:0033683	nucleotide-excision repair, DNA incision	biological_process	0.0401326	0.228542		GO:0043331	response to dsRNA	biological_process	0.0339859	0.143021
GO:0060976	coronary vasculature development	biological_process	0.0401326	0.228542		GO:1904018	positive regulation of vasculature development	biological_process	0.0340666	0.143247
GO:0007044	cell-substrate junction assembly	biological_process	0.0402192	0.228809		GO:0002011	morphogenesis of an epithelial sheet	biological_process	0.0344092	0.144306
GO:0046365	monosaccharide catabolic process	biological_process	0.040814	0.231555		GO:0010171	body morphogenesis	biological_process	0.0344092	0.144306
GO:1900076	regulation of cellular response to insulin stimulus	biological_process	0.040814	0.231555		GO:0045740	positive regulation of DNA replication	biological_process	0.0344092	0.144306
GO:0071560	cellular response to transforming growth factor beta stimulus	biological_process	0.0408225	0.231555		GO:0001935	endothelial cell proliferation	biological_process	0.0345538	0.144306
GO:0005096	GTPase activator activity	molecular_function	0.0538778	0.231956		GO:0006165	nucleoside diphosphate phosphorylation	biological_process	0.0345538	0.144306
GO:0001227	transcriptional repressor activity, RNA polymerase II transcription regulatory region sequence-specific binding	molecular_function	0.0542804	0.232754		GO:1905952	regulation of lipid localization	biological_process	0.0345538	0.144306
GO:0030863	cortical cytoskeleton	cellular_component	0.0768131	0.23684		GO:1902806	regulation of cell cycle G1/S phase transition	biological_process	0.0345646	0.144306
GO:0071383	cellular response to steroid hormone stimulus	biological_process	0.041799	0.236861		GO:0006936	muscle contraction	biological_process	0.0345848	0.144306
GO:0006733	oxidoreduction coenzyme metabolic process	biological_process	0.0419586	0.237454		GO:0001707	mesoderm formation	biological_process	0.0345901	0.144306
GO:0003230	cardiac atrium development	biological_process	0.0421509	0.237454		GO:0043502	regulation of muscle adaptation	biological_process	0.0345901	0.144306
GO:0031062	positive regulation of histone methylation	biological_process	0.0421509	0.237454		GO:0002478	antigen processing and presentation of exogenous peptide antigen	biological_process	0.0346268	0.144346
GO:0043276	anoikis	biological_process	0.0421509	0.237454		GO:0005109	frizzled binding	molecular_function	0.0202787	0.144543
GO:0070911	global genome nucleotide-excision repair	biological_process	0.0421509	0.237454		GO:0072676	lymphocyte migration	biological_process	0.0347933	0.144887
GO:2000279	negative regulation of DNA biosynthetic process	biological_process	0.0421509	0.237454		GO:0006096	glycolytic process	biological_process	0.0348382	0.144887
GO:0070491	repressing transcription factor binding	molecular_function	0.0556084	0.237499		GO:0070555	response to interleukin-1	biological_process	0.0348382	0.144887
GO:0099738	cell cortex region	cellular_component	0.0776197	0.238282		GO:0051961	negative regulation of nervous system development	biological_process	0.0353305	0.146415
GO:0017134	fibroblast growth factor binding	molecular_function	0.0560648	0.238498		GO:0031346	positive regulation of cell projection organization	biological_process	0.0353445	0.146415
GO:0022616	DNA strand elongation	biological_process	0.0425225	0.239314		GO:0006911	phagocytosis, engulfment	biological_process	0.0354261	0.146415
GO:0050852	T cell receptor signaling pathway	biological_process	0.0426746	0.239935		GO:0017145	stem cell division	biological_process	0.0354261	0.146415
GO:0051101	regulation of DNA binding	biological_process	0.0427843	0.240318		GO:0031952	regulation of protein autophosphorylation	biological_process	0.0354261	0.146415
GO:0042255	ribosome assembly	biological_process	0.0428849	0.240648		GO:0032964	collagen biosynthetic process	biological_process	0.0354261	0.146415
GO:0000045	autophagosome assembly	biological_process	0.0429775	0.240933		GO:0045123	cellular extravasation	biological_process	0.0354261	0.146415
GO:0048015	phosphatidylinositol-mediated signaling	biological_process	0.0430483	0.241095		GO:1903670	regulation of sprouting angiogenesis	biological_process	0.0354261	0.146415
GO:0021695	cerebellar cortex development	biological_process	0.0434069	0.242632		GO:0050730	regulation of peptidyl-tyrosine phosphorylation	biological_process	0.0355198	0.146688
GO:0051496	positive regulation of stress fiber assembly	biological_process	0.0434069	0.242632		GO:0044708	single-organism behavior	biological_process	0.0356288	0.147024
GO:0007492	endoderm development	biological_process	0.0435635	0.242801		GO:0030111	regulation of Wnt signaling pathway	biological_process	0.0361125	0.148632
GO:0009142	nucleoside triphosphate biosynthetic process	biological_process	0.0435635	0.242801		GO:0061326	renal tubule development	biological_process	0.0361211	0.148632
GO:2000106	regulation of leukocyte apoptotic process	biological_process	0.0435635	0.242801		GO:1901343	negative regulation of vasculature development	biological_process	0.0361211	0.148632
GO:0000781	chromosome, telomeric region	cellular_component	0.0804987	0.244756		GO:0001841	neural tube formation	biological_process	0.0361877	0.148632
GO:0030014	CCR4-NOT complex	cellular_component	0.0817493	0.244756		GO:0051101	regulation of DNA binding	biological_process	0.0361877	0.148632
GO:0031527	filopodium membrane	cellular_component	0.0817493	0.244756		GO:0051443	positive regulation of ubiquitin-protein transferase activity	biological_process	0.0361877	0.148632
GO:0033178	proton-transporting two-sector ATPase complex, catalytic domain	cellular_component	0.0817493	0.244756		GO:0043583	ear development	biological_process	0.0362142	0.148632
GO:0034045	pre-autophagosomal structure membrane	cellular_component	0.0817493	0.244756		GO:0003018	vascular process in circulatory system	biological_process	0.0364027	0.149065
GO:0031985	Golgi cisterna	cellular_component	0.0821352	0.244756		GO:0048754	branching morphogenesis of an epithelial tube	biological_process	0.0364027	0.149065
GO:0030136	clathrin-coated vesicle	cellular_component	0.0824145	0.244756		GO:0048738	cardiac muscle tissue development	biological_process	0.0364744	0.149065
GO:0005876	spindle microtubule	cellular_component	0.0825138	0.244756		GO:0003416	endochondral bone growth	biological_process	0.0365722	0.149065
GO:1903533	regulation of protein targeting	biological_process	0.0440926	0.245513		GO:0042744	hydrogen peroxide catabolic process	biological_process	0.0365722	0.149065
GO:0071887	leukocyte apoptotic process	biological_process	0.0443298	0.246595		GO:0046466	membrane lipid catabolic process	biological_process	0.0365722	0.149065
GO:0042180	cellular ketone metabolic process	biological_process	0.0444569	0.247064		GO:0050687	negative regulation of defense response to virus	biological_process	0.0365722	0.149065
GO:0030687	preribosome, large subunit precursor	cellular_component	0.0843268	0.247397		GO:1902895	positive regulation of pri-miRNA transcription from RNA polymerase II promoter	biological_process	0.0365722	0.149065
GO:0070461	SAGA-type complex	cellular_component	0.0843268	0.247397		GO:2000482	regulation of interleukin-8 secretion	biological_process	0.0365722	0.149065
GO:0000776	kinetochore	cellular_component	0.0854136	0.247397		GO:0098552	side of membrane	cellular_component	0.0243126	0.149311
GO:0044215	other organism	cellular_component	0.0855155	0.247397		GO:0006913	nucleocytoplasmic transport	biological_process	0.0367257	0.149576
GO:0044216	other organism cell	cellular_component	0.0855155	0.247397		GO:0007019	microtubule depolymerization	biological_process	0.0368857	0.149769
GO:0044217	other organism part	cellular_component	0.0855155	0.247397		GO:0016486	peptide hormone processing	biological_process	0.0368857	0.149769
GO:0071902	positive regulation of protein serine/threonine kinase activity	biological_process	0.0449915	0.249153		GO:0043552	positive regulation of phosphatidylinositol 3-kinase activity	biological_process	0.0368857	0.149769
GO:0006406	mRNA export from nucleus	biological_process	0.0450058	0.249153		GO:1902175	regulation of oxidative stress-induced intrinsic apoptotic signaling pathway	biological_process	0.0368857	0.149769
GO:0010634	positive regulation of epithelial cell migration	biological_process	0.0450058	0.249153		GO:0033157	regulation of intracellular protein transport	biological_process	0.0370541	0.150338
GO:0071427	mRNA-containing ribonucleoprotein complex export from nucleus	biological_process	0.0450058	0.249153		GO:0046824	positive regulation of nucleocytoplasmic transport	biological_process	0.037218	0.150652
GO:0001706	endoderm formation	biological_process	0.0451769	0.249621		GO:0016525	negative regulation of angiogenesis	biological_process	0.0372449	0.150652
GO:0018208	peptidyl-proline modification	biological_process	0.0451769	0.249621		GO:0051437	positive regulation of ubiquitin-protein ligase activity involved in regulation of mitotic cell cycle transition	biological_process	0.0372449	0.150652
GO:0008757	S-adenosylmethionine-dependent methyltransferase activity	molecular_function	0.0590311	0.250124		GO:0097581	lamellipodium organization	biological_process	0.0372449	0.150652
GO:0006354	DNA-templated transcription, elongation	biological_process	0.0455028	0.250619		GO:0000060	protein import into nucleus, translocation	biological_process	0.0376207	0.151825
GO:0070302	regulation of stress-activated protein kinase signaling cascade	biological_process	0.0456827	0.250619		GO:0008631	intrinsic apoptotic signaling pathway in response to oxidative stress	biological_process	0.0376207	0.151825
GO:0060491	regulation of cell projection assembly	biological_process	0.0457839	0.250619		GO:0051220	cytoplasmic sequestering of protein	biological_process	0.0376207	0.151825
GO:0030111	regulation of Wnt signaling pathway	biological_process	0.0461553	0.250619		GO:0006757	ATP generation from ADP	biological_process	0.0377915	0.152168
GO:0045927	positive regulation of growth	biological_process	0.0461769	0.250619		GO:0017015	regulation of transforming growth factor beta receptor signaling pathway	biological_process	0.0377915	0.152168
GO:0008156	negative regulation of DNA replication	biological_process	0.0463215	0.250619		GO:1904666	regulation of ubiquitin protein ligase activity	biological_process	0.0377915	0.152168
GO:0010165	response to X-ray	biological_process	0.0463215	0.250619		GO:0030426	growth cone	cellular_component	0.0252104	0.15316
GO:0030879	mammary gland development	biological_process	0.0463983	0.250619		GO:0007422	peripheral nervous system development	biological_process	0.0381193	0.153372
GO:0031330	negative regulation of cellular catabolic process	biological_process	0.0465236	0.250619		GO:0002066	columnar/cuboidal epithelial cell development	biological_process	0.0385421	0.154546
GO:0008631	intrinsic apoptotic signaling pathway in response to oxidative stress	biological_process	0.046616	0.250619		GO:0045670	regulation of osteoclast differentiation	biological_process	0.0385421	0.154546
GO:0043244	regulation of protein complex disassembly	biological_process	0.0468255	0.250619		GO:0003333	amino acid transmembrane transport	biological_process	0.0386147	0.154546
GO:0009083	branched-chain amino acid catabolic process	biological_process	0.0468303	0.250619		GO:0032611	interleukin-1 beta production	biological_process	0.0386147	0.154546
GO:0033962	cytoplasmic mRNA processing body assembly	biological_process	0.0468303	0.250619		GO:0032652	regulation of interleukin-1 production	biological_process	0.0386147	0.154546
GO:0036314	response to sterol	biological_process	0.0468303	0.250619		GO:0035794	positive regulation of mitochondrial membrane permeability	biological_process	0.0386147	0.154546
GO:0048710	regulation of astrocyte differentiation	biological_process	0.0468303	0.250619		GO:0048857	neural nucleus development	biological_process	0.0386147	0.154546
GO:0051497	negative regulation of stress fiber assembly	biological_process	0.0468303	0.250619		GO:0015297	antiporter activity	molecular_function	0.0220339	0.154727
GO:0060544	regulation of necroptotic process	biological_process	0.0468303	0.250619		GO:0050660	flavin adenine dinucleotide binding	molecular_function	0.0220339	0.154727
GO:1903599	positive regulation of mitophagy	biological_process	0.0468303	0.250619		GO:0051216	cartilage development	biological_process	0.0390009	0.155974
GO:0046209	nitric oxide metabolic process	biological_process	0.0469283	0.250619		GO:0043200	response to amino acid	biological_process	0.0390726	0.156144
GO:0014020	primary neural tube formation	biological_process	0.0469795	0.250619		GO:0001725	stress fiber	cellular_component	0.0263053	0.156447
GO:0006307	DNA dealkylation involved in DNA repair	biological_process	0.047184	0.250619		GO:0097517	contractile actin filament bundle	cellular_component	0.0263053	0.156447
GO:0007084	mitotic nuclear envelope reassembly	biological_process	0.047184	0.250619		GO:0032368	regulation of lipid transport	biological_process	0.039322	0.156994
GO:0010452	histone H3-K36 methylation	biological_process	0.047184	0.250619		GO:1903037	regulation of leukocyte cell-cell adhesion	biological_process	0.0393445	0.156994
GO:0010457	centriole-centriole cohesion	biological_process	0.047184	0.250619		GO:0071383	cellular response to steroid hormone stimulus	biological_process	0.039546	0.15768
GO:0032070	regulation of deoxyribonuclease activity	biological_process	0.047184	0.250619		GO:0036019	endolysosome	cellular_component	0.0271256	0.159646
GO:0034427	nuclear-transcribed mRNA catabolic process, exonucleolytic, 3'-5'	biological_process	0.047184	0.250619		GO:0001974	blood vessel remodeling	biological_process	0.040654	0.161145
GO:0034969	histone arginine methylation	biological_process	0.047184	0.250619		GO:0006739	NADP metabolic process	biological_process	0.040654	0.161145
GO:0042532	negative regulation of tyrosine phosphorylation of STAT protein	biological_process	0.047184	0.250619		GO:0031572	G2 DNA damage checkpoint	biological_process	0.040654	0.161145
GO:0046185	aldehyde catabolic process	biological_process	0.047184	0.250619		GO:0032732	positive regulation of interleukin-1 production	biological_process	0.040654	0.161145
GO:0048845	venous blood vessel morphogenesis	biological_process	0.047184	0.250619		GO:0001764	neuron migration	biological_process	0.0407103	0.161145
GO:0060340	positive regulation of type I interferon-mediated signaling pathway	biological_process	0.047184	0.250619		GO:0006865	amino acid transport	biological_process	0.0407103	0.161145
GO:0060439	trachea morphogenesis	biological_process	0.047184	0.250619		GO:1900182	positive regulation of protein localization to nucleus	biological_process	0.0407103	0.161145
GO:0070203	regulation of establishment of protein localization to telomere	biological_process	0.047184	0.250619		GO:0030316	osteoclast differentiation	biological_process	0.0407182	0.161145
GO:0072015	glomerular visceral epithelial cell development	biological_process	0.047184	0.250619		GO:0045621	positive regulation of lymphocyte differentiation	biological_process	0.0407182	0.161145
GO:0098792	xenophagy	biological_process	0.047184	0.250619		GO:0060419	heart growth	biological_process	0.0407182	0.161145
GO:1900112	regulation of histone H3-K9 trimethylation	biological_process	0.047184	0.250619		GO:0002062	chondrocyte differentiation	biological_process	0.0409194	0.161155
GO:1901407	regulation of phosphorylation of RNA polymerase II C-terminal domain	biological_process	0.047184	0.250619		GO:0038111	interleukin-7-mediated signaling pathway	biological_process	0.0409194	0.161155
GO:1903960	negative regulation of anion transmembrane transport	biological_process	0.047184	0.250619		GO:0051153	regulation of striated muscle cell differentiation	biological_process	0.0409194	0.161155
GO:1990173	protein localization to nucleoplasm	biological_process	0.047184	0.250619		GO:0046942	carboxylic acid transport	biological_process	0.0410062	0.161155
GO:1990440	positive regulation of transcription from RNA polymerase II promoter in response to endoplasmic reticulum stress	biological_process	0.047184	0.250619		GO:0010715	regulation of extracellular matrix disassembly	biological_process	0.0411149	0.161155
GO:2000188	regulation of cholesterol homeostasis	biological_process	0.047184	0.250619		GO:0019321	pentose metabolic process	biological_process	0.0411149	0.161155
GO:2000786	positive regulation of autophagosome assembly	biological_process	0.047184	0.250619		GO:0031000	response to caffeine	biological_process	0.0411149	0.161155
GO:0030490	maturation of SSU-rRNA	biological_process	0.0476775	0.253007		GO:0031998	regulation of fatty acid beta-oxidation	biological_process	0.0411149	0.161155
GO:0016363	nuclear matrix	cellular_component	0.0878777	0.253189		GO:0039535	regulation of RIG-I signaling pathway	biological_process	0.0411149	0.161155
GO:0006760	folic acid-containing compound metabolic process	biological_process	0.0480172	0.254575		GO:0046885	regulation of hormone biosynthetic process	biological_process	0.0411149	0.161155
GO:0046364	monosaccharide biosynthetic process	biological_process	0.0484191	0.256234		GO:0051782	negative regulation of cell division	biological_process	0.0411149	0.161155
GO:1903901	negative regulation of viral life cycle	biological_process	0.0484191	0.256234		GO:0070293	renal absorption	biological_process	0.0411149	0.161155
GO:0030140	trans-Golgi network transport vesicle	cellular_component	0.090522	0.256867		GO:0070977	bone maturation	biological_process	0.0411149	0.161155
GO:0030132	clathrin coat of coated pit	cellular_component	0.0919356	0.256867		GO:0019884	antigen processing and presentation of exogenous antigen	biological_process	0.0413347	0.161897
GO:0035267	NuA4 histone acetyltransferase complex	cellular_component	0.0919356	0.256867		GO:0015992	proton transport	biological_process	0.0415237	0.162517
GO:0043189	H4/H2A histone acetyltransferase complex	cellular_component	0.0919356	0.256867		GO:0002697	regulation of immune effector process	biological_process	0.0417583	0.163315
GO:0019774	proteasome core complex, beta-subunit complex	cellular_component	0.092443	0.256867		GO:0001570	vasculogenesis	biological_process	0.041892	0.163477
GO:0030688	preribosome, small subunit precursor	cellular_component	0.092443	0.256867		GO:0009064	glutamine family amino acid metabolic process	biological_process	0.041892	0.163477
GO:0031332	RNAi effector complex	cellular_component	0.092443	0.256867		GO:0048332	mesoderm morphogenesis	biological_process	0.041892	0.163477
GO:0070971	endoplasmic reticulum exit site	cellular_component	0.092443	0.256867		GO:0070302	regulation of stress-activated protein kinase signaling cascade	biological_process	0.0420309	0.163899
GO:0101031	chaperone complex	cellular_component	0.092443	0.256867		GO:0006024	glycosaminoglycan biosynthetic process	biological_process	0.0421187	0.164001
GO:0008376	acetylgalactosaminyltransferase activity	molecular_function	0.0609065	0.257054		GO:1902600	hydrogen ion transmembrane transport	biological_process	0.0421187	0.164001
GO:0021543	pallium development	biological_process	0.0486934	0.25745		GO:0045839	negative regulation of mitotic nuclear division	biological_process	0.0424596	0.164485
GO:0035050	embryonic heart tube development	biological_process	0.0488987	0.257728		GO:0046580	negative regulation of Ras protein signal transduction	biological_process	0.0424596	0.164485
GO:0051640	organelle localization	biological_process	0.0492167	0.257728		GO:0048641	regulation of skeletal muscle tissue development	biological_process	0.0424596	0.164485
GO:0016051	carbohydrate biosynthetic process	biological_process	0.0494292	0.257728		GO:0051055	negative regulation of lipid biosynthetic process	biological_process	0.0424596	0.164485
GO:0000478	endonucleolytic cleavage involved in rRNA processing	biological_process	0.0495509	0.257728		GO:0099024	plasma membrane invagination	biological_process	0.0424596	0.164485
GO:0007076	mitotic chromosome condensation	biological_process	0.0495509	0.257728		GO:2000649	regulation of sodium ion transmembrane transporter activity	biological_process	0.0424596	0.164485
GO:0018027	peptidyl-lysine dimethylation	biological_process	0.0495509	0.257728		GO:2001239	regulation of extrinsic apoptotic signaling pathway in absence of ligand	biological_process	0.0424596	0.164485
GO:0034656	nucleobase-containing small molecule catabolic process	biological_process	0.0495509	0.257728		GO:0042887	amide transmembrane transporter activity	molecular_function	0.0238196	0.165034
GO:0035493	SNARE complex assembly	biological_process	0.0495509	0.257728		GO:0005520	insulin-like growth factor binding	molecular_function	0.024024	0.165034
GO:0042790	transcription of nuclear large rRNA transcript from RNA polymerase I promoter	biological_process	0.0495509	0.257728		GO:0008574	ATP-dependent microtubule motor activity, plus-end-directed	molecular_function	0.024024	0.165034
GO:0046599	regulation of centriole replication	biological_process	0.0495509	0.257728		GO:0006879	cellular iron ion homeostasis	biological_process	0.0427156	0.165126
GO:0046885	regulation of hormone biosynthetic process	biological_process	0.0495509	0.257728		GO:1905710	positive regulation of membrane permeability	biological_process	0.0427156	0.165126
GO:0048308	organelle inheritance	biological_process	0.0495509	0.257728		GO:0098773	skin epidermis development	biological_process	0.0427184	0.165126
GO:0051044	positive regulation of membrane protein ectodomain proteolysis	biological_process	0.0495509	0.257728		GO:0006869	lipid transport	biological_process	0.042888	0.165481
GO:0061323	cell proliferation involved in heart morphogenesis	biological_process	0.0495509	0.257728		GO:0048645	animal organ formation	biological_process	0.0429999	0.165481
GO:0071025	RNA surveillance	biological_process	0.0495509	0.257728		GO:1903391	regulation of adherens junction organization	biological_process	0.0429999	0.165481
GO:0097067	cellular response to thyroid hormone stimulus	biological_process	0.0495509	0.257728		GO:0045665	negative regulation of neuron differentiation	biological_process	0.0430321	0.165481
GO:1902165	regulation of intrinsic apoptotic signaling pathway in response to DNA damage by p53 class mediator	biological_process	0.0495509	0.257728		GO:0033014	tetrapyrrole biosynthetic process	biological_process	0.0430592	0.165481
GO:2000811	negative regulation of anoikis	biological_process	0.0495509	0.257728		GO:0043516	regulation of DNA damage response, signal transduction by p53 class mediator	biological_process	0.0430592	0.165481
GO:0008157	protein phosphatase 1 binding	molecular_function	0.0615886	0.257902		GO:0046685	response to arsenic-containing substance	biological_process	0.0430592	0.165481
GO:0070300	phosphatidic acid binding	molecular_function	0.0615886	0.257902		GO:1900274	regulation of phospholipase C activity	biological_process	0.0430592	0.165481
GO:0016763	transferase activity, transferring pentosyl groups	molecular_function	0.0618697	0.258071		GO:0048839	inner ear development	biological_process	0.0437694	0.167515
GO:0046580	negative regulation of Ras protein signal transduction	biological_process	0.0497549	0.25809		GO:0006783	heme biosynthetic process	biological_process	0.0439036	0.167515
GO:0090003	regulation of establishment of protein localization to plasma membrane	biological_process	0.0497549	0.25809		GO:0016338	calcium-independent cell-cell adhesion via plasma membrane cell-adhesion molecules	biological_process	0.0439036	0.167515
GO:0090329	regulation of DNA-dependent DNA replication	biological_process	0.0497549	0.25809		GO:0042755	eating behavior	biological_process	0.0439036	0.167515
GO:0010803	regulation of tumor necrosis factor-mediated signaling pathway	biological_process	0.0501289	0.259563		GO:0045939	negative regulation of steroid metabolic process	biological_process	0.0439036	0.167515
GO:0046889	positive regulation of lipid biosynthetic process	biological_process	0.0501289	0.259563		GO:0061037	negative regulation of cartilage development	biological_process	0.0439036	0.167515
GO:0031670	cellular response to nutrient	biological_process	0.050387	0.260664		GO:0098868	bone growth	biological_process	0.0439036	0.167515
GO:1990782	protein tyrosine kinase binding	molecular_function	0.0629917	0.261001		GO:1903203	regulation of oxidative stress-induced neuron death	biological_process	0.0439036	0.167515
GO:0003950	NAD+ ADP-ribosyltransferase activity	molecular_function	0.0633346	0.261001		GO:1905208	negative regulation of cardiocyte differentiation	biological_process	0.0439036	0.167515
GO:0002161	aminoacyl-tRNA editing activity	molecular_function	0.0642762	0.261001		GO:1905209	positive regulation of cardiocyte differentiation	biological_process	0.0439036	0.167515
GO:0004861	cyclin-dependent protein serine/threonine kinase inhibitor activity	molecular_function	0.0642762	0.261001		GO:0007062	sister chromatid cohesion	biological_process	0.0439441	0.167549
GO:0015216	purine nucleotide transmembrane transporter activity	molecular_function	0.0642762	0.261001		GO:0003205	cardiac chamber development	biological_process	0.044116	0.167783
GO:0017017	MAP kinase tyrosine/serine/threonine phosphatase activity	molecular_function	0.0642762	0.261001		GO:2000045	regulation of G1/S transition of mitotic cell cycle	biological_process	0.044116	0.167783
GO:0032454	histone demethylase activity (H3-K9 specific)	molecular_function	0.0642762	0.261001		GO:0030203	glycosaminoglycan metabolic process	biological_process	0.0441275	0.167783
GO:0048017	inositol lipid-mediated signaling	biological_process	0.0505749	0.261402		GO:0030148	sphingolipid biosynthetic process	biological_process	0.0442266	0.167783
GO:0000978	RNA polymerase II core promoter proximal region sequence-specific DNA binding	molecular_function	0.0647209	0.261814		GO:0098760	response to interleukin-7	biological_process	0.0442266	0.167783
GO:0042273	ribosomal large subunit biogenesis	biological_process	0.0508339	0.26227		GO:0098761	cellular response to interleukin-7	biological_process	0.0442266	0.167783
GO:0046902	regulation of mitochondrial membrane permeability	biological_process	0.0508339	0.26227		GO:1903844	regulation of cellular response to transforming growth factor beta stimulus	biological_process	0.0442266	0.167783
GO:0009185	ribonucleoside diphosphate metabolic process	biological_process	0.0513347	0.264617		GO:0032411	positive regulation of transporter activity	biological_process	0.0444116	0.168125
GO:0044665	MLL1/2 complex	cellular_component	0.0962495	0.265347		GO:1901888	regulation of cell junction assembly	biological_process	0.0444116	0.168125
GO:0071339	MLL1 complex	cellular_component	0.0962495	0.265347		GO:2000181	negative regulation of blood vessel morphogenesis	biological_process	0.0444116	0.168125
GO:0060411	cardiac septum morphogenesis	biological_process	0.0525301	0.269146		GO:0005774	vacuolar membrane	cellular_component	0.0291615	0.169409
GO:0042274	ribosomal small subunit biogenesis	biological_process	0.0527336	0.269146		GO:0016469	proton-transporting two-sector ATPase complex	cellular_component	0.029649	0.169409
GO:0044766	multi-organism transport	biological_process	0.0527336	0.269146		GO:0036020	endolysosome membrane	cellular_component	0.0297282	0.169409
GO:0051304	chromosome separation	biological_process	0.0527336	0.269146		GO:0005913	cell-cell adherens junction	cellular_component	0.0299839	0.169409
GO:0071260	cellular response to mechanical stimulus	biological_process	0.0527336	0.269146		GO:0015849	organic acid transport	biological_process	0.0447983	0.169468
GO:1902579	multi-organism localization	biological_process	0.0527336	0.269146		GO:0042626	ATPase activity, coupled to transmembrane movement of substances	molecular_function	0.0250583	0.170901
GO:0016358	dendrite development	biological_process	0.0527927	0.269146		GO:0006023	aminoglycan biosynthetic process	biological_process	0.0453299	0.171357
GO:0032872	regulation of stress-activated MAPK cascade	biological_process	0.0527927	0.269146		GO:0008406	gonad development	biological_process	0.0453993	0.171498
GO:0046488	phosphatidylinositol metabolic process	biological_process	0.0527927	0.269146		GO:0015399	primary active transmembrane transporter activity	molecular_function	0.0257067	0.172168
GO:0007091	metaphase/anaphase transition of mitotic cell cycle	biological_process	0.0528204	0.269146		GO:0015405	P-P-bond-hydrolysis-driven transmembrane transporter activity	molecular_function	0.0257067	0.172168
GO:0043388	positive regulation of DNA binding	biological_process	0.0528204	0.269146		GO:0004175	endopeptidase activity	molecular_function	0.0257888	0.172168
GO:0044784	metaphase/anaphase transition of cell cycle	biological_process	0.0528204	0.269146		GO:0008307	structural constituent of muscle	molecular_function	0.0260786	0.172273
GO:1904377	positive regulation of protein localization to cell periphery	biological_process	0.0528204	0.269146		GO:0046906	tetrapyrrole binding	molecular_function	0.026168	0.172273
GO:0005057	signal transducer activity, downstream of receptor	molecular_function	0.0674915	0.271996		GO:0030425	dendrite	cellular_component	0.030948	0.173125
GO:0003743	translation initiation factor activity	molecular_function	0.0678298	0.272335		GO:0048762	mesenchymal cell differentiation	biological_process	0.0458909	0.173198
GO:0042063	gliogenesis	biological_process	0.0537184	0.27348		GO:0045454	cell redox homeostasis	biological_process	0.0459147	0.173198
GO:0007064	mitotic sister chromatid cohesion	biological_process	0.054139	0.274409		GO:0003158	endothelium development	biological_process	0.0460993	0.173397
GO:0018126	protein hydroxylation	biological_process	0.054139	0.274409		GO:0043618	regulation of transcription from RNA polymerase II promoter in response to stress	biological_process	0.0460993	0.173397
GO:0043457	regulation of cellular respiration	biological_process	0.054139	0.274409		GO:0003279	cardiac septum development	biological_process	0.0463151	0.173397
GO:1903203	regulation of oxidative stress-induced neuron death	biological_process	0.054139	0.274409		GO:0031109	microtubule polymerization or depolymerization	biological_process	0.0463151	0.173397
GO:2000209	regulation of anoikis	biological_process	0.054139	0.274409		GO:0051453	regulation of intracellular pH	biological_process	0.0463151	0.173397
GO:0031593	polyubiquitin binding	molecular_function	0.0686651	0.27466		GO:0000266	mitochondrial fission	biological_process	0.0463589	0.173397
GO:0042982	amyloid precursor protein metabolic process	biological_process	0.0543398	0.274972		GO:0010596	negative regulation of endothelial cell migration	biological_process	0.0463589	0.173397
GO:0033500	carbohydrate homeostasis	biological_process	0.0543932	0.274972		GO:0030212	hyaluronan metabolic process	biological_process	0.0463589	0.173397
GO:0042593	glucose homeostasis	biological_process	0.0543932	0.274972		GO:0055081	anion homeostasis	biological_process	0.0463589	0.173397
GO:0003231	cardiac ventricle development	biological_process	0.0544802	0.27517		GO:0060043	regulation of cardiac muscle cell proliferation	biological_process	0.0463589	0.173397
GO:0006283	transcription-coupled nucleotide-excision repair	biological_process	0.0545975	0.275521		GO:0060428	lung epithelium development	biological_process	0.0463589	0.173397
GO:0030308	negative regulation of cell growth	biological_process	0.0547705	0.276152		GO:1903727	positive regulation of phospholipid metabolic process	biological_process	0.0463589	0.173397
GO:0019208	phosphatase regulator activity	molecular_function	0.0694596	0.276806		GO:0051258	protein polymerization	biological_process	0.0464092	0.173463
GO:0044262	cellular carbohydrate metabolic process	biological_process	0.0549968	0.277051		GO:0034250	positive regulation of cellular amide metabolic process	biological_process	0.0465925	0.174026
GO:0003887	DNA-directed DNA polymerase activity	molecular_function	0.0702585	0.277672		GO:0021543	pallium development	biological_process	0.0466319	0.174051
GO:0016866	intramolecular transferase activity	molecular_function	0.0702585	0.277672		GO:0006818	hydrogen transport	biological_process	0.0468473	0.174732
GO:0035258	steroid hormone receptor binding	molecular_function	0.0712167	0.277672		GO:0006026	aminoglycan catabolic process	biological_process	0.0471032	0.175248
GO:0000983	transcription factor activity, RNA polymerase II core promoter sequence-specific	molecular_function	0.0714901	0.277672		GO:0032642	regulation of chemokine production	biological_process	0.0471032	0.175248
GO:0003841	1-acylglycerol-3-phosphate O-acyltransferase activity	molecular_function	0.0714901	0.277672		GO:0072583	clathrin-dependent endocytosis	biological_process	0.0471032	0.175248
GO:0015605	organophosphate ester transmembrane transporter activity	molecular_function	0.0714901	0.277672		GO:0010876	lipid localization	biological_process	0.0471175	0.175248
GO:0016780	phosphotransferase activity, for other substituted phosphate groups	molecular_function	0.0714901	0.277672		GO:0045446	endothelial cell differentiation	biological_process	0.0477171	0.17723
GO:0001046	core promoter sequence-specific DNA binding	molecular_function	0.0719004	0.278045		GO:0050728	negative regulation of inflammatory response	biological_process	0.0477171	0.17723
GO:0003727	single-stranded RNA binding	molecular_function	0.0721049	0.278045		GO:0010332	response to gamma radiation	biological_process	0.047791	0.177257
GO:0030117	membrane coat	cellular_component	0.102429	0.280184		GO:0071359	cellular response to dsRNA	biological_process	0.047791	0.177257
GO:0048475	coated membrane	cellular_component	0.102429	0.280184		GO:0005581	collagen trimer	cellular_component	0.0327096	0.177381
GO:0019897	extrinsic component of plasma membrane	cellular_component	0.102935	0.280477		GO:0005605	basal lamina	cellular_component	0.0330828	0.177381
GO:0010965	regulation of mitotic sister chromatid separation	biological_process	0.0558104	0.280659		GO:0032590	dendrite membrane	cellular_component	0.0330828	0.177381
GO:0033260	nuclear DNA replication	biological_process	0.0558104	0.280659		GO:0097431	mitotic spindle pole	cellular_component	0.0330828	0.177381
GO:0042393	histone binding	molecular_function	0.0741171	0.28478		GO:0014704	intercalated disc	cellular_component	0.0332786	0.177381
GO:0021987	cerebral cortex development	biological_process	0.0568314	0.285545		GO:0030027	lamellipodium	cellular_component	0.0336498	0.177683
GO:0008064	regulation of actin polymerization or depolymerization	biological_process	0.0570805	0.286546		GO:0035004	phosphatidylinositol 3-kinase activity	molecular_function	0.0274126	0.179222
GO:0031984	organelle subcompartment	cellular_component	0.106341	0.288639		GO:0042813	Wnt-activated receptor activity	molecular_function	0.0277568	0.180229
GO:0000153	cytoplasmic ubiquitin ligase complex	cellular_component	0.108035	0.288708		GO:0050777	negative regulation of immune response	biological_process	0.0487099	0.180539
GO:0030127	COPII vesicle coat	cellular_component	0.108035	0.288708		GO:0048565	digestive tract development	biological_process	0.0493674	0.182478
GO:0030128	clathrin coat of endocytic vesicle	cellular_component	0.108035	0.288708		GO:0048736	appendage development	biological_process	0.0493704	0.182478
GO:0030677	ribonuclease P complex	cellular_component	0.108035	0.288708		GO:0060173	limb development	biological_process	0.0493704	0.182478
GO:0005640	nuclear outer membrane	cellular_component	0.109241	0.288708		GO:0090090	negative regulation of canonical Wnt signaling pathway	biological_process	0.0493704	0.182478
GO:0071556	integral component of lumenal side of endoplasmic reticulum membrane	cellular_component	0.109241	0.288708		GO:0030427	site of polarized growth	cellular_component	0.0348995	0.182576
GO:0098553	lumenal side of endoplasmic reticulum membrane	cellular_component	0.109241	0.288708		GO:0043425	bHLH transcription factor binding	molecular_function	0.0286311	0.183394
GO:0005085	guanyl-nucleotide exchange factor activity	molecular_function	0.0757656	0.290074		GO:1904680	peptide transmembrane transporter activity	molecular_function	0.0286311	0.183394
GO:0012507	ER to Golgi transport vesicle membrane	cellular_component	0.110701	0.291235		GO:1903708	positive regulation of hemopoiesis	biological_process	0.0496856	0.183433
GO:0005669	transcription factor TFIID complex	cellular_component	0.111026	0.291235		GO:0007616	long-term memory	biological_process	0.0498427	0.183433
GO:0033138	positive regulation of peptidyl-serine phosphorylation	biological_process	0.0582181	0.292002		GO:0015949	nucleobase-containing small molecule interconversion	biological_process	0.0498427	0.183433
GO:0072655	establishment of protein localization to mitochondrion	biological_process	0.0584708	0.292009		GO:0032094	response to food	biological_process	0.0498427	0.183433
GO:0016601	Rac protein signal transduction	biological_process	0.0584727	0.292009		GO:0032801	receptor catabolic process	biological_process	0.0498427	0.183433
GO:0033120	positive regulation of RNA splicing	biological_process	0.0584727	0.292009		GO:1902475	L-alpha-amino acid transmembrane transport	biological_process	0.0498427	0.183433
GO:0044803	multi-organism membrane organization	biological_process	0.0584727	0.292009		GO:0001890	placenta development	biological_process	0.0498726	0.183433
GO:0060674	placenta blood vessel development	biological_process	0.0584727	0.292009		GO:0055002	striated muscle cell development	biological_process	0.0499047	0.183433
GO:0098562	cytoplasmic side of membrane	cellular_component	0.111737	0.292011		GO:0050769	positive regulation of neurogenesis	biological_process	0.0500772	0.183939
GO:0034248	regulation of cellular amide metabolic process	biological_process	0.0586837	0.292756		GO:0005977	glycogen metabolic process	biological_process	0.0501931	0.184059
GO:1903391	regulation of adherens junction organization	biological_process	0.058724	0.292756		GO:0032414	positive regulation of ion transmembrane transporter activity	biological_process	0.0501931	0.184059
GO:0045637	regulation of myeloid cell differentiation	biological_process	0.0588855	0.293308		GO:0009126	purine nucleoside monophosphate metabolic process	biological_process	0.0502483	0.184059
GO:0044272	sulfur compound biosynthetic process	biological_process	0.0590622	0.293934		GO:0009167	purine ribonucleoside monophosphate metabolic process	biological_process	0.0502483	0.184059
GO:0051648	vesicle localization	biological_process	0.0593551	0.295137		GO:0030135	coated vesicle	cellular_component	0.035533	0.184185
GO:0051881	regulation of mitochondrial membrane potential	biological_process	0.0594257	0.295233		GO:1903039	positive regulation of leukocyte cell-cell adhesion	biological_process	0.0504165	0.184548
GO:0043558	regulation of translational initiation in response to stress	biological_process	0.0597602	0.295621		GO:0007026	negative regulation of microtubule depolymerization	biological_process	0.0509969	0.185269
GO:0060575	intestinal epithelial cell differentiation	biological_process	0.0597602	0.295621		GO:0010804	negative regulation of tumor necrosis factor-mediated signaling pathway	biological_process	0.0509969	0.185269
GO:1901032	negative regulation of response to reactive oxygen species	biological_process	0.0597602	0.295621		GO:0033630	positive regulation of cell adhesion mediated by integrin	biological_process	0.0509969	0.185269
GO:1903204	negative regulation of oxidative stress-induced neuron death	biological_process	0.0597602	0.295621		GO:0050857	positive regulation of antigen receptor-mediated signaling pathway	biological_process	0.0509969	0.185269
GO:1903206	negative regulation of hydrogen peroxide-induced cell death	biological_process	0.0597602	0.295621		GO:0055083	monovalent inorganic anion homeostasis	biological_process	0.0509969	0.185269
GO:0005159	insulin-like growth factor receptor binding	molecular_function	0.0787599	0.296248		GO:1901623	regulation of lymphocyte chemotaxis	biological_process	0.0509969	0.185269
GO:0008409	5'-3' exonuclease activity	molecular_function	0.0787599	0.296248		GO:1901685	glutathione derivative metabolic process	biological_process	0.0509969	0.185269
GO:0070402	NADPH binding	molecular_function	0.0787599	0.296248		GO:1901687	glutathione derivative biosynthetic process	biological_process	0.0509969	0.185269
GO:0070742	C2H2 zinc finger domain binding	molecular_function	0.0787599	0.296248		GO:1902001	fatty acid transmembrane transport	biological_process	0.0509969	0.185269
GO:1990381	ubiquitin-specific protease binding	molecular_function	0.0787599	0.296248		GO:1904738	vascular associated smooth muscle cell migration	biological_process	0.0509969	0.185269
GO:0033002	muscle cell proliferation	biological_process	0.0600225	0.296663		GO:1904752	regulation of vascular associated smooth muscle cell migration	biological_process	0.0509969	0.185269
GO:0046834	lipid phosphorylation	biological_process	0.060251	0.297538		GO:0007611	learning or memory	biological_process	0.0513787	0.186206
GO:0005774	vacuolar membrane	cellular_component	0.114746	0.298765		GO:0006639	acylglycerol metabolic process	biological_process	0.051395	0.186206
GO:1902562	H4 histone acetyltransferase complex	cellular_component	0.115266	0.29901		GO:0044070	regulation of anion transport	biological_process	0.051395	0.186206
GO:0030511	positive regulation of transforming growth factor beta receptor signaling pathway	biological_process	0.0611209	0.29978		GO:0055007	cardiac muscle cell differentiation	biological_process	0.051395	0.186206
GO:0035336	long-chain fatty-acyl-CoA metabolic process	biological_process	0.0611209	0.29978		GO:0042308	negative regulation of protein import into nucleus	biological_process	0.051784	0.187055
GO:0043243	positive regulation of protein complex disassembly	biological_process	0.0611209	0.29978		GO:1904590	negative regulation of protein import	biological_process	0.051784	0.187055
GO:0043628	ncRNA 3'-end processing	biological_process	0.0611209	0.29978		GO:0006700	C21-steroid hormone biosynthetic process	biological_process	0.0520517	0.187055
GO:0061311	cell surface receptor signaling pathway involved in heart development	biological_process	0.0611209	0.29978		GO:0007205	protein kinase C-activating G-protein coupled receptor signaling pathway	biological_process	0.0520517	0.187055
GO:1903846	positive regulation of cellular response to transforming growth factor beta stimulus	biological_process	0.0611209	0.29978		GO:0010453	regulation of cell fate commitment	biological_process	0.0520517	0.187055
GO:1904030	negative regulation of cyclin-dependent protein kinase activity	biological_process	0.0611209	0.29978		GO:0022011	myelination in peripheral nervous system	biological_process	0.0520517	0.187055
GO:0071482	cellular response to light stimulus	biological_process	0.0616167	0.29978		GO:0032292	peripheral nervous system axon ensheathment	biological_process	0.0520517	0.187055
GO:2001237	negative regulation of extrinsic apoptotic signaling pathway	biological_process	0.0616167	0.29978		GO:0036475	neuron death in response to oxidative stress	biological_process	0.0520517	0.187055
GO:0043462	regulation of ATPase activity	biological_process	0.0616215	0.29978		GO:0040001	establishment of mitotic spindle localization	biological_process	0.0520517	0.187055
GO:0035264	multicellular organism growth	biological_process	0.0616532	0.29978		GO:0043537	negative regulation of blood vessel endothelial cell migration	biological_process	0.0520517	0.187055
GO:0021782	glial cell development	biological_process	0.0616967	0.29978		GO:0048679	regulation of axon regeneration	biological_process	0.0520517	0.187055
GO:0048144	fibroblast proliferation	biological_process	0.0616967	0.29978		GO:0072606	interleukin-8 secretion	biological_process	0.0520517	0.187055
GO:0006378	mRNA polyadenylation	biological_process	0.0618923	0.29978		GO:0035296	regulation of tube diameter	biological_process	0.0522621	0.187453
GO:0009743	response to carbohydrate	biological_process	0.0619134	0.29978		GO:0097746	regulation of blood vessel diameter	biological_process	0.0522621	0.187453
GO:0046578	regulation of Ras protein signal transduction	biological_process	0.0619134	0.29978		GO:0007159	leukocyte cell-cell adhesion	biological_process	0.0522683	0.187453
GO:0009749	response to glucose	biological_process	0.0621289	0.29978		GO:0010771	negative regulation of cell morphogenesis involved in differentiation	biological_process	0.0524796	0.187707
GO:0016052	carbohydrate catabolic process	biological_process	0.0621289	0.29978		GO:0045638	negative regulation of myeloid cell differentiation	biological_process	0.0524796	0.187707
GO:0055076	transition metal ion homeostasis	biological_process	0.062393	0.29978		GO:0072332	intrinsic apoptotic signaling pathway by p53 class mediator	biological_process	0.0524796	0.187707
GO:0001833	inner cell mass cell proliferation	biological_process	0.0626817	0.29978		GO:0042982	amyloid precursor protein metabolic process	biological_process	0.0525509	0.187707
GO:0006264	mitochondrial DNA replication	biological_process	0.0626817	0.29978		GO:0060323	head morphogenesis	biological_process	0.0525509	0.187707
GO:0009313	oligosaccharide catabolic process	biological_process	0.0626817	0.29978		GO:2000351	regulation of endothelial cell apoptotic process	biological_process	0.0525509	0.187707
GO:0010893	positive regulation of steroid biosynthetic process	biological_process	0.0626817	0.29978		GO:0007498	mesoderm development	biological_process	0.0527948	0.188095
GO:0033262	regulation of nuclear cell cycle DNA replication	biological_process	0.0626817	0.29978		GO:0009135	purine nucleoside diphosphate metabolic process	biological_process	0.0527948	0.188095
GO:0035518	histone H2A monoubiquitination	biological_process	0.0626817	0.29978		GO:0009179	purine ribonucleoside diphosphate metabolic process	biological_process	0.0527948	0.188095
GO:0043518	negative regulation of DNA damage response, signal transduction by p53 class mediator	biological_process	0.0626817	0.29978		GO:0007588	excretion	biological_process	0.0529225	0.188095
GO:0046040	IMP metabolic process	biological_process	0.0626817	0.29978		GO:0032677	regulation of interleukin-8 production	biological_process	0.0529225	0.188095
GO:0046479	glycosphingolipid catabolic process	biological_process	0.0626817	0.29978		GO:0034121	regulation of toll-like receptor signaling pathway	biological_process	0.0529225	0.188095
GO:0051103	DNA ligation involved in DNA repair	biological_process	0.0626817	0.29978		GO:1902305	regulation of sodium ion transmembrane transport	biological_process	0.0529225	0.188095
GO:0060977	coronary vasculature morphogenesis	biological_process	0.0626817	0.29978		GO:0046661	male sex differentiation	biological_process	0.0529427	0.188095
GO:0061684	chaperone-mediated autophagy	biological_process	0.0626817	0.29978		GO:0055123	digestive system development	biological_process	0.0530543	0.188366
GO:0070431	nucleotide-binding oligomerization domain containing 2 signaling pathway	biological_process	0.0626817	0.29978		GO:0005978	glycogen biosynthetic process	biological_process	0.053328	0.188959
GO:0071481	cellular response to X-ray	biological_process	0.0626817	0.29978		GO:0009250	glucan biosynthetic process	biological_process	0.053328	0.188959
GO:0090110	cargo loading into COPII-coated vesicle	biological_process	0.0626817	0.29978		GO:0045600	positive regulation of fat cell differentiation	biological_process	0.053328	0.188959
GO:0090179	planar cell polarity pathway involved in neural tube closure	biological_process	0.0626817	0.29978		GO:0090317	negative regulation of intracellular protein transport	biological_process	0.0541272	0.190778
GO:0090239	regulation of histone H4 acetylation	biological_process	0.0626817	0.29978		GO:0042176	regulation of protein catabolic process	biological_process	0.0542489	0.190778
GO:1901836	regulation of transcription of nuclear large rRNA transcript from RNA polymerase I promoter	biological_process	0.0626817	0.29978		GO:0006073	cellular glucan metabolic process	biological_process	0.0547325	0.190778
GO:2000781	positive regulation of double-strand break repair	biological_process	0.0626817	0.29978		GO:0044042	glucan metabolic process	biological_process	0.0547325	0.190778
GO:0005719	nuclear euchromatin	cellular_component	0.116613	0.300289		GO:0046902	regulation of mitochondrial membrane permeability	biological_process	0.0547325	0.190778
GO:0030125	clathrin vesicle coat	cellular_component	0.116613	0.300289		GO:0097006	regulation of plasma lipoprotein particle levels	biological_process	0.0547325	0.190778
GO:0006368	transcription elongation from RNA polymerase II promoter	biological_process	0.062958	0.300851		GO:0006638	neutral lipid metabolic process	biological_process	0.0552639	0.190778
GO:0043687	post-translational protein modification	biological_process	0.0632252	0.301275		GO:0048675	axon extension	biological_process	0.0552639	0.190778
GO:1905475	regulation of protein localization to membrane	biological_process	0.0633595	0.301275		GO:0002674	negative regulation of acute inflammatory response	biological_process	0.0553199	0.190778
GO:0030901	midbrain development	biological_process	0.0633836	0.301275		GO:0003085	negative regulation of systemic arterial blood pressure	biological_process	0.0553199	0.190778
GO:0060996	dendritic spine development	biological_process	0.0633836	0.301275		GO:0006531	aspartate metabolic process	biological_process	0.0553199	0.190778
GO:0001893	maternal placenta development	biological_process	0.0634126	0.301275		GO:0007028	cytoplasm organization	biological_process	0.0553199	0.190778
GO:0032757	positive regulation of interleukin-8 production	biological_process	0.0634126	0.301275		GO:0015697	quaternary ammonium group transport	biological_process	0.0553199	0.190778
GO:0035196	production of miRNAs involved in gene silencing by miRNA	biological_process	0.0634126	0.301275		GO:0019371	cyclooxygenase pathway	biological_process	0.0553199	0.190778
GO:0043028	cysteine-type endopeptidase regulator activity involved in apoptotic process	molecular_function	0.0804535	0.30156		GO:0031115	negative regulation of microtubule polymerization	biological_process	0.0553199	0.190778
GO:0051403	stress-activated MAPK cascade	biological_process	0.0642073	0.3048		GO:0032463	negative regulation of protein homooligomerization	biological_process	0.0553199	0.190778
GO:0006909	phagocytosis	biological_process	0.0645953	0.306389		GO:0032836	glomerular basement membrane development	biological_process	0.0553199	0.190778
GO:0034284	response to monosaccharide	biological_process	0.0648096	0.307153		GO:0034331	cell junction maintenance	biological_process	0.0553199	0.190778
GO:0090066	regulation of anatomical structure size	biological_process	0.0653695	0.309552		GO:0035330	regulation of hippo signaling	biological_process	0.0553199	0.190778
GO:0043401	steroid hormone mediated signaling pathway	biological_process	0.0654576	0.309613		GO:0035404	histone-serine phosphorylation	biological_process	0.0553199	0.190778
GO:0032480	negative regulation of type I interferon production	biological_process	0.0654898	0.309613		GO:0036500	ATF6-mediated unfolded protein response	biological_process	0.0553199	0.190778
GO:0006400	tRNA modification	biological_process	0.0658611	0.311113		GO:0038063	collagen-activated tyrosine kinase receptor signaling pathway	biological_process	0.0553199	0.190778
GO:0098563	intrinsic component of synaptic vesicle membrane	cellular_component	0.121269	0.311139		GO:0051608	histamine transport	biological_process	0.0553199	0.190778
GO:0070997	neuron death	biological_process	0.0660882	0.31193		GO:0051709	regulation of killing of cells of other organism	biological_process	0.0553199	0.190778
GO:0051090	regulation of sequence-specific DNA binding transcription factor activity	biological_process	0.0664992	0.313613		GO:0051818	disruption of cells of other organism involved in symbiotic interaction	biological_process	0.0553199	0.190778
GO:0032006	regulation of TOR signaling	biological_process	0.0666546	0.314089		GO:0051883	killing of cells in other organism involved in symbiotic interaction	biological_process	0.0553199	0.190778
GO:0046785	microtubule polymerization	biological_process	0.0670058	0.315486		GO:0055015	ventricular cardiac muscle cell development	biological_process	0.0553199	0.190778
GO:0030832	regulation of actin filament length	biological_process	0.0674124	0.316971		GO:0055062	phosphate ion homeostasis	biological_process	0.0553199	0.190778
GO:0046467	membrane lipid biosynthetic process	biological_process	0.0675224	0.316971		GO:0060137	maternal process involved in parturition	biological_process	0.0553199	0.190778
GO:0033137	negative regulation of peptidyl-serine phosphorylation	biological_process	0.0677613	0.316971		GO:0060600	dichotomous subdivision of an epithelial terminal unit	biological_process	0.0553199	0.190778
GO:0045746	negative regulation of Notch signaling pathway	biological_process	0.0677613	0.316971		GO:0070970	interleukin-2 secretion	biological_process	0.0553199	0.190778
GO:0060765	regulation of androgen receptor signaling pathway	biological_process	0.0677613	0.316971		GO:0071436	sodium ion export	biological_process	0.0553199	0.190778
GO:1902253	regulation of intrinsic apoptotic signaling pathway by p53 class mediator	biological_process	0.0677613	0.316971		GO:0072203	cell proliferation involved in metanephros development	biological_process	0.0553199	0.190778
GO:1904353	regulation of telomere capping	biological_process	0.0677613	0.316971		GO:0072505	divalent inorganic anion homeostasis	biological_process	0.0553199	0.190778
GO:1904357	negative regulation of telomere maintenance via telomere lengthening	biological_process	0.0677613	0.316971		GO:0072506	trivalent inorganic anion homeostasis	biological_process	0.0553199	0.190778
GO:0033048	negative regulation of mitotic sister chromatid segregation	biological_process	0.0681571	0.317791		GO:0090557	establishment of endothelial intestinal barrier	biological_process	0.0553199	0.190778
GO:0043666	regulation of phosphoprotein phosphatase activity	biological_process	0.0681571	0.317791		GO:1901978	positive regulation of cell cycle checkpoint	biological_process	0.0553199	0.190778
GO:0090342	regulation of cell aging	biological_process	0.0681571	0.317791		GO:1902369	negative regulation of RNA catabolic process	biological_process	0.0553199	0.190778
GO:1901799	negative regulation of proteasomal protein catabolic process	biological_process	0.0681571	0.317791		GO:1903726	negative regulation of phospholipid metabolic process	biological_process	0.0553199	0.190778
GO:0048010	vascular endothelial growth factor receptor signaling pathway	biological_process	0.0682398	0.317919		GO:1903897	regulation of PERK-mediated unfolded protein response	biological_process	0.0553199	0.190778
GO:0031234	extrinsic component of cytoplasmic side of plasma membrane	cellular_component	0.124634	0.318611		GO:1904706	negative regulation of vascular smooth muscle cell proliferation	biological_process	0.0553199	0.190778
GO:0051058	negative regulation of small GTPase mediated signal transduction	biological_process	0.0689693	0.319336		GO:0010498	proteasomal protein catabolic process	biological_process	0.055349	0.190778
GO:0046474	glycerophospholipid biosynthetic process	biological_process	0.0690257	0.319336		GO:1904724	tertiary granule lumen	cellular_component	0.0372036	0.191091
GO:0048659	smooth muscle cell proliferation	biological_process	0.0693089	0.319336		GO:0000776	kinetochore	cellular_component	0.0376636	0.191711
GO:0000423	macromitophagy	biological_process	0.0693197	0.319336		GO:0030178	negative regulation of Wnt signaling pathway	biological_process	0.0558216	0.192282
GO:0032373	positive regulation of sterol transport	biological_process	0.0693197	0.319336		GO:0006875	cellular metal ion homeostasis	biological_process	0.055919	0.192493
GO:0032376	positive regulation of cholesterol transport	biological_process	0.0693197	0.319336		GO:0044774	mitotic DNA integrity checkpoint	biological_process	0.0559899	0.192613
GO:0042772	DNA damage response, signal transduction resulting in transcription	biological_process	0.0693197	0.319336		GO:0035257	nuclear hormone receptor binding	molecular_function	0.0303628	0.193181
GO:0044342	type B pancreatic cell proliferation	biological_process	0.0693197	0.319336		GO:0032479	regulation of type I interferon production	biological_process	0.0563842	0.193844
GO:0044804	nucleophagy	biological_process	0.0693197	0.319336		GO:0015980	energy derivation by oxidation of organic compounds	biological_process	0.0567534	0.19477
GO:0046653	tetrahydrofolate metabolic process	biological_process	0.0693197	0.319336		GO:0046427	positive regulation of JAK-STAT cascade	biological_process	0.0567636	0.19477
GO:0051654	establishment of mitochondrion localization	biological_process	0.0693197	0.319336		GO:1904894	positive regulation of STAT cascade	biological_process	0.0567636	0.19477
GO:0071157	negative regulation of cell cycle arrest	biological_process	0.0693197	0.319336		GO:0006112	energy reserve metabolic process	biological_process	0.0568635	0.194861
GO:1902176	negative regulation of oxidative stress-induced intrinsic apoptotic signaling pathway	biological_process	0.0693197	0.319336		GO:1904375	regulation of protein localization to cell periphery	biological_process	0.0568635	0.194861
GO:2000778	positive regulation of interleukin-6 secretion	biological_process	0.0693197	0.319336		GO:0007548	sex differentiation	biological_process	0.0569343	0.194978
GO:0000910	cytokinesis	biological_process	0.0694595	0.319725		GO:0001659	temperature homeostasis	biological_process	0.0572448	0.195412
GO:0051851	modification by host of symbiont morphology or physiology	biological_process	0.069616	0.320189		GO:0030261	chromosome condensation	biological_process	0.0572448	0.195412
GO:0035064	methylated histone binding	molecular_function	0.0859259	0.32095		GO:0090218	positive regulation of lipid kinase activity	biological_process	0.0572448	0.195412
GO:0010717	regulation of epithelial to mesenchymal transition	biological_process	0.0699028	0.320996		GO:1900739	regulation of protein insertion into mitochondrial membrane involved in apoptotic signaling pathway	biological_process	0.0572448	0.195412
GO:0019319	hexose biosynthetic process	biological_process	0.0699028	0.320996		GO:1900740	positive regulation of protein insertion into mitochondrial membrane involved in apoptotic signaling pathway	biological_process	0.0572448	0.195412
GO:0004702	signal transducer, downstream of receptor, with serine/threonine kinase activity	molecular_function	0.086325	0.321321		GO:0045165	cell fate commitment	biological_process	0.0576413	0.196513
GO:0010822	positive regulation of mitochondrion organization	biological_process	0.0704462	0.323234		GO:0048705	skeletal system morphogenesis	biological_process	0.0576413	0.196513
GO:0032279	asymmetric synapse	cellular_component	0.127818	0.325566		GO:0005496	steroid binding	molecular_function	0.0312659	0.197601
GO:0006096	glycolytic process	biological_process	0.0713123	0.326787		GO:0031396	regulation of protein ubiquitination	biological_process	0.0581121	0.197991
GO:0009132	nucleoside diphosphate metabolic process	biological_process	0.0713341	0.326787		GO:0007050	cell cycle arrest	biological_process	0.0582623	0.198212
GO:0043467	regulation of generation of precursor metabolites and energy	biological_process	0.0716901	0.328157		GO:0051146	striated muscle cell differentiation	biological_process	0.0582623	0.198212
GO:0044282	small molecule catabolic process	biological_process	0.0717648	0.328238		GO:2000060	positive regulation of protein ubiquitination involved in ubiquitin-dependent protein catabolic process	biological_process	0.0583505	0.198212
GO:0006809	nitric oxide biosynthetic process	biological_process	0.0721532	0.329008		GO:0001836	release of cytochrome c from mitochondria	biological_process	0.0584007	0.198212
GO:0033692	cellular polysaccharide biosynthetic process	biological_process	0.0721532	0.329008		GO:0010803	regulation of tumor necrosis factor-mediated signaling pathway	biological_process	0.0584007	0.198212
GO:0005978	glycogen biosynthetic process	biological_process	0.0723326	0.329008		GO:2001244	positive regulation of intrinsic apoptotic signaling pathway	biological_process	0.0584007	0.198212
GO:0009250	glucan biosynthetic process	biological_process	0.0723326	0.329008		GO:0009408	response to heat	biological_process	0.0589323	0.199725
GO:0045071	negative regulation of viral genome replication	biological_process	0.0723326	0.329008		GO:0042398	cellular modified amino acid biosynthetic process	biological_process	0.0592373	0.199725
GO:0051893	regulation of focal adhesion assembly	biological_process	0.0723326	0.329008		GO:1901224	positive regulation of NIK/NF-kappaB signaling	biological_process	0.0592373	0.199725
GO:0090109	regulation of cell-substrate junction assembly	biological_process	0.0723326	0.329008		GO:1903793	positive regulation of anion transport	biological_process	0.0592373	0.199725
GO:0031902	late endosome membrane	cellular_component	0.129659	0.329061		GO:0046031	ADP metabolic process	biological_process	0.0593271	0.199725
GO:0003746	translation elongation factor activity	molecular_function	0.0893252	0.330195		GO:0009311	oligosaccharide metabolic process	biological_process	0.0593726	0.199725
GO:0015035	protein disulfide oxidoreductase activity	molecular_function	0.0893252	0.330195		GO:0043550	regulation of lipid kinase activity	biological_process	0.0593726	0.199725
GO:0033046	negative regulation of sister chromatid segregation	biological_process	0.0727085	0.330196		GO:0046503	glycerolipid catabolic process	biological_process	0.0593726	0.199725
GO:0051985	negative regulation of chromosome segregation	biological_process	0.0727085	0.330196		GO:0051205	protein insertion into membrane	biological_process	0.0593726	0.199725
GO:0032580	Golgi cisterna membrane	cellular_component	0.131061	0.330283		GO:0060038	cardiac muscle cell proliferation	biological_process	0.0593726	0.199725
GO:0031901	early endosome membrane	cellular_component	0.13108	0.330283		GO:0060688	regulation of morphogenesis of a branching structure	biological_process	0.0593726	0.199725
GO:0009135	purine nucleoside diphosphate metabolic process	biological_process	0.0728481	0.33031		GO:0061005	cell differentiation involved in kidney development	biological_process	0.0593726	0.199725
GO:0009179	purine ribonucleoside diphosphate metabolic process	biological_process	0.0728481	0.33031		GO:0097755	positive regulation of blood vessel diameter	biological_process	0.0593726	0.199725
GO:0070603	SWI/SNF superfamily-type complex	cellular_component	0.132584	0.331751		GO:1901028	regulation of mitochondrial outer membrane permeabilization involved in apoptotic signaling pathway	biological_process	0.0593726	0.199725
GO:0016327	apicolateral plasma membrane	cellular_component	0.132606	0.331751		GO:0051436	negative regulation of ubiquitin-protein ligase activity involved in mitotic cell cycle	biological_process	0.0595375	0.200153
GO:0005777	peroxisome	cellular_component	0.133598	0.33187		GO:0009132	nucleoside diphosphate metabolic process	biological_process	0.0598838	0.200978
GO:0042579	microbody	cellular_component	0.133598	0.33187		GO:0051592	response to calcium ion	biological_process	0.0598962	0.200978
GO:0071216	cellular response to biotic stimulus	biological_process	0.0733059	0.332124		GO:1905477	positive regulation of protein localization to membrane	biological_process	0.0598962	0.200978
GO:0043296	apical junction complex	cellular_component	0.134711	0.332524		GO:0001837	epithelial to mesenchymal transition	biological_process	0.0601176	0.201282
GO:0030894	replisome	cellular_component	0.134807	0.332524		GO:0009185	ribonucleoside diphosphate metabolic process	biological_process	0.0601386	0.201282
GO:0019005	SCF ubiquitin ligase complex	cellular_component	0.135356	0.332712		GO:0030856	regulation of epithelial cell differentiation	biological_process	0.0601386	0.201282
GO:0004549	tRNA-specific ribonuclease activity	molecular_function	0.0918301	0.333701		GO:0032606	type I interferon production	biological_process	0.0601386	0.201282
GO:0008656	cysteine-type endopeptidase activator activity involved in apoptotic process	molecular_function	0.0918301	0.333701		GO:0006959	humoral immune response	biological_process	0.0606048	0.202715
GO:0015215	nucleotide transmembrane transporter activity	molecular_function	0.0918301	0.333701		GO:0002701	negative regulation of production of molecular mediator of immune response	biological_process	0.0610207	0.203211
GO:0031435	mitogen-activated protein kinase kinase kinase binding	molecular_function	0.0918301	0.333701		GO:0009065	glutamine family amino acid catabolic process	biological_process	0.0610207	0.203211
GO:0070182	DNA polymerase binding	molecular_function	0.0918301	0.333701		GO:0032461	positive regulation of protein oligomerization	biological_process	0.0610207	0.203211
GO:0071222	cellular response to lipopolysaccharide	biological_process	0.0740328	0.333707		GO:0032528	microvillus organization	biological_process	0.0610207	0.203211
GO:0001937	negative regulation of endothelial cell proliferation	biological_process	0.0740605	0.333707		GO:0035336	long-chain fatty-acyl-CoA metabolic process	biological_process	0.0610207	0.203211
GO:0021799	cerebral cortex radially oriented cell migration	biological_process	0.0740605	0.333707		GO:0035412	regulation of catenin import into nucleus	biological_process	0.0610207	0.203211
GO:0035666	TRIF-dependent toll-like receptor signaling pathway	biological_process	0.0740605	0.333707		GO:0040036	regulation of fibroblast growth factor receptor signaling pathway	biological_process	0.0610207	0.203211
GO:0048147	negative regulation of fibroblast proliferation	biological_process	0.0740605	0.333707		GO:0070301	cellular response to hydrogen peroxide	biological_process	0.0614859	0.203472
GO:0070229	negative regulation of lymphocyte apoptotic process	biological_process	0.0740605	0.333707		GO:1901655	cellular response to ketone	biological_process	0.0614859	0.203472
GO:1902175	regulation of oxidative stress-induced intrinsic apoptotic signaling pathway	biological_process	0.0740605	0.333707		GO:0046034	ATP metabolic process	biological_process	0.0616469	0.203472
GO:0010507	negative regulation of autophagy	biological_process	0.0746188	0.335697		GO:0006970	response to osmotic stress	biological_process	0.0620468	0.203472
GO:0051702	interaction with symbiont	biological_process	0.0746188	0.335697		GO:0032755	positive regulation of interleukin-6 production	biological_process	0.0620468	0.203472
GO:0001667	ameboidal-type cell migration	biological_process	0.0747174	0.335879		GO:0046849	bone remodeling	biological_process	0.0620468	0.203472
GO:0008374	O-acyltransferase activity	molecular_function	0.0931453	0.337337		GO:0001710	mesodermal cell fate commitment	biological_process	0.0620562	0.203472
GO:0070228	regulation of lymphocyte apoptotic process	biological_process	0.0755825	0.338831		GO:0006063	uronic acid metabolic process	biological_process	0.0620562	0.203472
GO:1905818	regulation of chromosome separation	biological_process	0.0755825	0.338831		GO:0006577	amino-acid betaine metabolic process	biological_process	0.0620562	0.203472
GO:0048145	regulation of fibroblast proliferation	biological_process	0.0756094	0.338831		GO:0019585	glucuronate metabolic process	biological_process	0.0620562	0.203472
GO:1903729	regulation of plasma membrane organization	biological_process	0.0756094	0.338831		GO:0032682	negative regulation of chemokine production	biological_process	0.0620562	0.203472
GO:0000479	endonucleolytic cleavage of tricistronic rRNA transcript (SSU-rRNA, 5.8S rRNA, LSU-rRNA)	biological_process	0.0767453	0.338914		GO:0033622	integrin activation	biological_process	0.0620562	0.203472
GO:0002374	cytokine secretion involved in immune response	biological_process	0.0767453	0.338914		GO:0034143	regulation of toll-like receptor 4 signaling pathway	biological_process	0.0620562	0.203472
GO:0003417	growth plate cartilage development	biological_process	0.0767453	0.338914		GO:0034501	protein localization to kinetochore	biological_process	0.0620562	0.203472
GO:0006047	UDP-N-acetylglucosamine metabolic process	biological_process	0.0767453	0.338914		GO:0035313	wound healing, spreading of epidermal cells	biological_process	0.0620562	0.203472
GO:0006346	methylation-dependent chromatin silencing	biological_process	0.0767453	0.338914		GO:0043558	regulation of translational initiation in response to stress	biological_process	0.0620562	0.203472
GO:0015865	purine nucleotide transport	biological_process	0.0767453	0.338914		GO:0044346	fibroblast apoptotic process	biological_process	0.0620562	0.203472
GO:0018216	peptidyl-arginine methylation	biological_process	0.0767453	0.338914		GO:0048268	clathrin coat assembly	biological_process	0.0620562	0.203472
GO:0019081	viral translation	biological_process	0.0767453	0.338914		GO:0055098	response to low-density lipoprotein particle	biological_process	0.0620562	0.203472
GO:0034356	NAD biosynthesis via nicotinamide riboside salvage pathway	biological_process	0.0767453	0.338914		GO:0055119	relaxation of cardiac muscle	biological_process	0.0620562	0.203472
GO:0034616	response to laminar fluid shear stress	biological_process	0.0767453	0.338914		GO:0071402	cellular response to lipoprotein particle stimulus	biological_process	0.0620562	0.203472
GO:0035269	protein O-linked mannosylation	biological_process	0.0767453	0.338914		GO:1903672	positive regulation of sprouting angiogenesis	biological_process	0.0620562	0.203472
GO:0036315	cellular response to sterol	biological_process	0.0767453	0.338914		GO:2000637	positive regulation of gene silencing by miRNA	biological_process	0.0620562	0.203472
GO:0048313	Golgi inheritance	biological_process	0.0767453	0.338914		GO:2000641	regulation of early endosome to late endosome transport	biological_process	0.0620562	0.203472
GO:0048841	regulation of axon extension involved in axon guidance	biological_process	0.0767453	0.338914		GO:2000727	positive regulation of cardiac muscle cell differentiation	biological_process	0.0620562	0.203472
GO:0071850	mitotic cell cycle arrest	biological_process	0.0767453	0.338914		GO:0006022	aminoglycan metabolic process	biological_process	0.0622651	0.203786
GO:1904923	regulation of mitophagy in response to mitochondrial depolarization	biological_process	0.0767453	0.338914		GO:0043112	receptor metabolic process	biological_process	0.0622651	0.203786
GO:1904925	positive regulation of mitophagy in response to mitochondrial depolarization	biological_process	0.0767453	0.338914		GO:0050808	synapse organization	biological_process	0.0622669	0.203786
GO:2000136	regulation of cell proliferation involved in heart morphogenesis	biological_process	0.0767453	0.338914		GO:0030017	sarcomere	cellular_component	0.0405826	0.20381
GO:2000765	regulation of cytoplasmic translation	biological_process	0.0767453	0.338914		GO:0035578	azurophil granule lumen	cellular_component	0.040762	0.20381
GO:0031301	integral component of organelle membrane	cellular_component	0.141167	0.339593		GO:0043235	receptor complex	cellular_component	0.0414275	0.205321
GO:0015629	actin cytoskeleton	cellular_component	0.141535	0.339593		GO:0010906	regulation of glucose metabolic process	biological_process	0.06279	0.205372
GO:0031300	intrinsic component of organelle membrane	cellular_component	0.142285	0.339593		GO:0007519	skeletal muscle tissue development	biological_process	0.0629469	0.205632
GO:0000242	pericentriolar material	cellular_component	0.142404	0.339593		GO:1903321	negative regulation of protein modification by small protein conjugation or removal	biological_process	0.0629469	0.205632
GO:0005849	mRNA cleavage factor complex	cellular_component	0.142404	0.339593		GO:0032872	regulation of stress-activated MAPK cascade	biological_process	0.0634235	0.207061
GO:0031258	lamellipodium membrane	cellular_component	0.142404	0.339593		GO:0044773	mitotic DNA damage checkpoint	biological_process	0.0635875	0.207342
GO:0014069	postsynaptic density	cellular_component	0.143659	0.339593		GO:0046834	lipid phosphorylation	biological_process	0.0635875	0.207342
GO:0000124	SAGA complex	cellular_component	0.144919	0.339593		GO:0005031	tumor necrosis factor-activated receptor activity	molecular_function	0.033838	0.208323
GO:0005832	chaperonin-containing T-complex	cellular_component	0.144919	0.339593		GO:0005035	death receptor activity	molecular_function	0.033838	0.208323
GO:0031618	nuclear pericentric heterochromatin	cellular_component	0.144919	0.339593		GO:0070330	aromatase activity	molecular_function	0.033838	0.208323
GO:0045240	dihydrolipoyl dehydrogenase complex	cellular_component	0.144919	0.339593		GO:0004712	protein serine/threonine/tyrosine kinase activity	molecular_function	0.0338416	0.208323
GO:0070938	contractile ring	cellular_component	0.144919	0.339593		GO:1902107	positive regulation of leukocyte differentiation	biological_process	0.0640602	0.208755
GO:0090543	Flemming body	cellular_component	0.144919	0.339593		GO:0031110	regulation of microtubule polymerization or depolymerization	biological_process	0.0642305	0.209182
GO:0098554	cytoplasmic side of endoplasmic reticulum membrane	cellular_component	0.144919	0.339593		GO:0030516	regulation of axon extension	biological_process	0.0646121	0.210296
GO:0006509	membrane protein ectodomain proteolysis	biological_process	0.0770712	0.340093		GO:0016763	transferase activity, transferring pentosyl groups	molecular_function	0.0343964	0.210373
GO:0090287	regulation of cellular response to growth factor stimulus	biological_process	0.0772372	0.340457		GO:0031570	DNA integrity checkpoint	biological_process	0.0648012	0.210782
GO:0008203	cholesterol metabolic process	biological_process	0.0772719	0.340457		GO:0070661	leukocyte proliferation	biological_process	0.0650619	0.211402
GO:0031109	microtubule polymerization or depolymerization	biological_process	0.0774207	0.340852		GO:0032731	positive regulation of interleukin-1 beta production	biological_process	0.0652702	0.211402
GO:0004725	protein tyrosine phosphatase activity	molecular_function	0.0948958	0.342519		GO:0060325	face morphogenesis	biological_process	0.0652702	0.211402
GO:0006293	nucleotide-excision repair, preincision complex stabilization	biological_process	0.0782238	0.342556		GO:0072348	sulfur compound transport	biological_process	0.0652702	0.211402
GO:0006295	nucleotide-excision repair, DNA incision, 3'-to lesion	biological_process	0.0782238	0.342556		GO:0097028	dendritic cell differentiation	biological_process	0.0652702	0.211402
GO:0030149	sphingolipid catabolic process	biological_process	0.0782238	0.342556		GO:0097421	liver regeneration	biological_process	0.0652702	0.211402
GO:0031954	positive regulation of protein autophosphorylation	biological_process	0.0782238	0.342556		GO:2000279	negative regulation of DNA biosynthetic process	biological_process	0.0652702	0.211402
GO:0033561	regulation of water loss via skin	biological_process	0.0782238	0.342556		GO:0051224	negative regulation of protein transport	biological_process	0.0659154	0.213362
GO:0060330	regulation of response to interferon-gamma	biological_process	0.0782238	0.342556		GO:0046982	protein heterodimerization activity	molecular_function	0.0351525	0.213619
GO:0070841	inclusion body assembly	biological_process	0.0782238	0.342556		GO:0006641	triglyceride metabolic process	biological_process	0.0663502	0.214353
GO:1905477	positive regulation of protein localization to membrane	biological_process	0.0784506	0.343288		GO:1903729	regulation of plasma membrane organization	biological_process	0.0663502	0.214353
GO:0060389	pathway-restricted SMAD protein phosphorylation	biological_process	0.0787221	0.344215		GO:0050701	interleukin-1 secretion	biological_process	0.0664232	0.214353
GO:0006665	sphingolipid metabolic process	biological_process	0.0790475	0.345376		GO:0060042	retina morphogenesis in camera-type eye	biological_process	0.0664232	0.214353
GO:0046794	transport of virus	biological_process	0.0793426	0.346403		GO:0060119	inner ear receptor cell development	biological_process	0.0664232	0.214353
GO:0010907	positive regulation of glucose metabolic process	biological_process	0.0800274	0.347811		GO:1903900	regulation of viral life cycle	biological_process	0.0671079	0.216431
GO:0046949	fatty-acyl-CoA biosynthetic process	biological_process	0.0800274	0.347811		GO:0031397	negative regulation of protein ubiquitination	biological_process	0.0672553	0.216775
GO:0060236	regulation of mitotic spindle organization	biological_process	0.0800274	0.347811		GO:0007043	cell-cell junction assembly	biological_process	0.0674487	0.217266
GO:1900739	regulation of protein insertion into mitochondrial membrane involved in apoptotic signaling pathway	biological_process	0.0800274	0.347811		GO:0034358	plasma lipoprotein particle	cellular_component	0.0446764	0.217605
GO:1900740	positive regulation of protein insertion into mitochondrial membrane involved in apoptotic signaling pathway	biological_process	0.0800274	0.347811		GO:1990777	lipoprotein particle	cellular_component	0.0446764	0.217605
GO:1902186	regulation of viral release from host cell	biological_process	0.0800274	0.347811		GO:0043620	regulation of DNA-templated transcription in response to stress	biological_process	0.0681513	0.219397
GO:0004709	MAP kinase kinase kinase activity	molecular_function	0.0973239	0.350105		GO:0035270	endocrine system development	biological_process	0.0682548	0.219597
GO:0000780	condensed nuclear chromosome, centromeric region	cellular_component	0.150939	0.350199		GO:0010008	endosome membrane	cellular_component	0.0454962	0.219704
GO:0000930	gamma-tubulin complex	cellular_component	0.150939	0.350199		GO:0005871	kinesin complex	cellular_component	0.0459752	0.220135
GO:0032839	dendrite cytoplasm	cellular_component	0.150939	0.350199		GO:0005640	nuclear outer membrane	cellular_component	0.0472678	0.220713
GO:0042752	regulation of circadian rhythm	biological_process	0.0809134	0.351277		GO:0030057	desmosome	cellular_component	0.0472678	0.220713
GO:0048660	regulation of smooth muscle cell proliferation	biological_process	0.0811018	0.351277		GO:0030125	clathrin vesicle coat	cellular_component	0.0472678	0.220713
GO:0000281	mitotic cytokinesis	biological_process	0.0812515	0.351277		GO:0048568	embryonic organ development	biological_process	0.0688016	0.221222
GO:0044003	modification by symbiont of host morphology or physiology	biological_process	0.0812515	0.351277		GO:0043531	ADP binding	molecular_function	0.036926	0.222589
GO:0048538	thymus development	biological_process	0.0812515	0.351277		GO:0030165	PDZ domain binding	molecular_function	0.0370982	0.222589
GO:0072665	protein localization to vacuole	biological_process	0.0812515	0.351277		GO:0009314	response to radiation	biological_process	0.0693106	0.222724
GO:2000107	negative regulation of leukocyte apoptotic process	biological_process	0.0812515	0.351277		GO:0048259	regulation of receptor-mediated endocytosis	biological_process	0.0699595	0.223391
GO:0003705	transcription factor activity, RNA polymerase II distal enhancer sequence-specific binding	molecular_function	0.0995781	0.35231		GO:0055001	muscle cell development	biological_process	0.0702974	0.223391
GO:0000987	core promoter proximal region sequence-specific DNA binding	molecular_function	0.0997996	0.35231		GO:0014855	striated muscle cell proliferation	biological_process	0.0704156	0.223391
GO:0016504	peptidase activator activity	molecular_function	0.0999088	0.35231		GO:0030032	lamellipodium assembly	biological_process	0.0704156	0.223391
GO:0036002	pre-mRNA binding	molecular_function	0.0999088	0.35231		GO:0048002	antigen processing and presentation of peptide antigen	biological_process	0.0705335	0.223391
GO:0042162	telomeric DNA binding	molecular_function	0.0999088	0.35231		GO:0097164	ammonium ion metabolic process	biological_process	0.0705335	0.223391
GO:0043531	ADP binding	molecular_function	0.0999088	0.35231		GO:0010639	negative regulation of organelle organization	biological_process	0.0706202	0.223391
GO:0035615	clathrin adaptor activity	molecular_function	0.101563	0.352422		GO:0010719	negative regulation of epithelial to mesenchymal transition	biological_process	0.0708073	0.223391
GO:0070628	proteasome binding	molecular_function	0.101563	0.352422		GO:0032647	regulation of interferon-alpha production	biological_process	0.0708073	0.223391
GO:0098748	endocytic adaptor activity	molecular_function	0.101563	0.352422		GO:0045992	negative regulation of embryonic development	biological_process	0.0708073	0.223391
GO:0001158	enhancer sequence-specific DNA binding	molecular_function	0.101584	0.352422		GO:0048668	collateral sprouting	biological_process	0.0708073	0.223391
GO:0001191	transcriptional repressor activity, RNA polymerase II transcription factor binding	molecular_function	0.101584	0.352422		GO:0071480	cellular response to gamma radiation	biological_process	0.0708073	0.223391
GO:0061515	myeloid cell development	biological_process	0.0817546	0.352923		GO:0002002	regulation of angiotensin levels in blood	biological_process	0.0710732	0.223391
GO:0070671	response to interleukin-12	biological_process	0.0817546	0.352923		GO:0002922	positive regulation of humoral immune response	biological_process	0.0710732	0.223391
GO:0031032	actomyosin structure organization	biological_process	0.0828663	0.357454		GO:0006853	carnitine shuttle	biological_process	0.0710732	0.223391
GO:0016646	oxidoreductase activity, acting on the CH-NH group of donors, NAD or NADP as acceptor	molecular_function	0.103612	0.358297		GO:0006983	ER overload response	biological_process	0.0710732	0.223391
GO:0043236	laminin binding	molecular_function	0.104768	0.359442		GO:0009886	post-embryonic animal morphogenesis	biological_process	0.0710732	0.223391
GO:0043548	phosphatidylinositol 3-kinase binding	molecular_function	0.104768	0.359442		GO:0014889	muscle atrophy	biological_process	0.0710732	0.223391
GO:0003755	peptidyl-prolyl cis-trans isomerase activity	molecular_function	0.104949	0.359442		GO:0016322	neuron remodeling	biological_process	0.0710732	0.223391
GO:0006094	gluconeogenesis	biological_process	0.0838021	0.36095		GO:0019852	L-ascorbic acid metabolic process	biological_process	0.0710732	0.223391
GO:1903076	regulation of protein localization to plasma membrane	biological_process	0.0838021	0.36095		GO:0021681	cerebellar granular layer development	biological_process	0.0710732	0.223391
GO:0005766	primary lysosome	cellular_component	0.157308	0.362582		GO:0035414	negative regulation of catenin import into nucleus	biological_process	0.0710732	0.223391
GO:0042582	azurophil granule	cellular_component	0.157308	0.362582		GO:0040037	negative regulation of fibroblast growth factor receptor signaling pathway	biological_process	0.0710732	0.223391
GO:0051402	neuron apoptotic process	biological_process	0.0842803	0.362739		GO:0043619	regulation of transcription from RNA polymerase II promoter in response to oxidative stress	biological_process	0.0710732	0.223391
GO:0048857	neural nucleus development	biological_process	0.0846838	0.363661		GO:0046185	aldehyde catabolic process	biological_process	0.0710732	0.223391
GO:0071359	cellular response to dsRNA	biological_process	0.0846838	0.363661		GO:0046349	amino sugar biosynthetic process	biological_process	0.0710732	0.223391
GO:2001244	positive regulation of intrinsic apoptotic signaling pathway	biological_process	0.0846838	0.363661		GO:0060099	regulation of phagocytosis, engulfment	biological_process	0.0710732	0.223391
GO:0005839	proteasome core complex	cellular_component	0.158429	0.363972		GO:0060177	regulation of angiotensin metabolic process	biological_process	0.0710732	0.223391
GO:0051494	negative regulation of cytoskeleton organization	biological_process	0.0848756	0.364213		GO:0060525	prostate glandular acinus development	biological_process	0.0710732	0.223391
GO:0009746	response to hexose	biological_process	0.0850129	0.364531		GO:0061469	regulation of type B pancreatic cell proliferation	biological_process	0.0710732	0.223391
GO:0050732	negative regulation of peptidyl-tyrosine phosphorylation	biological_process	0.085256	0.36503		GO:0070262	peptidyl-serine dephosphorylation	biological_process	0.0710732	0.223391
GO:0090199	regulation of release of cytochrome c from mitochondria	biological_process	0.085256	0.36503		GO:0071391	cellular response to estrogen stimulus	biological_process	0.0710732	0.223391
GO:0099572	postsynaptic specialization	cellular_component	0.160893	0.365218		GO:0090148	membrane fission	biological_process	0.0710732	0.223391
GO:0098984	neuron to neuron synapse	cellular_component	0.160915	0.365218		GO:0097062	dendritic spine maintenance	biological_process	0.0710732	0.223391
GO:0030285	integral component of synaptic vesicle membrane	cellular_component	0.162088	0.365218		GO:1902894	negative regulation of pri-miRNA transcription from RNA polymerase II promoter	biological_process	0.0710732	0.223391
GO:0031464	Cul4A-RING E3 ubiquitin ligase complex	cellular_component	0.162088	0.365218		GO:2000188	regulation of cholesterol homeostasis	biological_process	0.0710732	0.223391
GO:0045239	tricarboxylic acid cycle enzyme complex	cellular_component	0.162088	0.365218		GO:2000425	regulation of apoptotic cell clearance	biological_process	0.0710732	0.223391
GO:0097440	apical dendrite	cellular_component	0.162088	0.365218		GO:0051591	response to cAMP	biological_process	0.0714594	0.224472
GO:0071103	DNA conformation change	biological_process	0.0853877	0.365322		GO:0008509	anion transmembrane transporter activity	molecular_function	0.0377515	0.224476
GO:0001844	protein insertion into mitochondrial membrane involved in apoptotic signaling pathway	biological_process	0.0856756	0.36574		GO:0048029	monosaccharide binding	molecular_function	0.0378862	0.224476
GO:0006084	acetyl-CoA metabolic process	biological_process	0.0856756	0.36574		GO:0005884	actin filament	cellular_component	0.0490456	0.226603
GO:0072666	establishment of protein localization to vacuole	biological_process	0.0856756	0.36574		GO:0030658	transport vesicle membrane	cellular_component	0.0498738	0.226603
GO:0005977	glycogen metabolic process	biological_process	0.0859376	0.366		GO:0005901	caveola	cellular_component	0.0509129	0.226603
GO:0016125	sterol metabolic process	biological_process	0.0861099	0.366		GO:0008305	integrin complex	cellular_component	0.0514117	0.226603
GO:0051028	mRNA transport	biological_process	0.0861099	0.366		GO:0005916	fascia adherens	cellular_component	0.0517377	0.226603
GO:0001702	gastrulation with mouth forming second	biological_process	0.0864988	0.366		GO:0019774	proteasome core complex, beta-subunit complex	cellular_component	0.0517377	0.226603
GO:0006851	mitochondrial calcium ion transport	biological_process	0.0864988	0.366		GO:0033179	proton-transporting V-type ATPase, V0 domain	cellular_component	0.0517377	0.226603
GO:0007184	SMAD protein import into nucleus	biological_process	0.0864988	0.366		GO:0043083	synaptic cleft	cellular_component	0.0517377	0.226603
GO:0032232	negative regulation of actin filament bundle assembly	biological_process	0.0864988	0.366		GO:0016668	oxidoreductase activity, acting on a sulfur group of donors, NAD(P) as acceptor	molecular_function	0.0385002	0.226697
GO:0032401	establishment of melanosome localization	biological_process	0.0864988	0.366		GO:0001936	regulation of endothelial cell proliferation	biological_process	0.072329	0.226935
GO:0032469	endoplasmic reticulum calcium ion homeostasis	biological_process	0.0864988	0.366		GO:1903038	negative regulation of leukocyte cell-cell adhesion	biological_process	0.072329	0.226935
GO:0035883	enteroendocrine cell differentiation	biological_process	0.0864988	0.366		GO:0045766	positive regulation of angiogenesis	biological_process	0.072414	0.227068
GO:0036475	neuron death in response to oxidative stress	biological_process	0.0864988	0.366		GO:0019369	arachidonic acid metabolic process	biological_process	0.0727072	0.227117
GO:0040036	regulation of fibroblast growth factor receptor signaling pathway	biological_process	0.0864988	0.366		GO:0061178	regulation of insulin secretion involved in cellular response to glucose stimulus	biological_process	0.0727072	0.227117
GO:0007224	smoothened signaling pathway	biological_process	0.0872631	0.368964		GO:1904377	positive regulation of protein localization to cell periphery	biological_process	0.0727072	0.227117
GO:0006757	ATP generation from ADP	biological_process	0.0874084	0.369036		GO:0002700	regulation of production of molecular mediator of immune response	biological_process	0.0727107	0.227117
GO:0090101	negative regulation of transmembrane receptor protein serine/threonine kinase signaling pathway	biological_process	0.0874084	0.369036		GO:0010675	regulation of cellular carbohydrate metabolic process	biological_process	0.0727117	0.227117
GO:1905710	positive regulation of membrane permeability	biological_process	0.0875131	0.369208		GO:1903320	regulation of protein modification by small protein conjugation or removal	biological_process	0.0731804	0.227117
GO:1901888	regulation of cell junction assembly	biological_process	0.0880127	0.371044		GO:0032088	negative regulation of NF-kappaB transcription factor activity	biological_process	0.0735389	0.227117
GO:0016758	transferase activity, transferring hexosyl groups	molecular_function	0.108934	0.371903		GO:0001844	protein insertion into mitochondrial membrane involved in apoptotic signaling pathway	biological_process	0.0739194	0.227117
GO:0030071	regulation of mitotic metaphase/anaphase transition	biological_process	0.0890922	0.372697		GO:0002042	cell migration involved in sprouting angiogenesis	biological_process	0.0739194	0.227117
GO:0045839	negative regulation of mitotic nuclear division	biological_process	0.0890922	0.372697		GO:0002833	positive regulation of response to biotic stimulus	biological_process	0.0739194	0.227117
GO:1902099	regulation of metaphase/anaphase transition of cell cycle	biological_process	0.0890922	0.372697		GO:0014003	oligodendrocyte development	biological_process	0.0739194	0.227117
GO:0030033	microvillus assembly	biological_process	0.0894135	0.372697		GO:0033280	response to vitamin D	biological_process	0.0739194	0.227117
GO:0031114	regulation of microtubule depolymerization	biological_process	0.0894135	0.372697		GO:0043330	response to exogenous dsRNA	biological_process	0.0739194	0.227117
[truncated: 5,540 more rows]
