# Supplementary material for: The Specific Inhibition of SOD1 Selectively Promotes Apoptosis of Cancer Cells via Regulation of the ROS Signaling Network
Source: Oxid Med Cell Longev. 2019 Feb 18;2019:9706792. doi: 10.1155/2019/9706792 (PMC6398008; doi:10.1155/2019/9706792)
Supplement: Supplementary Materials — Figure S1: the levels of SOD1 in SOD1 knockdown HeLa cells and key DEGs in LD100-treated HeLa cells. Figure S2: SOD1 activity and H2O2 and O2 •− levels within LD100-treated DU145 and RWPE-1 cells. Figure S3: successful construction of mRNA sequencing in LD100-treated DU145 and RWPE-1 cells. Figure S4: many key genes in representative signaling pathways are selectively regulated upon the specific SOD1 inhibition. Figure S5: the specific SOD1 inhibition selectively regulates cancer pathways in cancer cells. Figure S6: many key genes in the cell cycle and p53 and apoptosis signaling pathways are selectively regulated upon the specific SOD1 inhibition. Figure S7: the specific SOD1 inhibition selectively activates the p53 signaling pathway in cancer cells. Figure S8: specific SOD1 inhibition represses the crosstalk of ERK, PI3K, and NF-κB signaling pathways in cancer cells. Figure S9: the specific SOD1 inhibition increases the intracellular peroxynitrite content. Figure S10: the specific SOD1 inhibition does not affect the growth and proliferation of normal cells. Table S1: quality evaluation of transcriptome library in HeLa cells. Table S2: GO classification of DEGs in LD100-treated and SOD1 knockdown HeLa cells. Table S3: KEGG pathway enrichment of DEGs in LD100-treated and SOD1 knockdown HeLa cells. Table S4: quality evaluation of transcriptome library in DU145 and RWPE-1 cells. Table S5: GO classification of DEGs in LD100-treated DU145 and RWPE-1 cells. Table S6: KEGG pathway enrichment of DEGs in LD100-treated DU145 and RWPE-1 cells. [file 9706792.f1.zip › Table S6.xls]

## Sheet: Sheet1
KEGG pathway enrichment of DEGs in LD100 treated DU145 cells					KEGG pathway enrichment of DEGs in LD100 treated RWPE-1 cells
Description	ID	p-Value	q-Value		Description	ID	p-Value	q-Value
Cellular senescence	hsa04218	1.22365e-06	0.000373212		p53 signaling pathway	hsa04115	7.74704e-07	0.000225439
Huntington's disease	hsa05016	3.35497e-06	0.000511633		Central carbon metabolism in cancer	hsa05230	2.46733e-06	0.00033984
Oxidative phosphorylation	hsa00190	5.83532e-06	0.000593258		Steroid biosynthesis	hsa00100	4.16724e-06	0.00033984
Chronic myeloid leukemia	hsa05220	3.69668e-05	0.00196004		Influenza A	hsa05164	4.67134e-06	0.00033984
Bladder cancer	hsa05219	4.13997e-05	0.00196004		Metabolism of xenobiotics by cytochrome P450	hsa00980	5.85391e-05	0.00289432
Alzheimer's disease	hsa05010	4.98374e-05	0.00196004		Steroid hormone biosynthesis	hsa00140	5.96767e-05	0.00289432
HTLV-I infection	hsa05166	5.2772e-05	0.00196004		Glutathione metabolism	hsa00480	0.000142738	0.00468851
Parkinson's disease	hsa05012	5.71263e-05	0.00196004		Ferroptosis	hsa04216	0.000144885	0.00468851
Ribosome	hsa03010	5.78373e-05	0.00196004		ECM-receptor interaction	hsa04512	0.000145005	0.00468851
Protein processing in endoplasmic reticulum	hsa04141	8.70819e-05	0.00258341		MicroRNAs in cancer	hsa05206	0.000186067	0.00541456
Epstein-Barr virus infection	hsa05169	9.31722e-05	0.00258341		Pathways in cancer	hsa05200	0.000310035	0.00820184
Autophagy - animal	hsa04140	0.000142453	0.00362067		Fluid shear stress and atherosclerosis	hsa05418	0.000758145	0.018385
Apoptosis	hsa04210	0.000210017	0.00457742		Glycerolipid metabolism	hsa00561	0.000962959	0.0205138
Hepatitis B	hsa05161	0.000217423	0.00457742		Mineral absorption	hsa04978	0.000986919	0.0205138
Non-alcoholic fatty liver disease (NAFLD)	hsa04932	0.000227262	0.00457742		Fatty acid metabolism	hsa01212	0.00110406	0.0206905
Endocytosis	hsa04144	0.000252681	0.00457742		Hepatitis C	hsa05160	0.00113762	0.0206905
Cell cycle	hsa04110	0.000255135	0.00457742		Measles	hsa05162	0.00122431	0.0209572
Renal cell carcinoma	hsa05211	0.000311256	0.00518883		Herpes simplex infection	hsa05168	0.00130425	0.0210854
Small cell lung cancer	hsa05222	0.000323238	0.00518883		Terpenoid backbone biosynthesis	hsa00900	0.00148441	0.0227349
Ubiquitin mediated proteolysis	hsa04120	0.000350805	0.00534977		Rheumatoid arthritis	hsa05323	0.00175945	0.0243816
Central carbon metabolism in cancer	hsa05230	0.000407798	0.00592279		Tryptophan metabolism	hsa00380	0.00175949	0.0243816
TNF signaling pathway	hsa04668	0.000509979	0.00703553		Collecting duct acid secretion	hsa04966	0.00206271	0.0264935
Neurotrophin signaling pathway	hsa04722	0.000549393	0.00703553		Chemical carcinogenesis	hsa05204	0.00209398	0.0264935
p53 signaling pathway	hsa04115	0.000553616	0.00703553		Human papillomavirus infection	hsa05165	0.00233572	0.0280151
Insulin resistance	hsa04931	0.000598327	0.00729958		Epithelial cell signaling in Helicobacter pylori infection	hsa05120	0.00247973	0.0280151
Mitophagy - animal	hsa04137	0.000640222	0.0075103		Rap1 signaling pathway	hsa04015	0.00250306	0.0280151
Insulin signaling pathway	hsa04910	0.000826506	0.00933646		Protein digestion and absorption	hsa04974	0.00269728	0.0290707
Prostate cancer	hsa05215	0.000946875	0.0103142		Bladder cancer	hsa05219	0.00341348	0.0354758
mTOR signaling pathway	hsa04150	0.00125143	0.0128393		Kaposi's sarcoma-associated herpesvirus infection	hsa05167	0.00363877	0.0365132
Proteasome	hsa03050	0.00126948	0.0128393		HTLV-I infection	hsa05166	0.00389255	0.0377577
ErbB signaling pathway	hsa04012	0.00133262	0.0128393		Cellular senescence	hsa04218	0.00408204	0.0383185
Longevity regulating pathway	hsa04211	0.00134707	0.0128393		Glycolysis / Gluconeogenesis	hsa00010	0.00487356	0.0431673
RNA degradation	hsa03018	0.00157701	0.0141744		Carbon metabolism	hsa01200	0.00489526	0.0431673
Pancreatic cancer	hsa05212	0.0015801	0.0141744		Fructose and mannose metabolism	hsa00051	0.00561025	0.0480172
AMPK signaling pathway	hsa04152	0.00165856	0.0144532		Biosynthesis of unsaturated fatty acids	hsa01040	0.00684441	0.0550468
Human papillomavirus infection	hsa05165	0.00170685	0.0144608		Regulation of actin cytoskeleton	hsa04810	0.0070937	0.0550468
Adherens junction	hsa04520	0.00185363	0.0152799		Hepatocellular carcinoma	hsa05225	0.00712048	0.0550468
Non-small cell lung cancer	hsa05223	0.00216186	0.0173518		Drug metabolism - cytochrome P450	hsa00982	0.00719705	0.0550468
Thyroid hormone signaling pathway	hsa04919	0.00239137	0.0187017		mTOR signaling pathway	hsa04150	0.0073774	0.0550468
Aminoacyl-tRNA biosynthesis	hsa00970	0.00247203	0.0188493		Phagosome	hsa04145	0.00837338	0.0609163
Colorectal cancer	hsa05210	0.00253685	0.0188717		Gastric cancer	hsa05226	0.00901397	0.0639772
Pathways in cancer	hsa05200	0.0028504	0.0203559		Synaptic vesicle cycle	hsa04721	0.00988698	0.0685027
Citrate cycle (TCA cycle)	hsa00020	0.00286985	0.0203559		Vibrio cholerae infection	hsa05110	0.0103051	0.069486
Platinum drug resistance	hsa01524	0.00298156	0.0206676		Thyroid cancer	hsa05216	0.0105065	0.069486
Kaposi's sarcoma-associated herpesvirus infection	hsa05167	0.00312909	0.0212083		FoxO signaling pathway	hsa04068	0.0111904	0.0723649
Choline metabolism in cancer	hsa05231	0.00371851	0.0246553		Proximal tubule bicarbonate reclamation	hsa04964	0.012622	0.0798476
Carbon metabolism	hsa01200	0.003978	0.0258147		Proteoglycans in cancer	hsa05205	0.0128975	0.0798546
Sphingolipid signaling pathway	hsa04071	0.00473653	0.0300967		Pentose and glucuronate interconversions	hsa00040	0.0144645	0.0876912
HIF-1 signaling pathway	hsa04066	0.00484417	0.0301525		Porphyrin and chlorophyll metabolism	hsa00860	0.0151914	0.0902182
Endocrine resistance	hsa01522	0.00514553	0.0313036		Pentose phosphate pathway	hsa00030	0.0179896	0.104699
Steroid biosynthesis	hsa00100	0.00523438	0.0313036		Alanine, aspartate and glutamate metabolism	hsa00250	0.0220319	0.125712
Viral carcinogenesis	hsa05203	0.00594519	0.0348708		PI3K-Akt signaling pathway	hsa04151	0.0233177	0.130489
Ferroptosis	hsa04216	0.00755899	0.0434999		NOD-like receptor signaling pathway	hsa04621	0.0244999	0.134519
Fc gamma R-mediated phagocytosis	hsa04666	0.00867762	0.0490125		Hippo signaling pathway - multiple species	hsa04392	0.0267656	0.144237
N-Glycan biosynthesis	hsa00510	0.00931783	0.0508835		Melanoma	hsa05218	0.0293018	0.155033
Biosynthesis of amino acids	hsa01230	0.0094194	0.0508835		Osteoclast differentiation	hsa04380	0.0300493	0.156149
Glucagon signaling pathway	hsa04922	0.00950938	0.0508835		Galactose metabolism	hsa00052	0.032088	0.160993
Acute myeloid leukemia	hsa05221	0.00989915	0.0520559		beta-Alanine metabolism	hsa00410	0.032088	0.160993
EGFR tyrosine kinase inhibitor resistance	hsa01521	0.010929	0.0564975		Cytokine-cytokine receptor interaction	hsa04060	0.0341092	0.168233
Hepatocellular carcinoma	hsa05225	0.0124713	0.0633053		EGFR tyrosine kinase inhibitor resistance	hsa01521	0.0359222	0.174223
Thyroid cancer	hsa05216	0.0126611	0.0633053		Ascorbate and aldarate metabolism	hsa00053	0.0384538	0.181441
Herpes simplex infection	hsa05168	0.0135425	0.0666204		Thyroid hormone signaling pathway	hsa04919	0.0386575	0.181441
Endometrial cancer	hsa05213	0.0138381	0.0669516		HIF-1 signaling pathway	hsa04066	0.0412747	0.18857
Other glycan degradation	hsa00511	0.0140489	0.0669516		Pyruvate metabolism	hsa00620	0.0416987	0.18857
Proteoglycans in cancer	hsa05205	0.0147642	0.0680961		Hippo signaling pathway	hsa04390	0.0421205	0.18857
Fructose and mannose metabolism	hsa00051	0.0148432	0.0680961		Cholesterol metabolism	hsa04979	0.0438203	0.193207
Fatty acid metabolism	hsa01212	0.0149588	0.0680961		Apoptosis - multiple species	hsa04215	0.044748	0.193926
Fluid shear stress and atherosclerosis	hsa05418	0.0168734	0.0756822		AMPK signaling pathway	hsa04152	0.0453161	0.193926
Notch signaling pathway	hsa04330	0.0177255	0.0779872		Breast cancer	hsa05224	0.0461797	0.194758
Glioma	hsa05214	0.0178987	0.0779872		Prion diseases	hsa05020	0.0470697	0.195676
VEGF signaling pathway	hsa04370	0.0183988	0.079037		Tight junction	hsa04530	0.0488344	0.200152
FoxO signaling pathway	hsa04068	0.0237067	0.100424		Valine, leucine and isoleucine degradation	hsa00280	0.0561316	0.224653
Estrogen signaling pathway	hsa04915	0.0247692	0.103488		Retinol metabolism	hsa00830	0.0563563	0.224653
Base excision repair	hsa03410	0.025398	0.104681		Tyrosine metabolism	hsa00350	0.0602328	0.234515
Spliceosome	hsa03040	0.0286861	0.116657		Renal cell carcinoma	hsa05211	0.060442	0.234515
TGF-beta signaling pathway	hsa04350	0.0339303	0.136168		Arginine and proline metabolism	hsa00330	0.0630491	0.241412
Hepatitis C	hsa05160	0.0346161	0.13629		Glioma	hsa05214	0.0662905	0.248214
Glycolysis / Gluconeogenesis	hsa00010	0.0348544	0.13629		Focal adhesion	hsa04510	0.0665315	0.248214
Valine, leucine and isoleucine degradation	hsa00280	0.0365212	0.141		Melanogenesis	hsa04916	0.0698854	0.257426
Amino sugar and nucleotide sugar metabolism	hsa00520	0.0405744	0.15469		Amoebiasis	hsa05146	0.0729546	0.265372
Progesterone-mediated oocyte maturation	hsa04914	0.0482313	0.179474		Prostate cancer	hsa05215	0.0753875	0.270836
Lysine degradation	hsa00310	0.0486002	0.179474		Legionellosis	hsa05134	0.0784446	0.278383
Alanine, aspartate and glutamate metabolism	hsa00250	0.0488404	0.179474		Histidine metabolism	hsa00340	0.0825175	0.289308
Regulation of actin cytoskeleton	hsa04810	0.0499313	0.181298		Bile secretion	hsa04976	0.0846618	0.293293
Tight junction	hsa04530	0.0543103	0.194878		Apelin signaling pathway	hsa04371	0.0862591	0.29531
Pyrimidine metabolism	hsa00240	0.0582622	0.206628		Small cell lung cancer	hsa05222	0.091648	0.310111
Sphingolipid metabolism	hsa00600	0.0632108	0.220751		IL-17 signaling pathway	hsa04657	0.096238	0.321899
B cell receptor signaling pathway	hsa04662	0.0636921	0.220751		Fatty acid degradation	hsa00071	0.0984346	0.325505
Arginine and proline metabolism	hsa00330	0.0745117	0.255349		Cell cycle	hsa04110	0.102825	0.33469
NOD-like receptor signaling pathway	hsa04621	0.0851536	0.288576		Gap junction	hsa04540	0.10364	0.33469
Influenza A	hsa05164	0.0884959	0.296607		Phenylalanine metabolism	hsa00360	0.104698	0.33469
RNA polymerase	hsa03020	0.0895637	0.296923		Arrhythmogenic right ventricular cardiomyopathy (ARVC)	hsa05412	0.105812	0.33469
Oocyte meiosis	hsa04114	0.0925054	0.303378		Fatty acid elongation	hsa00062	0.111526	0.342101
Epithelial cell signaling in Helicobacter pylori infection	hsa05120	0.0968453	0.311053		Antigen processing and presentation	hsa04612	0.111682	0.342101
Fatty acid elongation	hsa00062	0.0968855	0.311053		Ovarian steroidogenesis	hsa04913	0.111682	0.342101
Glycerophospholipid metabolism	hsa00564	0.0979053	0.311053		AGE-RAGE signaling pathway in diabetic complications	hsa04933	0.120837	0.357573
Phosphatidylinositol signaling system	hsa04070	0.112725	0.354444		Phospholipase D signaling pathway	hsa04072	0.121889	0.357573
Pyruvate metabolism	hsa00620	0.116451	0.358966		Apoptosis	hsa04210	0.121889	0.357573
Amoebiasis	hsa05146	0.116517	0.358966		Jak-STAT signaling pathway	hsa04630	0.121889	0.357573
Prolactin signaling pathway	hsa04917	0.118001	0.359903		Hematopoietic cell lineage	hsa04640	0.123724	0.357573
Salmonella infection	hsa05132	0.12456	0.375001		Malaria	hsa05144	0.124106	0.357573
Signaling pathways regulating pluripotency of stem cells	hsa04550	0.125881	0.375001		Chagas disease (American trypanosomiasis)	hsa05142	0.136549	0.389566
Selenocompound metabolism	hsa00450	0.12664	0.375001		Aldosterone-regulated sodium reabsorption	hsa04960	0.14183	0.400703
Osteoclast differentiation	hsa04380	0.134202	0.393573		Leishmaniasis	hsa05140	0.148646	0.415922
Cysteine and methionine metabolism	hsa00270	0.141105	0.408704		Platinum drug resistance	hsa01524	0.15166	0.420314
mRNA surveillance pathway	hsa03015	0.142041	0.408704		Dilated cardiomyopathy (DCM)	hsa05414	0.154553	0.424291
2-Oxocarboxylic acid metabolism	hsa01210	0.143957	0.410344		Insulin signaling pathway	hsa04910	0.159094	0.430608
Vibrio cholerae infection	hsa05110	0.163608	0.454579		Adipocytokine signaling pathway	hsa04920	0.160643	0.430608
Legionellosis	hsa05134	0.163608	0.454579		Oocyte meiosis	hsa04114	0.16199	0.430608
Melanoma	hsa05218	0.164024	0.454579		Mucin type O-glycan biosynthesis	hsa00512	0.162773	0.430608
Breast cancer	hsa05224	0.165437	0.454579		Arginine biosynthesis	hsa00220	0.165321	0.433408
Butanoate metabolism	hsa00650	0.174553	0.475344		Signaling pathways regulating pluripotency of stem cells	hsa04550	0.16897	0.439021
Nucleotide excision repair	hsa03420	0.183475	0.484234		RIG-I-like receptor signaling pathway	hsa04622	0.173089	0.441832
Toxoplasmosis	hsa05145	0.183614	0.484234		Basal cell carcinoma	hsa05217	0.173089	0.441832
Toll-like receptor signaling pathway	hsa04620	0.183902	0.484234		Biosynthesis of amino acids	hsa01230	0.174654	0.441951
Longevity regulating pathway - multiple species	hsa04213	0.184168	0.484234		Citrate cycle (TCA cycle)	hsa00020	0.181643	0.44795
Prion diseases	hsa05020	0.18813	0.490369		Circadian rhythm	hsa04710	0.181643	0.44795
Cytosolic DNA-sensing pathway	hsa04623	0.191324	0.490369		Fat digestion and absorption	hsa04975	0.181643	0.44795
Amyotrophic lateral sclerosis (ALS)	hsa05014	0.191324	0.490369		PPAR signaling pathway	hsa03320	0.185964	0.452614
Sulfur metabolism	hsa00920	0.195512	0.493533		Hypertrophic cardiomyopathy (HCM)	hsa05410	0.186645	0.452614
Adipocytokine signaling pathway	hsa04920	0.196907	0.493533		Longevity regulating pathway - multiple species	hsa04213	0.198257	0.476799
DNA replication	hsa03030	0.197413	0.493533		Drug metabolism - other enzymes	hsa00983	0.208242	0.496709
Fc epsilon RI signaling pathway	hsa04664	0.20895	0.509035		Butanoate metabolism	hsa00650	0.211214	0.499702
Measles	hsa05162	0.21159	0.509035		Pathogenic Escherichia coli infection	hsa05130	0.212966	0.499784
Galactose metabolism	hsa00052	0.212479	0.509035		Nitrogen metabolism	hsa00910	0.218176	0.503884
Antifolate resistance	hsa01523	0.212479	0.509035		Renin-angiotensin system	hsa04614	0.218176	0.503884
Synaptic vesicle cycle	hsa04721	0.21321	0.509035		Choline metabolism in cancer	hsa05231	0.228452	0.522241
Fatty acid degradation	hsa00071	0.215297	0.509035		Fc gamma R-mediated phagocytosis	hsa04666	0.231966	0.522241
Antigen processing and presentation	hsa04612	0.215297	0.509035		Wnt signaling pathway	hsa04310	0.233304	0.522241
Non-homologous end-joining	hsa03450	0.221703	0.517885		Hepatitis B	hsa05161	0.233304	0.522241
Type II diabetes mellitus	hsa04930	0.223625	0.517885		Thyroid hormone synthesis	hsa04918	0.241302	0.536021
Phospholipase D signaling pathway	hsa04072	0.224134	0.517885		Cytosolic DNA-sensing pathway	hsa04623	0.244958	0.540021
NF-kappa B signaling pathway	hsa04064	0.227862	0.519737		Type I diabetes mellitus	hsa04940	0.248398	0.543487
Terpenoid backbone biosynthesis	hsa00900	0.228382	0.519737		TNF signaling pathway	hsa04668	0.251737	0.546683
Inositol phosphate metabolism	hsa00562	0.231177	0.519737		Autophagy - animal	hsa04140	0.258734	0.556625
Transcriptional misregulation in cancer	hsa05202	0.231785	0.519737		Folate biosynthesis	hsa00790	0.260141	0.556625
Apoptosis - multiple species	hsa04215	0.233751	0.519737		Necroptosis	hsa04217	0.288597	0.613006
Gastric cancer	hsa05226	0.236839	0.519737		Peroxisome	hsa04146	0.29479	0.61715
Chagas disease (American trypanosomiasis)	hsa05142	0.236864	0.519737		Salmonella infection	hsa05132	0.29479	0.61715
Long-term potentiation	hsa04720	0.239072	0.520836		Endocrine and other factor-regulated calcium reabsorption	hsa04961	0.302995	0.629796
Protein export	hsa03060	0.242142	0.523351		Glyoxylate and dicarboxylate metabolism	hsa00630	0.310949	0.641746
Glycosphingolipid biosynthesis - globo and isoglobo series	hsa00603	0.243658	0.523351		Cardiac muscle contraction	hsa04260	0.317156	0.645401
AGE-RAGE signaling pathway in diabetic complications	hsa04933	0.249719	0.532617		Gastric acid secretion	hsa04971	0.317156	0.645401
Glyoxylate and dicarboxylate metabolism	hsa00630	0.254716	0.539354		Chronic myeloid leukemia	hsa05220	0.324177	0.655108
Shigellosis	hsa05131	0.256414	0.539354		Ras signaling pathway	hsa04014	0.326872	0.655998
Th17 cell differentiation	hsa04659	0.260618	0.544441		Cell adhesion molecules (CAMs)	hsa04514	0.330145	0.658029
Vasopressin-regulated water reabsorption	hsa04962	0.269383	0.555503		Complement and coagulation cascades	hsa04610	0.342279	0.677573
T cell receptor signaling pathway	hsa04660	0.269556	0.555503		Adherens junction	hsa04520	0.348849	0.685912
Tuberculosis	hsa05152	0.272166	0.557118		Arachidonic acid metabolism	hsa00590	0.352317	0.686267
Circadian rhythm	hsa04710	0.276958	0.562492		Longevity regulating pathway	hsa04211	0.354133	0.686267
One carbon pool by folate	hsa00670	0.278807	0.562492		Glycerophospholipid metabolism	hsa00564	0.358463	0.686267
MicroRNAs in cancer	hsa05206	0.280448	0.562492		Estrogen signaling pathway	hsa04915	0.358463	0.686267
Bacterial invasion of epithelial cells	hsa05100	0.282168	0.562492		Amino sugar and nucleotide sugar metabolism	hsa00520	0.363194	0.689457
Glycosaminoglycan biosynthesis - chondroitin sulfate / dermatan sulfate	hsa00532	0.293244	0.580776		Colorectal cancer	hsa05210	0.364867	0.689457
Relaxin signaling pathway	hsa04926	0.298026	0.586438		NF-kappa B signaling pathway	hsa04064	0.369263	0.693261
Biosynthesis of unsaturated fatty acids	hsa01040	0.306135	0.594721		Salivary secretion	hsa04970	0.380963	0.710642
Mismatch repair	hsa03430	0.306135	0.594721		MAPK signaling pathway	hsa04010	0.390953	0.724632
Fanconi anemia pathway	hsa03460	0.311019	0.59721		Pertussis	hsa05133	0.393763	0.725222
Hippo signaling pathway	hsa04390	0.311333	0.59721		Viral carcinogenesis	hsa05203	0.398572	0.729461
Fatty acid biosynthesis	hsa00061	0.326347	0.616676		Toxoplasmosis	hsa05145	0.40176	0.730702
RNA transport	hsa03013	0.327546	0.616676		Endometrial cancer	hsa05213	0.40795	0.737351
Axon guidance	hsa04360	0.327546	0.616676		Starch and sucrose metabolism	hsa00500	0.414032	0.743724
Ribosome biogenesis in eukaryotes	hsa03008	0.333998	0.624966		Fatty acid biosynthesis	hsa00061	0.420706	0.751076
Focal adhesion	hsa04510	0.337347	0.627384		Proteasome	hsa03050	0.442423	0.778457
IL-17 signaling pathway	hsa04657	0.342282	0.628892		Type II diabetes mellitus	hsa04930	0.442423	0.778457
GnRH signaling pathway	hsa04912	0.342282	0.628892		Amyotrophic lateral sclerosis (ALS)	hsa05014	0.444068	0.778457
Propanoate metabolism	hsa00640	0.346921	0.633598		cAMP signaling pathway	hsa04024	0.46192	0.795175
Autophagy - other	hsa04136	0.355185	0.644232		Phototransduction	hsa04744	0.463499	0.795175
Long-term depression	hsa04730	0.35908	0.644232		Vasopressin-regulated water reabsorption	hsa04962	0.46452	0.795175
Pathogenic Escherichia coli infection	hsa05130	0.35908	0.644232		Propanoate metabolism	hsa00640	0.464535	0.795175
Phagosome	hsa04145	0.365436	0.651801		Acute myeloid leukemia	hsa05221	0.481568	0.813812
PI3K-Akt signaling pathway	hsa04151	0.37195	0.659563		Cysteine and methionine metabolism	hsa00270	0.486348	0.813812
Porphyrin and chlorophyll metabolism	hsa00860	0.389327	0.683139		Sphingolipid metabolism	hsa00600	0.486348	0.813812
MAPK signaling pathway	hsa04010	0.389725	0.683139		Alzheimer's disease	hsa05010	0.486669	0.813812
Lysosome	hsa04142	0.402327	0.701199		Other glycan degradation	hsa00511	0.496462	0.813812
Th1 and Th2 cell differentiation	hsa04658	0.405215	0.702219		Glycosphingolipid biosynthesis - globo and isoglobo series	hsa00603	0.496462	0.813812
Glycerolipid metabolism	hsa00561	0.415152	0.715375		Glycosphingolipid biosynthesis - ganglio series	hsa00604	0.496462	0.813812
RIG-I-like receptor signaling pathway	hsa04622	0.424016	0.726544		Transcriptional misregulation in cancer	hsa05202	0.497796	0.813812
Rheumatoid arthritis	hsa05323	0.432214	0.73364		Insulin resistance	hsa04931	0.502713	0.817259
Natural killer cell mediated cytotoxicity	hsa04650	0.432968	0.73364		Inflammatory bowel disease (IBD)	hsa05321	0.528989	0.845165
Glycosaminoglycan degradation	hsa00531	0.446092	0.751702		GABAergic synapse	hsa04727	0.529571	0.845165
Rap1 signaling pathway	hsa04015	0.45227	0.757925		Mitophagy - animal	hsa04137	0.535092	0.845165
Glutathione metabolism	hsa00480	0.460418	0.767363		Circadian entrainment	hsa04713	0.53528	0.845165
Gap junction	hsa04540	0.465978	0.77241		Relaxin signaling pathway	hsa04926	0.536153	0.845165
Basal cell carcinoma	hsa05217	0.482028	0.789768		Tuberculosis	hsa05152	0.537304	0.845165
Starch and sucrose metabolism	hsa00500	0.484218	0.789768		Nicotinate and nicotinamide metabolism	hsa00760	0.548173	0.857625
Nicotinate and nicotinamide metabolism	hsa00760	0.484218	0.789768		Chemokine signaling pathway	hsa04062	0.560201	0.869823
Leukocyte transendothelial migration	hsa04670	0.494215	0.801785		Pancreatic cancer	hsa05212	0.561947	0.869823
SNARE interactions in vesicular transport	hsa04130	0.497118	0.802228		Calcium signaling pathway	hsa04020	0.567277	0.873426
Peroxisome	hsa04146	0.504705	0.810184		Toll-like receptor signaling pathway	hsa04620	0.570487	0.873745
Regulation of lipolysis in adipocytes	hsa04923	0.514271	0.821218		Oxidative phosphorylation	hsa00190	0.586327	0.893305
Arginine biosynthesis	hsa00220	0.551568	0.866367		2-Oxocarboxylic acid metabolism	hsa01210	0.597505	0.904075
Mannose type O-glycan biosynthesis	hsa00515	0.551568	0.866367		Antifolate resistance	hsa01523	0.600049	0.904075
Glycosylphosphatidylinositol (GPI)-anchor biosynthesis	hsa00563	0.553907	0.866367		B cell receptor signaling pathway	hsa04662	0.602717	0.904075
Collecting duct acid secretion	hsa04966	0.553907	0.866367		Lysine degradation	hsa00310	0.613951	0.913912
Aldosterone-regulated sodium reabsorption	hsa04960	0.566215	0.8811		Epstein-Barr virus infection	hsa05169	0.615556	0.913912
Leishmaniasis	hsa05140	0.581217	0.897614		cGMP-PKG signaling pathway	hsa04022	0.621223	0.917645
Amphetamine addiction	hsa05031	0.582713	0.897614		Endocrine resistance	hsa01522	0.628216	0.918106
Necroptosis	hsa04217	0.597221	0.915339		GnRH signaling pathway	hsa04912	0.628216	0.918106
Apelin signaling pathway	hsa04371	0.623968	0.939675		Prolactin signaling pathway	hsa04917	0.631001	0.918106
Glycine, serine and threonine metabolism	hsa00260	0.631519	0.939675		Autophagy - other	hsa04136	0.670185	0.96648
Basal transcription factors	hsa03022	0.631594	0.939675		Glycosaminoglycan biosynthesis - heparan sulfate / heparin	hsa00534	0.682543	0.96648
Cocaine addiction	hsa05030	0.631751	0.939675		ABC transporters	hsa02010	0.684094	0.96648
beta-Alanine metabolism	hsa00410	0.631949	0.939675		Oxytocin signaling pathway	hsa04921	0.691908	0.96648
Hippo signaling pathway - multiple species	hsa04392	0.632386	0.939675		Th17 cell differentiation	hsa04659	0.693532	0.96648
Vitamin digestion and absorption	hsa04977	0.636677	0.939675		Aldosterone synthesis and secretion	hsa04925	0.693585	0.96648
Pertussis	hsa05133	0.637747	0.939675		Long-term potentiation	hsa04720	0.694613	0.96648
Melanogenesis	hsa04916	0.645648	0.946743		Non-small cell lung cancer	hsa05223	0.694613	0.96648
Jak-STAT signaling pathway	hsa04630	0.659434	0.962332		Glucagon signaling pathway	hsa04922	0.706406	0.96648
Cholesterol metabolism	hsa04979	0.687113	0.985762		ErbB signaling pathway	hsa04012	0.706484	0.96648
Mineral absorption	hsa04978	0.689066	0.985762		Leukocyte transendothelial migration	hsa04670	0.706879	0.96648
Wnt signaling pathway	hsa04310	0.690267	0.985762		Other types of O-glycan biosynthesis	hsa00514	0.707423	0.96648
Homologous recombination	hsa03440	0.690268	0.985762		Vitamin digestion and absorption	hsa04977	0.707423	0.96648
Viral myocarditis	hsa05416	0.691649	0.985762		Ubiquinone and other terpenoid-quinone biosynthesis	hsa00130	0.718164	0.968174
Purine metabolism	hsa00230	0.697275	0.987254		Graft-versus-host disease	hsa05332	0.718164	0.968174
Pentose phosphate pathway	hsa00030	0.702407	0.987254		Neurotrophin signaling pathway	hsa04722	0.718645	0.968174
Mucin type O-glycan biosynthesis	hsa00512	0.702407	0.987254		Shigellosis	hsa05131	0.723536	0.970272
cGMP-PKG signaling pathway	hsa04022	0.723012	1		TGF-beta signaling pathway	hsa04350	0.733595	0.974614
PPAR signaling pathway	hsa03320	0.728048	1		Notch signaling pathway	hsa04330	0.736052	0.974614
Ras signaling pathway	hsa04014	0.732967	1		Adrenergic signaling in cardiomyocytes	hsa04261	0.73955	0.974614
Glycosphingolipid biosynthesis - ganglio series	hsa00604	0.733876	1		Vascular smooth muscle contraction	hsa04270	0.740171	0.974614
Hedgehog signaling pathway	hsa04340	0.738926	1		Carbohydrate digestion and absorption	hsa04973	0.749042	0.976027
Retrograde endocannabinoid signaling	hsa04723	0.751209	1		Lysosome	hsa04142	0.749736	0.976027
ECM-receptor interaction	hsa04512	0.760645	1		Regulation of lipolysis in adipocytes	hsa04923	0.751867	0.976027
Glycosaminoglycan biosynthesis - heparan sulfate / heparin	hsa00534	0.787158	1		Progesterone-mediated oocyte maturation	hsa04914	0.75466	0.976027
Proximal tubule bicarbonate reclamation	hsa04964	0.787158	1		Renin secretion	hsa04924	0.770552	0.986337
Glycosaminoglycan biosynthesis - keratan sulfate	hsa00533	0.817694	1		RNA degradation	hsa03018	0.775498	0.986337
Nitrogen metabolism	hsa00910	0.817694	1		Primary bile acid biosynthesis	hsa00120	0.776189	0.986337
Folate biosynthesis	hsa00790	0.82679	1		Glycosaminoglycan biosynthesis - keratan sulfate	hsa00533	0.776189	0.986337
Metabolism of xenobiotics by cytochrome P450	hsa00980	0.830461	1		Glycine, serine and threonine metabolism	hsa00260	0.782423	0.989935
Aldosterone synthesis and secretion	hsa04925	0.831472	1		Inflammatory mediator regulation of TRP channels	hsa04750	0.796986	0.999842
Inflammatory mediator regulation of TRP channels	hsa04750	0.845147	1		Ether lipid metabolism	hsa00565	0.79769	0.999842
Chemical carcinogenesis	hsa05204	0.854795	1		Thiamine metabolism	hsa00730	0.800561	0.999842
Dopaminergic synapse	hsa04728	0.855348	1		Th1 and Th2 cell differentiation	hsa04658	0.819779	0.999989
Platelet activation	hsa04611	0.857185	1		Intestinal immune network for IgA production	hsa04672	0.824469	0.999989
Pentose and glucuronate interconversions	hsa00040	0.861556	1		Nicotine addiction	hsa05033	0.824469	0.999989
Drug metabolism - other enzymes	hsa00983	0.869929	1		Phosphatidylinositol signaling system	hsa04070	0.824971	0.999989
Chemokine signaling pathway	hsa04062	0.880002	1		Amphetamine addiction	hsa05031	0.829575	0.999989
ABC transporters	hsa02010	0.897328	1		Bacterial invasion of epithelial cells	hsa05100	0.8297	0.999989
Ubiquinone and other terpenoid-quinone biosynthesis	hsa00130	0.903919	1		Glutamatergic synapse	hsa04724	0.836538	0.999989
cAMP signaling pathway	hsa04024	0.904573	1		Axon guidance	hsa04360	0.839863	0.999989
Cardiac muscle contraction	hsa04260	0.9062	1		Selenocompound metabolism	hsa00450	0.841641	0.999989
Ether lipid metabolism	hsa00565	0.909839	1		Long-term depression	hsa04730	0.862957	0.999989
Carbohydrate digestion and absorption	hsa04973	0.919447	1		Endocytosis	hsa04144	0.871136	0.999989
Other types of O-glycan biosynthesis	hsa00514	0.925627	1		Platelet activation	hsa04611	0.879055	0.999989
Pancreatic secretion	hsa04972	0.925799	1		Insulin secretion	hsa04911	0.890856	0.999989
Arrhythmogenic right ventricular cardiomyopathy (ARVC)	hsa05412	0.927797	1		alpha-Linolenic acid metabolism	hsa00592	0.900184	0.999989
Glycosphingolipid biosynthesis - lacto and neolacto series	hsa00601	0.936097	1		Protein processing in endoplasmic reticulum	hsa04141	0.92053	0.999989
Hematopoietic cell lineage	hsa04640	0.942344	1		Mismatch repair	hsa03430	0.920764	0.999989
alpha-Linolenic acid metabolism	hsa00592	0.943051	1		Pancreatic secretion	hsa04972	0.927266	0.999989
Pantothenate and CoA biosynthesis	hsa00770	0.943051	1		Protein export	hsa03060	0.929405	0.999989
Cholinergic synapse	hsa04725	0.947982	1		Non-alcoholic fatty liver disease (NAFLD)	hsa04932	0.932422	0.999989
Oxytocin signaling pathway	hsa04921	0.948584	1		Viral myocarditis	hsa05416	0.935775	0.999989
Renin-angiotensin system	hsa04614	0.952723	1		Linoleic acid metabolism	hsa00591	0.937105	0.999989
Ascorbate and aldarate metabolism	hsa00053	0.954591	1		Glycosphingolipid biosynthesis - lacto and neolacto series	hsa00601	0.937105	0.999989
Endocrine and other factor-regulated calcium reabsorption	hsa04961	0.957141	1		African trypanosomiasis	hsa05143	0.95008	0.999989
Thyroid hormone synthesis	hsa04918	0.959549	1		Inositol phosphate metabolism	hsa00562	0.951182	0.999989
Tryptophan metabolism	hsa00380	0.963034	1		Olfactory transduction	hsa04740	0.955787	0.999989
Ovarian steroidogenesis	hsa04913	0.963034	1		Ubiquitin mediated proteolysis	hsa04120	0.9583	0.999989
Vascular smooth muscle contraction	hsa04270	0.964724	1		VEGF signaling pathway	hsa04370	0.959353	0.999989
Adrenergic signaling in cardiomyocytes	hsa04261	0.967765	1		Hedgehog signaling pathway	hsa04340	0.960168	0.999989
Maturity onset diabetes of the young	hsa04950	0.970194	1		Staphylococcus aureus infection	hsa05150	0.960382	0.999989
Primary bile acid biosynthesis	hsa00120	0.977621	1		Huntington's disease	hsa05016	0.966927	0.999989
Insulin secretion	hsa04911	0.980593	1		Morphine addiction	hsa05032	0.967078	0.999989
Histidine metabolism	hsa00340	0.980942	1		Primary immunodeficiency	hsa05340	0.968561	0.999989
Renin secretion	hsa04924	0.98398	1		Sphingolipid signaling pathway	hsa04071	0.971391	0.999989
Bile secretion	hsa04976	0.98398	1		Natural killer cell mediated cytotoxicity	hsa04650	0.971669	0.999989
Retinol metabolism	hsa00830	0.984699	1		Fc epsilon RI signaling pathway	hsa04664	0.973693	0.999989
Intestinal immune network for IgA production	hsa04672	0.98479	1		mRNA surveillance pathway	hsa03015	0.979775	0.999989
Drug metabolism - cytochrome P450	hsa00982	0.987883	1		Dopaminergic synapse	hsa04728	0.981085	0.999989
Malaria	hsa05144	0.989396	1		DNA replication	hsa03030	0.982369	0.999989
Fat digestion and absorption	hsa04975	0.990114	1		Pyrimidine metabolism	hsa00240	0.984709	0.999989
Taurine and hypotaurine metabolism	hsa00430	0.991527	1		Purine metabolism	hsa00230	0.985576	0.999989
Alcoholism	hsa05034	0.991938	1		Taste transduction	hsa04742	0.987801	0.999989
Primary immunodeficiency	hsa05340	0.993649	1		Homologous recombination	hsa03440	0.988904	0.999989
Glutamatergic synapse	hsa04724	0.994077	1		Nucleotide excision repair	hsa03420	0.992162	0.999989
Circadian entrainment	hsa04713	0.994982	1		Ribosome biogenesis in eukaryotes	hsa03008	0.9926	0.999989
Thiamine metabolism	hsa00730	0.995213	1		T cell receptor signaling pathway	hsa04660	0.99328	0.999989
Phenylalanine metabolism	hsa00360	0.99545	1		Systemic lupus erythematosus	hsa05322	0.99328	0.999989
Inflammatory bowel disease (IBD)	hsa05321	0.996047	1		Neuroactive ligand-receptor interaction	hsa04080	0.993698	0.999989
Gastric acid secretion	hsa04971	0.996115	1		Cocaine addiction	hsa05030	0.993783	0.999989
Arachidonic acid metabolism	hsa00590	0.99631	1		N-Glycan biosynthesis	hsa00510	0.99561	0.999989
Complement and coagulation cascades	hsa04610	0.99692	1		Cholinergic synapse	hsa04725	0.995665	0.999989
Type I diabetes mellitus	hsa04940	0.997347	1		Parkinson's disease	hsa05012	0.997218	0.999989
Nicotine addiction	hsa05033	0.997383	1		Fanconi anemia pathway	hsa03460	0.997542	0.999989
African trypanosomiasis	hsa05143	0.99746	1		RNA transport	hsa03013	0.998947	0.999989
Salivary secretion	hsa04970	0.997519	1		Alcoholism	hsa05034	0.999176	0.999989
Steroid hormone biosynthesis	hsa00140	0.997885	1		Ribosome	hsa03010	0.999698	0.999989
Tyrosine metabolism	hsa00350	0.998417	1		Retrograde endocannabinoid signaling	hsa04723	0.99975	0.999989
Linoleic acid metabolism	hsa00591	0.998509	1		Serotonergic synapse	hsa04726	0.999848	0.999989
Protein digestion and absorption	hsa04974	0.998582	1		Spliceosome	hsa03040	0.999989	0.999989
Morphine addiction	hsa05032	0.998615	1
Hypertrophic cardiomyopathy (HCM)	hsa05410	0.998728	1
Calcium signaling pathway	hsa04020	0.998869	1
GABAergic synapse	hsa04727	0.999031	1
Serotonergic synapse	hsa04726	0.999107	1
Cell adhesion molecules (CAMs)	hsa04514	0.999242	1
Dilated cardiomyopathy (DCM)	hsa05414	0.999543	1
Phototransduction	hsa04744	0.999768	1
Staphylococcus aureus infection	hsa05150	0.999848	1
Systemic lupus erythematosus	hsa05322	0.999999	1
Cytokine-cytokine receptor interaction	hsa04060	1	1
Taste transduction	hsa04742	1	1
Olfactory transduction	hsa04740	1	1
Neuroactive ligand-receptor interaction	hsa04080	1	1

## Sheet: Sheet2
Table S6b. KEGG pathway enrichment of DEGs in LD100 treated RWPE-1 cells, Related to Figure 2.
Description	ID	p-Value	q-Value
p53 signaling pathway	hsa04115	7.74704e-07	0.000225439
Central carbon metabolism in cancer	hsa05230	2.46733e-06	0.00033984
Steroid biosynthesis	hsa00100	4.16724e-06	0.00033984
Influenza A	hsa05164	4.67134e-06	0.00033984
Metabolism of xenobiotics by cytochrome P450	hsa00980	5.85391e-05	0.00289432
Steroid hormone biosynthesis	hsa00140	5.96767e-05	0.00289432
Glutathione metabolism	hsa00480	0.000142738	0.00468851
Ferroptosis	hsa04216	0.000144885	0.00468851
ECM-receptor interaction	hsa04512	0.000145005	0.00468851
MicroRNAs in cancer	hsa05206	0.000186067	0.00541456
Pathways in cancer	hsa05200	0.000310035	0.00820184
Fluid shear stress and atherosclerosis	hsa05418	0.000758145	0.018385
Glycerolipid metabolism	hsa00561	0.000962959	0.0205138
Mineral absorption	hsa04978	0.000986919	0.0205138
Fatty acid metabolism	hsa01212	0.00110406	0.0206905
Hepatitis C	hsa05160	0.00113762	0.0206905
Measles	hsa05162	0.00122431	0.0209572
Herpes simplex infection	hsa05168	0.00130425	0.0210854
Terpenoid backbone biosynthesis	hsa00900	0.00148441	0.0227349
Rheumatoid arthritis	hsa05323	0.00175945	0.0243816
Tryptophan metabolism	hsa00380	0.00175949	0.0243816
Collecting duct acid secretion	hsa04966	0.00206271	0.0264935
Chemical carcinogenesis	hsa05204	0.00209398	0.0264935
Human papillomavirus infection	hsa05165	0.00233572	0.0280151
Epithelial cell signaling in Helicobacter pylori infection	hsa05120	0.00247973	0.0280151
Rap1 signaling pathway	hsa04015	0.00250306	0.0280151
Protein digestion and absorption	hsa04974	0.00269728	0.0290707
Bladder cancer	hsa05219	0.00341348	0.0354758
Kaposi's sarcoma-associated herpesvirus infection	hsa05167	0.00363877	0.0365132
HTLV-I infection	hsa05166	0.00389255	0.0377577
Cellular senescence	hsa04218	0.00408204	0.0383185
Glycolysis / Gluconeogenesis	hsa00010	0.00487356	0.0431673
Carbon metabolism	hsa01200	0.00489526	0.0431673
Fructose and mannose metabolism	hsa00051	0.00561025	0.0480172
Biosynthesis of unsaturated fatty acids	hsa01040	0.00684441	0.0550468
Regulation of actin cytoskeleton	hsa04810	0.0070937	0.0550468
Hepatocellular carcinoma	hsa05225	0.00712048	0.0550468
Drug metabolism - cytochrome P450	hsa00982	0.00719705	0.0550468
mTOR signaling pathway	hsa04150	0.0073774	0.0550468
Phagosome	hsa04145	0.00837338	0.0609163
Gastric cancer	hsa05226	0.00901397	0.0639772
Synaptic vesicle cycle	hsa04721	0.00988698	0.0685027
Vibrio cholerae infection	hsa05110	0.0103051	0.069486
Thyroid cancer	hsa05216	0.0105065	0.069486
FoxO signaling pathway	hsa04068	0.0111904	0.0723649
Proximal tubule bicarbonate reclamation	hsa04964	0.012622	0.0798476
Proteoglycans in cancer	hsa05205	0.0128975	0.0798546
Pentose and glucuronate interconversions	hsa00040	0.0144645	0.0876912
Porphyrin and chlorophyll metabolism	hsa00860	0.0151914	0.0902182
Pentose phosphate pathway	hsa00030	0.0179896	0.104699
Alanine, aspartate and glutamate metabolism	hsa00250	0.0220319	0.125712
PI3K-Akt signaling pathway	hsa04151	0.0233177	0.130489
NOD-like receptor signaling pathway	hsa04621	0.0244999	0.134519
Hippo signaling pathway - multiple species	hsa04392	0.0267656	0.144237
Melanoma	hsa05218	0.0293018	0.155033
Osteoclast differentiation	hsa04380	0.0300493	0.156149
Galactose metabolism	hsa00052	0.032088	0.160993
beta-Alanine metabolism	hsa00410	0.032088	0.160993
Cytokine-cytokine receptor interaction	hsa04060	0.0341092	0.168233
EGFR tyrosine kinase inhibitor resistance	hsa01521	0.0359222	0.174223
Ascorbate and aldarate metabolism	hsa00053	0.0384538	0.181441
Thyroid hormone signaling pathway	hsa04919	0.0386575	0.181441
HIF-1 signaling pathway	hsa04066	0.0412747	0.18857
Pyruvate metabolism	hsa00620	0.0416987	0.18857
Hippo signaling pathway	hsa04390	0.0421205	0.18857
Cholesterol metabolism	hsa04979	0.0438203	0.193207
Apoptosis - multiple species	hsa04215	0.044748	0.193926
AMPK signaling pathway	hsa04152	0.0453161	0.193926
Breast cancer	hsa05224	0.0461797	0.194758
Prion diseases	hsa05020	0.0470697	0.195676
Tight junction	hsa04530	0.0488344	0.200152
Valine, leucine and isoleucine degradation	hsa00280	0.0561316	0.224653
Retinol metabolism	hsa00830	0.0563563	0.224653
Tyrosine metabolism	hsa00350	0.0602328	0.234515
Renal cell carcinoma	hsa05211	0.060442	0.234515
Arginine and proline metabolism	hsa00330	0.0630491	0.241412
Glioma	hsa05214	0.0662905	0.248214
Focal adhesion	hsa04510	0.0665315	0.248214
Melanogenesis	hsa04916	0.0698854	0.257426
Amoebiasis	hsa05146	0.0729546	0.265372
Prostate cancer	hsa05215	0.0753875	0.270836
Legionellosis	hsa05134	0.0784446	0.278383
Histidine metabolism	hsa00340	0.0825175	0.289308
Bile secretion	hsa04976	0.0846618	0.293293
Apelin signaling pathway	hsa04371	0.0862591	0.29531
Small cell lung cancer	hsa05222	0.091648	0.310111
IL-17 signaling pathway	hsa04657	0.096238	0.321899
Fatty acid degradation	hsa00071	0.0984346	0.325505
Cell cycle	hsa04110	0.102825	0.33469
Gap junction	hsa04540	0.10364	0.33469
Phenylalanine metabolism	hsa00360	0.104698	0.33469
Arrhythmogenic right ventricular cardiomyopathy (ARVC)	hsa05412	0.105812	0.33469
Fatty acid elongation	hsa00062	0.111526	0.342101
Antigen processing and presentation	hsa04612	0.111682	0.342101
Ovarian steroidogenesis	hsa04913	0.111682	0.342101
AGE-RAGE signaling pathway in diabetic complications	hsa04933	0.120837	0.357573
Phospholipase D signaling pathway	hsa04072	0.121889	0.357573
Apoptosis	hsa04210	0.121889	0.357573
Jak-STAT signaling pathway	hsa04630	0.121889	0.357573
Hematopoietic cell lineage	hsa04640	0.123724	0.357573
Malaria	hsa05144	0.124106	0.357573
Chagas disease (American trypanosomiasis)	hsa05142	0.136549	0.389566
Aldosterone-regulated sodium reabsorption	hsa04960	0.14183	0.400703
Leishmaniasis	hsa05140	0.148646	0.415922
Platinum drug resistance	hsa01524	0.15166	0.420314
Dilated cardiomyopathy (DCM)	hsa05414	0.154553	0.424291
Insulin signaling pathway	hsa04910	0.159094	0.430608
Adipocytokine signaling pathway	hsa04920	0.160643	0.430608
Oocyte meiosis	hsa04114	0.16199	0.430608
Mucin type O-glycan biosynthesis	hsa00512	0.162773	0.430608
Arginine biosynthesis	hsa00220	0.165321	0.433408
Signaling pathways regulating pluripotency of stem cells	hsa04550	0.16897	0.439021
RIG-I-like receptor signaling pathway	hsa04622	0.173089	0.441832
Basal cell carcinoma	hsa05217	0.173089	0.441832
Biosynthesis of amino acids	hsa01230	0.174654	0.441951
Citrate cycle (TCA cycle)	hsa00020	0.181643	0.44795
Circadian rhythm	hsa04710	0.181643	0.44795
Fat digestion and absorption	hsa04975	0.181643	0.44795
PPAR signaling pathway	hsa03320	0.185964	0.452614
Hypertrophic cardiomyopathy (HCM)	hsa05410	0.186645	0.452614
Longevity regulating pathway - multiple species	hsa04213	0.198257	0.476799
Drug metabolism - other enzymes	hsa00983	0.208242	0.496709
Butanoate metabolism	hsa00650	0.211214	0.499702
Pathogenic Escherichia coli infection	hsa05130	0.212966	0.499784
Nitrogen metabolism	hsa00910	0.218176	0.503884
Renin-angiotensin system	hsa04614	0.218176	0.503884
Choline metabolism in cancer	hsa05231	0.228452	0.522241
Fc gamma R-mediated phagocytosis	hsa04666	0.231966	0.522241
Wnt signaling pathway	hsa04310	0.233304	0.522241
Hepatitis B	hsa05161	0.233304	0.522241
Thyroid hormone synthesis	hsa04918	0.241302	0.536021
Cytosolic DNA-sensing pathway	hsa04623	0.244958	0.540021
Type I diabetes mellitus	hsa04940	0.248398	0.543487
TNF signaling pathway	hsa04668	0.251737	0.546683
Autophagy - animal	hsa04140	0.258734	0.556625
Folate biosynthesis	hsa00790	0.260141	0.556625
Necroptosis	hsa04217	0.288597	0.613006
Peroxisome	hsa04146	0.29479	0.61715
Salmonella infection	hsa05132	0.29479	0.61715
Endocrine and other factor-regulated calcium reabsorption	hsa04961	0.302995	0.629796
Glyoxylate and dicarboxylate metabolism	hsa00630	0.310949	0.641746
Cardiac muscle contraction	hsa04260	0.317156	0.645401
Gastric acid secretion	hsa04971	0.317156	0.645401
Chronic myeloid leukemia	hsa05220	0.324177	0.655108
Ras signaling pathway	hsa04014	0.326872	0.655998
Cell adhesion molecules (CAMs)	hsa04514	0.330145	0.658029
Complement and coagulation cascades	hsa04610	0.342279	0.677573
Adherens junction	hsa04520	0.348849	0.685912
Arachidonic acid metabolism	hsa00590	0.352317	0.686267
Longevity regulating pathway	hsa04211	0.354133	0.686267
Glycerophospholipid metabolism	hsa00564	0.358463	0.686267
Estrogen signaling pathway	hsa04915	0.358463	0.686267
Amino sugar and nucleotide sugar metabolism	hsa00520	0.363194	0.689457
Colorectal cancer	hsa05210	0.364867	0.689457
NF-kappa B signaling pathway	hsa04064	0.369263	0.693261
Salivary secretion	hsa04970	0.380963	0.710642
MAPK signaling pathway	hsa04010	0.390953	0.724632
Pertussis	hsa05133	0.393763	0.725222
Viral carcinogenesis	hsa05203	0.398572	0.729461
Toxoplasmosis	hsa05145	0.40176	0.730702
Endometrial cancer	hsa05213	0.40795	0.737351
Starch and sucrose metabolism	hsa00500	0.414032	0.743724
Fatty acid biosynthesis	hsa00061	0.420706	0.751076
Proteasome	hsa03050	0.442423	0.778457
Type II diabetes mellitus	hsa04930	0.442423	0.778457
Amyotrophic lateral sclerosis (ALS)	hsa05014	0.444068	0.778457
cAMP signaling pathway	hsa04024	0.46192	0.795175
Phototransduction	hsa04744	0.463499	0.795175
Vasopressin-regulated water reabsorption	hsa04962	0.46452	0.795175
Propanoate metabolism	hsa00640	0.464535	0.795175
Acute myeloid leukemia	hsa05221	0.481568	0.813812
Cysteine and methionine metabolism	hsa00270	0.486348	0.813812
Sphingolipid metabolism	hsa00600	0.486348	0.813812
Alzheimer's disease	hsa05010	0.486669	0.813812
Other glycan degradation	hsa00511	0.496462	0.813812
Glycosphingolipid biosynthesis - globo and isoglobo series	hsa00603	0.496462	0.813812
Glycosphingolipid biosynthesis - ganglio series	hsa00604	0.496462	0.813812
Transcriptional misregulation in cancer	hsa05202	0.497796	0.813812
Insulin resistance	hsa04931	0.502713	0.817259
Inflammatory bowel disease (IBD)	hsa05321	0.528989	0.845165
GABAergic synapse	hsa04727	0.529571	0.845165
Mitophagy - animal	hsa04137	0.535092	0.845165
Circadian entrainment	hsa04713	0.53528	0.845165
Relaxin signaling pathway	hsa04926	0.536153	0.845165
Tuberculosis	hsa05152	0.537304	0.845165
Nicotinate and nicotinamide metabolism	hsa00760	0.548173	0.857625
Chemokine signaling pathway	hsa04062	0.560201	0.869823
Pancreatic cancer	hsa05212	0.561947	0.869823
Calcium signaling pathway	hsa04020	0.567277	0.873426
Toll-like receptor signaling pathway	hsa04620	0.570487	0.873745
Oxidative phosphorylation	hsa00190	0.586327	0.893305
2-Oxocarboxylic acid metabolism	hsa01210	0.597505	0.904075
Antifolate resistance	hsa01523	0.600049	0.904075
B cell receptor signaling pathway	hsa04662	0.602717	0.904075
Lysine degradation	hsa00310	0.613951	0.913912
Epstein-Barr virus infection	hsa05169	0.615556	0.913912
cGMP-PKG signaling pathway	hsa04022	0.621223	0.917645
Endocrine resistance	hsa01522	0.628216	0.918106
GnRH signaling pathway	hsa04912	0.628216	0.918106
Prolactin signaling pathway	hsa04917	0.631001	0.918106
Autophagy - other	hsa04136	0.670185	0.96648
Glycosaminoglycan biosynthesis - heparan sulfate / heparin	hsa00534	0.682543	0.96648
ABC transporters	hsa02010	0.684094	0.96648
Oxytocin signaling pathway	hsa04921	0.691908	0.96648
Th17 cell differentiation	hsa04659	0.693532	0.96648
Aldosterone synthesis and secretion	hsa04925	0.693585	0.96648
Long-term potentiation	hsa04720	0.694613	0.96648
Non-small cell lung cancer	hsa05223	0.694613	0.96648
Glucagon signaling pathway	hsa04922	0.706406	0.96648
ErbB signaling pathway	hsa04012	0.706484	0.96648
Leukocyte transendothelial migration	hsa04670	0.706879	0.96648
Other types of O-glycan biosynthesis	hsa00514	0.707423	0.96648
Vitamin digestion and absorption	hsa04977	0.707423	0.96648
Ubiquinone and other terpenoid-quinone biosynthesis	hsa00130	0.718164	0.968174
Graft-versus-host disease	hsa05332	0.718164	0.968174
Neurotrophin signaling pathway	hsa04722	0.718645	0.968174
Shigellosis	hsa05131	0.723536	0.970272
TGF-beta signaling pathway	hsa04350	0.733595	0.974614
Notch signaling pathway	hsa04330	0.736052	0.974614
Adrenergic signaling in cardiomyocytes	hsa04261	0.73955	0.974614
Vascular smooth muscle contraction	hsa04270	0.740171	0.974614
Carbohydrate digestion and absorption	hsa04973	0.749042	0.976027
Lysosome	hsa04142	0.749736	0.976027
Regulation of lipolysis in adipocytes	hsa04923	0.751867	0.976027
Progesterone-mediated oocyte maturation	hsa04914	0.75466	0.976027
Renin secretion	hsa04924	0.770552	0.986337
RNA degradation	hsa03018	0.775498	0.986337
Primary bile acid biosynthesis	hsa00120	0.776189	0.986337
Glycosaminoglycan biosynthesis - keratan sulfate	hsa00533	0.776189	0.986337
Glycine, serine and threonine metabolism	hsa00260	0.782423	0.989935
Inflammatory mediator regulation of TRP channels	hsa04750	0.796986	0.999842
Ether lipid metabolism	hsa00565	0.79769	0.999842
Thiamine metabolism	hsa00730	0.800561	0.999842
Th1 and Th2 cell differentiation	hsa04658	0.819779	0.999989
Intestinal immune network for IgA production	hsa04672	0.824469	0.999989
Nicotine addiction	hsa05033	0.824469	0.999989
Phosphatidylinositol signaling system	hsa04070	0.824971	0.999989
Amphetamine addiction	hsa05031	0.829575	0.999989
Bacterial invasion of epithelial cells	hsa05100	0.8297	0.999989
Glutamatergic synapse	hsa04724	0.836538	0.999989
Axon guidance	hsa04360	0.839863	0.999989
Selenocompound metabolism	hsa00450	0.841641	0.999989
Long-term depression	hsa04730	0.862957	0.999989
Endocytosis	hsa04144	0.871136	0.999989
Platelet activation	hsa04611	0.879055	0.999989
Insulin secretion	hsa04911	0.890856	0.999989
alpha-Linolenic acid metabolism	hsa00592	0.900184	0.999989
Protein processing in endoplasmic reticulum	hsa04141	0.92053	0.999989
Mismatch repair	hsa03430	0.920764	0.999989
Pancreatic secretion	hsa04972	0.927266	0.999989
Protein export	hsa03060	0.929405	0.999989
Non-alcoholic fatty liver disease (NAFLD)	hsa04932	0.932422	0.999989
Viral myocarditis	hsa05416	0.935775	0.999989
Linoleic acid metabolism	hsa00591	0.937105	0.999989
Glycosphingolipid biosynthesis - lacto and neolacto series	hsa00601	0.937105	0.999989
African trypanosomiasis	hsa05143	0.95008	0.999989
Inositol phosphate metabolism	hsa00562	0.951182	0.999989
Olfactory transduction	hsa04740	0.955787	0.999989
Ubiquitin mediated proteolysis	hsa04120	0.9583	0.999989
VEGF signaling pathway	hsa04370	0.959353	0.999989
Hedgehog signaling pathway	hsa04340	0.960168	0.999989
Staphylococcus aureus infection	hsa05150	0.960382	0.999989
Huntington's disease	hsa05016	0.966927	0.999989
Morphine addiction	hsa05032	0.967078	0.999989
Primary immunodeficiency	hsa05340	0.968561	0.999989
Sphingolipid signaling pathway	hsa04071	0.971391	0.999989
Natural killer cell mediated cytotoxicity	hsa04650	0.971669	0.999989
Fc epsilon RI signaling pathway	hsa04664	0.973693	0.999989
mRNA surveillance pathway	hsa03015	0.979775	0.999989
Dopaminergic synapse	hsa04728	0.981085	0.999989
DNA replication	hsa03030	0.982369	0.999989
Pyrimidine metabolism	hsa00240	0.984709	0.999989
Purine metabolism	hsa00230	0.985576	0.999989
Taste transduction	hsa04742	0.987801	0.999989
Homologous recombination	hsa03440	0.988904	0.999989
Nucleotide excision repair	hsa03420	0.992162	0.999989
Ribosome biogenesis in eukaryotes	hsa03008	0.9926	0.999989
T cell receptor signaling pathway	hsa04660	0.99328	0.999989
Systemic lupus erythematosus	hsa05322	0.99328	0.999989
Neuroactive ligand-receptor interaction	hsa04080	0.993698	0.999989
Cocaine addiction	hsa05030	0.993783	0.999989
N-Glycan biosynthesis	hsa00510	0.99561	0.999989
Cholinergic synapse	hsa04725	0.995665	0.999989
Parkinson's disease	hsa05012	0.997218	0.999989
Fanconi anemia pathway	hsa03460	0.997542	0.999989
RNA transport	hsa03013	0.998947	0.999989
Alcoholism	hsa05034	0.999176	0.999989
Ribosome	hsa03010	0.999698	0.999989
Retrograde endocannabinoid signaling	hsa04723	0.99975	0.999989
Serotonergic synapse	hsa04726	0.999848	0.999989
Spliceosome	hsa03040	0.999989	0.999989
